# Supplementary material for: Mapping the Melanoma Plasma Proteome (MPP) Using Single-Shot Proteomics Interfaced with the WiMT Database
Source: Cancers (Basel). 2021 Dec 10;13(24):6224. doi: 10.3390/cancers13246224 (PMC8699267; doi:10.3390/cancers13246224)
Supplement: Supplementary file 1 [file cancers-13-06224-s001.zip › Supplementary tables Final 20211003.xlsx]

## Sheet: Table S1
	Table S1: Custom database description. Classification of proteins based on the depletion levels.
	Accession	Description	Gene	Pool	Low-Dep	Mid-Dep	Deep-Dep
	P04114	Apolipoprotein B-100 OS=Homo sapiens OX=9606 GN=APOB PE=1 SV=2	APOB	X	X	X	X
	P01024	Complement C3 OS=Homo sapiens OX=9606 GN=C3 PE=1 SV=2	C3	X	X	X	X
	P02768	Serum albumin OS=Homo sapiens OX=9606 GN=ALB PE=1 SV=2	ALB	X	X	X	X
	P0C0L5	Complement C4-B OS=Homo sapiens OX=9606 GN=C4B PE=1 SV=2	C4B	X	X	X	X
	P0C0L4	Complement C4-A OS=Homo sapiens OX=9606 GN=C4A PE=1 SV=2	C4A	X	X	X	X
	P01023	Alpha-2-macroglobulin OS=Homo sapiens OX=9606 GN=A2M PE=1 SV=3	A2M	X	X		X
	P02751-1	Isoform 1 of Fibronectin OS=Homo sapiens OX=9606 GN=FN1	FN1	X	X	X	X
	P02751-10	Isoform 10 of Fibronectin OS=Homo sapiens OX=9606 GN=FN1	FN1	X	X
	P00450	Ceruloplasmin OS=Homo sapiens OX=9606 GN=CP PE=1 SV=1	CP	X	X	X	X
	P02787	Serotransferrin OS=Homo sapiens OX=9606 GN=TF PE=1 SV=3	TF	X	X	X	X
	P01031	Complement C5 OS=Homo sapiens OX=9606 GN=C5 PE=1 SV=4	C5	X	X	X	X
	P08603	Complement factor H OS=Homo sapiens OX=9606 GN=CFH PE=1 SV=4	CFH	X	X	X	X
	Q14624-2	Isoform 2 of Inter-alpha-trypsin inhibitor heavy chain H4 OS=Homo sapiens OX=9606 GN=ITIH4	ITIH4	X	X	X
	P00747	Plasminogen OS=Homo sapiens OX=9606 GN=PLG PE=1 SV=2	PLG	X	X	X	X
	Q14624	Inter-alpha-trypsin inhibitor heavy chain H4 OS=Homo sapiens OX=9606 GN=ITIH4 PE=1 SV=4	ITIH4	X	X	X
	P19827	Inter-alpha-trypsin inhibitor heavy chain H1 OS=Homo sapiens OX=9606 GN=ITIH1 PE=1 SV=3	ITIH1	X	X	X	X
	P21333	Filamin-A OS=Homo sapiens OX=9606 GN=FLNA PE=1 SV=4	FLNA	X	X	X	X
	P02675	Fibrinogen beta chain OS=Homo sapiens OX=9606 GN=FGB PE=1 SV=2	FGB	X	X	X	X
	P02671	Fibrinogen alpha chain OS=Homo sapiens OX=9606 GN=FGA PE=1 SV=2	FGA	X	X	X	X
	P00734	Prothrombin OS=Homo sapiens OX=9606 GN=F2 PE=1 SV=2	F2	X	X	X	X
	Q9Y490	Talin-1 OS=Homo sapiens OX=9606 GN=TLN1 PE=1 SV=3	TLN1	X	X	X	X
	P19823	Inter-alpha-trypsin inhibitor heavy chain H2 OS=Homo sapiens OX=9606 GN=ITIH2 PE=1 SV=2	ITIH2	X	X	X	X
	P00751	Complement factor B OS=Homo sapiens OX=9606 GN=CFB PE=1 SV=2	CFB	X	X	X	X
	P04275	von Willebrand factor OS=Homo sapiens OX=9606 GN=VWF PE=1 SV=4	VWF	X	X	X	X
	P19827-2	Isoform 2 of Inter-alpha-trypsin inhibitor heavy chain H1 OS=Homo sapiens OX=9606 GN=ITIH1	ITIH1			X
	P01011	Alpha-1-antichymotrypsin OS=Homo sapiens OX=9606 GN=SERPINA3 PE=1 SV=2	SERPINA3	X	X	X	X
	P02774	Vitamin D-binding protein OS=Homo sapiens OX=9606 GN=GC PE=1 SV=2	GC	X	X	X	X
	P01008	Antithrombin-III OS=Homo sapiens OX=9606 GN=SERPINC1 PE=1 SV=1	SERPINC1	X	X	X	X
	P02647	Apolipoprotein A-I OS=Homo sapiens OX=9606 GN=APOA1 PE=1 SV=1	APOA1	X	X	X	X
	Q9Y6R7	IgGFc-binding protein OS=Homo sapiens OX=9606 GN=FCGBP PE=1 SV=3	FCGBP	X	X	X	X
	P12814	Alpha-actinin-1 OS=Homo sapiens OX=9606 GN=ACTN1 PE=1 SV=2	ACTN1	X	X	X	X
	P02790	Hemopexin OS=Homo sapiens OX=9606 GN=HPX PE=1 SV=2	HPX	X	X	X	X
	P43652	Afamin OS=Homo sapiens OX=9606 GN=AFM PE=1 SV=1	AFM	X	X	X	X
	P02679	Fibrinogen gamma chain OS=Homo sapiens OX=9606 GN=FGG PE=1 SV=3	FGG	X
	P02679-2	Isoform Gamma-A of Fibrinogen gamma chain OS=Homo sapiens OX=9606 GN=FGG	FGG		X
	O75882	Attractin OS=Homo sapiens OX=9606 GN=ATRN PE=1 SV=2	ATRN	X	X	X	X
	P04217	Alpha-1B-glycoprotein OS=Homo sapiens OX=9606 GN=A1BG PE=1 SV=4	A1BG	X	X	X	X
	Q96PD5	N-acetylmuramoyl-L-alanine amidase OS=Homo sapiens OX=9606 GN=PGLYRP2 PE=1 SV=1	PGLYRP2	X	X	X	X
	P06396	Gelsolin OS=Homo sapiens OX=9606 GN=GSN PE=1 SV=1	GSN	X	X	X	X
	P20742	Pregnancy zone protein OS=Homo sapiens OX=9606 GN=PZP PE=1 SV=4	PZP	X	X	X	X
	P06727	Apolipoprotein A-IV OS=Homo sapiens OX=9606 GN=APOA4 PE=1 SV=3	APOA4	X	X	X	X
	P05546	Heparin cofactor 2 OS=Homo sapiens OX=9606 GN=SERPIND1 PE=1 SV=3	SERPIND1	X	X	X	X
	P09871	Complement C1s subcomponent OS=Homo sapiens OX=9606 GN=C1S PE=1 SV=1	C1S	X	X	X	X
	P10643	Complement component C7 OS=Homo sapiens OX=9606 GN=C7 PE=1 SV=2	C7	X	X	X	X
	P06396-2	Isoform 2 of Gelsolin OS=Homo sapiens OX=9606 GN=GSN	GSN		X	X	X
	P13671	Complement component C6 OS=Homo sapiens OX=9606 GN=C6 PE=1 SV=3	C6	X	X	X	X
	P00738	Haptoglobin OS=Homo sapiens OX=9606 GN=HP PE=1 SV=1	HP	X	X	X	X
	P07358	Complement component C8 beta chain OS=Homo sapiens OX=9606 GN=C8B PE=1 SV=3	C8B	X	X	X	X
	P01857	Immunoglobulin heavy constant gamma 1 OS=Homo sapiens OX=9606 GN=IGHG1 PE=1 SV=1	IGHG1	X	X		X
	P05160	Coagulation factor XIII B chain OS=Homo sapiens OX=9606 GN=F13B PE=1 SV=3	F13B	X	X	X	X
	P04003	C4b-binding protein alpha chain OS=Homo sapiens OX=9606 GN=C4BPA PE=1 SV=2	C4BPA	X	X	X	X
	P01009	Alpha-1-antitrypsin OS=Homo sapiens OX=9606 GN=SERPINA1 PE=1 SV=3	SERPINA1	X	X	X	X
	P01042	Kininogen-1 OS=Homo sapiens OX=9606 GN=KNG1 PE=1 SV=2	KNG1	X	X	X	X
	P12259	Coagulation factor V OS=Homo sapiens OX=9606 GN=F5 PE=1 SV=4	F5	X	X	X	X
	P04217-2	Isoform 2 of Alpha-1B-glycoprotein OS=Homo sapiens OX=9606 GN=A1BG	A1BG	X	X	X	X
	P18206	Vinculin OS=Homo sapiens OX=9606 GN=VCL PE=1 SV=4	VCL	X	X	X	X
	P01859	Immunoglobulin heavy constant gamma 2 OS=Homo sapiens OX=9606 GN=IGHG2 PE=1 SV=2	IGHG2	X	X		X
	P01876	Immunoglobulin heavy constant alpha 1 OS=Homo sapiens OX=9606 GN=IGHA1 PE=1 SV=2	IGHA1	X	X	X	X
	P00736	Complement C1r subcomponent OS=Homo sapiens OX=9606 GN=C1R PE=1 SV=2	C1R	X	X	X	X
	P06681	Complement C2 OS=Homo sapiens OX=9606 GN=C2 PE=1 SV=2	C2	X	X	X	X
	P02760	Protein AMBP OS=Homo sapiens OX=9606 GN=AMBP PE=1 SV=1	AMBP	X	X	X	X
	P22105-1	Isoform 3 of Tenascin-X OS=Homo sapiens OX=9606 GN=TNXB	TNXB	X	X	X	X
	Q06033	Inter-alpha-trypsin inhibitor heavy chain H3 OS=Homo sapiens OX=9606 GN=ITIH3 PE=1 SV=2	ITIH3	X	X	X	X
	P01871	Immunoglobulin heavy constant mu OS=Homo sapiens OX=9606 GN=IGHM PE=1 SV=4	IGHM	X	X		X
	P04264	Keratin, type II cytoskeletal 1 OS=Homo sapiens OX=9606 GN=KRT1 PE=1 SV=6	KRT1	X	X	X	X
	P05155	Plasma protease C1 inhibitor OS=Homo sapiens OX=9606 GN=SERPING1 PE=1 SV=2	SERPING1	X	X	X	X
	P35908	Keratin, type II cytoskeletal 2 epidermal OS=Homo sapiens OX=9606 GN=KRT2 PE=1 SV=2	KRT2	X	X	X	X
	P05156	Complement factor I OS=Homo sapiens OX=9606 GN=CFI PE=1 SV=2	CFI	X	X	X	X
	P10909-6	Isoform 6 of Clusterin OS=Homo sapiens OX=9606 GN=CLU	CLU	X	X	X	X
	P02765	Alpha-2-HS-glycoprotein OS=Homo sapiens OX=9606 GN=AHSG PE=1 SV=2	AHSG	X	X	X	X
	P35527	Keratin, type I cytoskeletal 9 OS=Homo sapiens OX=9606 GN=KRT9 PE=1 SV=3	KRT9	X	X	X	X
	P09172	Dopamine beta-hydroxylase OS=Homo sapiens OX=9606 GN=DBH PE=1 SV=3	DBH	X	X	X	X
	Q16610	Extracellular matrix protein 1 OS=Homo sapiens OX=9606 GN=ECM1 PE=1 SV=2	ECM1	X	X	X	X
	P13645	Keratin, type I cytoskeletal 10 OS=Homo sapiens OX=9606 GN=KRT10 PE=1 SV=6	KRT10	X	X	X	X
	P00488	Coagulation factor XIII A chain OS=Homo sapiens OX=9606 GN=F13A1 PE=1 SV=4	F13A1	X	X	X	X
	P01860	Immunoglobulin heavy constant gamma 3 OS=Homo sapiens OX=9606 GN=IGHG3 PE=1 SV=2	IGHG3	X	X		X
	P23142	Fibulin-1 OS=Homo sapiens OX=9606 GN=FBLN1 PE=1 SV=4	FBLN1	X	X	X	X
	P07357	Complement component C8 alpha chain OS=Homo sapiens OX=9606 GN=C8A PE=1 SV=2	C8A	X	X	X	X
	P35858	Insulin-like growth factor-binding protein complex acid labile subunit OS=Homo sapiens OX=9606 GN=IGFALS PE=1 SV=1	IGFALS	X	X	X	X
	P01019	Angiotensinogen OS=Homo sapiens OX=9606 GN=AGT PE=1 SV=1	AGT	X	X	X	X
	P07996	Thrombospondin-1 OS=Homo sapiens OX=9606 GN=THBS1 PE=1 SV=2	THBS1	X	X	X	X
	P03952	Plasma kallikrein OS=Homo sapiens OX=9606 GN=KLKB1 PE=1 SV=1	KLKB1	X	X	X	X
	P01042-2	Isoform LMW of Kininogen-1 OS=Homo sapiens OX=9606 GN=KNG1	KNG1	X	X	X	X
	Q86VB7	Scavenger receptor cysteine-rich type 1 protein M130 OS=Homo sapiens OX=9606 GN=CD163 PE=1 SV=2	CD163	X	X	X	X
	P80108	Phosphatidylinositol-glycan-specific phospholipase D OS=Homo sapiens OX=9606 GN=GPLD1 PE=1 SV=3	GPLD1	X	X	X	X
	P08697	Alpha-2-antiplasmin OS=Homo sapiens OX=9606 GN=SERPINF2 PE=1 SV=3	SERPINF2	X	X	X	X
	P01861	Immunoglobulin heavy constant gamma 4 OS=Homo sapiens OX=9606 GN=IGHG4 PE=1 SV=1	IGHG4	X	X
	P04004	Vitronectin OS=Homo sapiens OX=9606 GN=VTN PE=1 SV=1	VTN	X	X	X	X
	P04196	Histidine-rich glycoprotein OS=Homo sapiens OX=9606 GN=HRG PE=1 SV=1	HRG	X	X	X	X
	P02748	Complement component C9 OS=Homo sapiens OX=9606 GN=C9 PE=1 SV=2	C9	X	X	X	X
	P60709	Actin, cytoplasmic 1 OS=Homo sapiens OX=9606 GN=ACTB PE=1 SV=1	ACTB	X	X		X
	P29622	Kallistatin OS=Homo sapiens OX=9606 GN=SERPINA4 PE=1 SV=3	SERPINA4	X	X	X	X
	Q07954	Prolow-density lipoprotein receptor-related protein 1 OS=Homo sapiens OX=9606 GN=LRP1 PE=1 SV=2	LRP1	X	X	X	X
	P02766	Transthyretin OS=Homo sapiens OX=9606 GN=TTR PE=1 SV=1	TTR	X	X	X	X
	P48740-2	Isoform 2 of Mannan-binding lectin serine protease 1 OS=Homo sapiens OX=9606 GN=MASP1	MASP1	X	X	X	X
	P63261	Actin, cytoplasmic 2 OS=Homo sapiens OX=9606 GN=ACTG1 PE=1 SV=1	ACTG1	X	X
	P49747	Cartilage oligomeric matrix protein OS=Homo sapiens OX=9606 GN=COMP PE=1 SV=2	COMP	X	X	X	X
	P06276	Cholinesterase OS=Homo sapiens OX=9606 GN=BCHE PE=1 SV=1	BCHE	X	X	X	X
	O00533	Neural cell adhesion molecule L1-like protein OS=Homo sapiens OX=9606 GN=CHL1 PE=1 SV=4	CHL1	X	X	X	X
	P27797	Calreticulin OS=Homo sapiens OX=9606 GN=CALR PE=1 SV=1	CALR		X	X	X
	P23142-4	Isoform C of Fibulin-1 OS=Homo sapiens OX=9606 GN=FBLN1	FBLN1	X	X	X	X
	P00748	Coagulation factor XII OS=Homo sapiens OX=9606 GN=F12 PE=1 SV=3	F12	X	X	X	X
	P98160	Basement membrane-specific heparan sulfate proteoglycan core protein OS=Homo sapiens OX=9606 GN=HSPG2 PE=1 SV=4	HSPG2	X	X	X	X
	P25311	Zinc-alpha-2-glycoprotein OS=Homo sapiens OX=9606 GN=AZGP1 PE=1 SV=2	AZGP1	X	X	X	X
	P15144	Aminopeptidase N OS=Homo sapiens OX=9606 GN=ANPEP PE=1 SV=4	ANPEP	X	X	X	X
	P24821	Tenascin OS=Homo sapiens OX=9606 GN=TNC PE=1 SV=3	TNC				X
	O43707	Alpha-actinin-4 OS=Homo sapiens OX=9606 GN=ACTN4 PE=1 SV=2	ACTN4			X	X
	P24821-4	Isoform 4 of Tenascin OS=Homo sapiens OX=9606 GN=TNC	TNC				X
	P13796	Plastin-2 OS=Homo sapiens OX=9606 GN=LCP1 PE=1 SV=6	LCP1	X	X	X	X
	P48740	Mannan-binding lectin serine protease 1 OS=Homo sapiens OX=9606 GN=MASP1 PE=1 SV=3	MASP1	X	X	X	X
	P27169	Serum paraoxonase/arylesterase 1 OS=Homo sapiens OX=9606 GN=PON1 PE=1 SV=3	PON1	X	X	X	X
	P36955	Pigment epithelium-derived factor OS=Homo sapiens OX=9606 GN=SERPINF1 PE=1 SV=4	SERPINF1	X	X	X	X
	P11717	Cation-independent mannose-6-phosphate receptor OS=Homo sapiens OX=9606 GN=IGF2R PE=1 SV=3	IGF2R		X	X	X
	P03951	Coagulation factor XI OS=Homo sapiens OX=9606 GN=F11 PE=1 SV=1	F11	X	X	X	X
	P08519	Apolipoprotein(a) OS=Homo sapiens OX=9606 GN=LPA PE=1 SV=1	LPA	X	X	X	X
	O00391	Sulfhydryl oxidase 1 OS=Homo sapiens OX=9606 GN=QSOX1 PE=1 SV=3	QSOX1	X	X	X	X
	P22792	Carboxypeptidase N subunit 2 OS=Homo sapiens OX=9606 GN=CPN2 PE=1 SV=3	CPN2	X	X	X	X
	P00739	Haptoglobin-related protein OS=Homo sapiens OX=9606 GN=HPR PE=2 SV=2	HPR	X	X
	P01834	Immunoglobulin kappa constant OS=Homo sapiens OX=9606 GN=IGKC PE=1 SV=2	IGKC	X	X	X	X
	P26927	Hepatocyte growth factor-like protein OS=Homo sapiens OX=9606 GN=MST1 PE=1 SV=2	MST1	X	X	X	X
	P04040	Catalase OS=Homo sapiens OX=9606 GN=CAT PE=1 SV=3	CAT	X	X	X	X
	Q12860	Contactin-1 OS=Homo sapiens OX=9606 GN=CNTN1 PE=1 SV=1	CNTN1	X	X	X	X
	P02753	Retinol-binding protein 4 OS=Homo sapiens OX=9606 GN=RBP4 PE=1 SV=3	RBP4	X	X	X	X
	P54289-4	Isoform 4 of Voltage-dependent calcium channel subunit alpha-2/delta-1 OS=Homo sapiens OX=9606 GN=CACNA2D1	CACNA2D1				X
	P54289-2	Isoform 2 of Voltage-dependent calcium channel subunit alpha-2/delta-1 OS=Homo sapiens OX=9606 GN=CACNA2D1	CACNA2D1				X
	P19320	Vascular cell adhesion protein 1 OS=Homo sapiens OX=9606 GN=VCAM1 PE=1 SV=1	VCAM1	X	X	X	X
	Q7Z7M0	Multiple epidermal growth factor-like domains protein 8 OS=Homo sapiens OX=9606 GN=MEGF8 PE=1 SV=2	MEGF8	X	X	X	X
	Q15582	Transforming growth factor-beta-induced protein ig-h3 OS=Homo sapiens OX=9606 GN=TGFBI PE=1 SV=1	TGFBI	X	X	X	X
	P43251	Biotinidase OS=Homo sapiens OX=9606 GN=BTD PE=1 SV=2	BTD	X	X	X	X
	P15169	Carboxypeptidase N catalytic chain OS=Homo sapiens OX=9606 GN=CPN1 PE=1 SV=1	CPN1	X	X	X	X
	P05543	Thyroxine-binding globulin OS=Homo sapiens OX=9606 GN=SERPINA7 PE=1 SV=2	SERPINA7	X	X	X	X
	P04278	Sex hormone-binding globulin OS=Homo sapiens OX=9606 GN=SHBG PE=1 SV=2	SHBG	X	X	X	X
	Q04756	Hepatocyte growth factor activator OS=Homo sapiens OX=9606 GN=HGFAC PE=1 SV=1	HGFAC	X	X	X	X
	Q6UXB8	Peptidase inhibitor 16 OS=Homo sapiens OX=9606 GN=PI16 PE=1 SV=1	PI16	X	X	X	X
	Q14515	SPARC-like protein 1 OS=Homo sapiens OX=9606 GN=SPARCL1 PE=1 SV=2	SPARCL1	X	X	X	X
	P00742	Coagulation factor X OS=Homo sapiens OX=9606 GN=F10 PE=1 SV=2	F10	X	X	X	X
	P02749	Beta-2-glycoprotein 1 OS=Homo sapiens OX=9606 GN=APOH PE=1 SV=3	APOH	X	X	X	X
	Q96KN2	Beta-Ala-His dipeptidase OS=Homo sapiens OX=9606 GN=CNDP1 PE=1 SV=4	CNDP1	X	X	X	X
	P02763	Alpha-1-acid glycoprotein 1 OS=Homo sapiens OX=9606 GN=ORM1 PE=1 SV=1	ORM1	X	X		X
	P02649	Apolipoprotein E OS=Homo sapiens OX=9606 GN=APOE PE=1 SV=1	APOE	X	X	X	X
	O95497	Pantetheinase OS=Homo sapiens OX=9606 GN=VNN1 PE=1 SV=2	VNN1	X	X	X	X
	Q92954-6	Isoform F of Proteoglycan 4 OS=Homo sapiens OX=9606 GN=PRG4	PRG4				X
	Q92954-3	Isoform C of Proteoglycan 4 OS=Homo sapiens OX=9606 GN=PRG4	PRG4	X	X		X
	Q86UX7	Fermitin family homolog 3 OS=Homo sapiens OX=9606 GN=FERMT3 PE=1 SV=1	FERMT3	X	X	X	X
	P19652	Alpha-1-acid glycoprotein 2 OS=Homo sapiens OX=9606 GN=ORM2 PE=1 SV=2	ORM2	X	X		X
	Q96IY4	Carboxypeptidase B2 OS=Homo sapiens OX=9606 GN=CPB2 PE=1 SV=2	CPB2	X	X	X	X
	P13591	Neural cell adhesion molecule 1 OS=Homo sapiens OX=9606 GN=NCAM1 PE=1 SV=3	NCAM1	X	X	X	X
	P35555	Fibrillin-1 OS=Homo sapiens OX=9606 GN=FBN1 PE=1 SV=4	FBN1		X	X	X
	P48740-3	Isoform 3 of Mannan-binding lectin serine protease 1 OS=Homo sapiens OX=9606 GN=MASP1	MASP1			X	X
	Q9NZP8	Complement C1r subcomponent-like protein OS=Homo sapiens OX=9606 GN=C1RL PE=1 SV=2	C1RL	X	X	X	X
	P69905	Hemoglobin subunit alpha OS=Homo sapiens OX=9606 GN=HBA1 PE=1 SV=2	HBA1	X	X	X	X
	P35579	Myosin-9 OS=Homo sapiens OX=9606 GN=MYH9 PE=1 SV=4	MYH9	X			X
	P11021	Endoplasmic reticulum chaperone BiP OS=Homo sapiens OX=9606 GN=HSPA5 PE=1 SV=2	HSPA5	X	X	X	X
	P00740	Coagulation factor IX OS=Homo sapiens OX=9606 GN=F9 PE=1 SV=2	F9	X	X	X	X
	P00915	Carbonic anhydrase 1 OS=Homo sapiens OX=9606 GN=CA1 PE=1 SV=2	CA1	X	X	X	X
	P27487	Dipeptidyl peptidase 4 OS=Homo sapiens OX=9606 GN=DPP4 PE=1 SV=2	DPP4		X	X	X
	P22897	Macrophage mannose receptor 1 OS=Homo sapiens OX=9606 GN=MRC1 PE=1 SV=1	MRC1		X	X	X
	Q9UK55	Protein Z-dependent protease inhibitor OS=Homo sapiens OX=9606 GN=SERPINA10 PE=1 SV=1	SERPINA10	X	X	X	X
	P07360	Complement component C8 gamma chain OS=Homo sapiens OX=9606 GN=C8G PE=1 SV=3	C8G	X	X	X	X
	P35443	Thrombospondin-4 OS=Homo sapiens OX=9606 GN=THBS4 PE=1 SV=2	THBS4	X	X	X	X
	P12111	Collagen alpha-3(VI) chain OS=Homo sapiens OX=9606 GN=COL6A3 PE=1 SV=5	COL6A3			X	X
	P07225	Vitamin K-dependent protein S OS=Homo sapiens OX=9606 GN=PROS1 PE=1 SV=1	PROS1	X	X	X	X
	Q08380	Galectin-3-binding protein OS=Homo sapiens OX=9606 GN=LGALS3BP PE=1 SV=1	LGALS3BP	X	X	X	X
	P13647	Keratin, type II cytoskeletal 5 OS=Homo sapiens OX=9606 GN=KRT5 PE=1 SV=3	KRT5	X	X	X	X
	P68871	Hemoglobin subunit beta OS=Homo sapiens OX=9606 GN=HBB PE=1 SV=2	HBB	X	X	X	X
	P51884	Lumican OS=Homo sapiens OX=9606 GN=LUM PE=1 SV=2	LUM	X	X	X	X
	P08185	Corticosteroid-binding globulin OS=Homo sapiens OX=9606 GN=SERPINA6 PE=1 SV=1	SERPINA6	X	X	X	X
	P43121	Cell surface glycoprotein MUC18 OS=Homo sapiens OX=9606 GN=MCAM PE=1 SV=2	MCAM	X	X	X	X
	Q03591	Complement factor H-related protein 1 OS=Homo sapiens OX=9606 GN=CFHR1 PE=1 SV=2	CFHR1	X	X	X	X
	P11142	Heat shock cognate 71 kDa protein OS=Homo sapiens OX=9606 GN=HSPA8 PE=1 SV=1	HSPA8	X	X	X	X
	Q6YHK3	CD109 antigen OS=Homo sapiens OX=9606 GN=CD109 PE=1 SV=2	CD109		X	X	X
	P01877	Immunoglobulin heavy constant alpha 2 OS=Homo sapiens OX=9606 GN=IGHA2 PE=1 SV=4	IGHA2	X	X
	P12955	Xaa-Pro dipeptidase OS=Homo sapiens OX=9606 GN=PEPD PE=1 SV=3	PEPD	X	X	X	X
	P02750	Leucine-rich alpha-2-glycoprotein OS=Homo sapiens OX=9606 GN=LRG1 PE=1 SV=2	LRG1	X	X	X	X
	Q76LX8	A disintegrin and metalloproteinase with thrombospondin motifs 13 OS=Homo sapiens OX=9606 GN=ADAMTS13 PE=1 SV=1	ADAMTS13		X	X	X
	P12111-4	Isoform 4 of Collagen alpha-3(VI) chain OS=Homo sapiens OX=9606 GN=COL6A3	COL6A3			X	X
	P00746	Complement factor D OS=Homo sapiens OX=9606 GN=CFD PE=1 SV=5	CFD	X	X	X	X
	O95479	GDH/6PGL endoplasmic bifunctional protein OS=Homo sapiens OX=9606 GN=H6PD PE=1 SV=2	H6PD		X	X	X
	P30101	Protein disulfide-isomerase A3 OS=Homo sapiens OX=9606 GN=PDIA3 PE=1 SV=4	PDIA3	X	X	X	X
	Q12805	EGF-containing fibulin-like extracellular matrix protein 1 OS=Homo sapiens OX=9606 GN=EFEMP1 PE=1 SV=2	EFEMP1	X	X	X	X
	P02746	Complement C1q subcomponent subunit B OS=Homo sapiens OX=9606 GN=C1QB PE=1 SV=3	C1QB	X	X	X	X
	P08571	Monocyte differentiation antigen CD14 OS=Homo sapiens OX=9606 GN=CD14 PE=1 SV=2	CD14	X	X	X	X
	P0DOY2	Immunoglobulin lambda constant 2 OS=Homo sapiens OX=9606 GN=IGLC2 PE=1 SV=1	IGLC2	X	X	X	X
	P02533	Keratin, type I cytoskeletal 14 OS=Homo sapiens OX=9606 GN=KRT14 PE=1 SV=4	KRT14	X	X	X	X
	P10586	Receptor-type tyrosine-protein phosphatase F OS=Homo sapiens OX=9606 GN=PTPRF PE=1 SV=2	PTPRF			X	X
	P04070	Vitamin K-dependent protein C OS=Homo sapiens OX=9606 GN=PROC PE=1 SV=1	PROC	X	X	X	X
	P02743	Serum amyloid P-component OS=Homo sapiens OX=9606 GN=APCS PE=1 SV=2	APCS	X	X	X	X
	P07942	Laminin subunit beta-1 OS=Homo sapiens OX=9606 GN=LAMB1 PE=1 SV=2	LAMB1			X	X
	O43866	CD5 antigen-like OS=Homo sapiens OX=9606 GN=CD5L PE=1 SV=1	CD5L	X	X	X	X
	O00187	Mannan-binding lectin serine protease 2 OS=Homo sapiens OX=9606 GN=MASP2 PE=1 SV=4	MASP2	X	X	X	X
	P02538	Keratin, type II cytoskeletal 6A OS=Homo sapiens OX=9606 GN=KRT6A PE=1 SV=3	KRT6A	X	X	X	X
	O75083	WD repeat-containing protein 1 OS=Homo sapiens OX=9606 GN=WDR1 PE=1 SV=4	WDR1	X	X	X	X
	O75636	Ficolin-3 OS=Homo sapiens OX=9606 GN=FCN3 PE=1 SV=2	FCN3	X	X	X	X
	P04075	Fructose-bisphosphate aldolase A OS=Homo sapiens OX=9606 GN=ALDOA PE=1 SV=2	ALDOA	X	X	X	X
	P54802	Alpha-N-acetylglucosaminidase OS=Homo sapiens OX=9606 GN=NAGLU PE=1 SV=2	NAGLU		X	X	X
	Q13822	Ectonucleotide pyrophosphatase/phosphodiesterase family member 2 OS=Homo sapiens OX=9606 GN=ENPP2 PE=1 SV=3	ENPP2		X	X	X
	O14786	Neuropilin-1 OS=Homo sapiens OX=9606 GN=NRP1 PE=1 SV=3	NRP1		X	X	X
	B9A064	Immunoglobulin lambda-like polypeptide 5 OS=Homo sapiens OX=9606 GN=IGLL5 PE=2 SV=2	IGLL5	X	X
	P31150	Rab GDP dissociation inhibitor alpha OS=Homo sapiens OX=9606 GN=GDI1 PE=1 SV=2	GDI1			X	X
	P08779	Keratin, type I cytoskeletal 16 OS=Homo sapiens OX=9606 GN=KRT16 PE=1 SV=4	KRT16	X	X	X	X
	P09486	SPARC OS=Homo sapiens OX=9606 GN=SPARC PE=1 SV=1	SPARC	X	X	X	X
	Q9H4A9	Dipeptidase 2 OS=Homo sapiens OX=9606 GN=DPEP2 PE=1 SV=3	DPEP2		X	X	X
	P04259	Keratin, type II cytoskeletal 6B OS=Homo sapiens OX=9606 GN=KRT6B PE=1 SV=5	KRT6B			X	X
	P12821	Angiotensin-converting enzyme OS=Homo sapiens OX=9606 GN=ACE PE=1 SV=1	ACE			X	X
	P22891	Vitamin K-dependent protein Z OS=Homo sapiens OX=9606 GN=PROZ PE=1 SV=2	PROZ	X	X	X	X
	Q14520	Hyaluronan-binding protein 2 OS=Homo sapiens OX=9606 GN=HABP2 PE=1 SV=1	HABP2	X	X	X	X
	P05154	Plasma serine protease inhibitor OS=Homo sapiens OX=9606 GN=SERPINA5 PE=1 SV=3	SERPINA5	X	X	X	X
	P14618	Pyruvate kinase PKM OS=Homo sapiens OX=9606 GN=PKM PE=1 SV=4	PKM		X	X
	Q12884	Prolyl endopeptidase FAP OS=Homo sapiens OX=9606 GN=FAP PE=1 SV=5	FAP		X	X	X
	P14625	Endoplasmin OS=Homo sapiens OX=9606 GN=HSP90B1 PE=1 SV=1	HSP90B1	X	X	X	X
	O95445	Apolipoprotein M OS=Homo sapiens OX=9606 GN=APOM PE=1 SV=2	APOM	X	X	X
	O14791	Apolipoprotein L1 OS=Homo sapiens OX=9606 GN=APOL1 PE=1 SV=5	APOL1	X	X	X	X
	P50395	Rab GDP dissociation inhibitor beta OS=Homo sapiens OX=9606 GN=GDI2 PE=1 SV=2	GDI2		X	X	X
	P08709	Coagulation factor VII OS=Homo sapiens OX=9606 GN=F7 PE=1 SV=1	F7	X	X	X	X
	Q92859	Neogenin OS=Homo sapiens OX=9606 GN=NEO1 PE=1 SV=2	NEO1		X	X	X
	P68133	Actin, alpha skeletal muscle OS=Homo sapiens OX=9606 GN=ACTA1 PE=1 SV=1	ACTA1	X	X	X	X
	P24043	Laminin subunit alpha-2 OS=Homo sapiens OX=9606 GN=LAMA2 PE=1 SV=4	LAMA2			X	X
	P23470	Receptor-type tyrosine-protein phosphatase gamma OS=Homo sapiens OX=9606 GN=PTPRG PE=1 SV=4	PTPRG	X	X	X	X
	Q16853	Membrane primary amine oxidase OS=Homo sapiens OX=9606 GN=AOC3 PE=1 SV=3	AOC3		X	X	X
	Q9UGM5	Fetuin-B OS=Homo sapiens OX=9606 GN=FETUB PE=1 SV=2	FETUB	X	X	X	X
	P63104	14-3-3 protein zeta/delta OS=Homo sapiens OX=9606 GN=YWHAZ PE=1 SV=1	YWHAZ	X	X	X	X
	Q9P232	Contactin-3 OS=Homo sapiens OX=9606 GN=CNTN3 PE=1 SV=3	CNTN3			X	X
	P27918	Properdin OS=Homo sapiens OX=9606 GN=CFP PE=1 SV=2	CFP	X	X	X	X
	P33151	Cadherin-5 OS=Homo sapiens OX=9606 GN=CDH5 PE=1 SV=5	CDH5	X	X	X	X
	Q6EMK4	Vasorin OS=Homo sapiens OX=9606 GN=VASN PE=1 SV=1	VASN	X	X	X	X
	P18428	Lipopolysaccharide-binding protein OS=Homo sapiens OX=9606 GN=LBP PE=1 SV=3	LBP	X	X	X	X
	Q2TV78	Putative macrophage stimulating 1-like protein OS=Homo sapiens OX=9606 GN=MST1L PE=2 SV=2	MST1L	X	X	X	X
	P60174-1	Isoform 2 of Triosephosphate isomerase OS=Homo sapiens OX=9606 GN=TPI1	TPI1	X	X	X	X
	P55058	Phospholipid transfer protein OS=Homo sapiens OX=9606 GN=PLTP PE=1 SV=1	PLTP	X	X	X	X
	P05452	Tetranectin OS=Homo sapiens OX=9606 GN=CLEC3B PE=1 SV=3	CLEC3B	X	X	X	X
	Q92820	Gamma-glutamyl hydrolase OS=Homo sapiens OX=9606 GN=GGH PE=1 SV=2	GGH	X	X	X	X
	Q9NQ79	Cartilage acidic protein 1 OS=Homo sapiens OX=9606 GN=CRTAC1 PE=1 SV=2	CRTAC1	X	X	X	X
	P04406	Glyceraldehyde-3-phosphate dehydrogenase OS=Homo sapiens OX=9606 GN=GAPDH PE=1 SV=3	GAPDH	X	X	X	X
	P13667	Protein disulfide-isomerase A4 OS=Homo sapiens OX=9606 GN=PDIA4 PE=1 SV=2	PDIA4			X	X
	P33908	Mannosyl-oligosaccharide 1,2-alpha-mannosidase IA OS=Homo sapiens OX=9606 GN=MAN1A1 PE=1 SV=3	MAN1A1	X	X	X	X
	P17936	Insulin-like growth factor-binding protein 3 OS=Homo sapiens OX=9606 GN=IGFBP3 PE=1 SV=2	IGFBP3	X	X	X	X
	P04745	Alpha-amylase 1 OS=Homo sapiens OX=9606 GN=AMY1A PE=1 SV=2	AMY1A				X
	P19961	Alpha-amylase 2B OS=Homo sapiens OX=9606 GN=AMY2B PE=1 SV=1	AMY2B				X
	P02042	Hemoglobin subunit delta OS=Homo sapiens OX=9606 GN=HBD PE=1 SV=2	HBD	X	X		X
	P67936	Tropomyosin alpha-4 chain OS=Homo sapiens OX=9606 GN=TPM4 PE=1 SV=3	TPM4	X	X	X	X
	Q10588	ADP-ribosyl cyclase/cyclic ADP-ribose hydrolase 2 OS=Homo sapiens OX=9606 GN=BST1 PE=1 SV=2	BST1	X	X	X	X
	P04746	Pancreatic alpha-amylase OS=Homo sapiens OX=9606 GN=AMY2A PE=1 SV=2	AMY2A			X	X
	P37802	Transgelin-2 OS=Homo sapiens OX=9606 GN=TAGLN2 PE=1 SV=3	TAGLN2	X	X	X	X
	P08195	4F2 cell-surface antigen heavy chain OS=Homo sapiens OX=9606 GN=SLC3A2 PE=1 SV=3	SLC3A2		X	X	X
	Q86YZ3	Hornerin OS=Homo sapiens OX=9606 GN=HRNR PE=1 SV=2	HRNR	X	X	X	X
	P00390	Glutathione reductase, mitochondrial OS=Homo sapiens OX=9606 GN=GSR PE=1 SV=2	GSR	X	X	X	X
	P40197	Platelet glycoprotein V OS=Homo sapiens OX=9606 GN=GP5 PE=1 SV=1	GP5	X	X	X	X
	P35916-1	Isoform 2 of Vascular endothelial growth factor receptor 3 OS=Homo sapiens OX=9606 GN=FLT4	FLT4		X	X	X
	P00533	Epidermal growth factor receptor OS=Homo sapiens OX=9606 GN=EGFR PE=1 SV=2	EGFR			X	X
	P02745	Complement C1q subcomponent subunit A OS=Homo sapiens OX=9606 GN=C1QA PE=1 SV=2	C1QA	X	X	X	X
	Q9BXR6	Complement factor H-related protein 5 OS=Homo sapiens OX=9606 GN=CFHR5 PE=1 SV=1	CFHR5	X	X	X	X
	P62258	14-3-3 protein epsilon OS=Homo sapiens OX=9606 GN=YWHAE PE=1 SV=1	YWHAE	X	X	X	X
	Q01459	Di-N-acetylchitobiase OS=Homo sapiens OX=9606 GN=CTBS PE=1 SV=1	CTBS	X	X	X	X
	P14618-2	Isoform M1 of Pyruvate kinase PKM OS=Homo sapiens OX=9606 GN=PKM	PKM			X
	Q15063-5	Isoform 5 of Periostin OS=Homo sapiens OX=9606 GN=POSTN	POSTN		X	X	X
	P61981	14-3-3 protein gamma OS=Homo sapiens OX=9606 GN=YWHAG PE=1 SV=2	YWHAG		X	X	X
	Q86WI1	Fibrocystin-L OS=Homo sapiens OX=9606 GN=PKHD1L1 PE=2 SV=2	PKHD1L1			X	X
	Q9UHG3	Prenylcysteine oxidase 1 OS=Homo sapiens OX=9606 GN=PCYOX1 PE=1 SV=3	PCYOX1	X	X	X	X
	P26038	Moesin OS=Homo sapiens OX=9606 GN=MSN PE=1 SV=3	MSN	X	X	X	X
	Q9UBG0	C-type mannose receptor 2 OS=Homo sapiens OX=9606 GN=MRC2 PE=1 SV=2	MRC2			X	X
	Q13332-2	Isoform PTPS-MEA of Receptor-type tyrosine-protein phosphatase S OS=Homo sapiens OX=9606 GN=PTPRS	PTPRS		X	X	X
	P04180	Phosphatidylcholine-sterol acyltransferase OS=Homo sapiens OX=9606 GN=LCAT PE=1 SV=1	LCAT	X	X	X	X
	Q07075	Glutamyl aminopeptidase OS=Homo sapiens OX=9606 GN=ENPEP PE=1 SV=3	ENPEP			X	X
	P16930	Fumarylacetoacetase OS=Homo sapiens OX=9606 GN=FAH PE=1 SV=2	FAH	X	X	X	X
	P06744	Glucose-6-phosphate isomerase OS=Homo sapiens OX=9606 GN=GPI PE=1 SV=4	GPI		X	X	X
	P00918	Carbonic anhydrase 2 OS=Homo sapiens OX=9606 GN=CA2 PE=1 SV=2	CA2	X	X	X	X
	P02792	Ferritin light chain OS=Homo sapiens OX=9606 GN=FTL PE=1 SV=2	FTL	X	X	X	X
	P08294	Extracellular superoxide dismutase [Cu-Zn] OS=Homo sapiens OX=9606 GN=SOD3 PE=1 SV=2	SOD3	X	X	X	X
	P32004	Neural cell adhesion molecule L1 OS=Homo sapiens OX=9606 GN=L1CAM PE=1 SV=2	L1CAM	X			X
	Q12913	Receptor-type tyrosine-protein phosphatase eta OS=Homo sapiens OX=9606 GN=PTPRJ PE=1 SV=3	PTPRJ	X	X	X	X
	P22352	Glutathione peroxidase 3 OS=Homo sapiens OX=9606 GN=GPX3 PE=1 SV=2	GPX3	X	X	X	X
	P01880	Immunoglobulin heavy constant delta OS=Homo sapiens OX=9606 GN=IGHD PE=1 SV=3	IGHD	X	X	X	X
	P02747	Complement C1q subcomponent subunit C OS=Homo sapiens OX=9606 GN=C1QC PE=1 SV=3	C1QC	X	X	X	X
	P07237	Protein disulfide-isomerase OS=Homo sapiens OX=9606 GN=P4HB PE=1 SV=3	P4HB	X	X	X	X
	Q14766	Latent-transforming growth factor beta-binding protein 1 OS=Homo sapiens OX=9606 GN=LTBP1 PE=1 SV=4	LTBP1		X	X	X
	Q15166	Serum paraoxonase/lactonase 3 OS=Homo sapiens OX=9606 GN=PON3 PE=1 SV=3	PON3	X	X	X	X
	P40189	Interleukin-6 receptor subunit beta OS=Homo sapiens OX=9606 GN=IL6ST PE=1 SV=2	IL6ST	X	X	X	X
	P20851	C4b-binding protein beta chain OS=Homo sapiens OX=9606 GN=C4BPB PE=1 SV=1	C4BPB	X	X	X	X
	P07359	Platelet glycoprotein Ib alpha chain OS=Homo sapiens OX=9606 GN=GP1BA PE=1 SV=2	GP1BA	X	X	X	X
	Q16610-3	Isoform 3 of Extracellular matrix protein 1 OS=Homo sapiens OX=9606 GN=ECM1	ECM1				X
	P00491	Purine nucleoside phosphorylase OS=Homo sapiens OX=9606 GN=PNP PE=1 SV=2	PNP		X	X	X
	P11226	Mannose-binding protein C OS=Homo sapiens OX=9606 GN=MBL2 PE=1 SV=2	MBL2	X	X	X	X
	P01591	Immunoglobulin J chain OS=Homo sapiens OX=9606 GN=JCHAIN PE=1 SV=4	JCHAIN	X	X	X	X
	P07737	Profilin-1 OS=Homo sapiens OX=9606 GN=PFN1 PE=1 SV=2	PFN1	X	X	X	X
	P0DJI8	Serum amyloid A-1 protein OS=Homo sapiens OX=9606 GN=SAA1 PE=1 SV=1	SAA1	X	X
	Q15113	Procollagen C-endopeptidase enhancer 1 OS=Homo sapiens OX=9606 GN=PCOLCE PE=1 SV=2	PCOLCE	X	X	X	X
	P30740	Leukocyte elastase inhibitor OS=Homo sapiens OX=9606 GN=SERPINB1 PE=1 SV=1	SERPINB1		X	X	X
	Q9NPH3	Interleukin-1 receptor accessory protein OS=Homo sapiens OX=9606 GN=IL1RAP PE=1 SV=2	IL1RAP	X	X	X	X
	A1L4H1	Soluble scavenger receptor cysteine-rich domain-containing protein SSC5D OS=Homo sapiens OX=9606 GN=SSC5D PE=1 SV=3	SSC5D				X
	P67936-2	Isoform 2 of Tropomyosin alpha-4 chain OS=Homo sapiens OX=9606 GN=TPM4	TPM4			X	X
	P05362	Intercellular adhesion molecule 1 OS=Homo sapiens OX=9606 GN=ICAM1 PE=1 SV=2	ICAM1	X	X	X	X
	Q04721	Neurogenic locus notch homolog protein 2 OS=Homo sapiens OX=9606 GN=NOTCH2 PE=1 SV=3	NOTCH2				X
	Q8IWV2	Contactin-4 OS=Homo sapiens OX=9606 GN=CNTN4 PE=1 SV=1	CNTN4			X	X
	P36980	Complement factor H-related protein 2 OS=Homo sapiens OX=9606 GN=CFHR2 PE=1 SV=1	CFHR2	X	X	X	X
	Q13228	Methanethiol oxidase OS=Homo sapiens OX=9606 GN=SELENBP1 PE=1 SV=2	SELENBP1		X	X	X
	Q8NBP7	Proprotein convertase subtilisin/kexin type 9 OS=Homo sapiens OX=9606 GN=PCSK9 PE=1 SV=3	PCSK9	X	X	X	X
	Q7Z7G0	Target of Nesh-SH3 OS=Homo sapiens OX=9606 GN=ABI3BP PE=1 SV=1	ABI3BP	X	X	X	X
	P00558	Phosphoglycerate kinase 1 OS=Homo sapiens OX=9606 GN=PGK1 PE=1 SV=3	PGK1	X	X	X	X
	P01034	Cystatin-C OS=Homo sapiens OX=9606 GN=CST3 PE=1 SV=1	CST3	X	X	X	X
	P35542	Serum amyloid A-4 protein OS=Homo sapiens OX=9606 GN=SAA4 PE=1 SV=2	SAA4	X	X	X	X
	P68363	Tubulin alpha-1B chain OS=Homo sapiens OX=9606 GN=TUBA1B PE=1 SV=1	TUBA1B	X	X	X	X
	Q9Y4L1	Hypoxia up-regulated protein 1 OS=Homo sapiens OX=9606 GN=HYOU1 PE=1 SV=1	HYOU1		X	X	X
	P12109	Collagen alpha-1(VI) chain OS=Homo sapiens OX=9606 GN=COL6A1 PE=1 SV=3	COL6A1		X	X	X
	P08567	Pleckstrin OS=Homo sapiens OX=9606 GN=PLEK PE=1 SV=3	PLEK	X	X	X	X
	P07858	Cathepsin B OS=Homo sapiens OX=9606 GN=CTSB PE=1 SV=3	CTSB		X	X	X
	O15394	Neural cell adhesion molecule 2 OS=Homo sapiens OX=9606 GN=NCAM2 PE=1 SV=2	NCAM2			X	X
	P06753-2	Isoform 2 of Tropomyosin alpha-3 chain OS=Homo sapiens OX=9606 GN=TPM3	TPM3	X	X	X	X
	Q01518	Adenylyl cyclase-associated protein 1 OS=Homo sapiens OX=9606 GN=CAP1 PE=1 SV=5	CAP1	X	X	X	X
	P00441	Superoxide dismutase [Cu-Zn] OS=Homo sapiens OX=9606 GN=SOD1 PE=1 SV=2	SOD1		X	X	X
	P17174	Aspartate aminotransferase, cytoplasmic OS=Homo sapiens OX=9606 GN=GOT1 PE=1 SV=3	GOT1			X	X
	P31946	14-3-3 protein beta/alpha OS=Homo sapiens OX=9606 GN=YWHAB PE=1 SV=3	YWHAB		X	X	X
	P14543	Nidogen-1 OS=Homo sapiens OX=9606 GN=NID1 PE=1 SV=3	NID1		X	X	X
	P0DJI9	Serum amyloid A-2 protein OS=Homo sapiens OX=9606 GN=SAA2 PE=1 SV=1	SAA2	X
	P15924	Desmoplakin OS=Homo sapiens OX=9606 GN=DSP PE=1 SV=3	DSP		X	X	X
	P14314	Glucosidase 2 subunit beta OS=Homo sapiens OX=9606 GN=PRKCSH PE=1 SV=2	PRKCSH			X	X
	P07333	Macrophage colony-stimulating factor 1 receptor OS=Homo sapiens OX=9606 GN=CSF1R PE=1 SV=2	CSF1R	X	X	X	X
	P02786	Transferrin receptor protein 1 OS=Homo sapiens OX=9606 GN=TFRC PE=1 SV=2	TFRC	X	X	X	X
	Q14315	Filamin-C OS=Homo sapiens OX=9606 GN=FLNC PE=1 SV=3	FLNC		X		X
	Q6UX71	Plexin domain-containing protein 2 OS=Homo sapiens OX=9606 GN=PLXDC2 PE=1 SV=1	PLXDC2	X	X	X	X
	P49908	Selenoprotein P OS=Homo sapiens OX=9606 GN=SELENOP PE=1 SV=3	SELENOP	X	X	X	X
	Q9H4B7	Tubulin beta-1 chain OS=Homo sapiens OX=9606 GN=TUBB1 PE=1 SV=1	TUBB1	X	X	X	X
	P30043	Flavin reductase (NADPH) OS=Homo sapiens OX=9606 GN=BLVRB PE=1 SV=3	BLVRB	X	X	X	X
	P07911	Uromodulin OS=Homo sapiens OX=9606 GN=UMOD PE=1 SV=1	UMOD			X	X
	P07339	Cathepsin D OS=Homo sapiens OX=9606 GN=CTSD PE=1 SV=1	CTSD	X	X	X	X
	Q04917	14-3-3 protein eta OS=Homo sapiens OX=9606 GN=YWHAH PE=1 SV=4	YWHAH		X	X	X
	P55290	Cadherin-13 OS=Homo sapiens OX=9606 GN=CDH13 PE=1 SV=1	CDH13	X	X	X	X
	A0A0C4DH31	Immunoglobulin heavy variable 1-18 OS=Homo sapiens OX=9606 GN=IGHV1-18 PE=3 SV=1	IGHV1-18	X	X
	Q9NZK5	Adenosine deaminase 2 OS=Homo sapiens OX=9606 GN=ADA2 PE=1 SV=2	ADA2		X	X	X
	P52566	Rho GDP-dissociation inhibitor 2 OS=Homo sapiens OX=9606 GN=ARHGDIB PE=1 SV=3	ARHGDIB	X	X	X	X
	P01768	Immunoglobulin heavy variable 3-30 OS=Homo sapiens OX=9606 GN=IGHV3-30 PE=1 SV=2	IGHV3-30	X	X
	P05556	Integrin beta-1 OS=Homo sapiens OX=9606 GN=ITGB1 PE=1 SV=2	ITGB1	X	X	X	X
	P11047	Laminin subunit gamma-1 OS=Homo sapiens OX=9606 GN=LAMC1 PE=1 SV=3	LAMC1				X
	P27348	14-3-3 protein theta OS=Homo sapiens OX=9606 GN=YWHAQ PE=1 SV=1	YWHAQ		X	X	X
	P15151	Poliovirus receptor OS=Homo sapiens OX=9606 GN=PVR PE=1 SV=2	PVR		X	X	X
	Q9NY33	Dipeptidyl peptidase 3 OS=Homo sapiens OX=9606 GN=DPP3 PE=1 SV=2	DPP3			X	X
	P06702	Protein S100-A9 OS=Homo sapiens OX=9606 GN=S100A9 PE=1 SV=1	S100A9	X	X	X	X
	O95980	Reversion-inducing cysteine-rich protein with Kazal motifs OS=Homo sapiens OX=9606 GN=RECK PE=1 SV=1	RECK				X
	P16109	P-selectin OS=Homo sapiens OX=9606 GN=SELP PE=1 SV=3	SELP		X		X
	Q16706	Alpha-mannosidase 2 OS=Homo sapiens OX=9606 GN=MAN2A1 PE=1 SV=2	MAN2A1	X	X	X	X
	Q13740	CD166 antigen OS=Homo sapiens OX=9606 GN=ALCAM PE=1 SV=2	ALCAM		X	X	X
	P29401	Transketolase OS=Homo sapiens OX=9606 GN=TKT PE=1 SV=3	TKT		X	X	X
	Q15848	Adiponectin OS=Homo sapiens OX=9606 GN=ADIPOQ PE=1 SV=1	ADIPOQ	X	X	X	X
	Q96S96	Phosphatidylethanolamine-binding protein 4 OS=Homo sapiens OX=9606 GN=PEBP4 PE=1 SV=3	PEBP4	X	X	X	X
	P07686	Beta-hexosaminidase subunit beta OS=Homo sapiens OX=9606 GN=HEXB PE=1 SV=3	HEXB				X
	Q8N6C8	Leukocyte immunoglobulin-like receptor subfamily A member 3 OS=Homo sapiens OX=9606 GN=LILRA3 PE=1 SV=3	LILRA3		X	X	X
	P30086	Phosphatidylethanolamine-binding protein 1 OS=Homo sapiens OX=9606 GN=PEBP1 PE=1 SV=3	PEBP1		X	X	X
	Q14126	Desmoglein-2 OS=Homo sapiens OX=9606 GN=DSG2 PE=1 SV=2	DSG2		X	X	X
	P29508	Serpin B3 OS=Homo sapiens OX=9606 GN=SERPINB3 PE=1 SV=2	SERPINB3				X
	P68366	Tubulin alpha-4A chain OS=Homo sapiens OX=9606 GN=TUBA4A PE=1 SV=1	TUBA4A	X	X	X	X
	A0A0C4DH38	Immunoglobulin heavy variable 5-51 OS=Homo sapiens OX=9606 GN=IGHV5-51 PE=3 SV=1	IGHV5-51	X	X
	P07195	L-lactate dehydrogenase B chain OS=Homo sapiens OX=9606 GN=LDHB PE=1 SV=2	LDHB	X	X	X	X
	O60462	Neuropilin-2 OS=Homo sapiens OX=9606 GN=NRP2 PE=1 SV=3	NRP2		X	X	X
	P06733	Alpha-enolase OS=Homo sapiens OX=9606 GN=ENO1 PE=1 SV=2	ENO1	X	X	X	X
	Q9NZ08	Endoplasmic reticulum aminopeptidase 1 OS=Homo sapiens OX=9606 GN=ERAP1 PE=1 SV=3	ERAP1		X	X	X
	Q9HBI1-3	Isoform 3 of Beta-parvin OS=Homo sapiens OX=9606 GN=PARVB	PARVB		X	X	X
	Q99784	Noelin OS=Homo sapiens OX=9606 GN=OLFM1 PE=1 SV=4	OLFM1	X	X	X	X
	P48637	Glutathione synthetase OS=Homo sapiens OX=9606 GN=GSS PE=1 SV=1	GSS			X	X
	P05062	Fructose-bisphosphate aldolase B OS=Homo sapiens OX=9606 GN=ALDOB PE=1 SV=2	ALDOB	X	X	X	X
	P0DP04	Immunoglobulin heavy variable 3-43D OS=Homo sapiens OX=9606 GN=IGHV3-43D PE=3 SV=1	IGHV3-43D	X	X		X
	P78386	Keratin, type II cuticular Hb5 OS=Homo sapiens OX=9606 GN=KRT85 PE=1 SV=1	KRT85			X
	O95445-2	Isoform 2 of Apolipoprotein M OS=Homo sapiens OX=9606 GN=APOM	APOM		X
	P78385	Keratin, type II cuticular Hb3 OS=Homo sapiens OX=9606 GN=KRT83 PE=1 SV=2	KRT83			X
	P48594	Serpin B4 OS=Homo sapiens OX=9606 GN=SERPINB4 PE=1 SV=2	SERPINB4				X
	Q9UBW5	Bridging integrator 2 OS=Homo sapiens OX=9606 GN=BIN2 PE=1 SV=3	BIN2		X	X	X
	Q562R1	Beta-actin-like protein 2 OS=Homo sapiens OX=9606 GN=ACTBL2 PE=1 SV=2	ACTBL2			X
	P23528	Cofilin-1 OS=Homo sapiens OX=9606 GN=CFL1 PE=1 SV=3	CFL1	X	X	X	X
	Q9ULI3	Protein HEG homolog 1 OS=Homo sapiens OX=9606 GN=HEG1 PE=1 SV=3	HEG1	X	X	X	X
	Q15404	Ras suppressor protein 1 OS=Homo sapiens OX=9606 GN=RSU1 PE=1 SV=3	RSU1	X	X	X	X
	P14151	L-selectin OS=Homo sapiens OX=9606 GN=SELL PE=1 SV=2	SELL	X	X	X	X
	P23083	Immunoglobulin heavy variable 1-2 OS=Homo sapiens OX=9606 GN=IGHV1-2 PE=1 SV=2	IGHV1-2	X
	Q92823	Neuronal cell adhesion molecule OS=Homo sapiens OX=9606 GN=NRCAM PE=1 SV=3	NRCAM			X	X
	P0DMV9	Heat shock 70 kDa protein 1B OS=Homo sapiens OX=9606 GN=HSPA1B PE=1 SV=1	HSPA1B	X	X	X	X
	Q8IZF2	Adhesion G protein-coupled receptor F5 OS=Homo sapiens OX=9606 GN=ADGRF5 PE=1 SV=3	ADGRF5	X	X	X	X
	O95810	Caveolae-associated protein 2 OS=Homo sapiens OX=9606 GN=CAVIN2 PE=1 SV=3	CAVIN2	X	X	X	X
	Q15323	Keratin, type I cuticular Ha1 OS=Homo sapiens OX=9606 GN=KRT31 PE=1 SV=3	KRT31			X
	Q04695	Keratin, type I cytoskeletal 17 OS=Homo sapiens OX=9606 GN=KRT17 PE=1 SV=2	KRT17			X	X
	Q02413	Desmoglein-1 OS=Homo sapiens OX=9606 GN=DSG1 PE=1 SV=2	DSG1	X	X	X	X
	O00299	Chloride intracellular channel protein 1 OS=Homo sapiens OX=9606 GN=CLIC1 PE=1 SV=4	CLIC1		X	X	X
	P62937	Peptidyl-prolyl cis-trans isomerase A OS=Homo sapiens OX=9606 GN=PPIA PE=1 SV=2	PPIA	X	X	X	X
	Q99497	Protein/nucleic acid deglycase DJ-1 OS=Homo sapiens OX=9606 GN=PARK7 PE=1 SV=2	PARK7	X	X	X	X
	Q9UNW1	Multiple inositol polyphosphate phosphatase 1 OS=Homo sapiens OX=9606 GN=MINPP1 PE=1 SV=1	MINPP1		X	X	X
	P39060	Collagen alpha-1(XVIII) chain OS=Homo sapiens OX=9606 GN=COL18A1 PE=1 SV=5	COL18A1	X	X	X	X
	P09493-5	Isoform 5 of Tropomyosin alpha-1 chain OS=Homo sapiens OX=9606 GN=TPM1	TPM1	X	X	X	X
	P09493-8	Isoform 8 of Tropomyosin alpha-1 chain OS=Homo sapiens OX=9606 GN=TPM1	TPM1	X	X	X	X
	P09972	Fructose-bisphosphate aldolase C OS=Homo sapiens OX=9606 GN=ALDOC PE=1 SV=2	ALDOC		X	X	X
	P01742	Immunoglobulin heavy variable 1-69 OS=Homo sapiens OX=9606 GN=IGHV1-69 PE=1 SV=2	IGHV1-69	X	X
	P04066	Tissue alpha-L-fucosidase OS=Homo sapiens OX=9606 GN=FUCA1 PE=1 SV=4	FUCA1		X	X	X
	O95678	Keratin, type II cytoskeletal 75 OS=Homo sapiens OX=9606 GN=KRT75 PE=1 SV=2	KRT75			X
	Q9NPY3	Complement component C1q receptor OS=Homo sapiens OX=9606 GN=CD93 PE=1 SV=3	CD93			X	X
	P78417	Glutathione S-transferase omega-1 OS=Homo sapiens OX=9606 GN=GSTO1 PE=1 SV=2	GSTO1	X	X	X	X
	Q6P179	Endoplasmic reticulum aminopeptidase 2 OS=Homo sapiens OX=9606 GN=ERAP2 PE=1 SV=2	ERAP2			X	X
	P01833	Polymeric immunoglobulin receptor OS=Homo sapiens OX=9606 GN=PIGR PE=1 SV=4	PIGR	X	X		X
	P16070	CD44 antigen OS=Homo sapiens OX=9606 GN=CD44 PE=1 SV=3	CD44	X	X	X	X
	P13797	Plastin-3 OS=Homo sapiens OX=9606 GN=PLS3 PE=1 SV=4	PLS3				X
	P02652	Apolipoprotein A-II OS=Homo sapiens OX=9606 GN=APOA2 PE=1 SV=1	APOA2	X	X	X	X
	P35590	Tyrosine-protein kinase receptor Tie-1 OS=Homo sapiens OX=9606 GN=TIE1 PE=1 SV=1	TIE1			X	X
	A0A0B4J1Y9	Immunoglobulin heavy variable 3-72 OS=Homo sapiens OX=9606 GN=IGHV3-72 PE=3 SV=1	IGHV3-72	X	X
	P07900	Heat shock protein HSP 90-alpha OS=Homo sapiens OX=9606 GN=HSP90AA1 PE=1 SV=5	HSP90AA1		X	X	X
	P07951-2	Isoform 2 of Tropomyosin beta chain OS=Homo sapiens OX=9606 GN=TPM2	TPM2		X	X	X
	P08581	Hepatocyte growth factor receptor OS=Homo sapiens OX=9606 GN=MET PE=1 SV=4	MET		X	X	X
	O15031	Plexin-B2 OS=Homo sapiens OX=9606 GN=PLXNB2 PE=1 SV=3	PLXNB2				X
	Q14118	Dystroglycan OS=Homo sapiens OX=9606 GN=DAG1 PE=1 SV=2	DAG1			X	X
	A0A075B6P5	Immunoglobulin kappa variable 2-28 OS=Homo sapiens OX=9606 GN=IGKV2-28 PE=3 SV=1	IGKV2-28	X	X
	P12830	Cadherin-1 OS=Homo sapiens OX=9606 GN=CDH1 PE=1 SV=3	CDH1	X	X	X	X
	O43157	Plexin-B1 OS=Homo sapiens OX=9606 GN=PLXNB1 PE=1 SV=3	PLXNB1			X	X
	P20023-3	Isoform C of Complement receptor type 2 OS=Homo sapiens OX=9606 GN=CR2	CR2		X	X	X
	A6NCN2	Putative keratin-87 protein OS=Homo sapiens OX=9606 GN=KRT87P PE=5 SV=4	KRT87P			X
	P10721	Mast/stem cell growth factor receptor Kit OS=Homo sapiens OX=9606 GN=KIT PE=1 SV=1	KIT		X	X	X
	P10153	Non-secretory ribonuclease OS=Homo sapiens OX=9606 GN=RNASE2 PE=1 SV=2	RNASE2				X
	P05106	Integrin beta-3 OS=Homo sapiens OX=9606 GN=ITGB3 PE=1 SV=2	ITGB3	X
	P02655	Apolipoprotein C-II OS=Homo sapiens OX=9606 GN=APOC2 PE=1 SV=1	APOC2	X	X	X	X
	P37837	Transaldolase OS=Homo sapiens OX=9606 GN=TALDO1 PE=1 SV=2	TALDO1		X	X	X
	P02775	Platelet basic protein OS=Homo sapiens OX=9606 GN=PPBP PE=1 SV=3	PPBP	X	X	X	X
	P01767	Immunoglobulin heavy variable 3-53 OS=Homo sapiens OX=9606 GN=IGHV3-53 PE=1 SV=2	IGHV3-53	X	X
	P36222	Chitinase-3-like protein 1 OS=Homo sapiens OX=9606 GN=CHI3L1 PE=1 SV=2	CHI3L1			X	X
	Q05682-4	Isoform 4 of Caldesmon OS=Homo sapiens OX=9606 GN=CALD1	CALD1			X	X
	A0A087WW87	Immunoglobulin kappa variable 2-40 OS=Homo sapiens OX=9606 GN=IGKV2-40 PE=3 SV=2	IGKV2-40	X
	P01764	Immunoglobulin heavy variable 3-23 OS=Homo sapiens OX=9606 GN=IGHV3-23 PE=1 SV=2	IGHV3-23	X
	Q9BY67	Cell adhesion molecule 1 OS=Homo sapiens OX=9606 GN=CADM1 PE=1 SV=2	CADM1		X	X	X
	P00338	L-lactate dehydrogenase A chain OS=Homo sapiens OX=9606 GN=LDHA PE=1 SV=2	LDHA	X	X	X	X
	P13688	Carcinoembryonic antigen-related cell adhesion molecule 1 OS=Homo sapiens OX=9606 GN=CEACAM1 PE=1 SV=2	CEACAM1			X	X
	P18669	Phosphoglycerate mutase 1 OS=Homo sapiens OX=9606 GN=PGAM1 PE=1 SV=2	PGAM1		X	X	X
	P19022	Cadherin-2 OS=Homo sapiens OX=9606 GN=CDH2 PE=1 SV=4	CDH2			X	X
	Q9BTY2	Plasma alpha-L-fucosidase OS=Homo sapiens OX=9606 GN=FUCA2 PE=1 SV=2	FUCA2		X	X	X
	P09619	Platelet-derived growth factor receptor beta OS=Homo sapiens OX=9606 GN=PDGFRB PE=1 SV=1	PDGFRB			X	X
	Q13093	Platelet-activating factor acetylhydrolase OS=Homo sapiens OX=9606 GN=PLA2G7 PE=1 SV=1	PLA2G7	X	X	X
	P05090	Apolipoprotein D OS=Homo sapiens OX=9606 GN=APOD PE=1 SV=1	APOD	X	X		X
	A0A0C4DH29	Immunoglobulin heavy variable 1-3 OS=Homo sapiens OX=9606 GN=IGHV1-3 PE=3 SV=1	IGHV1-3	X
	A0M8Q6	Immunoglobulin lambda constant 7 OS=Homo sapiens OX=9606 GN=IGLC7 PE=1 SV=3	IGLC7	X	X
	P01743	Immunoglobulin heavy variable 1-46 OS=Homo sapiens OX=9606 GN=IGHV1-46 PE=1 SV=2	IGHV1-46	X	X
	Q9UNN8	Endothelial protein C receptor OS=Homo sapiens OX=9606 GN=PROCR PE=1 SV=1	PROCR	X	X	X	X
	P01619	Immunoglobulin kappa variable 3-20 OS=Homo sapiens OX=9606 GN=IGKV3-20 PE=1 SV=2	IGKV3-20	X	X
	P78324	Tyrosine-protein phosphatase non-receptor type substrate 1 OS=Homo sapiens OX=9606 GN=SIRPA PE=1 SV=2	SIRPA			X	X
	O75144	ICOS ligand OS=Homo sapiens OX=9606 GN=ICOSLG PE=1 SV=2	ICOSLG	X	X	X	X
	P01721	Immunoglobulin lambda variable 6-57 OS=Homo sapiens OX=9606 GN=IGLV6-57 PE=1 SV=2	IGLV6-57	X	X
	P08253	72 kDa type IV collagenase OS=Homo sapiens OX=9606 GN=MMP2 PE=1 SV=2	MMP2		X	X	X
	Q5TFQ8	Signal-regulatory protein beta-1 isoform 3 OS=Homo sapiens OX=9606 GN=SIRPB1 PE=1 SV=1	SIRPB1				X
	A0A0C4DH33	Immunoglobulin heavy variable 1-24 OS=Homo sapiens OX=9606 GN=IGHV1-24 PE=3 SV=1	IGHV1-24	X
	P16112-2	Isoform 2 of Aggrecan core protein OS=Homo sapiens OX=9606 GN=ACAN	ACAN				X
	P31944	Caspase-14 OS=Homo sapiens OX=9606 GN=CASP14 PE=1 SV=2	CASP14	X	X	X	X
	P01780	Immunoglobulin heavy variable 3-7 OS=Homo sapiens OX=9606 GN=IGHV3-7 PE=1 SV=2	IGHV3-7	X	X
	P08514	Integrin alpha-IIb OS=Homo sapiens OX=9606 GN=ITGA2B PE=1 SV=3	ITGA2B	X	X
	P07738	Bisphosphoglycerate mutase OS=Homo sapiens OX=9606 GN=BPGM PE=1 SV=2	BPGM		X	X	X
	P30041	Peroxiredoxin-6 OS=Homo sapiens OX=9606 GN=PRDX6 PE=1 SV=3	PRDX6		X	X	X
	P04179	Superoxide dismutase [Mn], mitochondrial OS=Homo sapiens OX=9606 GN=SOD2 PE=1 SV=3	SOD2		X	X	X
	Q13449	Limbic system-associated membrane protein OS=Homo sapiens OX=9606 GN=LSAMP PE=1 SV=2	LSAMP		X	X	X
	A0A0B4J1X5	Immunoglobulin heavy variable 3-74 OS=Homo sapiens OX=9606 GN=IGHV3-74 PE=3 SV=1	IGHV3-74	X
	P06753	Tropomyosin alpha-3 chain OS=Homo sapiens OX=9606 GN=TPM3 PE=1 SV=2	TPM3			X	X
	Q9Y5C1	Angiopoietin-related protein 3 OS=Homo sapiens OX=9606 GN=ANGPTL3 PE=1 SV=1	ANGPTL3		X	X	X
	Q14525	Keratin, type I cuticular Ha3-II OS=Homo sapiens OX=9606 GN=KRT33B PE=1 SV=3	KRT33B			X
	Q8NBS9	Thioredoxin domain-containing protein 5 OS=Homo sapiens OX=9606 GN=TXNDC5 PE=1 SV=2	TXNDC5			X	X
	P30530	Tyrosine-protein kinase receptor UFO OS=Homo sapiens OX=9606 GN=AXL PE=1 SV=4	AXL		X	X	X
	P08758	Annexin A5 OS=Homo sapiens OX=9606 GN=ANXA5 PE=1 SV=2	ANXA5			X	X
	P41222	Prostaglandin-H2 D-isomerase OS=Homo sapiens OX=9606 GN=PTGDS PE=1 SV=1	PTGDS	X	X	X	X
	P09211	Glutathione S-transferase P OS=Homo sapiens OX=9606 GN=GSTP1 PE=1 SV=2	GSTP1		X	X	X
	P61158	Actin-related protein 3 OS=Homo sapiens OX=9606 GN=ACTR3 PE=1 SV=3	ACTR3		X	X	X
	P08123	Collagen alpha-2(I) chain OS=Homo sapiens OX=9606 GN=COL1A2 PE=1 SV=7	COL1A2	X			X
	P11597	Cholesteryl ester transfer protein OS=Homo sapiens OX=9606 GN=CETP PE=1 SV=2	CETP	X	X	X	X
	Q6UVK1	Chondroitin sulfate proteoglycan 4 OS=Homo sapiens OX=9606 GN=CSPG4 PE=1 SV=2	CSPG4				X
	P05451	Lithostathine-1-alpha OS=Homo sapiens OX=9606 GN=REG1A PE=1 SV=3	REG1A			X	X
	Q9H299	SH3 domain-binding glutamic acid-rich-like protein 3 OS=Homo sapiens OX=9606 GN=SH3BGRL3 PE=1 SV=1	SH3BGRL3	X	X	X	X
	Q02985	Complement factor H-related protein 3 OS=Homo sapiens OX=9606 GN=CFHR3 PE=1 SV=2	CFHR3	X	X
	P02452	Collagen alpha-1(I) chain OS=Homo sapiens OX=9606 GN=COL1A1 PE=1 SV=5	COL1A1	X	X	X	X
	Q9HDC9	Adipocyte plasma membrane-associated protein OS=Homo sapiens OX=9606 GN=APMAP PE=1 SV=2	APMAP	X	X		X
	P24592	Insulin-like growth factor-binding protein 6 OS=Homo sapiens OX=9606 GN=IGFBP6 PE=1 SV=1	IGFBP6	X	X	X	X
	P26992	Ciliary neurotrophic factor receptor subunit alpha OS=Homo sapiens OX=9606 GN=CNTFR PE=1 SV=2	CNTFR		X	X	X
	P14923	Junction plakoglobin OS=Homo sapiens OX=9606 GN=JUP PE=1 SV=3	JUP			X	X
	P55056	Apolipoprotein C-IV OS=Homo sapiens OX=9606 GN=APOC4 PE=1 SV=1	APOC4	X	X	X	X
	P20933	N(4)-(beta-N-acetylglucosaminyl)-L-asparaginase OS=Homo sapiens OX=9606 GN=AGA PE=1 SV=2	AGA				X
	P06331	Immunoglobulin heavy variable 4-34 OS=Homo sapiens OX=9606 GN=IGHV4-34 PE=1 SV=2	IGHV4-34	X	X
	Q9ULV4	Coronin-1C OS=Homo sapiens OX=9606 GN=CORO1C PE=1 SV=1	CORO1C	X	X	X	X
	P50552	Vasodilator-stimulated phosphoprotein OS=Homo sapiens OX=9606 GN=VASP PE=1 SV=3	VASP		X	X	X
	P07998	Ribonuclease pancreatic OS=Homo sapiens OX=9606 GN=RNASE1 PE=1 SV=4	RNASE1	X	X		X
	Q8IXL6	Extracellular serine/threonine protein kinase FAM20C OS=Homo sapiens OX=9606 GN=FAM20C PE=1 SV=2	FAM20C			X	X
	Q9Y646	Carboxypeptidase Q OS=Homo sapiens OX=9606 GN=CPQ PE=1 SV=1	CPQ		X	X	X
	P61769	Beta-2-microglobulin OS=Homo sapiens OX=9606 GN=B2M PE=1 SV=1	B2M	X	X	X	X
	P0DP08	Immunoglobulin heavy variable 4-38-2 OS=Homo sapiens OX=9606 GN=IGHV4-38-2 PE=3 SV=1	IGHV4-38-2	X
	P01706	Immunoglobulin lambda variable 2-11 OS=Homo sapiens OX=9606 GN=IGLV2-11 PE=1 SV=2	IGLV2-11	X	X
	Q9BYE9	Cadherin-related family member 2 OS=Homo sapiens OX=9606 GN=CDHR2 PE=1 SV=2	CDHR2			X	X
	P52565	Rho GDP-dissociation inhibitor 1 OS=Homo sapiens OX=9606 GN=ARHGDIA PE=1 SV=3	ARHGDIA		X	X	X
	Q13790	Apolipoprotein F OS=Homo sapiens OX=9606 GN=APOF PE=1 SV=2	APOF	X	X		X
	A0A075B6K4	Immunoglobulin lambda variable 3-10 OS=Homo sapiens OX=9606 GN=IGLV3-10 PE=3 SV=2	IGLV3-10	X	X
	P02654	Apolipoprotein C-I OS=Homo sapiens OX=9606 GN=APOC1 PE=1 SV=1	APOC1	X	X	X	X
	P04432	Immunoglobulin kappa variable 1D-39 OS=Homo sapiens OX=9606 GN=IGKV1D-39 PE=3 SV=2	IGKV1D-39	X
	Q9UK23	N-acetylglucosamine-1-phosphodiester alpha-N-acetylglucosaminidase OS=Homo sapiens OX=9606 GN=NAGPA PE=1 SV=2	NAGPA				X
	Q99969	Retinoic acid receptor responder protein 2 OS=Homo sapiens OX=9606 GN=RARRES2 PE=1 SV=1	RARRES2	X	X	X	X
	P10645	Chromogranin-A OS=Homo sapiens OX=9606 GN=CHGA PE=1 SV=7	CHGA			X	X
	Q92764	Keratin, type I cuticular Ha5 OS=Homo sapiens OX=9606 GN=KRT35 PE=2 SV=5	KRT35			X
	P32119	Peroxiredoxin-2 OS=Homo sapiens OX=9606 GN=PRDX2 PE=1 SV=5	PRDX2	X	X	X	X
	P02788	Lactotransferrin OS=Homo sapiens OX=9606 GN=LTF PE=1 SV=6	LTF		X	X	X
	Q86TH1	ADAMTS-like protein 2 OS=Homo sapiens OX=9606 GN=ADAMTSL2 PE=1 SV=1	ADAMTSL2	X	X	X	X
	P61916	NPC intracellular cholesterol transporter 2 OS=Homo sapiens OX=9606 GN=NPC2 PE=1 SV=1	NPC2			X	X
	Q08188	Protein-glutamine gamma-glutamyltransferase E OS=Homo sapiens OX=9606 GN=TGM3 PE=1 SV=4	TGM3		X		X
	P31151	Protein S100-A7 OS=Homo sapiens OX=9606 GN=S100A7 PE=1 SV=4	S100A7		X	X	X
	P80188	Neutrophil gelatinase-associated lipocalin OS=Homo sapiens OX=9606 GN=LCN2 PE=1 SV=2	LCN2			X	X
	P61224	Ras-related protein Rap-1b OS=Homo sapiens OX=9606 GN=RAP1B PE=1 SV=1	RAP1B	X	X	X	X
	P04439	HLA class I histocompatibility antigen, A alpha chain OS=Homo sapiens OX=9606 GN=HLA-A PE=1 SV=2	HLA-A	X	X	X	X
	P54108	Cysteine-rich secretory protein 3 OS=Homo sapiens OX=9606 GN=CRISP3 PE=1 SV=1	CRISP3	X	X	X
	P11362	Fibroblast growth factor receptor 1 OS=Homo sapiens OX=9606 GN=FGFR1 PE=1 SV=3	FGFR1			X	X
	O43895	Xaa-Pro aminopeptidase 2 OS=Homo sapiens OX=9606 GN=XPNPEP2 PE=1 SV=3	XPNPEP2				X
	P17813	Endoglin OS=Homo sapiens OX=9606 GN=ENG PE=1 SV=2	ENG		X	X	X
	P01599	Immunoglobulin kappa variable 1-17 OS=Homo sapiens OX=9606 GN=IGKV1-17 PE=1 SV=2	IGKV1-17	X
	A0A0C4DH73	Immunoglobulin kappa variable 1-12 OS=Homo sapiens OX=9606 GN=IGKV1-12 PE=3 SV=1	IGKV1-12	X
	P07355	Annexin A2 OS=Homo sapiens OX=9606 GN=ANXA2 PE=1 SV=2	ANXA2		X	X	X
	Q16851-2	Isoform 2 of UTP--glucose-1-phosphate uridylyltransferase OS=Homo sapiens OX=9606 GN=UGP2	UGP2			X	X
	P13646	Keratin, type I cytoskeletal 13 OS=Homo sapiens OX=9606 GN=KRT13 PE=1 SV=4	KRT13	X
	Q9HBB8	Cadherin-related family member 5 OS=Homo sapiens OX=9606 GN=CDHR5 PE=1 SV=3	CDHR5		X	X	X
	O43280	Trehalase OS=Homo sapiens OX=9606 GN=TREH PE=1 SV=2	TREH				X
	P13598	Intercellular adhesion molecule 2 OS=Homo sapiens OX=9606 GN=ICAM2 PE=1 SV=2	ICAM2	X	X	X	X
	Q16270	Insulin-like growth factor-binding protein 7 OS=Homo sapiens OX=9606 GN=IGFBP7 PE=1 SV=1	IGFBP7		X	X	X
	P0DP01	Immunoglobulin heavy variable 1-8 OS=Homo sapiens OX=9606 GN=IGHV1-8 PE=3 SV=1	IGHV1-8	X
	O43852	Calumenin OS=Homo sapiens OX=9606 GN=CALU PE=1 SV=2	CALU			X	X
	Q7Z794	Keratin, type II cytoskeletal 1b OS=Homo sapiens OX=9606 GN=KRT77 PE=2 SV=3	KRT77			X	X
	P08174	Complement decay-accelerating factor OS=Homo sapiens OX=9606 GN=CD55 PE=1 SV=4	CD55			X	X
	P01889	HLA class I histocompatibility antigen, B alpha chain OS=Homo sapiens OX=9606 GN=HLA-B PE=1 SV=3	HLA-B		X		X
	P19021	Peptidyl-glycine alpha-amidating monooxygenase OS=Homo sapiens OX=9606 GN=PAM PE=1 SV=2	PAM		X	X	X
	O43493	Trans-Golgi network integral membrane protein 2 OS=Homo sapiens OX=9606 GN=TGOLN2 PE=1 SV=4	TGOLN2		X	X	X
	Q12907	Vesicular integral-membrane protein VIP36 OS=Homo sapiens OX=9606 GN=LMAN2 PE=1 SV=1	LMAN2			X	X
	P55072	Transitional endoplasmic reticulum ATPase OS=Homo sapiens OX=9606 GN=VCP PE=1 SV=4	VCP			X	X
	A0A0B4J1V6	Immunoglobulin heavy variable 3-73 OS=Homo sapiens OX=9606 GN=IGHV3-73 PE=3 SV=1	IGHV3-73	X	X
	A0A0B4J1U7	Immunoglobulin heavy variable 6-1 OS=Homo sapiens OX=9606 GN=IGHV6-1 PE=3 SV=1	IGHV6-1	X	X
	Q13103	Secreted phosphoprotein 24 OS=Homo sapiens OX=9606 GN=SPP2 PE=1 SV=1	SPP2	X	X	X	X
	P18065	Insulin-like growth factor-binding protein 2 OS=Homo sapiens OX=9606 GN=IGFBP2 PE=1 SV=2	IGFBP2	X	X	X	X
	P22304	Iduronate 2-sulfatase OS=Homo sapiens OX=9606 GN=IDS PE=1 SV=1	IDS			X	X
	Q14019	Coactosin-like protein OS=Homo sapiens OX=9606 GN=COTL1 PE=1 SV=3	COTL1	X	X	X	X
	Q8WZ75	Roundabout homolog 4 OS=Homo sapiens OX=9606 GN=ROBO4 PE=1 SV=1	ROBO4		X	X	X
	A0A075B6S5	Immunoglobulin kappa variable 1-27 OS=Homo sapiens OX=9606 GN=IGKV1-27 PE=3 SV=1	IGKV1-27	X
	Q3ZCW2	Galectin-related protein OS=Homo sapiens OX=9606 GN=LGALSL PE=1 SV=2	LGALSL	X	X	X	X
	P40925	Malate dehydrogenase, cytoplasmic OS=Homo sapiens OX=9606 GN=MDH1 PE=1 SV=4	MDH1		X	X	X
	P01714	Immunoglobulin lambda variable 3-19 OS=Homo sapiens OX=9606 GN=IGLV3-19 PE=1 SV=2	IGLV3-19	X	X
	Q9H1U4	Multiple epidermal growth factor-like domains protein 9 OS=Homo sapiens OX=9606 GN=MEGF9 PE=2 SV=3	MEGF9				X
	A0A075B6R2	Immunoglobulin heavy variable 4-4 OS=Homo sapiens OX=9606 GN=IGHV4-4 PE=3 SV=2	IGHV4-4	X	X
	P46531	Neurogenic locus notch homolog protein 1 OS=Homo sapiens OX=9606 GN=NOTCH1 PE=1 SV=4	NOTCH1				X
	O00584	Ribonuclease T2 OS=Homo sapiens OX=9606 GN=RNASET2 PE=1 SV=2	RNASET2			X	X
	P10321	HLA class I histocompatibility antigen, C alpha chain OS=Homo sapiens OX=9606 GN=HLA-C PE=1 SV=3	HLA-C				X
	Q8N149	Leukocyte immunoglobulin-like receptor subfamily A member 2 OS=Homo sapiens OX=9606 GN=LILRA2 PE=1 SV=2	LILRA2			X	X
	P01130	Low-density lipoprotein receptor OS=Homo sapiens OX=9606 GN=LDLR PE=1 SV=1	LDLR				X
	P01033	Metalloproteinase inhibitor 1 OS=Homo sapiens OX=9606 GN=TIMP1 PE=1 SV=1	TIMP1	X	X	X	X
	Q86UN3	Reticulon-4 receptor-like 2 OS=Homo sapiens OX=9606 GN=RTN4RL2 PE=1 SV=1	RTN4RL2			X	X
	O43505	Beta-1,4-glucuronyltransferase 1 OS=Homo sapiens OX=9606 GN=B4GAT1 PE=1 SV=1	B4GAT1		X	X	X
	P13727	Bone marrow proteoglycan OS=Homo sapiens OX=9606 GN=PRG2 PE=1 SV=2	PRG2	X	X	X	X
	Q8NBJ4	Golgi membrane protein 1 OS=Homo sapiens OX=9606 GN=GOLM1 PE=1 SV=1	GOLM1			X	X
	Q15942	Zyxin OS=Homo sapiens OX=9606 GN=ZYX PE=1 SV=1	ZYX	X	X	X
	Q92496	Complement factor H-related protein 4 OS=Homo sapiens OX=9606 GN=CFHR4 PE=1 SV=3	CFHR4	X	X
	O15144	Actin-related protein 2/3 complex subunit 2 OS=Homo sapiens OX=9606 GN=ARPC2 PE=1 SV=1	ARPC2			X	X
	A0A0C4DH25	Immunoglobulin kappa variable 3D-20 OS=Homo sapiens OX=9606 GN=IGKV3D-20 PE=3 SV=1	IGKV3D-20	X	X
	Q99972	Myocilin OS=Homo sapiens OX=9606 GN=MYOC PE=1 SV=2	MYOC		X	X	X
	Q9NY97	N-acetyllactosaminide beta-1,3-N-acetylglucosaminyltransferase 2 OS=Homo sapiens OX=9606 GN=B3GNT2 PE=1 SV=2	B3GNT2	X	X	X	X
	P78509	Reelin OS=Homo sapiens OX=9606 GN=RELN PE=1 SV=3	RELN		X		X
	P07437	Tubulin beta chain OS=Homo sapiens OX=9606 GN=TUBB PE=1 SV=2	TUBB			X
	P01766	Immunoglobulin heavy variable 3-13 OS=Homo sapiens OX=9606 GN=IGHV3-13 PE=1 SV=2	IGHV3-13	X	X
	P23141	Liver carboxylesterase 1 OS=Homo sapiens OX=9606 GN=CES1 PE=1 SV=2	CES1			X	X
	A0A0C4DH43	Immunoglobulin heavy variable 2-70D OS=Homo sapiens OX=9606 GN=IGHV2-70D PE=3 SV=1	IGHV2-70D	X	X
	P12429	Annexin A3 OS=Homo sapiens OX=9606 GN=ANXA3 PE=1 SV=3	ANXA3				X
	A0A075B6K5	Immunoglobulin lambda variable 3-9 OS=Homo sapiens OX=9606 GN=IGLV3-9 PE=3 SV=1	IGLV3-9	X	X
	P15086	Carboxypeptidase B OS=Homo sapiens OX=9606 GN=CPB1 PE=1 SV=4	CPB1				X
	Q9BWP8	Collectin-11 OS=Homo sapiens OX=9606 GN=COLEC11 PE=1 SV=1	COLEC11	X	X	X	X
	P52209	6-phosphogluconate dehydrogenase, decarboxylating OS=Homo sapiens OX=9606 GN=PGD PE=1 SV=3	PGD		X	X	X
	A0A087WSY6	Immunoglobulin kappa variable 3D-15 OS=Homo sapiens OX=9606 GN=IGKV3D-15 PE=3 SV=6	IGKV3D-15	X	X
	Q13867	Bleomycin hydrolase OS=Homo sapiens OX=9606 GN=BLMH PE=1 SV=1	BLMH		X	X	X
	P02461	Collagen alpha-1(III) chain OS=Homo sapiens OX=9606 GN=COL3A1 PE=1 SV=4	COL3A1				X
	Q6IBS0	Twinfilin-2 OS=Homo sapiens OX=9606 GN=TWF2 PE=1 SV=2	TWF2		X	X	X
	P13716	Delta-aminolevulinic acid dehydratase OS=Homo sapiens OX=9606 GN=ALAD PE=1 SV=1	ALAD			X	X
	P40199	Carcinoembryonic antigen-related cell adhesion molecule 6 OS=Homo sapiens OX=9606 GN=CEACAM6 PE=1 SV=3	CEACAM6				X
	O76013	Keratin, type I cuticular Ha6 OS=Homo sapiens OX=9606 GN=KRT36 PE=2 SV=1	KRT36			X
	Q9UQP3	Tenascin-N OS=Homo sapiens OX=9606 GN=TNN PE=1 SV=2	TNN				X
	Q9UJJ9	N-acetylglucosamine-1-phosphotransferase subunit gamma OS=Homo sapiens OX=9606 GN=GNPTG PE=1 SV=1	GNPTG	X	X	X	X
	O14498	Immunoglobulin superfamily containing leucine-rich repeat protein OS=Homo sapiens OX=9606 GN=ISLR PE=2 SV=1	ISLR			X	X
	P50895	Basal cell adhesion molecule OS=Homo sapiens OX=9606 GN=BCAM PE=1 SV=2	BCAM				X
	P32942	Intercellular adhesion molecule 3 OS=Homo sapiens OX=9606 GN=ICAM3 PE=1 SV=2	ICAM3		X	X	X
	P68371	Tubulin beta-4B chain OS=Homo sapiens OX=9606 GN=TUBB4B PE=1 SV=1	TUBB4B	X
	P01824	Immunoglobulin heavy variable 4-39 OS=Homo sapiens OX=9606 GN=IGHV4-39 PE=1 SV=2	IGHV4-39	X
	Q9UBP4	Dickkopf-related protein 3 OS=Homo sapiens OX=9606 GN=DKK3 PE=1 SV=2	DKK3				X
	Q06830	Peroxiredoxin-1 OS=Homo sapiens OX=9606 GN=PRDX1 PE=1 SV=1	PRDX1	X	X	X	X
	O75326	Semaphorin-7A OS=Homo sapiens OX=9606 GN=SEMA7A PE=1 SV=1	SEMA7A			X	X
	P47756-2	Isoform 2 of F-actin-capping protein subunit beta OS=Homo sapiens OX=9606 GN=CAPZB	CAPZB		X	X	X
	Q15485	Ficolin-2 OS=Homo sapiens OX=9606 GN=FCN2 PE=1 SV=2	FCN2	X
	Q14532	Keratin, type I cuticular Ha2 OS=Homo sapiens OX=9606 GN=KRT32 PE=2 SV=3	KRT32			X
	P06865	Beta-hexosaminidase subunit alpha OS=Homo sapiens OX=9606 GN=HEXA PE=1 SV=2	HEXA			X	X
	Q86U17	Serpin A11 OS=Homo sapiens OX=9606 GN=SERPINA11 PE=2 SV=2	SERPINA11		X	X	X
	Q9UKU6	Thyrotropin-releasing hormone-degrading ectoenzyme OS=Homo sapiens OX=9606 GN=TRHDE PE=2 SV=1	TRHDE				X
	Q02487	Desmocollin-2 OS=Homo sapiens OX=9606 GN=DSC2 PE=1 SV=1	DSC2			X	X
	P06310	Immunoglobulin kappa variable 2-30 OS=Homo sapiens OX=9606 GN=IGKV2-30 PE=3 SV=2	IGKV2-30	X
	Q86SQ4	Adhesion G-protein coupled receptor G6 OS=Homo sapiens OX=9606 GN=ADGRG6 PE=1 SV=3	ADGRG6		X	X	X
	Q8WWZ8	Oncoprotein-induced transcript 3 protein OS=Homo sapiens OX=9606 GN=OIT3 PE=1 SV=2	OIT3	X	X	X	X
	P08575	Receptor-type tyrosine-protein phosphatase C OS=Homo sapiens OX=9606 GN=PTPRC PE=1 SV=3	PTPRC				X
	P61626	Lysozyme C OS=Homo sapiens OX=9606 GN=LYZ PE=1 SV=1	LYZ	X	X	X
	P01700	Immunoglobulin lambda variable 1-47 OS=Homo sapiens OX=9606 GN=IGLV1-47 PE=1 SV=2	IGLV1-47	X	X
	P02776	Platelet factor 4 OS=Homo sapiens OX=9606 GN=PF4 PE=1 SV=2	PF4	X	X	X	X
	Q13508	Ecto-ADP-ribosyltransferase 3 OS=Homo sapiens OX=9606 GN=ART3 PE=1 SV=2	ART3			X	X
	P13473	Lysosome-associated membrane glycoprotein 2 OS=Homo sapiens OX=9606 GN=LAMP2 PE=1 SV=2	LAMP2	X	X	X	X
	Q15084	Protein disulfide-isomerase A6 OS=Homo sapiens OX=9606 GN=PDIA6 PE=1 SV=1	PDIA6		X	X	X
	Q8IUK5	Plexin domain-containing protein 1 OS=Homo sapiens OX=9606 GN=PLXDC1 PE=1 SV=2	PLXDC1			X	X
	Q8N1N4	Keratin, type II cytoskeletal 78 OS=Homo sapiens OX=9606 GN=KRT78 PE=1 SV=2	KRT78	X	X	X	X
	O00462	Beta-mannosidase OS=Homo sapiens OX=9606 GN=MANBA PE=1 SV=3	MANBA			X	X
	P62328	Thymosin beta-4 OS=Homo sapiens OX=9606 GN=TMSB4X PE=1 SV=2	TMSB4X	X	X	X	X
	P01701	Immunoglobulin lambda variable 1-51 OS=Homo sapiens OX=9606 GN=IGLV1-51 PE=1 SV=2	IGLV1-51	X	X
	P07478	Trypsin-2 OS=Homo sapiens OX=9606 GN=PRSS2 PE=1 SV=1	PRSS2				X
	A0A0A0MS15	Immunoglobulin heavy variable 3-49 OS=Homo sapiens OX=9606 GN=IGHV3-49 PE=3 SV=1	IGHV3-49	X	X
	P02656	Apolipoprotein C-III OS=Homo sapiens OX=9606 GN=APOC3 PE=1 SV=1	APOC3	X	X	X	X
	P08238	Heat shock protein HSP 90-beta OS=Homo sapiens OX=9606 GN=HSP90AB1 PE=1 SV=4	HSP90AB1			X
	A0A0J9YXX1	Immunoglobulin heavy variable 5-10-1 OS=Homo sapiens OX=9606 GN=IGHV5-10-1 PE=3 SV=1	IGHV5-10-1	X
	Q9UBR2	Cathepsin Z OS=Homo sapiens OX=9606 GN=CTSZ PE=1 SV=1	CTSZ		X	X	X
	P01703	Immunoglobulin lambda variable 1-40 OS=Homo sapiens OX=9606 GN=IGLV1-40 PE=1 SV=2	IGLV1-40	X	X
	P28827	Receptor-type tyrosine-protein phosphatase mu OS=Homo sapiens OX=9606 GN=PTPRM PE=1 SV=2	PTPRM			X	X
	Q9NZT1	Calmodulin-like protein 5 OS=Homo sapiens OX=9606 GN=CALML5 PE=1 SV=2	CALML5				X
	P07602	Prosaposin OS=Homo sapiens OX=9606 GN=PSAP PE=1 SV=2	PSAP			X	X
	P31146	Coronin-1A OS=Homo sapiens OX=9606 GN=CORO1A PE=1 SV=4	CORO1A		X	X	X
	O75015	Low affinity immunoglobulin gamma Fc region receptor III-B OS=Homo sapiens OX=9606 GN=FCGR3B PE=1 SV=2	FCGR3B	X	X	X	X
	P16284	Platelet endothelial cell adhesion molecule OS=Homo sapiens OX=9606 GN=PECAM1 PE=1 SV=2	PECAM1				X
	Q13308	Inactive tyrosine-protein kinase 7 OS=Homo sapiens OX=9606 GN=PTK7 PE=1 SV=2	PTK7				X
	Q92484	Acid sphingomyelinase-like phosphodiesterase 3a OS=Homo sapiens OX=9606 GN=SMPDL3A PE=1 SV=2	SMPDL3A			X	X
	P01601	Immunoglobulin kappa variable 1D-16 OS=Homo sapiens OX=9606 GN=IGKV1D-16 PE=3 SV=2	IGKV1D-16	X
	Q9NTU7	Cerebellin-4 OS=Homo sapiens OX=9606 GN=CBLN4 PE=1 SV=1	CBLN4			X	X
	Q5D862	Filaggrin-2 OS=Homo sapiens OX=9606 GN=FLG2 PE=1 SV=1	FLG2	X	X		X
	Q08554	Desmocollin-1 OS=Homo sapiens OX=9606 GN=DSC1 PE=1 SV=2	DSC1		X	X	X
	P09960	Leukotriene A-4 hydrolase OS=Homo sapiens OX=9606 GN=LTA4H PE=1 SV=2	LTA4H			X	X
	Q99715	Collagen alpha-1(XII) chain OS=Homo sapiens OX=9606 GN=COL12A1 PE=1 SV=2	COL12A1				X
	P07477	Trypsin-1 OS=Homo sapiens OX=9606 GN=PRSS1 PE=1 SV=1	PRSS1	X	X	X	X
	P34096	Ribonuclease 4 OS=Homo sapiens OX=9606 GN=RNASE4 PE=1 SV=3	RNASE4	X	X	X
	P08637	Low affinity immunoglobulin gamma Fc region receptor III-A OS=Homo sapiens OX=9606 GN=FCGR3A PE=1 SV=2	FCGR3A				X
	Q96RD9	Fc receptor-like protein 5 OS=Homo sapiens OX=9606 GN=FCRL5 PE=1 SV=3	FCRL5			X	X
	A0A0C4DH67	Immunoglobulin kappa variable 1-8 OS=Homo sapiens OX=9606 GN=IGKV1-8 PE=3 SV=1	IGKV1-8	X	X
	P02794	Ferritin heavy chain OS=Homo sapiens OX=9606 GN=FTH1 PE=1 SV=2	FTH1			X	X
	O00151	PDZ and LIM domain protein 1 OS=Homo sapiens OX=9606 GN=PDLIM1 PE=1 SV=4	PDLIM1		X	X	X
	P22392-2	Isoform 3 of Nucleoside diphosphate kinase B OS=Homo sapiens OX=9606 GN=NME2	NME2		X	X	X
	O94919	Endonuclease domain-containing 1 protein OS=Homo sapiens OX=9606 GN=ENDOD1 PE=1 SV=2	ENDOD1				X
	A0A0C4DH32	Immunoglobulin heavy variable 3-20 OS=Homo sapiens OX=9606 GN=IGHV3-20 PE=3 SV=2	IGHV3-20	X
	Q99650	Oncostatin-M-specific receptor subunit beta OS=Homo sapiens OX=9606 GN=OSMR PE=1 SV=1	OSMR		X	X	X
	O95834	Echinoderm microtubule-associated protein-like 2 OS=Homo sapiens OX=9606 GN=EML2 PE=1 SV=1	EML2			X	X
	P01040	Cystatin-A OS=Homo sapiens OX=9606 GN=CSTA PE=1 SV=1	CSTA		X	X	X
	P08887	Interleukin-6 receptor subunit alpha OS=Homo sapiens OX=9606 GN=IL6R PE=1 SV=1	IL6R				X
	P22314	Ubiquitin-like modifier-activating enzyme 1 OS=Homo sapiens OX=9606 GN=UBA1 PE=1 SV=3	UBA1			X	X
	Q9Y6N7	Roundabout homolog 1 OS=Homo sapiens OX=9606 GN=ROBO1 PE=1 SV=1	ROBO1				X
	P01344	Insulin-like growth factor II OS=Homo sapiens OX=9606 GN=IGF2 PE=1 SV=1	IGF2	X	X		X
	Q8IUL8	Cartilage intermediate layer protein 2 OS=Homo sapiens OX=9606 GN=CILP2 PE=2 SV=2	CILP2				X
	Q7Z3B1	Neuronal growth regulator 1 OS=Homo sapiens OX=9606 GN=NEGR1 PE=1 SV=3	NEGR1			X	X
	Q14697	Neutral alpha-glucosidase AB OS=Homo sapiens OX=9606 GN=GANAB PE=1 SV=3	GANAB		X	X	X
	P11279	Lysosome-associated membrane glycoprotein 1 OS=Homo sapiens OX=9606 GN=LAMP1 PE=1 SV=3	LAMP1	X	X	X	X
	P55268	Laminin subunit beta-2 OS=Homo sapiens OX=9606 GN=LAMB2 PE=1 SV=2	LAMB2				X
	P55285	Cadherin-6 OS=Homo sapiens OX=9606 GN=CDH6 PE=1 SV=1	CDH6		X	X	X
	P09467	Fructose-1,6-bisphosphatase 1 OS=Homo sapiens OX=9606 GN=FBP1 PE=1 SV=5	FBP1				X
	P02144	Myoglobin OS=Homo sapiens OX=9606 GN=MB PE=1 SV=2	MB			X	X
	Q01469	Fatty acid-binding protein 5 OS=Homo sapiens OX=9606 GN=FABP5 PE=1 SV=3	FABP5		X	X	X
	P01699	Immunoglobulin lambda variable 1-44 OS=Homo sapiens OX=9606 GN=IGLV1-44 PE=1 SV=2	IGLV1-44	X	X
	P05067	Amyloid-beta precursor protein OS=Homo sapiens OX=9606 GN=APP PE=1 SV=3	APP			X	X
	A0A075B6Q5	Immunoglobulin heavy variable 3-64 OS=Homo sapiens OX=9606 GN=IGHV3-64 PE=3 SV=1	IGHV3-64	X
	P13798	Acylamino-acid-releasing enzyme OS=Homo sapiens OX=9606 GN=APEH PE=1 SV=4	APEH			X	X
	A0A0B4J1X8	Immunoglobulin heavy variable 3-43 OS=Homo sapiens OX=9606 GN=IGHV3-43 PE=3 SV=1	IGHV3-43	X	X
	P01893	Putative HLA class I histocompatibility antigen, alpha chain H OS=Homo sapiens OX=9606 GN=HLA-H PE=5 SV=3	HLA-H				X
	O14818	Proteasome subunit alpha type-7 OS=Homo sapiens OX=9606 GN=PSMA7 PE=1 SV=1	PSMA7		X	X	X
	P15531	Nucleoside diphosphate kinase A OS=Homo sapiens OX=9606 GN=NME1 PE=1 SV=1	NME1			X	X
	Q13201	Multimerin-1 OS=Homo sapiens OX=9606 GN=MMRN1 PE=1 SV=3	MMRN1		X	X	X
	P69891	Hemoglobin subunit gamma-1 OS=Homo sapiens OX=9606 GN=HBG1 PE=1 SV=2	HBG1	X
	P35237	Serpin B6 OS=Homo sapiens OX=9606 GN=SERPINB6 PE=1 SV=3	SERPINB6				X
	P15814	Immunoglobulin lambda-like polypeptide 1 OS=Homo sapiens OX=9606 GN=IGLL1 PE=1 SV=1	IGLL1	X	X		X
	P02741	C-reactive protein OS=Homo sapiens OX=9606 GN=CRP PE=1 SV=1	CRP	X	X	X	X
	Q9NPR2	Semaphorin-4B OS=Homo sapiens OX=9606 GN=SEMA4B PE=1 SV=4	SEMA4B		X	X	X
	Q13162	Peroxiredoxin-4 OS=Homo sapiens OX=9606 GN=PRDX4 PE=1 SV=1	PRDX4				X
	P09525	Annexin A4 OS=Homo sapiens OX=9606 GN=ANXA4 PE=1 SV=4	ANXA4				X
	Q86UD1	Out at first protein homolog OS=Homo sapiens OX=9606 GN=OAF PE=2 SV=1	OAF	X	X	X	X
	P22692	Insulin-like growth factor-binding protein 4 OS=Homo sapiens OX=9606 GN=IGFBP4 PE=1 SV=2	IGFBP4	X	X		X
	P01718	Immunoglobulin lambda variable 3-27 OS=Homo sapiens OX=9606 GN=IGLV3-27 PE=1 SV=2	IGLV3-27	X	X
	Q5JPE7	Nodal modulator 2 OS=Homo sapiens OX=9606 GN=NOMO2 PE=1 SV=1	NOMO2			X	X
	O15143	Actin-related protein 2/3 complex subunit 1B OS=Homo sapiens OX=9606 GN=ARPC1B PE=1 SV=3	ARPC1B		X	X	X
	A2NJV5	Immunoglobulin kappa variable 2-29 OS=Homo sapiens OX=9606 GN=IGKV2-29 PE=3 SV=2	IGKV2-29	X	X
	P15311	Ezrin OS=Homo sapiens OX=9606 GN=EZR PE=1 SV=4	EZR			X	X
	A0A075B6S6	Immunoglobulin kappa variable 2D-30 OS=Homo sapiens OX=9606 GN=IGKV2D-30 PE=3 SV=1	IGKV2D-30	X
	A0A075B6K0	Immunoglobulin lambda variable 3-16 OS=Homo sapiens OX=9606 GN=IGLV3-16 PE=3 SV=2	IGLV3-16	X
	Q9H853	Putative tubulin-like protein alpha-4B OS=Homo sapiens OX=9606 GN=TUBA4B PE=5 SV=2	TUBA4B	X	X	X	X
	P10451	Osteopontin OS=Homo sapiens OX=9606 GN=SPP1 PE=1 SV=1	SPP1				X
	P05186	Alkaline phosphatase, tissue-nonspecific isozyme OS=Homo sapiens OX=9606 GN=ALPL PE=1 SV=4	ALPL				X
	Q9UIB8	SLAM family member 5 OS=Homo sapiens OX=9606 GN=CD84 PE=1 SV=1	CD84			X	X
	A0A0B4J1V2	Immunoglobulin heavy variable 2-26 OS=Homo sapiens OX=9606 GN=IGHV2-26 PE=3 SV=1	IGHV2-26	X	X
	Q9HC38-2	Isoform 2 of Glyoxalase domain-containing protein 4 OS=Homo sapiens OX=9606 GN=GLOD4	GLOD4				X
	P05109	Protein S100-A8 OS=Homo sapiens OX=9606 GN=S100A8 PE=1 SV=1	S100A8	X	X	X	X
	P60660	Myosin light polypeptide 6 OS=Homo sapiens OX=9606 GN=MYL6 PE=1 SV=2	MYL6	X
	P01593	Immunoglobulin kappa variable 1D-33 OS=Homo sapiens OX=9606 GN=IGKV1D-33 PE=1 SV=2	IGKV1D-33	X	X
	O43451	Maltase-glucoamylase, intestinal OS=Homo sapiens OX=9606 GN=MGAM PE=1 SV=5	MGAM		X		X
	P06312	Immunoglobulin kappa variable 4-1 OS=Homo sapiens OX=9606 GN=IGKV4-1 PE=1 SV=1	IGKV4-1	X	X
	Q9Y5Y7	Lymphatic vessel endothelial hyaluronic acid receptor 1 OS=Homo sapiens OX=9606 GN=LYVE1 PE=1 SV=2	LYVE1	X	X	X	X
	P10124	Serglycin OS=Homo sapiens OX=9606 GN=SRGN PE=1 SV=3	SRGN		X	X	X
	Q9UBQ6	Exostosin-like 2 OS=Homo sapiens OX=9606 GN=EXTL2 PE=1 SV=1	EXTL2		X	X	X
	Q14314	Fibroleukin OS=Homo sapiens OX=9606 GN=FGL2 PE=1 SV=1	FGL2				X
	P60900	Proteasome subunit alpha type-6 OS=Homo sapiens OX=9606 GN=PSMA6 PE=1 SV=1	PSMA6	X	X	X	X
	Q8TDY8	Immunoglobulin superfamily DCC subclass member 4 OS=Homo sapiens OX=9606 GN=IGDCC4 PE=1 SV=1	IGDCC4				X
	Q13418	Integrin-linked protein kinase OS=Homo sapiens OX=9606 GN=ILK PE=1 SV=2	ILK	X	X	X
	P0DSN7	Probable non-functional immunoglobulinn kappa variable 1D-37 OS=Homo sapiens OX=9606 GN=IGKV1D-37 PE=5 SV=1	IGKV1D-37	X	X
	A0A075B6H9	Immunoglobulin lambda variable 4-69 OS=Homo sapiens OX=9606 GN=IGLV4-69 PE=1 SV=1	IGLV4-69	X	X
	P04433	Immunoglobulin kappa variable 3-11 OS=Homo sapiens OX=9606 GN=IGKV3-11 PE=1 SV=1	IGKV3-11	X	X
	A0A0J9YX35	Immunoglobulin heavy variable 3-64D OS=Homo sapiens OX=9606 GN=IGHV3-64D PE=3 SV=1	IGHV3-64D	X	X
	P07384	Calpain-1 catalytic subunit OS=Homo sapiens OX=9606 GN=CAPN1 PE=1 SV=1	CAPN1		X	X	X
	P42785	Lysosomal Pro-X carboxypeptidase OS=Homo sapiens OX=9606 GN=PRCP PE=1 SV=1	PRCP		X	X	X
	P35442	Thrombospondin-2 OS=Homo sapiens OX=9606 GN=THBS2 PE=1 SV=2	THBS2				X
	P08236	Beta-glucuronidase OS=Homo sapiens OX=9606 GN=GUSB PE=1 SV=2	GUSB				X
	A0A0B4J1V0	Immunoglobulin heavy variable 3-15 OS=Homo sapiens OX=9606 GN=IGHV3-15 PE=3 SV=1	IGHV3-15	X	X
	O94985	Calsyntenin-1 OS=Homo sapiens OX=9606 GN=CLSTN1 PE=1 SV=1	CLSTN1			X	X
	Q16881	Thioredoxin reductase 1, cytoplasmic OS=Homo sapiens OX=9606 GN=TXNRD1 PE=1 SV=3	TXNRD1				X
	P27482	Calmodulin-like protein 3 OS=Homo sapiens OX=9606 GN=CALML3 PE=1 SV=2	CALML3				X
	P27930	Interleukin-1 receptor type 2 OS=Homo sapiens OX=9606 GN=IL1R2 PE=1 SV=1	IL1R2				X
	Q9HCU0	Endosialin OS=Homo sapiens OX=9606 GN=CD248 PE=1 SV=1	CD248				X
	P13489	Ribonuclease inhibitor OS=Homo sapiens OX=9606 GN=RNH1 PE=1 SV=2	RNH1			X	X
	P24593	Insulin-like growth factor-binding protein 5 OS=Homo sapiens OX=9606 GN=IGFBP5 PE=1 SV=1	IGFBP5	X	X	X	X
	P23471	Receptor-type tyrosine-protein phosphatase zeta OS=Homo sapiens OX=9606 GN=PTPRZ1 PE=1 SV=4	PTPRZ1				X
	P99999	Cytochrome c OS=Homo sapiens OX=9606 GN=CYCS PE=1 SV=2	CYCS		X	X	X
	P05089	Arginase-1 OS=Homo sapiens OX=9606 GN=ARG1 PE=1 SV=2	ARG1				X
	P55103	Inhibin beta C chain OS=Homo sapiens OX=9606 GN=INHBC PE=2 SV=1	INHBC	X	X	X	X
	P56199	Integrin alpha-1 OS=Homo sapiens OX=9606 GN=ITGA1 PE=1 SV=2	ITGA1			X	X
	P01709	Immunoglobulin lambda variable 2-8 OS=Homo sapiens OX=9606 GN=IGLV2-8 PE=1 SV=2	IGLV2-8	X	X
	Q08ET2	Sialic acid-binding Ig-like lectin 14 OS=Homo sapiens OX=9606 GN=SIGLEC14 PE=1 SV=1	SIGLEC14				X
	O75368	SH3 domain-binding glutamic acid-rich-like protein OS=Homo sapiens OX=9606 GN=SH3BGRL PE=1 SV=1	SH3BGRL			X	X
	O75339	Cartilage intermediate layer protein 1 OS=Homo sapiens OX=9606 GN=CILP PE=1 SV=4	CILP			X	X
	P80723	Brain acid soluble protein 1 OS=Homo sapiens OX=9606 GN=BASP1 PE=1 SV=2	BASP1			X	X
	Q9Y6Z7	Collectin-10 OS=Homo sapiens OX=9606 GN=COLEC10 PE=1 SV=2	COLEC10	X	X	X	X
	Q9Y279	V-set and immunoglobulin domain-containing protein 4 OS=Homo sapiens OX=9606 GN=VSIG4 PE=1 SV=1	VSIG4			X	X
	P13611-2	Isoform V1 of Versican core protein OS=Homo sapiens OX=9606 GN=VCAN	VCAN				X
	Q92520	Protein FAM3C OS=Homo sapiens OX=9606 GN=FAM3C PE=1 SV=1	FAM3C			X	X
	A0A0C4DH34	Immunoglobulin heavy variable 4-28 OS=Homo sapiens OX=9606 GN=IGHV4-28 PE=3 SV=1	IGHV4-28	X	X
	P13611	Versican core protein OS=Homo sapiens OX=9606 GN=VCAN PE=1 SV=3	VCAN				X
	P09417	Dihydropteridine reductase OS=Homo sapiens OX=9606 GN=QDPR PE=1 SV=2	QDPR				X
	Q9NSB4	Keratin, type II cuticular Hb2 OS=Homo sapiens OX=9606 GN=KRT82 PE=3 SV=3	KRT82			X
	Q15555	Microtubule-associated protein RP/EB family member 2 OS=Homo sapiens OX=9606 GN=MAPRE2 PE=1 SV=1	MAPRE2		X	X	X
	A0A0C4DH36	Probable non-functional immunoglobulin heavy variable 3-38 OS=Homo sapiens OX=9606 GN=IGHV3-38 PE=5 SV=1	IGHV3-38	X	X
	P15085	Carboxypeptidase A1 OS=Homo sapiens OX=9606 GN=CPA1 PE=1 SV=2	CPA1				X
	Q96HD1	Protein disulfide isomerase CRELD1 OS=Homo sapiens OX=9606 GN=CRELD1 PE=1 SV=3	CRELD1				X
	Q12866	Tyrosine-protein kinase Mer OS=Homo sapiens OX=9606 GN=MERTK PE=1 SV=2	MERTK				X
	P20810	Calpastatin OS=Homo sapiens OX=9606 GN=CAST PE=1 SV=4	CAST				X
	O15511	Actin-related protein 2/3 complex subunit 5 OS=Homo sapiens OX=9606 GN=ARPC5 PE=1 SV=3	ARPC5		X	X	X
	P48357	Leptin receptor OS=Homo sapiens OX=9606 GN=LEPR PE=1 SV=2	LEPR				X
	Q8IZP9	Adhesion G-protein coupled receptor G2 OS=Homo sapiens OX=9606 GN=ADGRG2 PE=1 SV=2	ADGRG2				X
	Q9BXJ4-3	Isoform 3 of Complement C1q tumor necrosis factor-related protein 3 OS=Homo sapiens OX=9606 GN=C1QTNF3	C1QTNF3	X	X	X	X
	Q8TER0	Sushi, nidogen and EGF-like domain-containing protein 1 OS=Homo sapiens OX=9606 GN=SNED1 PE=2 SV=2	SNED1				X
	Q8NCC3	Group XV phospholipase A2 OS=Homo sapiens OX=9606 GN=PLA2G15 PE=1 SV=2	PLA2G15				X
	P35968	Vascular endothelial growth factor receptor 2 OS=Homo sapiens OX=9606 GN=KDR PE=1 SV=2	KDR				X
	P0DP25	Calmodulin-3 OS=Homo sapiens OX=9606 GN=CALM3 PE=1 SV=1	CALM3			X	X
	Q9H0X4	Protein FAM234A OS=Homo sapiens OX=9606 GN=FAM234A PE=1 SV=1	FAM234A				X
	P53634	Dipeptidyl peptidase 1 OS=Homo sapiens OX=9606 GN=CTSC PE=1 SV=2	CTSC			X	X
	A0A075B6R9	Probable non-functional immunoglobulin kappa variable 2D-24 OS=Homo sapiens OX=9606 GN=IGKV2D-24 PE=5 SV=1	IGKV2D-24	X	X
	P55083	Microfibril-associated glycoprotein 4 OS=Homo sapiens OX=9606 GN=MFAP4 PE=1 SV=2	MFAP4		X	X	X
	Q9UEW3	Macrophage receptor MARCO OS=Homo sapiens OX=9606 GN=MARCO PE=1 SV=1	MARCO				X
	Q96KG7	Multiple epidermal growth factor-like domains protein 10 OS=Homo sapiens OX=9606 GN=MEGF10 PE=1 SV=1	MEGF10				X
	A0A075B6J9	Immunoglobulin lambda variable 2-18 OS=Homo sapiens OX=9606 GN=IGLV2-18 PE=3 SV=2	IGLV2-18	X	X
	Q12841	Follistatin-related protein 1 OS=Homo sapiens OX=9606 GN=FSTL1 PE=1 SV=1	FSTL1		X	X	X
	P17927	Complement receptor type 1 OS=Homo sapiens OX=9606 GN=CR1 PE=1 SV=3	CR1				X
	P23284	Peptidyl-prolyl cis-trans isomerase B OS=Homo sapiens OX=9606 GN=PPIB PE=1 SV=2	PPIB	X	X	X	X
	Q9HCN6	Platelet glycoprotein VI OS=Homo sapiens OX=9606 GN=GP6 PE=1 SV=4	GP6			X	X
	P19013	Keratin, type II cytoskeletal 4 OS=Homo sapiens OX=9606 GN=KRT4 PE=1 SV=4	KRT4				X
	P49913	Cathelicidin antimicrobial peptide OS=Homo sapiens OX=9606 GN=CAMP PE=1 SV=1	CAMP	X	X	X	X
	P48304	Lithostathine-1-beta OS=Homo sapiens OX=9606 GN=REG1B PE=1 SV=1	REG1B				X
	P50453	Serpin B9 OS=Homo sapiens OX=9606 GN=SERPINB9 PE=1 SV=1	SERPINB9				X
	Q9HCL0	Protocadherin-18 OS=Homo sapiens OX=9606 GN=PCDH18 PE=2 SV=3	PCDH18			X	X
	Q8IWL2	Pulmonary surfactant-associated protein A1 OS=Homo sapiens OX=9606 GN=SFTPA1 PE=1 SV=2	SFTPA1				X
	O60279	Sushi domain-containing protein 5 OS=Homo sapiens OX=9606 GN=SUSD5 PE=1 SV=3	SUSD5			X	X
	P61160	Actin-related protein 2 OS=Homo sapiens OX=9606 GN=ACTR2 PE=1 SV=1	ACTR2		X	X	X
	P08729	Keratin, type II cytoskeletal 7 OS=Homo sapiens OX=9606 GN=KRT7 PE=1 SV=5	KRT7				X
	P16581	E-selectin OS=Homo sapiens OX=9606 GN=SELE PE=1 SV=1	SELE				X
	Q9P121	Neurotrimin OS=Homo sapiens OX=9606 GN=NTM PE=1 SV=1	NTM				X
	O75223	Gamma-glutamylcyclotransferase OS=Homo sapiens OX=9606 GN=GGCT PE=1 SV=1	GGCT		X	X	X
	P12883	Myosin-7 OS=Homo sapiens OX=9606 GN=MYH7 PE=1 SV=5	MYH7				X
	Q8NCW5	NAD(P)H-hydrate epimerase OS=Homo sapiens OX=9606 GN=NAXE PE=1 SV=2	NAXE				X
	P31947	14-3-3 protein sigma OS=Homo sapiens OX=9606 GN=SFN PE=1 SV=1	SFN	X	X		X
	P01817	Immunoglobulin heavy variable 2-5 OS=Homo sapiens OX=9606 GN=IGHV2-5 PE=1 SV=2	IGHV2-5	X
	P12273	Prolactin-inducible protein OS=Homo sapiens OX=9606 GN=PIP PE=1 SV=1	PIP		X	X	X
	Q9Y2E5	Epididymis-specific alpha-mannosidase OS=Homo sapiens OX=9606 GN=MAN2B2 PE=1 SV=4	MAN2B2				X
	Q9HAT2	Sialate O-acetylesterase OS=Homo sapiens OX=9606 GN=SIAE PE=1 SV=1	SIAE				X
	P58546	Myotrophin OS=Homo sapiens OX=9606 GN=MTPN PE=1 SV=2	MTPN			X	X
	Q16620	BDNF/NT-3 growth factors receptor OS=Homo sapiens OX=9606 GN=NTRK2 PE=1 SV=1	NTRK2				X
	P01704	Immunoglobulin lambda variable 2-14 OS=Homo sapiens OX=9606 GN=IGLV2-14 PE=1 SV=2	IGLV2-14	X	X
	O00592	Podocalyxin OS=Homo sapiens OX=9606 GN=PODXL PE=1 SV=2	PODXL		X		X
	Q8NFT8	Delta and Notch-like epidermal growth factor-related receptor OS=Homo sapiens OX=9606 GN=DNER PE=1 SV=1	DNER				X
	P04430	Immunoglobulin kappa variable 1-16 OS=Homo sapiens OX=9606 GN=IGKV1-16 PE=1 SV=2	IGKV1-16	X
	Q9UMX5	Neudesin OS=Homo sapiens OX=9606 GN=NENF PE=1 SV=1	NENF				X
	O60449	Lymphocyte antigen 75 OS=Homo sapiens OX=9606 GN=LY75 PE=1 SV=3	LY75				X
	P68104	Elongation factor 1-alpha 1 OS=Homo sapiens OX=9606 GN=EEF1A1 PE=1 SV=1	EEF1A1		X	X
	P06454	Prothymosin alpha OS=Homo sapiens OX=9606 GN=PTMA PE=1 SV=2	PTMA				X
	Q9HCB6	Spondin-1 OS=Homo sapiens OX=9606 GN=SPON1 PE=1 SV=2	SPON1		X	X	X
	O14950	Myosin regulatory light chain 12B OS=Homo sapiens OX=9606 GN=MYL12B PE=1 SV=2	MYL12B	X
	Q15262	Receptor-type tyrosine-protein phosphatase kappa OS=Homo sapiens OX=9606 GN=PTPRK PE=1 SV=2	PTPRK			X	X
	P10619	Lysosomal protective protein OS=Homo sapiens OX=9606 GN=CTSA PE=1 SV=2	CTSA			X	X
	Q13835	Plakophilin-1 OS=Homo sapiens OX=9606 GN=PKP1 PE=1 SV=2	PKP1			X	X
	P28066	Proteasome subunit alpha type-5 OS=Homo sapiens OX=9606 GN=PSMA5 PE=1 SV=3	PSMA5			X	X
	A0A0B4J1Y8	Immunoglobulin lambda variable 9-49 OS=Homo sapiens OX=9606 GN=IGLV9-49 PE=1 SV=1	IGLV9-49	X	X
	Q7RTS7	Keratin, type II cytoskeletal 74 OS=Homo sapiens OX=9606 GN=KRT74 PE=1 SV=2	KRT74			X	X
	P54764	Ephrin type-A receptor 4 OS=Homo sapiens OX=9606 GN=EPHA4 PE=1 SV=1	EPHA4				X
	Q9UQ52	Contactin-6 OS=Homo sapiens OX=9606 GN=CNTN6 PE=1 SV=1	CNTN6				X
	Q7Z5N4	Protein sidekick-1 OS=Homo sapiens OX=9606 GN=SDK1 PE=2 SV=3	SDK1				X
	Q9Y274	Type 2 lactosamine alpha-2,3-sialyltransferase OS=Homo sapiens OX=9606 GN=ST3GAL6 PE=1 SV=1	ST3GAL6			X	X
	P12318	Low affinity immunoglobulin gamma Fc region receptor II-a OS=Homo sapiens OX=9606 GN=FCGR2A PE=1 SV=4	FCGR2A		X		X
	P14550	Aldo-keto reductase family 1 member A1 OS=Homo sapiens OX=9606 GN=AKR1A1 PE=1 SV=3	AKR1A1				X
	P13929	Beta-enolase OS=Homo sapiens OX=9606 GN=ENO3 PE=1 SV=5	ENO3		X
	P31431	Syndecan-4 OS=Homo sapiens OX=9606 GN=SDC4 PE=1 SV=2	SDC4				X
	P18850	Cyclic AMP-dependent transcription factor ATF-6 alpha OS=Homo sapiens OX=9606 GN=ATF6 PE=1 SV=3	ATF6				X
	P15121	Aldo-keto reductase family 1 member B1 OS=Homo sapiens OX=9606 GN=AKR1B1 PE=1 SV=3	AKR1B1				X
	P05121	Plasminogen activator inhibitor 1 OS=Homo sapiens OX=9606 GN=SERPINE1 PE=1 SV=1	SERPINE1			X	X
	A0A0A0MS14	Immunoglobulin heavy variable 1-45 OS=Homo sapiens OX=9606 GN=IGHV1-45 PE=3 SV=1	IGHV1-45	X
	Q7Z7M8	UDP-GlcNAc:betaGal beta-1,3-N-acetylglucosaminyltransferase 8 OS=Homo sapiens OX=9606 GN=B3GNT8 PE=1 SV=1	B3GNT8			X	X
	P27824	Calnexin OS=Homo sapiens OX=9606 GN=CANX PE=1 SV=2	CANX				X
	Q9UM47	Neurogenic locus notch homolog protein 3 OS=Homo sapiens OX=9606 GN=NOTCH3 PE=1 SV=2	NOTCH3		X		X
	Q9NQ38	Serine protease inhibitor Kazal-type 5 OS=Homo sapiens OX=9606 GN=SPINK5 PE=1 SV=2	SPINK5			X	X
	P06732	Creatine kinase M-type OS=Homo sapiens OX=9606 GN=CKM PE=1 SV=2	CKM			X
	P23435	Cerebellin-1 OS=Homo sapiens OX=9606 GN=CBLN1 PE=1 SV=1	CBLN1			X	X
	P54727	UV excision repair protein RAD23 homolog B OS=Homo sapiens OX=9606 GN=RAD23B PE=1 SV=1	RAD23B			X	X
	Q9NR71	Neutral ceramidase OS=Homo sapiens OX=9606 GN=ASAH2 PE=1 SV=2	ASAH2				X
	P62987	Ubiquitin-60S ribosomal protein L40 OS=Homo sapiens OX=9606 GN=UBA52 PE=1 SV=2	UBA52	X	X	X	X
	A0A0B4J2D9	Immunoglobulin kappa variable 1D-13 OS=Homo sapiens OX=9606 GN=IGKV1D-13 PE=3 SV=1	IGKV1D-13	X	X
	P09104	Gamma-enolase OS=Homo sapiens OX=9606 GN=ENO2 PE=1 SV=3	ENO2			X	X
	Q99983	Osteomodulin OS=Homo sapiens OX=9606 GN=OMD PE=1 SV=1	OMD			X	X
	P49641-1	Isoform 1 of Alpha-mannosidase 2x OS=Homo sapiens OX=9606 GN=MAN2A2	MAN2A2				X
	O00241	Signal-regulatory protein beta-1 OS=Homo sapiens OX=9606 GN=SIRPB1 PE=1 SV=5	SIRPB1				X
	Q6UY14	ADAMTS-like protein 4 OS=Homo sapiens OX=9606 GN=ADAMTSL4 PE=1 SV=2	ADAMTSL4		X	X	X
	Q5VY43	Platelet endothelial aggregation receptor 1 OS=Homo sapiens OX=9606 GN=PEAR1 PE=1 SV=1	PEAR1				X
	P68036	Ubiquitin-conjugating enzyme E2 L3 OS=Homo sapiens OX=9606 GN=UBE2L3 PE=1 SV=1	UBE2L3			X	X
	P03950	Angiogenin OS=Homo sapiens OX=9606 GN=ANG PE=1 SV=1	ANG	X	X	X	X
	P21291	Cysteine and glycine-rich protein 1 OS=Homo sapiens OX=9606 GN=CSRP1 PE=1 SV=3	CSRP1	X	X	X
	A0A0B4J1U3	Immunoglobulin lambda variable 1-36 OS=Homo sapiens OX=9606 GN=IGLV1-36 PE=1 SV=5	IGLV1-36	X
	Q9UI42	Carboxypeptidase A4 OS=Homo sapiens OX=9606 GN=CPA4 PE=1 SV=2	CPA4				X
	P28062	Proteasome subunit beta type-8 OS=Homo sapiens OX=9606 GN=PSMB8 PE=1 SV=3	PSMB8				X
	P52907	F-actin-capping protein subunit alpha-1 OS=Homo sapiens OX=9606 GN=CAPZA1 PE=1 SV=3	CAPZA1			X	X
	P28799	Progranulin OS=Homo sapiens OX=9606 GN=GRN PE=1 SV=2	GRN	X		X	X
	P15529	Membrane cofactor protein OS=Homo sapiens OX=9606 GN=CD46 PE=1 SV=3	CD46				X
	P10912	Growth hormone receptor OS=Homo sapiens OX=9606 GN=GHR PE=1 SV=1	GHR				X
	P59998	Actin-related protein 2/3 complex subunit 4 OS=Homo sapiens OX=9606 GN=ARPC4 PE=1 SV=3	ARPC4		X	X	X
	Q9UGN4	CMRF35-like molecule 8 OS=Homo sapiens OX=9606 GN=CD300A PE=1 SV=2	CD300A				X
	Q6UXK5	Leucine-rich repeat neuronal protein 1 OS=Homo sapiens OX=9606 GN=LRRN1 PE=1 SV=1	LRRN1				X
	P23468-2	Isoform 2 of Receptor-type tyrosine-protein phosphatase delta OS=Homo sapiens OX=9606 GN=PTPRD	PTPRD				X
	Q9NZH8	Interleukin-36 gamma OS=Homo sapiens OX=9606 GN=IL36G PE=1 SV=1	IL36G				X
	Q13231	Chitotriosidase-1 OS=Homo sapiens OX=9606 GN=CHIT1 PE=1 SV=1	CHIT1			X	X
	O43396	Thioredoxin-like protein 1 OS=Homo sapiens OX=9606 GN=TXNL1 PE=1 SV=3	TXNL1				X
	P02730	Band 3 anion transport protein OS=Homo sapiens OX=9606 GN=SLC4A1 PE=1 SV=3	SLC4A1	X
	A0A075B6I0	Immunoglobulin lambda variable 8-61 OS=Homo sapiens OX=9606 GN=IGLV8-61 PE=3 SV=7	IGLV8-61	X	X
	Q15828	Cystatin-M OS=Homo sapiens OX=9606 GN=CST6 PE=1 SV=1	CST6			X	X
	Q16531	DNA damage-binding protein 1 OS=Homo sapiens OX=9606 GN=DDB1 PE=1 SV=1	DDB1				X
	Q9H4G4	Golgi-associated plant pathogenesis-related protein 1 OS=Homo sapiens OX=9606 GN=GLIPR2 PE=1 SV=3	GLIPR2	X	X	X
	P04626	Receptor tyrosine-protein kinase erbB-2 OS=Homo sapiens OX=9606 GN=ERBB2 PE=1 SV=1	ERBB2				X
	P26447	Protein S100-A4 OS=Homo sapiens OX=9606 GN=S100A4 PE=1 SV=1	S100A4	X	X	X	X
	P01602	Immunoglobulin kappa variable 1-5 OS=Homo sapiens OX=9606 GN=IGKV1-5 PE=1 SV=2	IGKV1-5	X	X
	Q96NZ9	Proline-rich acidic protein 1 OS=Homo sapiens OX=9606 GN=PRAP1 PE=1 SV=2	PRAP1			X	X
	Q10471	Polypeptide N-acetylgalactosaminyltransferase 2 OS=Homo sapiens OX=9606 GN=GALNT2 PE=1 SV=1	GALNT2			X	X
	P00568	Adenylate kinase isoenzyme 1 OS=Homo sapiens OX=9606 GN=AK1 PE=1 SV=3	AK1			X	X
	Q5ZPR3	CD276 antigen OS=Homo sapiens OX=9606 GN=CD276 PE=1 SV=1	CD276				X
	P13987	CD59 glycoprotein OS=Homo sapiens OX=9606 GN=CD59 PE=1 SV=1	CD59	X	X	X	X
	P10809	60 kDa heat shock protein, mitochondrial OS=Homo sapiens OX=9606 GN=HSPD1 PE=1 SV=2	HSPD1	X
	P20908	Collagen alpha-1(V) chain OS=Homo sapiens OX=9606 GN=COL5A1 PE=1 SV=3	COL5A1				X
	Q8NHL6	Leukocyte immunoglobulin-like receptor subfamily B member 1 OS=Homo sapiens OX=9606 GN=LILRB1 PE=1 SV=1	LILRB1				X
	P25774	Cathepsin S OS=Homo sapiens OX=9606 GN=CTSS PE=1 SV=3	CTSS			X	X
	Q15257	Serine/threonine-protein phosphatase 2A activator OS=Homo sapiens OX=9606 GN=PTPA PE=1 SV=3	PTPA				X
	P13693	Translationally-controlled tumor protein OS=Homo sapiens OX=9606 GN=TPT1 PE=1 SV=1	TPT1				X
	Q06418	Tyrosine-protein kinase receptor TYRO3 OS=Homo sapiens OX=9606 GN=TYRO3 PE=1 SV=1	TYRO3				X
	Q8IYS5	Osteoclast-associated immunoglobulin-like receptor OS=Homo sapiens OX=9606 GN=OSCAR PE=1 SV=3	OSCAR				X
	P30046	D-dopachrome decarboxylase OS=Homo sapiens OX=9606 GN=DDT PE=1 SV=3	DDT				X
	P98161	Polycystin-1 OS=Homo sapiens OX=9606 GN=PKD1 PE=1 SV=3	PKD1				X
	Q9Y696	Chloride intracellular channel protein 4 OS=Homo sapiens OX=9606 GN=CLIC4 PE=1 SV=4	CLIC4			X	X
	Q99435	Protein kinase C-binding protein NELL2 OS=Homo sapiens OX=9606 GN=NELL2 PE=1 SV=1	NELL2				X
	P09668	Pro-cathepsin H OS=Homo sapiens OX=9606 GN=CTSH PE=1 SV=4	CTSH		X	X	X
	Q9Y2B0	Protein canopy homolog 2 OS=Homo sapiens OX=9606 GN=CNPY2 PE=1 SV=1	CNPY2				X
	Q14956	Transmembrane glycoprotein NMB OS=Homo sapiens OX=9606 GN=GPNMB PE=1 SV=2	GPNMB		X	X	X
	P41439	Folate receptor gamma OS=Homo sapiens OX=9606 GN=FOLR3 PE=1 SV=2	FOLR3				X
	P24387	Corticotropin-releasing factor-binding protein OS=Homo sapiens OX=9606 GN=CRHBP PE=1 SV=2	CRHBP		X	X	X
	Q6UWP8	Suprabasin OS=Homo sapiens OX=9606 GN=SBSN PE=1 SV=2	SBSN			X	X
	P10599	Thioredoxin OS=Homo sapiens OX=9606 GN=TXN PE=1 SV=3	TXN	X	X	X	X
	A0A0C4DH35	Probable non-functional immunoglobulin heavy variable 3-35 OS=Homo sapiens OX=9606 GN=IGHV3-35 PE=5 SV=1	IGHV3-35	X	X
	Q9HBR0	Putative sodium-coupled neutral amino acid transporter 10 OS=Homo sapiens OX=9606 GN=SLC38A10 PE=1 SV=2	SLC38A10			X	X
	P19256	Lymphocyte function-associated antigen 3 OS=Homo sapiens OX=9606 GN=CD58 PE=1 SV=1	CD58			X	X
	Q16181	Septin-7 OS=Homo sapiens OX=9606 GN=SEPTIN7 PE=1 SV=2	SEPTIN7			X
	P25786	Proteasome subunit alpha type-1 OS=Homo sapiens OX=9606 GN=PSMA1 PE=1 SV=1	PSMA1		X	X	X
	Q9BS40	Latexin OS=Homo sapiens OX=9606 GN=LXN PE=1 SV=2	LXN				X
	P16233	Pancreatic triacylglycerol lipase OS=Homo sapiens OX=9606 GN=PNLIP PE=1 SV=1	PNLIP				X
	A0A087WSZ0	Immunoglobulin kappa variable 1D-8 OS=Homo sapiens OX=9606 GN=IGKV1D-8 PE=3 SV=6	IGKV1D-8	X
	P07451	Carbonic anhydrase 3 OS=Homo sapiens OX=9606 GN=CA3 PE=1 SV=3	CA3				X
	Q6KB66	Keratin, type II cytoskeletal 80 OS=Homo sapiens OX=9606 GN=KRT80 PE=1 SV=2	KRT80				X
	P23467	Receptor-type tyrosine-protein phosphatase beta OS=Homo sapiens OX=9606 GN=PTPRB PE=1 SV=3	PTPRB				X
	Q9BQ51	Programmed cell death 1 ligand 2 OS=Homo sapiens OX=9606 GN=PDCD1LG2 PE=1 SV=2	PDCD1LG2				X
	Q9NSC7	Alpha-N-acetylgalactosaminide alpha-2,6-sialyltransferase 1 OS=Homo sapiens OX=9606 GN=ST6GALNAC1 PE=2 SV=1	ST6GALNAC1				X
	Q07960	Rho GTPase-activating protein 1 OS=Homo sapiens OX=9606 GN=ARHGAP1 PE=1 SV=1	ARHGAP1			X	X
	Q93070	Ecto-ADP-ribosyltransferase 4 OS=Homo sapiens OX=9606 GN=ART4 PE=2 SV=2	ART4				X
	Q6GTS8	N-fatty-acyl-amino acid synthase/hydrolase PM20D1 OS=Homo sapiens OX=9606 GN=PM20D1 PE=2 SV=3	PM20D1			X	X
	O15204	ADAM DEC1 OS=Homo sapiens OX=9606 GN=ADAMDEC1 PE=1 SV=2	ADAMDEC1			X	X
	P28072	Proteasome subunit beta type-6 OS=Homo sapiens OX=9606 GN=PSMB6 PE=1 SV=4	PSMB6		X	X	X
	P07711	Cathepsin L1 OS=Homo sapiens OX=9606 GN=CTSL PE=1 SV=2	CTSL			X	X
	P01137	Transforming growth factor beta-1 proprotein OS=Homo sapiens OX=9606 GN=TGFB1 PE=1 SV=2	TGFB1			X	X
	Q6PI73	Leukocyte immunoglobulin-like receptor subfamily A member 6 OS=Homo sapiens OX=9606 GN=LILRA6 PE=2 SV=2	LILRA6				X
	Q02952	A-kinase anchor protein 12 OS=Homo sapiens OX=9606 GN=AKAP12 PE=1 SV=4	AKAP12				X
	O75356	Ectonucleoside triphosphate diphosphohydrolase 5 OS=Homo sapiens OX=9606 GN=ENTPD5 PE=1 SV=1	ENTPD5				X
	P09326	CD48 antigen OS=Homo sapiens OX=9606 GN=CD48 PE=1 SV=2	CD48				X
	Q9UJ14	Glutathione hydrolase 7 OS=Homo sapiens OX=9606 GN=GGT7 PE=1 SV=2	GGT7				X
	Q96B86	Repulsive guidance molecule A OS=Homo sapiens OX=9606 GN=RGMA PE=1 SV=3	RGMA				X
	P61204	ADP-ribosylation factor 3 OS=Homo sapiens OX=9606 GN=ARF3 PE=1 SV=2	ARF3			X
	P04440	HLA class II histocompatibility antigen, DP beta 1 chain OS=Homo sapiens OX=9606 GN=HLA-DPB1 PE=1 SV=1	HLA-DPB1				X
	Q8WWA1	Transmembrane protein 40 OS=Homo sapiens OX=9606 GN=TMEM40 PE=1 SV=2	TMEM40				X
	Q9NPG4	Protocadherin-12 OS=Homo sapiens OX=9606 GN=PCDH12 PE=1 SV=1	PCDH12				X
	P20774	Mimecan OS=Homo sapiens OX=9606 GN=OGN PE=1 SV=1	OGN		X	X	X
	Q16288	NT-3 growth factor receptor OS=Homo sapiens OX=9606 GN=NTRK3 PE=1 SV=2	NTRK3				X
	P78552	Interleukin-13 receptor subunit alpha-1 OS=Homo sapiens OX=9606 GN=IL13RA1 PE=1 SV=1	IL13RA1				X
	P36268	Inactive glutathione hydrolase 2 OS=Homo sapiens OX=9606 GN=GGT2 PE=1 SV=3	GGT2				X
	P46109	Crk-like protein OS=Homo sapiens OX=9606 GN=CRKL PE=1 SV=1	CRKL			X	X
	P59665	Neutrophil defensin 1 OS=Homo sapiens OX=9606 GN=DEFA1 PE=1 SV=1	DEFA1	X	X		X
	P63241	Eukaryotic translation initiation factor 5A-1 OS=Homo sapiens OX=9606 GN=EIF5A PE=1 SV=2	EIF5A		X	X	X
	P20138	Myeloid cell surface antigen CD33 OS=Homo sapiens OX=9606 GN=CD33 PE=1 SV=2	CD33				X
	P62942	Peptidyl-prolyl cis-trans isomerase FKBP1A OS=Homo sapiens OX=9606 GN=FKBP1A PE=1 SV=2	FKBP1A		X	X	X
	P20061	Transcobalamin-1 OS=Homo sapiens OX=9606 GN=TCN1 PE=1 SV=2	TCN1				X
	Q6ZMI3	Gliomedin OS=Homo sapiens OX=9606 GN=GLDN PE=1 SV=1	GLDN				X
	Q9UHL4	Dipeptidyl peptidase 2 OS=Homo sapiens OX=9606 GN=DPP7 PE=1 SV=3	DPP7				X
	Q9Y4D7	Plexin-D1 OS=Homo sapiens OX=9606 GN=PLXND1 PE=1 SV=3	PLXND1				X
	P81605	Dermcidin OS=Homo sapiens OX=9606 GN=DCD PE=1 SV=2	DCD	X	X	X	X
	Q9H8L6	Multimerin-2 OS=Homo sapiens OX=9606 GN=MMRN2 PE=1 SV=2	MMRN2	X	X	X	X
	P20036	HLA class II histocompatibility antigen, DP alpha 1 chain OS=Homo sapiens OX=9606 GN=HLA-DPA1 PE=1 SV=1	HLA-DPA1				X
	P15291	Beta-1,4-galactosyltransferase 1 OS=Homo sapiens OX=9606 GN=B4GALT1 PE=1 SV=5	B4GALT1		X	X	X
	Q14982	Opioid-binding protein/cell adhesion molecule OS=Homo sapiens OX=9606 GN=OPCML PE=1 SV=1	OPCML				X
	P17693	HLA class I histocompatibility antigen, alpha chain G OS=Homo sapiens OX=9606 GN=HLA-G PE=1 SV=1	HLA-G				X
	Q93063	Exostosin-2 OS=Homo sapiens OX=9606 GN=EXT2 PE=1 SV=1	EXT2			X	X
	Q5T749	Keratinocyte proline-rich protein OS=Homo sapiens OX=9606 GN=KPRP PE=1 SV=1	KPRP		X	X	X
	P20930	Filaggrin OS=Homo sapiens OX=9606 GN=FLG PE=1 SV=3	FLG	X	X	X	X
	P14324	Farnesyl pyrophosphate synthase OS=Homo sapiens OX=9606 GN=FDPS PE=1 SV=4	FDPS				X
	O43278	Kunitz-type protease inhibitor 1 OS=Homo sapiens OX=9606 GN=SPINT1 PE=1 SV=2	SPINT1				X
	P14207	Folate receptor beta OS=Homo sapiens OX=9606 GN=FOLR2 PE=1 SV=4	FOLR2				X
	O75509	Tumor necrosis factor receptor superfamily member 21 OS=Homo sapiens OX=9606 GN=TNFRSF21 PE=1 SV=1	TNFRSF21				X
	P17900	Ganglioside GM2 activator OS=Homo sapiens OX=9606 GN=GM2A PE=1 SV=4	GM2A			X	X
	P50452	Serpin B8 OS=Homo sapiens OX=9606 GN=SERPINB8 PE=1 SV=2	SERPINB8				X
	P31025	Lipocalin-1 OS=Homo sapiens OX=9606 GN=LCN1 PE=1 SV=1	LCN1			X	X
	Q9NY47	Voltage-dependent calcium channel subunit alpha-2/delta-2 OS=Homo sapiens OX=9606 GN=CACNA2D2 PE=1 SV=2	CACNA2D2				X
	O75791	GRB2-related adapter protein 2 OS=Homo sapiens OX=9606 GN=GRAP2 PE=1 SV=1	GRAP2				X
	P12931	Proto-oncogene tyrosine-protein kinase Src OS=Homo sapiens OX=9606 GN=SRC PE=1 SV=3	SRC	X	X	X	X
	Q02763	Angiopoietin-1 receptor OS=Homo sapiens OX=9606 GN=TEK PE=1 SV=2	TEK				X
	Q9H254	Spectrin beta chain, non-erythrocytic 4 OS=Homo sapiens OX=9606 GN=SPTBN4 PE=1 SV=2	SPTBN4		X	X	X
	Q8IUK8	Cerebellin-2 OS=Homo sapiens OX=9606 GN=CBLN2 PE=2 SV=1	CBLN2			X	X
	Q58EX2	Protein sidekick-2 OS=Homo sapiens OX=9606 GN=SDK2 PE=1 SV=3	SDK2				X
	P62826	GTP-binding nuclear protein Ran OS=Homo sapiens OX=9606 GN=RAN PE=1 SV=3	RAN				X
	P62993	Growth factor receptor-bound protein 2 OS=Homo sapiens OX=9606 GN=GRB2 PE=1 SV=1	GRB2			X	X
	Q9HBW9	Adhesion G protein-coupled receptor L4 OS=Homo sapiens OX=9606 GN=ADGRL4 PE=1 SV=3	ADGRL4			X	X
	P11413	Glucose-6-phosphate 1-dehydrogenase OS=Homo sapiens OX=9606 GN=G6PD PE=1 SV=4	G6PD			X	X
	A0A0C4DH24	Immunoglobulin kappa variable 6-21 OS=Homo sapiens OX=9606 GN=IGKV6-21 PE=3 SV=1	IGKV6-21	X	X
	Q08830	Fibrinogen-like protein 1 OS=Homo sapiens OX=9606 GN=FGL1 PE=1 SV=3	FGL1	X		X	X
	Q5T013	Putative hydroxypyruvate isomerase OS=Homo sapiens OX=9606 GN=HYI PE=1 SV=2	HYI				X
	Q14847	LIM and SH3 domain protein 1 OS=Homo sapiens OX=9606 GN=LASP1 PE=1 SV=2	LASP1		X	X
	A0A075B6J1	Immunoglobulin lambda variable 5-37 OS=Homo sapiens OX=9606 GN=IGLV5-37 PE=3 SV=1	IGLV5-37	X
	P04792	Heat shock protein beta-1 OS=Homo sapiens OX=9606 GN=HSPB1 PE=1 SV=2	HSPB1		X	X	X
	P21583	Kit ligand OS=Homo sapiens OX=9606 GN=KITLG PE=1 SV=1	KITLG				X
	P00492	Hypoxanthine-guanine phosphoribosyltransferase OS=Homo sapiens OX=9606 GN=HPRT1 PE=1 SV=2	HPRT1				X
	P49247	Ribose-5-phosphate isomerase OS=Homo sapiens OX=9606 GN=RPIA PE=1 SV=3	RPIA				X
	P01705	Immunoglobulin lambda variable 2-23 OS=Homo sapiens OX=9606 GN=IGLV2-23 PE=1 SV=2	IGLV2-23	X	X
	Q96P63	Serpin B12 OS=Homo sapiens OX=9606 GN=SERPINB12 PE=1 SV=1	SERPINB12			X	X
	P60981	Destrin OS=Homo sapiens OX=9606 GN=DSTN PE=1 SV=3	DSTN			X	X
	P32754	4-hydroxyphenylpyruvate dioxygenase OS=Homo sapiens OX=9606 GN=HPD PE=1 SV=2	HPD				X
	Q8IZA0	Dyslexia-associated protein KIAA0319-like protein OS=Homo sapiens OX=9606 GN=KIAA0319L PE=1 SV=2	KIAA0319L				X
	P54578	Ubiquitin carboxyl-terminal hydrolase 14 OS=Homo sapiens OX=9606 GN=USP14 PE=1 SV=3	USP14			X	X
	Q15375	Ephrin type-A receptor 7 OS=Homo sapiens OX=9606 GN=EPHA7 PE=1 SV=3	EPHA7				X
	P54760	Ephrin type-B receptor 4 OS=Homo sapiens OX=9606 GN=EPHB4 PE=1 SV=2	EPHB4				X
	P21709	Ephrin type-A receptor 1 OS=Homo sapiens OX=9606 GN=EPHA1 PE=1 SV=4	EPHA1				X
	Q12765	Secernin-1 OS=Homo sapiens OX=9606 GN=SCRN1 PE=1 SV=2	SCRN1				X
	O75635	Serpin B7 OS=Homo sapiens OX=9606 GN=SERPINB7 PE=1 SV=1	SERPINB7				X
	P29017	T-cell surface glycoprotein CD1c OS=Homo sapiens OX=9606 GN=CD1C PE=1 SV=2	CD1C				X
	Q9NY15	Stabilin-1 OS=Homo sapiens OX=9606 GN=STAB1 PE=1 SV=3	STAB1				X
	P04156	Major prion protein OS=Homo sapiens OX=9606 GN=PRNP PE=1 SV=1	PRNP				X
	P55209	Nucleosome assembly protein 1-like 1 OS=Homo sapiens OX=9606 GN=NAP1L1 PE=1 SV=1	NAP1L1		X	X
	P22455	Fibroblast growth factor receptor 4 OS=Homo sapiens OX=9606 GN=FGFR4 PE=1 SV=2	FGFR4				X
	Q16627	C-C motif chemokine 14 OS=Homo sapiens OX=9606 GN=CCL14 PE=1 SV=1	CCL14	X	X		X
	Q86YT9	Junctional adhesion molecule-like OS=Homo sapiens OX=9606 GN=JAML PE=1 SV=1	JAML				X
	P42126	Enoyl-CoA delta isomerase 1, mitochondrial OS=Homo sapiens OX=9606 GN=ECI1 PE=1 SV=1	ECI1				X
	P31948	Stress-induced-phosphoprotein 1 OS=Homo sapiens OX=9606 GN=STIP1 PE=1 SV=1	STIP1			X
	O75347	Tubulin-specific chaperone A OS=Homo sapiens OX=9606 GN=TBCA PE=1 SV=3	TBCA			X	X
	O75503	Ceroid-lipofuscinosis neuronal protein 5 OS=Homo sapiens OX=9606 GN=CLN5 PE=1 SV=2	CLN5				X
	P05019	Insulin-like growth factor I OS=Homo sapiens OX=9606 GN=IGF1 PE=1 SV=1	IGF1		X
	P47755	F-actin-capping protein subunit alpha-2 OS=Homo sapiens OX=9606 GN=CAPZA2 PE=1 SV=3	CAPZA2				X
	P29966	Myristoylated alanine-rich C-kinase substrate OS=Homo sapiens OX=9606 GN=MARCKS PE=1 SV=4	MARCKS				X
	O15145	Actin-related protein 2/3 complex subunit 3 OS=Homo sapiens OX=9606 GN=ARPC3 PE=1 SV=3	ARPC3		X	X
	P04211	Immunoglobulin lambda variable 7-43 OS=Homo sapiens OX=9606 GN=IGLV7-43 PE=3 SV=2	IGLV7-43	X	X
	Q13630	GDP-L-fucose synthase OS=Homo sapiens OX=9606 GN=TSTA3 PE=1 SV=1	TSTA3				X
	O75023	Leukocyte immunoglobulin-like receptor subfamily B member 5 OS=Homo sapiens OX=9606 GN=LILRB5 PE=1 SV=1	LILRB5			X	X
	Q99439	Calponin-2 OS=Homo sapiens OX=9606 GN=CNN2 PE=1 SV=4	CNN2			X	X
	Q0ZGT2	Nexilin OS=Homo sapiens OX=9606 GN=NEXN PE=1 SV=1	NEXN			X	X
	Q15223	Nectin-1 OS=Homo sapiens OX=9606 GN=NECTIN1 PE=1 SV=3	NECTIN1			X	X
	Q15691	Microtubule-associated protein RP/EB family member 1 OS=Homo sapiens OX=9606 GN=MAPRE1 PE=1 SV=3	MAPRE1			X
	P12110	Collagen alpha-2(VI) chain OS=Homo sapiens OX=9606 GN=COL6A2 PE=1 SV=4	COL6A2				X
	P07108	Acyl-CoA-binding protein OS=Homo sapiens OX=9606 GN=DBI PE=1 SV=2	DBI			X	X
	Q03167	Transforming growth factor beta receptor type 3 OS=Homo sapiens OX=9606 GN=TGFBR3 PE=1 SV=3	TGFBR3			X	X
	Q9UKY3	Putative inactive carboxylesterase 4 OS=Homo sapiens OX=9606 GN=CES1P1 PE=5 SV=2	CES1P1				X
	P14209	CD99 antigen OS=Homo sapiens OX=9606 GN=CD99 PE=1 SV=1	CD99				X
	A0A0C4DH26	Probable non-functional immunoglobulin kappa variable 6D-41 OS=Homo sapiens OX=9606 GN=IGKV6D-41 PE=5 SV=1	IGKV6D-41	X	X
	P14778	Interleukin-1 receptor type 1 OS=Homo sapiens OX=9606 GN=IL1R1 PE=1 SV=1	IL1R1				X
	P01036	Cystatin-S OS=Homo sapiens OX=9606 GN=CST4 PE=1 SV=3	CST4				X
	Q9UBX1	Cathepsin F OS=Homo sapiens OX=9606 GN=CTSF PE=1 SV=1	CTSF			X	X
	P08648	Integrin alpha-5 OS=Homo sapiens OX=9606 GN=ITGA5 PE=1 SV=2	ITGA5				X
	Q8WZA1	Protein O-linked-mannose beta-1,2-N-acetylglucosaminyltransferase 1 OS=Homo sapiens OX=9606 GN=POMGNT1 PE=1 SV=2	POMGNT1				X
	Q13421	Mesothelin OS=Homo sapiens OX=9606 GN=MSLN PE=1 SV=2	MSLN				X
	Q9H0W9	Ester hydrolase C11orf54 OS=Homo sapiens OX=9606 GN=C11orf54 PE=1 SV=1	C11orf54				X
	Q9BRA2	Thioredoxin domain-containing protein 17 OS=Homo sapiens OX=9606 GN=TXNDC17 PE=1 SV=1	TXNDC17				X
	A0A075B6I9	Immunoglobulin lambda variable 7-46 OS=Homo sapiens OX=9606 GN=IGLV7-46 PE=3 SV=4	IGLV7-46	X	X
	Q9HC56	Protocadherin-9 OS=Homo sapiens OX=9606 GN=PCDH9 PE=1 SV=2	PCDH9				X
	Q9H3S4	Thiamin pyrophosphokinase 1 OS=Homo sapiens OX=9606 GN=TPK1 PE=1 SV=1	TPK1				X
	Q96J42	Thioredoxin domain-containing protein 15 OS=Homo sapiens OX=9606 GN=TXNDC15 PE=1 SV=1	TXNDC15				X
	P18827	Syndecan-1 OS=Homo sapiens OX=9606 GN=SDC1 PE=1 SV=3	SDC1				X
	P30040	Endoplasmic reticulum resident protein 29 OS=Homo sapiens OX=9606 GN=ERP29 PE=1 SV=4	ERP29				X
	P39059	Collagen alpha-1(XV) chain OS=Homo sapiens OX=9606 GN=COL15A1 PE=1 SV=2	COL15A1				X
	P49407	Beta-arrestin-1 OS=Homo sapiens OX=9606 GN=ARRB1 PE=1 SV=2	ARRB1	X		X	X
	Q06187	Tyrosine-protein kinase BTK OS=Homo sapiens OX=9606 GN=BTK PE=1 SV=3	BTK			X
	P06315	Immunoglobulin kappa variable 5-2 OS=Homo sapiens OX=9606 GN=IGKV5-2 PE=1 SV=1	IGKV5-2	X
	P23526	Adenosylhomocysteinase OS=Homo sapiens OX=9606 GN=AHCY PE=1 SV=4	AHCY			X	X
	Q8IZP2	Putative protein FAM10A4 OS=Homo sapiens OX=9606 GN=ST13P4 PE=5 SV=1	ST13P4			X
	Q15149	Plectin OS=Homo sapiens OX=9606 GN=PLEC PE=1 SV=3	PLEC			X	X
	P53004	Biliverdin reductase A OS=Homo sapiens OX=9606 GN=BLVRA PE=1 SV=2	BLVRA				X
	O75874	Isocitrate dehydrogenase [NADP] cytoplasmic OS=Homo sapiens OX=9606 GN=IDH1 PE=1 SV=2	IDH1			X
	Q86TY3	Armadillo-like helical domain-containing protein 4 OS=Homo sapiens OX=9606 GN=ARMH4 PE=1 SV=1	ARMH4				X
	P48551	Interferon alpha/beta receptor 2 OS=Homo sapiens OX=9606 GN=IFNAR2 PE=1 SV=1	IFNAR2				X
	P15289	Arylsulfatase A OS=Homo sapiens OX=9606 GN=ARSA PE=1 SV=3	ARSA				X
	Q15746	Myosin light chain kinase, smooth muscle OS=Homo sapiens OX=9606 GN=MYLK PE=1 SV=4	MYLK			X	X
	Q96FE7	Phosphoinositide-3-kinase-interacting protein 1 OS=Homo sapiens OX=9606 GN=PIK3IP1 PE=1 SV=2	PIK3IP1				X
	P45877	Peptidyl-prolyl cis-trans isomerase C OS=Homo sapiens OX=9606 GN=PPIC PE=1 SV=1	PPIC				X
	P35052	Glypican-1 OS=Homo sapiens OX=9606 GN=GPC1 PE=1 SV=2	GPC1				X
	A0A075B6I1	Immunoglobulin lambda variable 4-60 OS=Homo sapiens OX=9606 GN=IGLV4-60 PE=3 SV=1	IGLV4-60	X	X	X
	P62491	Ras-related protein Rab-11A OS=Homo sapiens OX=9606 GN=RAB11A PE=1 SV=3	RAB11A	X		X
	Q6VAB6	Kinase suppressor of Ras 2 OS=Homo sapiens OX=9606 GN=KSR2 PE=1 SV=2	KSR2	X	X	X	X
	Q9BYH1	Seizure 6-like protein OS=Homo sapiens OX=9606 GN=SEZ6L PE=1 SV=1	SEZ6L				X
	P49721	Proteasome subunit beta type-2 OS=Homo sapiens OX=9606 GN=PSMB2 PE=1 SV=1	PSMB2				X
	Q96EE4	Coiled-coil domain-containing protein 126 OS=Homo sapiens OX=9606 GN=CCDC126 PE=2 SV=2	CCDC126				X
	P10644	cAMP-dependent protein kinase type I-alpha regulatory subunit OS=Homo sapiens OX=9606 GN=PRKAR1A PE=1 SV=1	PRKAR1A			X	X
	Q9BS26	Endoplasmic reticulum resident protein 44 OS=Homo sapiens OX=9606 GN=ERP44 PE=1 SV=1	ERP44				X
	P16035	Metalloproteinase inhibitor 2 OS=Homo sapiens OX=9606 GN=TIMP2 PE=1 SV=2	TIMP2		X	X
	P28161	Glutathione S-transferase Mu 2 OS=Homo sapiens OX=9606 GN=GSTM2 PE=1 SV=2	GSTM2				X
	A0A075B6I4	Immunoglobulin lambda variable 10-54 OS=Homo sapiens OX=9606 GN=IGLV10-54 PE=3 SV=1	IGLV10-54	X
	Q8WWY7	WAP four-disulfide core domain protein 12 OS=Homo sapiens OX=9606 GN=WFDC12 PE=1 SV=1	WFDC12				X
	P58335	Anthrax toxin receptor 2 OS=Homo sapiens OX=9606 GN=ANTXR2 PE=1 SV=5	ANTXR2		X
	A0A0G2JS06	Immunoglobulin lambda variable 5-39 OS=Homo sapiens OX=9606 GN=IGLV5-39 PE=3 SV=1	IGLV5-39	X	X
	Q9GZP4	PITH domain-containing protein 1 OS=Homo sapiens OX=9606 GN=PITHD1 PE=1 SV=1	PITHD1				X
	Q9NZN3	EH domain-containing protein 3 OS=Homo sapiens OX=9606 GN=EHD3 PE=1 SV=2	EHD3			X	X
	A0A075B6H7	Probable non-functional immunoglobulin kappa variable 3-7 OS=Homo sapiens OX=9606 GN=IGKV3-7 PE=5 SV=1	IGKV3-7	X	X
	O95274	Ly6/PLAUR domain-containing protein 3 OS=Homo sapiens OX=9606 GN=LYPD3 PE=1 SV=2	LYPD3				X
	Q8N1Q1	Carbonic anhydrase 13 OS=Homo sapiens OX=9606 GN=CA13 PE=1 SV=1	CA13				X
	Q16778	Histone H2B type 2-E OS=Homo sapiens OX=9606 GN=HIST2H2BE PE=1 SV=3	HIST2H2BE			X
	Q6EEV6	Small ubiquitin-related modifier 4 OS=Homo sapiens OX=9606 GN=SUMO4 PE=1 SV=2	SUMO4				X
	Q9Y547	Intraflagellar transport protein 25 homolog OS=Homo sapiens OX=9606 GN=HSPB11 PE=1 SV=1	HSPB11				X
	Q96G03	Phosphoglucomutase-2 OS=Homo sapiens OX=9606 GN=PGM2 PE=1 SV=4	PGM2	X	X	X	X
	Q92956	Tumor necrosis factor receptor superfamily member 14 OS=Homo sapiens OX=9606 GN=TNFRSF14 PE=1 SV=3	TNFRSF14				X
	Q96BZ4	5'-3' exonuclease PLD4 OS=Homo sapiens OX=9606 GN=PLD4 PE=2 SV=2	PLD4			X	X
	Q9H6X2	Anthrax toxin receptor 1 OS=Homo sapiens OX=9606 GN=ANTXR1 PE=1 SV=2	ANTXR1		X		X
	Q86SF2	N-acetylgalactosaminyltransferase 7 OS=Homo sapiens OX=9606 GN=GALNT7 PE=1 SV=1	GALNT7				X
	Q92876	Kallikrein-6 OS=Homo sapiens OX=9606 GN=KLK6 PE=1 SV=1	KLK6				X
	Q9NP78	ATP-binding cassette sub-family B member 9 OS=Homo sapiens OX=9606 GN=ABCB9 PE=1 SV=1	ABCB9	X	X	X
	Q12931	Heat shock protein 75 kDa, mitochondrial OS=Homo sapiens OX=9606 GN=TRAP1 PE=1 SV=3	TRAP1			X	X
	P11766	Alcohol dehydrogenase class-3 OS=Homo sapiens OX=9606 GN=ADH5 PE=1 SV=4	ADH5			X	X
	Q6UXD5	Seizure 6-like protein 2 OS=Homo sapiens OX=9606 GN=SEZ6L2 PE=1 SV=2	SEZ6L2				X
	P22413	Ectonucleotide pyrophosphatase/phosphodiesterase family member 1 OS=Homo sapiens OX=9606 GN=ENPP1 PE=1 SV=2	ENPP1				X
	P35247	Pulmonary surfactant-associated protein D OS=Homo sapiens OX=9606 GN=SFTPD PE=1 SV=3	SFTPD				X
	Q96AP7	Endothelial cell-selective adhesion molecule OS=Homo sapiens OX=9606 GN=ESAM PE=1 SV=1	ESAM				X
	P62805	Histone H4 OS=Homo sapiens OX=9606 GN=H4C1 PE=1 SV=2	H4C1	X		X
	P36871	Phosphoglucomutase-1 OS=Homo sapiens OX=9606 GN=PGM1 PE=1 SV=3	PGM1			X	X
	P15090	Fatty acid-binding protein, adipocyte OS=Homo sapiens OX=9606 GN=FABP4 PE=1 SV=3	FABP4				X
	O95967	EGF-containing fibulin-like extracellular matrix protein 2 OS=Homo sapiens OX=9606 GN=EFEMP2 PE=1 SV=3	EFEMP2				X
	P00352	Retinal dehydrogenase 1 OS=Homo sapiens OX=9606 GN=ALDH1A1 PE=1 SV=2	ALDH1A1			X
	P08572	Collagen alpha-2(IV) chain OS=Homo sapiens OX=9606 GN=COL4A2 PE=1 SV=4	COL4A2				X
	Q13232	Nucleoside diphosphate kinase 3 OS=Homo sapiens OX=9606 GN=NME3 PE=1 SV=2	NME3				X
	Q5VTT5	Myomesin-3 OS=Homo sapiens OX=9606 GN=MYOM3 PE=1 SV=1	MYOM3				X
	Q9UJA9	Ectonucleotide pyrophosphatase/phosphodiesterase family member 5 OS=Homo sapiens OX=9606 GN=ENPP5 PE=1 SV=1	ENPP5				X
	O15117	FYN-binding protein 1 OS=Homo sapiens OX=9606 GN=FYB1 PE=1 SV=2	FYB1			X
	Q14112	Nidogen-2 OS=Homo sapiens OX=9606 GN=NID2 PE=1 SV=3	NID2				X
	P20618	Proteasome subunit beta type-1 OS=Homo sapiens OX=9606 GN=PSMB1 PE=1 SV=2	PSMB1		X	X	X
	O14960	Leukocyte cell-derived chemotaxin-2 OS=Homo sapiens OX=9606 GN=LECT2 PE=1 SV=2	LECT2		X	X
	P28065	Proteasome subunit beta type-9 OS=Homo sapiens OX=9606 GN=PSMB9 PE=1 SV=2	PSMB9				X
	Q13404	Ubiquitin-conjugating enzyme E2 variant 1 OS=Homo sapiens OX=9606 GN=UBE2V1 PE=1 SV=2	UBE2V1			X	X
	P07307	Asialoglycoprotein receptor 2 OS=Homo sapiens OX=9606 GN=ASGR2 PE=1 SV=2	ASGR2				X
	Q15762	CD226 antigen OS=Homo sapiens OX=9606 GN=CD226 PE=1 SV=2	CD226				X
	P25788	Proteasome subunit alpha type-3 OS=Homo sapiens OX=9606 GN=PSMA3 PE=1 SV=2	PSMA3				X
	Q9HC84	Mucin-5B OS=Homo sapiens OX=9606 GN=MUC5B PE=1 SV=3	MUC5B				X
	Q14165	Malectin OS=Homo sapiens OX=9606 GN=MLEC PE=1 SV=1	MLEC				X
	Q5SY68	Protein S100-A7-like 2 OS=Homo sapiens OX=9606 GN=S100A7L2 PE=1 SV=1	S100A7L2				X
	O43432	Eukaryotic translation initiation factor 4 gamma 3 OS=Homo sapiens OX=9606 GN=EIF4G3 PE=1 SV=2	EIF4G3	X	X
	Q6GTX8	Leukocyte-associated immunoglobulin-like receptor 1 OS=Homo sapiens OX=9606 GN=LAIR1 PE=1 SV=1	LAIR1				X
	O00602	Ficolin-1 OS=Homo sapiens OX=9606 GN=FCN1 PE=1 SV=2	FCN1				X
	P27105	Erythrocyte band 7 integral membrane protein OS=Homo sapiens OX=9606 GN=STOM PE=1 SV=3	STOM	X
	P98095	Fibulin-2 OS=Homo sapiens OX=9606 GN=FBLN2 PE=1 SV=2	FBLN2				X
	Q9Y320	Thioredoxin-related transmembrane protein 2 OS=Homo sapiens OX=9606 GN=TMX2 PE=1 SV=1	TMX2	X		X	X
	P14384	Carboxypeptidase M OS=Homo sapiens OX=9606 GN=CPM PE=1 SV=2	CPM				X
	Q8WWV6	High affinity immunoglobulin alpha and immunoglobulin mu Fc receptor OS=Homo sapiens OX=9606 GN=FCAMR PE=1 SV=1	FCAMR				X
	P00451	Coagulation factor VIII OS=Homo sapiens OX=9606 GN=F8 PE=1 SV=1	F8			X	X
	Q9C0B1	Alpha-ketoglutarate-dependent dioxygenase FTO OS=Homo sapiens OX=9606 GN=FTO PE=1 SV=3	FTO	X	X	X	X
	Q15517	Corneodesmosin OS=Homo sapiens OX=9606 GN=CDSN PE=1 SV=3	CDSN				X
	Q12864	Cadherin-17 OS=Homo sapiens OX=9606 GN=CDH17 PE=2 SV=3	CDH17				X
	Q96CN7	Isochorismatase domain-containing protein 1 OS=Homo sapiens OX=9606 GN=ISOC1 PE=1 SV=3	ISOC1				X
	O43639	Cytoplasmic protein NCK2 OS=Homo sapiens OX=9606 GN=NCK2 PE=1 SV=2	NCK2			X	X
	P54819	Adenylate kinase 2, mitochondrial OS=Homo sapiens OX=9606 GN=AK2 PE=1 SV=2	AK2			X	X
	P05164	Myeloperoxidase OS=Homo sapiens OX=9606 GN=MPO PE=1 SV=1	MPO			X
	Q9NP58	ATP-binding cassette sub-family B member 6, mitochondrial OS=Homo sapiens OX=9606 GN=ABCB6 PE=1 SV=1	ABCB6	X		X
	P06703	Protein S100-A6 OS=Homo sapiens OX=9606 GN=S100A6 PE=1 SV=1	S100A6	X	X	X	X
	P59190	Ras-related protein Rab-15 OS=Homo sapiens OX=9606 GN=RAB15 PE=1 SV=1	RAB15	X	X	X
	P00387	NADH-cytochrome b5 reductase 3 OS=Homo sapiens OX=9606 GN=CYB5R3 PE=1 SV=3	CYB5R3				X
	Q96C23	Aldose 1-epimerase OS=Homo sapiens OX=9606 GN=GALM PE=1 SV=1	GALM				X
	P17301	Integrin alpha-2 OS=Homo sapiens OX=9606 GN=ITGA2 PE=1 SV=1	ITGA2				X
	O95897	Noelin-2 OS=Homo sapiens OX=9606 GN=OLFM2 PE=1 SV=2	OLFM2				X
	Q14162	Scavenger receptor class F member 1 OS=Homo sapiens OX=9606 GN=SCARF1 PE=1 SV=3	SCARF1				X
	P48059	LIM and senescent cell antigen-like-containing domain protein 1 OS=Homo sapiens OX=9606 GN=LIMS1 PE=1 SV=4	LIMS1		X	X
	P14780	Matrix metalloproteinase-9 OS=Homo sapiens OX=9606 GN=MMP9 PE=1 SV=3	MMP9				X
	Q32MZ4	Leucine-rich repeat flightless-interacting protein 1 OS=Homo sapiens OX=9606 GN=LRRFIP1 PE=1 SV=2	LRRFIP1				X
	Q13642	Four and a half LIM domains protein 1 OS=Homo sapiens OX=9606 GN=FHL1 PE=1 SV=4	FHL1			X	X
	Q8WVN6	Secreted and transmembrane protein 1 OS=Homo sapiens OX=9606 GN=SECTM1 PE=1 SV=2	SECTM1				X
	A6NI73	Leukocyte immunoglobulin-like receptor subfamily A member 5 OS=Homo sapiens OX=9606 GN=LILRA5 PE=1 SV=1	LILRA5				X
	Q9UJC5	SH3 domain-binding glutamic acid-rich-like protein 2 OS=Homo sapiens OX=9606 GN=SH3BGRL2 PE=1 SV=2	SH3BGRL2				X
	P05060	Secretogranin-1 OS=Homo sapiens OX=9606 GN=CHGB PE=1 SV=2	CHGB				X
	P78504	Protein jagged-1 OS=Homo sapiens OX=9606 GN=JAG1 PE=1 SV=3	JAG1				X
	Q16394	Exostosin-1 OS=Homo sapiens OX=9606 GN=EXT1 PE=1 SV=2	EXT1				X
	P07148	Fatty acid-binding protein, liver OS=Homo sapiens OX=9606 GN=FABP1 PE=1 SV=1	FABP1				X
	Q9UGM3	Deleted in malignant brain tumors 1 protein OS=Homo sapiens OX=9606 GN=DMBT1 PE=1 SV=2	DMBT1				X
	Q66K66	Transmembrane protein 198 OS=Homo sapiens OX=9606 GN=TMEM198 PE=1 SV=1	TMEM198	X	X
	O00115	Deoxyribonuclease-2-alpha OS=Homo sapiens OX=9606 GN=DNASE2 PE=1 SV=2	DNASE2				X
	Q8N3T6	Transmembrane protein 132C OS=Homo sapiens OX=9606 GN=TMEM132C PE=2 SV=3	TMEM132C				X
	P00367	Glutamate dehydrogenase 1, mitochondrial OS=Homo sapiens OX=9606 GN=GLUD1 PE=1 SV=2	GLUD1				X
	P98172	Ephrin-B1 OS=Homo sapiens OX=9606 GN=EFNB1 PE=1 SV=1	EFNB1				X
	P24298	Alanine aminotransferase 1 OS=Homo sapiens OX=9606 GN=GPT PE=1 SV=3	GPT				X
	Q15043	Zinc transporter ZIP14 OS=Homo sapiens OX=9606 GN=SLC39A14 PE=1 SV=3	SLC39A14				X
	Q16777	Histone H2A type 2-C OS=Homo sapiens OX=9606 GN=HIST2H2AC PE=1 SV=4	HIST2H2AC			X
	P08833	Insulin-like growth factor-binding protein 1 OS=Homo sapiens OX=9606 GN=IGFBP1 PE=1 SV=1	IGFBP1				X
	P10646-2	Isoform Beta of Tissue factor pathway inhibitor OS=Homo sapiens OX=9606 GN=TFPI	TFPI		X	X
	O00748	Cocaine esterase OS=Homo sapiens OX=9606 GN=CES2 PE=1 SV=1	CES2				X
	Q8IW75	Serpin A12 OS=Homo sapiens OX=9606 GN=SERPINA12 PE=1 SV=1	SERPINA12				X
	P25789	Proteasome subunit alpha type-4 OS=Homo sapiens OX=9606 GN=PSMA4 PE=1 SV=1	PSMA4			X	X
	Q02818	Nucleobindin-1 OS=Homo sapiens OX=9606 GN=NUCB1 PE=1 SV=4	NUCB1		X	X
	Q9BQR3	Serine protease 27 OS=Homo sapiens OX=9606 GN=PRSS27 PE=1 SV=1	PRSS27	X
	Q7Z7M9	Polypeptide N-acetylgalactosaminyltransferase 5 OS=Homo sapiens OX=9606 GN=GALNT5 PE=1 SV=1	GALNT5				X
	Q9GZT8	NIF3-like protein 1 OS=Homo sapiens OX=9606 GN=NIF3L1 PE=1 SV=2	NIF3L1				X
	P41226	Ubiquitin-like modifier-activating enzyme 7 OS=Homo sapiens OX=9606 GN=UBA7 PE=1 SV=2	UBA7				X
	P37840	Alpha-synuclein OS=Homo sapiens OX=9606 GN=SNCA PE=1 SV=1	SNCA			X
	P17050	Alpha-N-acetylgalactosaminidase OS=Homo sapiens OX=9606 GN=NAGA PE=1 SV=2	NAGA				X
	Q14767	Latent-transforming growth factor beta-binding protein 2 OS=Homo sapiens OX=9606 GN=LTBP2 PE=1 SV=3	LTBP2				X
	P05981	Serine protease hepsin OS=Homo sapiens OX=9606 GN=HPN PE=1 SV=1	HPN		X
	P35556	Fibrillin-2 OS=Homo sapiens OX=9606 GN=FBN2 PE=1 SV=3	FBN2				X
	Q9NQH7	Xaa-Pro aminopeptidase 3 OS=Homo sapiens OX=9606 GN=XPNPEP3 PE=1 SV=1	XPNPEP3		X	X	X
	Q96DR8	Mucin-like protein 1 OS=Homo sapiens OX=9606 GN=MUCL1 PE=1 SV=1	MUCL1				X
	Q8NFZ8	Cell adhesion molecule 4 OS=Homo sapiens OX=9606 GN=CADM4 PE=1 SV=1	CADM4				X
	Q9Y5F6-2	Isoform 2 of Protocadherin gamma-C5 OS=Homo sapiens OX=9606 GN=PCDHGC5	PCDHGC5	X	X
	P55822	SH3 domain-binding glutamic acid-rich protein OS=Homo sapiens OX=9606 GN=SH3BGR PE=2 SV=3	SH3BGR				X
	P55145	Mesencephalic astrocyte-derived neurotrophic factor OS=Homo sapiens OX=9606 GN=MANF PE=1 SV=3	MANF			X
	Q99574	Neuroserpin OS=Homo sapiens OX=9606 GN=SERPINI1 PE=1 SV=1	SERPINI1				X
	Q96AQ7	Cell death activator CIDE-3 OS=Homo sapiens OX=9606 GN=CIDEC PE=1 SV=1	CIDEC			X	X
	O14798	Tumor necrosis factor receptor superfamily member 10C OS=Homo sapiens OX=9606 GN=TNFRSF10C PE=1 SV=3	TNFRSF10C				X
	P03973	Antileukoproteinase OS=Homo sapiens OX=9606 GN=SLPI PE=1 SV=2	SLPI		X
	Q9H8J5	MANSC domain-containing protein 1 OS=Homo sapiens OX=9606 GN=MANSC1 PE=2 SV=1	MANSC1				X
	P01589	Interleukin-2 receptor subunit alpha OS=Homo sapiens OX=9606 GN=IL2RA PE=1 SV=1	IL2RA				X
	Q9ULC0	Endomucin OS=Homo sapiens OX=9606 GN=EMCN PE=1 SV=2	EMCN			X	X
	Q9H3W5	Leucine-rich repeat neuronal protein 3 OS=Homo sapiens OX=9606 GN=LRRN3 PE=2 SV=1	LRRN3				X
	Q08345	Epithelial discoidin domain-containing receptor 1 OS=Homo sapiens OX=9606 GN=DDR1 PE=1 SV=1	DDR1				X
	O75390	Citrate synthase, mitochondrial OS=Homo sapiens OX=9606 GN=CS PE=1 SV=2	CS				X
	P20142	Gastricsin OS=Homo sapiens OX=9606 GN=PGC PE=1 SV=1	PGC				X
	Q9BRF8	Serine/threonine-protein phosphatase CPPED1 OS=Homo sapiens OX=9606 GN=CPPED1 PE=1 SV=3	CPPED1				X
	Q9NNX6	CD209 antigen OS=Homo sapiens OX=9606 GN=CD209 PE=1 SV=1	CD209		X	X	X
	P55287	Cadherin-11 OS=Homo sapiens OX=9606 GN=CDH11 PE=1 SV=2	CDH11			X	X
	Q9Y275	Tumor necrosis factor ligand superfamily member 13B OS=Homo sapiens OX=9606 GN=TNFSF13B PE=1 SV=1	TNFSF13B				X
	P36269	Glutathione hydrolase 5 proenzyme OS=Homo sapiens OX=9606 GN=GGT5 PE=1 SV=2	GGT5				X
	P20062	Transcobalamin-2 OS=Homo sapiens OX=9606 GN=TCN2 PE=1 SV=3	TCN2			X	X
	P25815	Protein S100-P OS=Homo sapiens OX=9606 GN=S100P PE=1 SV=2	S100P				X
	Q92896	Golgi apparatus protein 1 OS=Homo sapiens OX=9606 GN=GLG1 PE=1 SV=2	GLG1				X
	P11169	Solute carrier family 2, facilitated glucose transporter member 3 OS=Homo sapiens OX=9606 GN=SLC2A3 PE=1 SV=1	SLC2A3	X
	Q7Z5L0	Vitelline membrane outer layer protein 1 homolog OS=Homo sapiens OX=9606 GN=VMO1 PE=1 SV=1	VMO1				X
	Q9NTN9	Semaphorin-4G OS=Homo sapiens OX=9606 GN=SEMA4G PE=1 SV=1	SEMA4G				X
	Q8N3J6	Cell adhesion molecule 2 OS=Homo sapiens OX=9606 GN=CADM2 PE=2 SV=1	CADM2				X
	Q96P31	Fc receptor-like protein 3 OS=Homo sapiens OX=9606 GN=FCRL3 PE=1 SV=1	FCRL3	X	X
	Q8TDQ0	Hepatitis A virus cellular receptor 2 OS=Homo sapiens OX=9606 GN=HAVCR2 PE=1 SV=3	HAVCR2				X
	P42081	T-lymphocyte activation antigen CD86 OS=Homo sapiens OX=9606 GN=CD86 PE=1 SV=2	CD86				X
	P08493	Matrix Gla protein OS=Homo sapiens OX=9606 GN=MGP PE=1 SV=2	MGP	X	X	X
	O60234	Glia maturation factor gamma OS=Homo sapiens OX=9606 GN=GMFG PE=1 SV=1	GMFG			X	X
	Q14574	Desmocollin-3 OS=Homo sapiens OX=9606 GN=DSC3 PE=1 SV=3	DSC3			X
	Q9UHJ6	Sedoheptulokinase OS=Homo sapiens OX=9606 GN=SHPK PE=1 SV=3	SHPK				X
	P05386	60S acidic ribosomal protein P1 OS=Homo sapiens OX=9606 GN=RPLP1 PE=1 SV=1	RPLP1	X
	Q16651	Prostasin OS=Homo sapiens OX=9606 GN=PRSS8 PE=1 SV=1	PRSS8				X
	Q92887	Canalicular multispecific organic anion transporter 1 OS=Homo sapiens OX=9606 GN=ABCC2 PE=1 SV=3	ABCC2	X
	Q96H15	T-cell immunoglobulin and mucin domain-containing protein 4 OS=Homo sapiens OX=9606 GN=TIMD4 PE=1 SV=2	TIMD4				X
	Q8NCY6	Myb/SANT-like DNA-binding domain-containing protein 4 OS=Homo sapiens OX=9606 GN=MSANTD4 PE=1 SV=1	MSANTD4	X	X		X
	Q92686	Neurogranin OS=Homo sapiens OX=9606 GN=NRGN PE=1 SV=1	NRGN	X	X	X
	Q3LXA3	Triokinase/FMN cyclase OS=Homo sapiens OX=9606 GN=TKFC PE=1 SV=2	TKFC			X
	O43488	Aflatoxin B1 aldehyde reductase member 2 OS=Homo sapiens OX=9606 GN=AKR7A2 PE=1 SV=3	AKR7A2			X
	Q14508	WAP four-disulfide core domain protein 2 OS=Homo sapiens OX=9606 GN=WFDC2 PE=1 SV=2	WFDC2				X
	O75976	Carboxypeptidase D OS=Homo sapiens OX=9606 GN=CPD PE=1 SV=2	CPD				X
	Q8NHP8	Putative phospholipase B-like 2 OS=Homo sapiens OX=9606 GN=PLBD2 PE=1 SV=2	PLBD2				X
	P16444	Dipeptidase 1 OS=Homo sapiens OX=9606 GN=DPEP1 PE=1 SV=3	DPEP1				X
	Q969T7	7-methylguanosine phosphate-specific 5'-nucleotidase OS=Homo sapiens OX=9606 GN=NT5C3B PE=1 SV=4	NT5C3B	X	X	X	X
	P07311	Acylphosphatase-1 OS=Homo sapiens OX=9606 GN=ACYP1 PE=1 SV=2	ACYP1				X
	Q6P4E1	Protein CASC4 OS=Homo sapiens OX=9606 GN=CASC4 PE=1 SV=2	CASC4				X
	P29350	Tyrosine-protein phosphatase non-receptor type 6 OS=Homo sapiens OX=9606 GN=PTPN6 PE=1 SV=1	PTPN6			X
	Q8IYE1	Coiled-coil domain-containing protein 13 OS=Homo sapiens OX=9606 GN=CCDC13 PE=1 SV=2	CCDC13	X
	Q9GZX9	Twisted gastrulation protein homolog 1 OS=Homo sapiens OX=9606 GN=TWSG1 PE=1 SV=1	TWSG1				X
	Q01973	Inactive tyrosine-protein kinase transmembrane receptor ROR1 OS=Homo sapiens OX=9606 GN=ROR1 PE=1 SV=2	ROR1				X
	Q8N5R6	Coiled-coil domain-containing protein 33 OS=Homo sapiens OX=9606 GN=CCDC33 PE=1 SV=3	CCDC33		X	X	X
	P51149	Ras-related protein Rab-7a OS=Homo sapiens OX=9606 GN=RAB7A PE=1 SV=1	RAB7A			X
	P60842	Eukaryotic initiation factor 4A-I OS=Homo sapiens OX=9606 GN=EIF4A1 PE=1 SV=1	EIF4A1			X
	Q9NUQ9	Protein FAM49B OS=Homo sapiens OX=9606 GN=FAM49B PE=1 SV=1	FAM49B				X
	P08138	Tumor necrosis factor receptor superfamily member 16 OS=Homo sapiens OX=9606 GN=NGFR PE=1 SV=1	NGFR				X
	Q13275	Semaphorin-3F OS=Homo sapiens OX=9606 GN=SEMA3F PE=2 SV=2	SEMA3F			X	X
	Q15019	Septin-2 OS=Homo sapiens OX=9606 GN=SEPTIN2 PE=1 SV=1	SEPTIN2			X
	Q96QU8	Exportin-6 OS=Homo sapiens OX=9606 GN=XPO6 PE=1 SV=1	XPO6				X
	Q86VD1	MORC family CW-type zinc finger protein 1 OS=Homo sapiens OX=9606 GN=MORC1 PE=2 SV=2	MORC1		X
	O43665	Regulator of G-protein signaling 10 OS=Homo sapiens OX=9606 GN=RGS10 PE=1 SV=3	RGS10			X	X
	Q92692	Nectin-2 OS=Homo sapiens OX=9606 GN=NECTIN2 PE=1 SV=1	NECTIN2				X
	Q86VQ0	Lebercilin OS=Homo sapiens OX=9606 GN=LCA5 PE=1 SV=2	LCA5			X
	Q9UQV4	Lysosome-associated membrane glycoprotein 3 OS=Homo sapiens OX=9606 GN=LAMP3 PE=1 SV=3	LAMP3				X
	Q2KHM9	Protein moonraker OS=Homo sapiens OX=9606 GN=KIAA0753 PE=1 SV=3	KIAA0753	X	X	X	X
	Q9UKJ1-3	Isoform 3 of Paired immunoglobulin-like type 2 receptor alpha OS=Homo sapiens OX=9606 GN=PILRA	PILRA			X	X
	Q9UN70	Protocadherin gamma-C3 OS=Homo sapiens OX=9606 GN=PCDHGC3 PE=1 SV=1	PCDHGC3				X
	A0A0A0MT89	Immunoglobulin kappa joining 1 OS=Homo sapiens OX=9606 GN=IGKJ1 PE=4 SV=2	IGKJ1	X	X
	Q15293	Reticulocalbin-1 OS=Homo sapiens OX=9606 GN=RCN1 PE=1 SV=1	RCN1				X
	Q9Y4F1	FERM, ARHGEF and pleckstrin domain-containing protein 1 OS=Homo sapiens OX=9606 GN=FARP1 PE=1 SV=1	FARP1	X
	P28074	Proteasome subunit beta type-5 OS=Homo sapiens OX=9606 GN=PSMB5 PE=1 SV=3	PSMB5			X
	Q5VZ46	Uncharacterized protein KIAA1614 OS=Homo sapiens OX=9606 GN=KIAA1614 PE=2 SV=3	KIAA1614				X
	Q9UNZ2	NSFL1 cofactor p47 OS=Homo sapiens OX=9606 GN=NSFL1C PE=1 SV=2	NSFL1C				X
	O75581	Low-density lipoprotein receptor-related protein 6 OS=Homo sapiens OX=9606 GN=LRP6 PE=1 SV=2	LRP6				X
	Q9UQ80	Proliferation-associated protein 2G4 OS=Homo sapiens OX=9606 GN=PA2G4 PE=1 SV=3	PA2G4			X
	P23381	Tryptophan--tRNA ligase, cytoplasmic OS=Homo sapiens OX=9606 GN=WARS PE=1 SV=2	WARS			X
	Q5JXB2	Putative ubiquitin-conjugating enzyme E2 N-like OS=Homo sapiens OX=9606 GN=UBE2NL PE=1 SV=1	UBE2NL		X
	Q9UHY1	Nuclear receptor-binding protein OS=Homo sapiens OX=9606 GN=NRBP1 PE=1 SV=1	NRBP1			X
	P25787	Proteasome subunit alpha type-2 OS=Homo sapiens OX=9606 GN=PSMA2 PE=1 SV=2	PSMA2				X
	Q96AD5	Patatin-like phospholipase domain-containing protein 2 OS=Homo sapiens OX=9606 GN=PNPLA2 PE=1 SV=1	PNPLA2	X	X	X
	Q5T750	Skin-specific protein 32 OS=Homo sapiens OX=9606 GN=XP32 PE=1 SV=1	XP32			X	X
	P61077	Ubiquitin-conjugating enzyme E2 D3 OS=Homo sapiens OX=9606 GN=UBE2D3 PE=1 SV=1	UBE2D3				X
	Q7L7V1	Putative pre-mRNA-splicing factor ATP-dependent RNA helicase DHX32 OS=Homo sapiens OX=9606 GN=DHX32 PE=1 SV=1	DHX32		X	X	X
	P21926	CD9 antigen OS=Homo sapiens OX=9606 GN=CD9 PE=1 SV=4	CD9	X
	P51858	Hepatoma-derived growth factor OS=Homo sapiens OX=9606 GN=HDGF PE=1 SV=1	HDGF				X
	Q9Y5Z4	Heme-binding protein 2 OS=Homo sapiens OX=9606 GN=HEBP2 PE=1 SV=1	HEBP2				X
	Q8IUB2	WAP four-disulfide core domain protein 3 OS=Homo sapiens OX=9606 GN=WFDC3 PE=2 SV=1	WFDC3	X	X	X	X
	A5D6W6	Fat storage-inducing transmembrane protein 1 OS=Homo sapiens OX=9606 GN=FITM1 PE=2 SV=1	FITM1	X			X
	Q8TEA8	D-aminoacyl-tRNA deacylase 1 OS=Homo sapiens OX=9606 GN=DTD1 PE=1 SV=2	DTD1			X
	P17181	Interferon alpha/beta receptor 1 OS=Homo sapiens OX=9606 GN=IFNAR1 PE=1 SV=3	IFNAR1				X
	O60242	Adhesion G protein-coupled receptor B3 OS=Homo sapiens OX=9606 GN=ADGRB3 PE=1 SV=2	ADGRB3	X
	Q9NU22	Midasin OS=Homo sapiens OX=9606 GN=MDN1 PE=1 SV=2	MDN1	X
	Q15465	Sonic hedgehog protein OS=Homo sapiens OX=9606 GN=SHH PE=1 SV=1	SHH		X
	O75460	Serine/threonine-protein kinase/endoribonuclease IRE1 OS=Homo sapiens OX=9606 GN=ERN1 PE=1 SV=2	ERN1	X	X
	P22303	Acetylcholinesterase OS=Homo sapiens OX=9606 GN=ACHE PE=1 SV=1	ACHE				X
	Q01415	N-acetylgalactosamine kinase OS=Homo sapiens OX=9606 GN=GALK2 PE=1 SV=1	GALK2	X	X	X	X
	Q8TDJ6	DmX-like protein 2 OS=Homo sapiens OX=9606 GN=DMXL2 PE=1 SV=2	DMXL2			X
	P34932	Heat shock 70 kDa protein 4 OS=Homo sapiens OX=9606 GN=HSPA4 PE=1 SV=4	HSPA4			X	X
	Q147U7	Single-pass membrane and coiled-coil domain-containing protein 1 OS=Homo sapiens OX=9606 GN=SMCO1 PE=2 SV=2	SMCO1		X		X
	Q96HE9	Proline-rich protein 11 OS=Homo sapiens OX=9606 GN=PRR11 PE=1 SV=1	PRR11	X	X	X	X
	Q8NDA2	Hemicentin-2 OS=Homo sapiens OX=9606 GN=HMCN2 PE=2 SV=3	HMCN2				X
	O95185	Netrin receptor UNC5C OS=Homo sapiens OX=9606 GN=UNC5C PE=1 SV=2	UNC5C				X
	Q9GZX5	Zinc finger protein 350 OS=Homo sapiens OX=9606 GN=ZNF350 PE=1 SV=3	ZNF350	X	X
	P29279	CCN family member 2 OS=Homo sapiens OX=9606 GN=CCN2 PE=1 SV=2	CCN2				X
	Q8WUD4	Coiled-coil domain-containing protein 12 OS=Homo sapiens OX=9606 GN=CCDC12 PE=1 SV=1	CCDC12			X	X
	P43034	Platelet-activating factor acetylhydrolase IB subunit alpha OS=Homo sapiens OX=9606 GN=PAFAH1B1 PE=1 SV=2	PAFAH1B1			X
	P52848	Bifunctional heparan sulfate N-deacetylase/N-sulfotransferase 1 OS=Homo sapiens OX=9606 GN=NDST1 PE=1 SV=1	NDST1				X
	Q4G0P3	Hydrocephalus-inducing protein homolog OS=Homo sapiens OX=9606 GN=HYDIN PE=1 SV=3	HYDIN		X	X
	Q4G148	Glucoside xylosyltransferase 1 OS=Homo sapiens OX=9606 GN=GXYLT1 PE=1 SV=2	GXYLT1				X
	P41250	Glycine--tRNA ligase OS=Homo sapiens OX=9606 GN=GARS1 PE=1 SV=3	GARS1			X
	Q92485	Acid sphingomyelinase-like phosphodiesterase 3b OS=Homo sapiens OX=9606 GN=SMPDL3B PE=1 SV=2	SMPDL3B				X
	Q5U651	Ras-interacting protein 1 OS=Homo sapiens OX=9606 GN=RASIP1 PE=1 SV=1	RASIP1		X	X
	O14773	Tripeptidyl-peptidase 1 OS=Homo sapiens OX=9606 GN=TPP1 PE=1 SV=2	TPP1				X
	P00325	All-trans-retinol dehydrogenase [NAD(+)] ADH1B OS=Homo sapiens OX=9606 GN=ADH1B PE=1 SV=2	ADH1B	X		X
	P62714	Serine/threonine-protein phosphatase 2A catalytic subunit beta isoform OS=Homo sapiens OX=9606 GN=PPP2CB PE=1 SV=1	PPP2CB	X			X
	P82930	28S ribosomal protein S34, mitochondrial OS=Homo sapiens OX=9606 GN=MRPS34 PE=1 SV=2	MRPS34	X	X	X	X
	P54707	Potassium-transporting ATPase alpha chain 2 OS=Homo sapiens OX=9606 GN=ATP12A PE=1 SV=3	ATP12A	X	X	X	X
	P14770	Platelet glycoprotein IX OS=Homo sapiens OX=9606 GN=GP9 PE=1 SV=3	GP9	X
	P48643	T-complex protein 1 subunit epsilon OS=Homo sapiens OX=9606 GN=CCT5 PE=1 SV=1	CCT5			X
	P42574	Caspase-3 OS=Homo sapiens OX=9606 GN=CASP3 PE=1 SV=2	CASP3			X	X
	Q14002	Carcinoembryonic antigen-related cell adhesion molecule 7 OS=Homo sapiens OX=9606 GN=CEACAM7 PE=1 SV=1	CEACAM7	X
	Q9UBX5	Fibulin-5 OS=Homo sapiens OX=9606 GN=FBLN5 PE=1 SV=1	FBLN5	X
	Q9NQS3	Nectin-3 OS=Homo sapiens OX=9606 GN=NECTIN3 PE=1 SV=1	NECTIN3				X
	O75093	Slit homolog 1 protein OS=Homo sapiens OX=9606 GN=SLIT1 PE=2 SV=4	SLIT1			X	X
	P55774	C-C motif chemokine 18 OS=Homo sapiens OX=9606 GN=CCL18 PE=1 SV=1	CCL18	X
	Q9BY66	Lysine-specific demethylase 5D OS=Homo sapiens OX=9606 GN=KDM5D PE=1 SV=2	KDM5D	X	X	X	X
	O95633	Follistatin-related protein 3 OS=Homo sapiens OX=9606 GN=FSTL3 PE=1 SV=1	FSTL3				X
	Q06481	Amyloid-like protein 2 OS=Homo sapiens OX=9606 GN=APLP2 PE=1 SV=2	APLP2				X
	Q99466	Neurogenic locus notch homolog protein 4 OS=Homo sapiens OX=9606 GN=NOTCH4 PE=1 SV=2	NOTCH4				X
	Q9NUQ6	SPATS2-like protein OS=Homo sapiens OX=9606 GN=SPATS2L PE=1 SV=2	SPATS2L	X	X	X	X
	P48723	Heat shock 70 kDa protein 13 OS=Homo sapiens OX=9606 GN=HSPA13 PE=1 SV=1	HSPA13				X
	Q6P4A8	Phospholipase B-like 1 OS=Homo sapiens OX=9606 GN=PLBD1 PE=1 SV=2	PLBD1				X
	Q13291	Signaling lymphocytic activation molecule OS=Homo sapiens OX=9606 GN=SLAMF1 PE=1 SV=1	SLAMF1				X
	P80370	Protein delta homolog 1 OS=Homo sapiens OX=9606 GN=DLK1 PE=1 SV=3	DLK1				X
	Q96FW1	Ubiquitin thioesterase OTUB1 OS=Homo sapiens OX=9606 GN=OTUB1 PE=1 SV=2	OTUB1				X
	Q9NQQ7	Solute carrier family 35 member C2 OS=Homo sapiens OX=9606 GN=SLC35C2 PE=1 SV=2	SLC35C2	X
	Q495M3	Proton-coupled amino acid transporter 2 OS=Homo sapiens OX=9606 GN=SLC36A2 PE=1 SV=1	SLC36A2	X	X
	Q96D03	DNA damage-inducible transcript 4-like protein OS=Homo sapiens OX=9606 GN=DDIT4L PE=1 SV=1	DDIT4L	X	X
	Q9BQI7	PH and SEC7 domain-containing protein 2 OS=Homo sapiens OX=9606 GN=PSD2 PE=2 SV=3	PSD2	X
	O43150	Arf-GAP with SH3 domain, ANK repeat and PH domain-containing protein 2 OS=Homo sapiens OX=9606 GN=ASAP2 PE=1 SV=3	ASAP2	X	X	X	X
	P04279	Semenogelin-1 OS=Homo sapiens OX=9606 GN=SEMG1 PE=1 SV=2	SEMG1	X
	Q86UP0	Cadherin-24 OS=Homo sapiens OX=9606 GN=CDH24 PE=1 SV=1	CDH24		X		X
	A0A075B6I7	Probable non-functional immunoglobulin lambda variable 5-48 OS=Homo sapiens OX=9606 GN=IGLV5-48 PE=5 SV=2	IGLV5-48	X
	P25391	Laminin subunit alpha-1 OS=Homo sapiens OX=9606 GN=LAMA1 PE=1 SV=2	LAMA1			X	X
	O00451	GDNF family receptor alpha-2 OS=Homo sapiens OX=9606 GN=GFRA2 PE=1 SV=2	GFRA2				X
	P05997	Collagen alpha-2(V) chain OS=Homo sapiens OX=9606 GN=COL5A2 PE=1 SV=3	COL5A2				X
	Q15185	Prostaglandin E synthase 3 OS=Homo sapiens OX=9606 GN=PTGES3 PE=1 SV=1	PTGES3			X	X
	Q9Y2W3	Proton-associated sugar transporter A OS=Homo sapiens OX=9606 GN=SLC45A1 PE=1 SV=5	SLC45A1	X
	O94876	Transmembrane and coiled-coil domains protein 1 OS=Homo sapiens OX=9606 GN=TMCC1 PE=1 SV=3	TMCC1			X	X
	P26842	CD27 antigen OS=Homo sapiens OX=9606 GN=CD27 PE=1 SV=2	CD27				X
	Q96JA1	Leucine-rich repeats and immunoglobulin-like domains protein 1 OS=Homo sapiens OX=9606 GN=LRIG1 PE=1 SV=2	LRIG1			X	X
	O14730	Serine/threonine-protein kinase RIO3 OS=Homo sapiens OX=9606 GN=RIOK3 PE=1 SV=2	RIOK3	X
	P55899	IgG receptor FcRn large subunit p51 OS=Homo sapiens OX=9606 GN=FCGRT PE=1 SV=1	FCGRT				X
	A6NFH5	Fatty acid-binding protein 12 OS=Homo sapiens OX=9606 GN=FABP12 PE=2 SV=2	FABP12	X
	P56537	Eukaryotic translation initiation factor 6 OS=Homo sapiens OX=9606 GN=EIF6 PE=1 SV=1	EIF6				X
	Q14432	cGMP-inhibited 3',5'-cyclic phosphodiesterase A OS=Homo sapiens OX=9606 GN=PDE3A PE=1 SV=3	PDE3A			X
	Q14202	Zinc finger MYM-type protein 3 OS=Homo sapiens OX=9606 GN=ZMYM3 PE=1 SV=2	ZMYM3				X
	A6NHZ5	Leucine-rich repeat-containing protein 14B OS=Homo sapiens OX=9606 GN=LRRC14B PE=3 SV=3	LRRC14B		X
	Q9Y4G8	Rap guanine nucleotide exchange factor 2 OS=Homo sapiens OX=9606 GN=RAPGEF2 PE=1 SV=1	RAPGEF2	X		X
	Q01082	Spectrin beta chain, non-erythrocytic 1 OS=Homo sapiens OX=9606 GN=SPTBN1 PE=1 SV=2	SPTBN1				X
	Q04760	Lactoylglutathione lyase OS=Homo sapiens OX=9606 GN=GLO1 PE=1 SV=4	GLO1			X
	O94933	SLIT and NTRK-like protein 3 OS=Homo sapiens OX=9606 GN=SLITRK3 PE=2 SV=2	SLITRK3				X
	Q9HBW1	Leucine-rich repeat-containing protein 4 OS=Homo sapiens OX=9606 GN=LRRC4 PE=1 SV=2	LRRC4				X
	P28070	Proteasome subunit beta type-4 OS=Homo sapiens OX=9606 GN=PSMB4 PE=1 SV=4	PSMB4		X	X	X
	Q969H8	Myeloid-derived growth factor OS=Homo sapiens OX=9606 GN=MYDGF PE=1 SV=1	MYDGF				X
	Q8IVW4	Cyclin-dependent kinase-like 3 OS=Homo sapiens OX=9606 GN=CDKL3 PE=1 SV=1	CDKL3			X
	O95477	Phospholipid-transporting ATPase ABCA1 OS=Homo sapiens OX=9606 GN=ABCA1 PE=1 SV=3	ABCA1	X	X
	Q86XI8	Uncharacterized protein ZSWIM9 OS=Homo sapiens OX=9606 GN=ZSWIM9 PE=1 SV=2	ZSWIM9	X	X
	Q9NW61	Pleckstrin homology domain-containing family J member 1 OS=Homo sapiens OX=9606 GN=PLEKHJ1 PE=1 SV=1	PLEKHJ1			X
	Q496Y0	LON peptidase N-terminal domain and RING finger protein 3 OS=Homo sapiens OX=9606 GN=LONRF3 PE=1 SV=1	LONRF3	X	X
	Q9UJU6	Drebrin-like protein OS=Homo sapiens OX=9606 GN=DBNL PE=1 SV=1	DBNL				X
	O95428	Papilin OS=Homo sapiens OX=9606 GN=PAPLN PE=2 SV=4	PAPLN		X	X	X
	P40225	Thrombopoietin OS=Homo sapiens OX=9606 GN=THPO PE=1 SV=1	THPO		X
	P49406	39S ribosomal protein L19, mitochondrial OS=Homo sapiens OX=9606 GN=MRPL19 PE=1 SV=2	MRPL19	X	X
	P0DPF2	Neuroblastoma breakpoint family member 20 OS=Homo sapiens OX=9606 GN=NBPF20 PE=3 SV=1	NBPF20				X
	Q8IXB1-2	Isoform 2 of DnaJ homolog subfamily C member 10 OS=Homo sapiens OX=9606 GN=DNAJC10	DNAJC10	X	X
	P28482	Mitogen-activated protein kinase 1 OS=Homo sapiens OX=9606 GN=MAPK1 PE=1 SV=3	MAPK1	X	X	X
	O43361	Zinc finger protein 749 OS=Homo sapiens OX=9606 GN=ZNF749 PE=1 SV=2	ZNF749	X	X
	Q9H3U1	Protein unc-45 homolog A OS=Homo sapiens OX=9606 GN=UNC45A PE=1 SV=1	UNC45A	X	X	X
	Q96S53	Dual specificity testis-specific protein kinase 2 OS=Homo sapiens OX=9606 GN=TESK2 PE=1 SV=1	TESK2				X
	P49720	Proteasome subunit beta type-3 OS=Homo sapiens OX=9606 GN=PSMB3 PE=1 SV=2	PSMB3				X
	P25116	Proteinase-activated receptor 1 OS=Homo sapiens OX=9606 GN=F2R PE=1 SV=2	F2R				X
	P22735	Protein-glutamine gamma-glutamyltransferase K OS=Homo sapiens OX=9606 GN=TGM1 PE=1 SV=4	TGM1			X
	P17948	Vascular endothelial growth factor receptor 1 OS=Homo sapiens OX=9606 GN=FLT1 PE=1 SV=2	FLT1	X
	Q9Y251	Heparanase OS=Homo sapiens OX=9606 GN=HPSE PE=1 SV=2	HPSE			X
	Q401N2	Zinc-activated ligand-gated ion channel OS=Homo sapiens OX=9606 GN=ZACN PE=1 SV=2	ZACN				X
	Q9NQW7	Xaa-Pro aminopeptidase 1 OS=Homo sapiens OX=9606 GN=XPNPEP1 PE=1 SV=3	XPNPEP1			X
	Q7RTM1	Proton channel OTOP1 OS=Homo sapiens OX=9606 GN=OTOP1 PE=2 SV=1	OTOP1				X
	Q9H1D0	Transient receptor potential cation channel subfamily V member 6 OS=Homo sapiens OX=9606 GN=TRPV6 PE=1 SV=3	TRPV6			X
	Q9Y3B8	Oligoribonuclease, mitochondrial OS=Homo sapiens OX=9606 GN=REXO2 PE=1 SV=3	REXO2				X
	Q96IU4	Protein ABHD14B OS=Homo sapiens OX=9606 GN=ABHD14B PE=1 SV=1	ABHD14B				X
	Q9H307	Pinin OS=Homo sapiens OX=9606 GN=PNN PE=1 SV=5	PNN			X
	O75923	Dysferlin OS=Homo sapiens OX=9606 GN=DYSF PE=1 SV=1	DYSF			X
	P10163	Basic salivary proline-rich protein 4 OS=Homo sapiens OX=9606 GN=PRB4 PE=1 SV=4	PRB4			X
	Q3SYG4	Protein PTHB1 OS=Homo sapiens OX=9606 GN=BBS9 PE=1 SV=1	BBS9		X	X	X
	Q8IWE2	Protein NOXP20 OS=Homo sapiens OX=9606 GN=FAM114A1 PE=1 SV=2	FAM114A1	X	X	X
	P30085	UMP-CMP kinase OS=Homo sapiens OX=9606 GN=CMPK1 PE=1 SV=3	CMPK1				X
	Q5SQ64	Lymphocyte antigen 6 complex locus protein G6f OS=Homo sapiens OX=9606 GN=LY6G6F PE=1 SV=2	LY6G6F			X	X
	Q9C0H9	SRC kinase signaling inhibitor 1 OS=Homo sapiens OX=9606 GN=SRCIN1 PE=1 SV=4	SRCIN1				X
	Q8N0W4	Neuroligin-4, X-linked OS=Homo sapiens OX=9606 GN=NLGN4X PE=1 SV=1	NLGN4X	X	X	X
	O60331	Phosphatidylinositol 4-phosphate 5-kinase type-1 gamma OS=Homo sapiens OX=9606 GN=PIP5K1C PE=1 SV=2	PIP5K1C		X
	P10768	S-formylglutathione hydrolase OS=Homo sapiens OX=9606 GN=ESD PE=1 SV=2	ESD			X
	Q5T7N2	LINE-1 type transposase domain-containing protein 1 OS=Homo sapiens OX=9606 GN=L1TD1 PE=1 SV=1	L1TD1	X
	Q8TE99	2-phosphoxylose phosphatase 1 OS=Homo sapiens OX=9606 GN=PXYLP1 PE=1 SV=1	PXYLP1	X
	Q9Y4C0	Neurexin-3 OS=Homo sapiens OX=9606 GN=NRXN3 PE=1 SV=4	NRXN3				X
	Q9HCE0	Ectopic P granules protein 5 homolog OS=Homo sapiens OX=9606 GN=EPG5 PE=1 SV=2	EPG5		X
	Q86UP8	General transcription factor II-I repeat domain-containing protein 2A OS=Homo sapiens OX=9606 GN=GTF2IRD2 PE=1 SV=3	GTF2IRD2	X
	Q9H2X9	Solute carrier family 12 member 5 OS=Homo sapiens OX=9606 GN=SLC12A5 PE=1 SV=3	SLC12A5	X	X	X	X
	P13501	C-C motif chemokine 5 OS=Homo sapiens OX=9606 GN=CCL5 PE=1 SV=3	CCL5	X		X
	Q99459	Cell division cycle 5-like protein OS=Homo sapiens OX=9606 GN=CDC5L PE=1 SV=2	CDC5L	X	X
	P09603	Macrophage colony-stimulating factor 1 OS=Homo sapiens OX=9606 GN=CSF1 PE=1 SV=2	CSF1				X
	Q6PKH6	Dehydrogenase/reductase SDR family member 4-like 2 OS=Homo sapiens OX=9606 GN=DHRS4L2 PE=2 SV=1	DHRS4L2		X
	P0DJD7	Pepsin A-4 OS=Homo sapiens OX=9606 GN=PGA4 PE=1 SV=1	PGA4				X
	Q96NA2	Rab-interacting lysosomal protein OS=Homo sapiens OX=9606 GN=RILP PE=1 SV=1	RILP			X
	Q8N8Z6	Discoidin, CUB and LCCL domain-containing protein 1 OS=Homo sapiens OX=9606 GN=DCBLD1 PE=1 SV=2	DCBLD1				X
	Q13586	Stromal interaction molecule 1 OS=Homo sapiens OX=9606 GN=STIM1 PE=1 SV=3	STIM1		X
	P15586	N-acetylglucosamine-6-sulfatase OS=Homo sapiens OX=9606 GN=GNS PE=1 SV=3	GNS				X
	Q96F07	Cytoplasmic FMR1-interacting protein 2 OS=Homo sapiens OX=9606 GN=CYFIP2 PE=1 SV=2	CYFIP2	X	X	X
	A8MVW5	HEPACAM family member 2 OS=Homo sapiens OX=9606 GN=HEPACAM2 PE=1 SV=1	HEPACAM2				X
	Q92854	Semaphorin-4D OS=Homo sapiens OX=9606 GN=SEMA4D PE=1 SV=1	SEMA4D				X
	Q9H7T0	Cation channel sperm-associated protein subunit beta OS=Homo sapiens OX=9606 GN=CATSPERB PE=2 SV=2	CATSPERB		X	X
	Q9Y2I7	1-phosphatidylinositol 3-phosphate 5-kinase OS=Homo sapiens OX=9606 GN=PIKFYVE PE=1 SV=3	PIKFYVE	X
	Q9NYH9	U3 small nucleolar RNA-associated protein 6 homolog OS=Homo sapiens OX=9606 GN=UTP6 PE=2 SV=2	UTP6	X
	P23497	Nuclear autoantigen Sp-100 OS=Homo sapiens OX=9606 GN=SP100 PE=1 SV=3	SP100	X
	Q13510	Acid ceramidase OS=Homo sapiens OX=9606 GN=ASAH1 PE=1 SV=5	ASAH1				X
	Q8NFY4	Semaphorin-6D OS=Homo sapiens OX=9606 GN=SEMA6D PE=1 SV=1	SEMA6D				X
	O94905	Erlin-2 OS=Homo sapiens OX=9606 GN=ERLIN2 PE=1 SV=1	ERLIN2			X
	P49758	Regulator of G-protein signaling 6 OS=Homo sapiens OX=9606 GN=RGS6 PE=1 SV=5	RGS6			X
	Q9NS62	Thrombospondin type-1 domain-containing protein 1 OS=Homo sapiens OX=9606 GN=THSD1 PE=2 SV=1	THSD1				X
	P23588	Eukaryotic translation initiation factor 4B OS=Homo sapiens OX=9606 GN=EIF4B PE=1 SV=2	EIF4B				X
	Q3B820	Protein FAM161A OS=Homo sapiens OX=9606 GN=FAM161A PE=1 SV=2	FAM161A			X
	O43291	Kunitz-type protease inhibitor 2 OS=Homo sapiens OX=9606 GN=SPINT2 PE=1 SV=2	SPINT2				X
	Q13939	Calicin OS=Homo sapiens OX=9606 GN=CCIN PE=2 SV=3	CCIN	X
	P63279	SUMO-conjugating enzyme UBC9 OS=Homo sapiens OX=9606 GN=UBE2I PE=1 SV=1	UBE2I				X
	Q68DL7	Uncharacterized protein C18orf63 OS=Homo sapiens OX=9606 GN=C18orf63 PE=2 SV=2	C18orf63	X	X
	Q16832	Discoidin domain-containing receptor 2 OS=Homo sapiens OX=9606 GN=DDR2 PE=1 SV=2	DDR2				X
	Q9BYK8	Helicase with zinc finger domain 2 OS=Homo sapiens OX=9606 GN=HELZ2 PE=1 SV=6	HELZ2	X
	Q9UNU6	7-alpha-hydroxycholest-4-en-3-one 12-alpha-hydroxylase OS=Homo sapiens OX=9606 GN=CYP8B1 PE=1 SV=2	CYP8B1		X
	Q9NUQ2	1-acyl-sn-glycerol-3-phosphate acyltransferase epsilon OS=Homo sapiens OX=9606 GN=AGPAT5 PE=1 SV=3	AGPAT5				X
	Q16539	Mitogen-activated protein kinase 14 OS=Homo sapiens OX=9606 GN=MAPK14 PE=1 SV=3	MAPK14				X
	P61970	Nuclear transport factor 2 OS=Homo sapiens OX=9606 GN=NUTF2 PE=1 SV=1	NUTF2			X
	Q9P2Y5	UV radiation resistance-associated gene protein OS=Homo sapiens OX=9606 GN=UVRAG PE=1 SV=1	UVRAG			X	X
	Q96EH3	Mitochondrial assembly of ribosomal large subunit protein 1 OS=Homo sapiens OX=9606 GN=MALSU1 PE=1 SV=1	MALSU1				X
	Q8TCZ2	CD99 antigen-like protein 2 OS=Homo sapiens OX=9606 GN=CD99L2 PE=1 SV=1	CD99L2			X	X
	Q5MJ70	Speedy protein A OS=Homo sapiens OX=9606 GN=SPDYA PE=1 SV=2	SPDYA			X
	Q8IZ81	ELMO domain-containing protein 2 OS=Homo sapiens OX=9606 GN=ELMOD2 PE=1 SV=1	ELMOD2			X
	P17275	Transcription factor jun-B OS=Homo sapiens OX=9606 GN=JUNB PE=1 SV=1	JUNB	X
	Q99996-1	Isoform 1 of A-kinase anchor protein 9 OS=Homo sapiens OX=9606 GN=AKAP9	AKAP9	X
	Q14667	Protein KIAA0100 OS=Homo sapiens OX=9606 GN=KIAA0100 PE=1 SV=3	KIAA0100	X
	P28906	Hematopoietic progenitor cell antigen CD34 OS=Homo sapiens OX=9606 GN=CD34 PE=1 SV=2	CD34		X		X
	O14793	Growth/differentiation factor 8 OS=Homo sapiens OX=9606 GN=MSTN PE=1 SV=1	MSTN				X
	Q17RQ9	NTPase KAP family P-loop domain-containing protein 1 OS=Homo sapiens OX=9606 GN=NKPD1 PE=2 SV=1	NKPD1			X
	Q86YW5	Trem-like transcript 1 protein OS=Homo sapiens OX=9606 GN=TREML1 PE=1 SV=2	TREML1	X	X	X
	P19438-5	Isoform 5 of Tumor necrosis factor receptor superfamily member 1A OS=Homo sapiens OX=9606 GN=TNFRSF1A	TNFRSF1A	X	X

## Sheet: Table S2
	Table S2: Cluster B proteins depleted by Supermix strategy.
	Accession	Gene	Description
	P00747	PLG	Plasminogen OS=Homo sapiens OX=9606 GN=PLG PE=1 SV=2
	P0C0L5	C4B	Complement C4-B OS=Homo sapiens OX=9606 GN=C4B PE=1 SV=2
	P0C0L4	C4A	Complement C4-A OS=Homo sapiens OX=9606 GN=C4A PE=1 SV=2
	P04217-2	A1BG	Isoform 2 of Alpha-1B-glycoprotein OS=Homo sapiens OX=9606 GN=A1BG
	P04196	HRG	Histidine-rich glycoprotein OS=Homo sapiens OX=9606 GN=HRG PE=1 SV=1
	P02749	APOH	Beta-2-glycoprotein 1 OS=Homo sapiens OX=9606 GN=APOH PE=1 SV=3
	P13671	C6	Complement component C6 OS=Homo sapiens OX=9606 GN=C6 PE=1 SV=3
	P02790	HPX	Hemopexin OS=Homo sapiens OX=9606 GN=HPX PE=1 SV=2
	P36980	CFHR2	Complement factor H-related protein 2 OS=Homo sapiens OX=9606 GN=CFHR2 PE=1 SV=1
	P10643	C7	Complement component C7 OS=Homo sapiens OX=9606 GN=C7 PE=1 SV=2
	P07358	C8B	Complement component C8 beta chain OS=Homo sapiens OX=9606 GN=C8B PE=1 SV=3
	P07357	C8A	Complement component C8 alpha chain OS=Homo sapiens OX=9606 GN=C8A PE=1 SV=2
	P02751-1	FN1	Isoform 1 of Fibronectin OS=Homo sapiens OX=9606 GN=FN1
	P08519	LPA	Apolipoprotein(a) OS=Homo sapiens OX=9606 GN=LPA PE=1 SV=1
	P08603	CFH	Complement factor H OS=Homo sapiens OX=9606 GN=CFH PE=1 SV=4
	P04004	VTN	Vitronectin OS=Homo sapiens OX=9606 GN=VTN PE=1 SV=1
	P00751	CFB	Complement factor B OS=Homo sapiens OX=9606 GN=CFB PE=1 SV=2
	P04217	A1BG	Alpha-1B-glycoprotein OS=Homo sapiens OX=9606 GN=A1BG PE=1 SV=4
	P02747	C1QC	Complement C1q subcomponent subunit C OS=Homo sapiens OX=9606 GN=C1QC PE=1 SV=3
	P02746	C1QB	Complement C1q subcomponent subunit B OS=Homo sapiens OX=9606 GN=C1QB PE=1 SV=3
	P01031	C5	Complement C5 OS=Homo sapiens OX=9606 GN=C5 PE=1 SV=4
	P07360	C8G	Complement component C8 gamma chain OS=Homo sapiens OX=9606 GN=C8G PE=1 SV=3
	P19823	ITIH2	Inter-alpha-trypsin inhibitor heavy chain H2 OS=Homo sapiens OX=9606 GN=ITIH2 PE=1 SV=2
	P01008	SERPINC1	Antithrombin-III OS=Homo sapiens OX=9606 GN=SERPINC1 PE=1 SV=1
	P19827	ITIH1	Inter-alpha-trypsin inhibitor heavy chain H1 OS=Homo sapiens OX=9606 GN=ITIH1 PE=1 SV=3
	Q03591	CFHR1	Complement factor H-related protein 1 OS=Homo sapiens OX=9606 GN=CFHR1 PE=1 SV=2

## Sheet: Table S3
	Table S3: Summary of functional annotation analysis results for the undepleted plasma and the three immune depletion approaches. This analysis was performed using the DAVID functional annotation tool, considering the results with p-value and FDR <0.05.
	UP_Keywords	Undepleted	Top7	Top14	Supermix
	Secreted	275	306	306	419
	Signal	362	411	431	695
	Disulfide bond	288	340	364	596
	Glycoprotein	271	349	415	679
	Immunoglobulin V region	35	25
	Immunity	84	84	64	98
	Hemostasis	30	31	33	33
	Blood coagulation	30	31	33	33
	Complement pathway	24	25	26	28
	Pyrrolidone carboxylic acid	35	33	25	31
	Immunoglobulin domain	72	76	68	138
	Adaptive immunity	40	33		24
	Disease mutation	146	171	215	270
	Innate immunity	39	42	46	57
	Acute phase	14	13	11	12
	EGF-like domain	34	40	42	76
	Complement alternate pathway	11	11	12	12
	HDL	12	11	9	9
	Hydroxylation	22	23	24	35
	Calcium	64	87	107	160
	Immunoglobulin C region	11	11		8
	Gamma-carboxyglutamic acid	11	12	12	11
	Serine protease	24	28	26	32
	Protease inhibitor	22	31	35	50
	Sulfation	15	18	19	23
	Amyloidosis	12	12	11	11
	Glycation	9	10	10	10
	Cell adhesion	41	65	85	132
	Amyloid	11	10	11	10
	Serine protease inhibitor	17	24	27	40
	Heparin-binding	17	25	27	34
	Membrane attack complex	7	7	7	7
	Lipid transport	17	17	16	17
	Fibrinolysis	7	7	7	7
	Collagen	15	14	15	28
	Oxidation	9	8	11	9
	Inflammatory response	18	16	19	25
	Cytolysis	7	7	7	7
	Protease	36	59	74	98
	Extracellular matrix	22	33	39	65
	Chylomicron	5	5	5	5
	Thioester bond	5	6	5	6
	Complement activation lectin pathway	4	3	3	3
	Cell membrane	116	135	146	257
	Cholesterol metabolism	9	9	9	12
	Serine protease homolog	5	5	4	4
	VLDL	5	5	5	5
	Intermediate filament	10	9	23	16
	Chemotaxis	11	11	11	12
	Polymorphism	354	441	557	812
	Proteoglycan	8	10	12	20
	Sterol metabolism	9	9	9	12
	Antioxidant	5	7	7	8
	Growth factor binding	5	7	6	9
	Glycolysis	6	12	12	11
	Redox-active center	7	9	10	14
	Steroid metabolism	9	9	9	12
	Hydrolase	64	97	132	189
	Actin-binding	17	32	40	46
	Oxygen transport	4
	Lipoprotein	36	42	54	79
	S-nitrosylation	6	7	11	12
	Acetylation		149	224	251
	Angiogenesis		16	18	28
	Threonine protease		6	9	14
	GPI-anchor		13	22	43
	Isomerase		12	15	23
	Oxidoreductase		32	37
	Lectin		14	19	36
	Pentose shunt		3	3	3
	Cytoskeleton		53	71
	Lysosome		18	37	54
	Glycosidase		9	12	21
	Nitration		7	9	9
	Cell projection		36	49	56
	Peroxidase		5	6	6
	Phosphoprotein			392	526
	Keratin			23	16
	Cell junction			54	63
	Proteasome			11	17
	Cytoplasm			225
	Metalloprotease			18	26
	Aminopeptidase			8	10
	Carboxypeptidase			7	12
	Chaperone			18
	Basement membrane			7	11
	Stress response			11	13
	Laminin EGF-like domain			6	10
	Tyrosine-protein kinase			11	25
	Receptor				145
	Transmembrane				358
	Transmembrane helix				356
	Membrane				456
	Signal-anchor				45
	MHC I				6
	Blood group antigen				8
	Thiol protease inhibitor				7
	Actin capping				6
	Notch signaling pathway				9
	IgG-binding protein				4
	Heparan sulfate				5
	LDL				4
	Carbohydrate metabolism				12
	Digestion				4
	Tissue remodeling				3

## Sheet: Table S4
	Table S4: Kegg pathway analysis results for the undepleted plasma and the three immune depletion approaches. This analysis was performed using the DAVID functional annotation tool, considering the results with p-value and FDR <0.05.
	KEGG pathway	Undepleted	Top7	Top14	Supermix
	Complement and coagulation cascades	52	54	55	58
	ECM-receptor interaction	17	16	21	38
	Phagosome	22	25	28	39
	Platelet activation	20	19		23
	Focal adhesion	25	29	34	50
	Hematopoietic cell lineage	12	13		24
	Regulation of actin cytoskeleton	19	21	26
	Glycolysis / Gluconeogenesis	10	16	19	20
	Cell adhesion molecules (CAMs)	13	20	25	49
	Pentose phosphate pathway		9	11	13
	Carbon metabolism		17	23	24
	Biosynthesis of amino acids		12	14	16
	Fc gamma R-mediated phagocytosis		11
	Lysosome			21	33
	Amoebiasis			18	31
	Adherens junction			14	17
	Glutathione metabolism			10	12
	Proteasome			9	14
	PI3K-Akt signaling pathway			34	61
	Antigen processing and presentation			12	17
	Protein processing in endoplasmic reticulum			20
	Protein digestion and absorption				22
	Proteoglycans in cancer				32
	Axon guidance				23
	Starch and sucrose metabolism				10
	Other glycan degradation				7

## Sheet: Table S5
	Table S5: Peptide identification in the pool of plasma samples from MM patients.
	Annotated Sequence	Modifications	Master Protein Accessions	Identification
	[R].AAAATGTIFTFR.[S]		P05154	MS2
	[K].MSENIPNEVYALGAFDGLHTVEGR.[Y]		O95497	WiMT
	[-].MSFIPVAEDSDFPIHNLPYGVFSTR.[G]	1xMet-loss+Acetyl [N-Term]	P16930	WiMT
	[R].MSGECAPNVSVSVSTSHTTISGGGSR.[G]	1xCarbamidomethyl [C5]	P04264	MS2
	[R].MSGECAPNVSVSVSTSHTTISGGGSR.[G]	1xCarbamidomethyl [C5]; 1xOxidation [M1]	P04264	MS2
	[K].MSSINADFAFNLYR.[R]		P05543	MS2
	[K].MSSINADFAFNLYR.[R]	1xOxidation [M1]	P05543	WiMT
	[R].MSVEADINGLR.[R]		P02533	WiMT
	[-].MSDKPDMAEIEKFDK.[S]	1xMet-loss+Acetyl [N-Term]	P62328	WiMT
	[-].MSDKPDMAEIEK.[F]	1xOxidation [M7]; 1xMet-loss+Acetyl [N-Term]	P62328	WiMT
	[-].MSDKPDMAEIEK.[F]	1xMet-loss+Acetyl [N-Term]	P62328	MS2
	[K].MQILEGLGLNLQK.[S]		P05154	MS2
	[K].MQILEGLGLNLQK.[S]	1xOxidation [M1]	P05154	WiMT
	[R].MQNDTAENETTEK.[E]		Q05682-4	WiMT
	[K].MQQVENGLSEK.[T]		P05154	WiMT
	[K].MREIEEVLTPEMLMR.[W]		P29622	MS2
	[K].MREIEEVLTPEMLMR.[W]	1xOxidation [M]	P29622	WiMT
	[K].MREWFSETFQK.[V]		P02654	MS2
	[K].MTGLVDEAIDTK.[S]		P18206	WiMT
	[K].MREWFSETFQK.[V]	1xOxidation [M1]	P02654	MS2
	[K].MRPSTDTITVMVENSHGLR.[V]	1xOxidation [M]	P0C0L4; P0C0L5	MS2
	[K].MRPSTDTITVMVENSHGLR.[V]	2xOxidation [M1; M11]	P0C0L4; P0C0L5	WiMT
	[K].MSAEINEIIR.[V]		P18206	WiMT
	[K].MSAEINEIIR.[V]	1xOxidation [M1]	P18206	WiMT
	[R].MSAQTHGLLGQFFQPFDFK.[V]		Q06033	WiMT
	[K].MSAVEGICTSESPVIDHQGTK.[S]	1xCarbamidomethyl [C8]	P01031	MS2
	[K].MSAVEGICTSESPVIDHQGTK.[S]	1xCarbamidomethyl [C8]; 1xOxidation [M1]	P01031	MS2
	[K].MRPSTDTITVMVENSHGLR.[V]		P0C0L4; P0C0L5	MS2
	[K].MTGLVDEAIDTK.[S]	1xOxidation [M1]	P18206	WiMT
	[R].MTQSPSSFSASTGDR.[V]		A0A0C4DH67	MS2
	[R].MVSDINNAWGCLEQVEK.[G]	1xCarbamidomethyl [C11]; 1xOxidation [M1]	P12814	WiMT
	[K].MVSGFIPLKPTVK.[M]		P01023; P20742	MS2
	[K].MVSGFIPLKPTVK.[M]	1xOxidation [M1]	P01023; P20742	MS2
	[K].MVVESAYEVIK.[L]		P07195	WiMT
	[R].MYDAQQQQVGTNK.[C]		Q07954	WiMT
	[K].MYEQEWVR.[L]		P12259	MS2
	[K].MYEVVYQIGTETR.[S]		Q9UHG3	WiMT
	[K].MYFDAVQAIETHLIR.[K]		P33908	WiMT
	[K].MYFDAVQAIETHLIR.[K]	1xOxidation [M1]	P33908	WiMT
	[K].MYLGYEYVTAIR.[N]		P02787	MS2
	[K].MYLGYEYVTAIR.[N]	1xOxidation [M1]	P02787	MS2
	[K].MYLGYEYVTAIRNLR.[E]		P02787	MS2
	[R].MYQMDIQQELQR.[Y]		P04114	MS2
	[R].MYQMDIQQELQR.[Y]	1xOxidation [M]	P04114	MS2
	[R].MVSDINNAWGCLEQVEK.[G]	1xCarbamidomethyl [C11]	P12814	WiMT
	[R].MVQEQCCHSQLEELHCATGISLANEQDR.[C]	3xCarbamidomethyl [C6; C7; C16]	P23142-4; P23142	MS2
	[-].MVNPTVFFDIAVDGEPLGR.[V]	1xMet-loss+Acetyl [N-Term]	P62937	WiMT
	[K].MTSNFPVDLSDYPK.[S]		P04114	MS2
	[K].MTSNFPVDLSDYPK.[S]	1xOxidation [M1]	P04114	MS2
	[R].MTVSTLVLGEGATEAEISMTSTR.[W]		P02760	WiMT
	[R].MTVSTLVLGEGATEAEISMTSTR.[W]	1xOxidation [M]	P02760	WiMT
	[R].MTVSTLVLGEGATEAEISMTSTR.[W]	2xOxidation [M1; M19]	P02760	WiMT
	[K].MTVTDQVNCPK.[L]	1xCarbamidomethyl [C9]	P05090	MS2
	[K].MTVTDQVNCPK.[L]	1xCarbamidomethyl [C9]; 1xOxidation [M1]	P05090	MS2
	[R].MVAAATNNLCEAANAAVQGHASQEK.[L]	1xCarbamidomethyl [C10]	Q9Y490	WiMT
	[R].MVETTAYALLTSLNLK.[D]		P01031	MS2
	[R].MVETTAYALLTSLNLK.[D]	1xOxidation [M1]	P01031	WiMT
	[K].MVGGIAQIIAAQEEMLR.[K]		Q9Y490	WiMT
	[K].MVLLEQLFLDHNALR.[G]		P40197	WiMT
	[-].MVNPTVFFDIAVDGEPLGR.[V]	1xMet-loss [N-Term]	P62937	WiMT
	[K].MVCGPSGSQLVLLK.[L]	1xCarbamidomethyl [C3]	P26927	MS2
	[R].MYQMDIQQELQR.[Y]	2xOxidation [M1; M4]	P04114	WiMT
	[K].MLDAEDIVGTARPDEK.[A]	1xOxidation [M1]	P12814	WiMT
	[K].MLEEIMKYEASILTHDSSIR.[Y]		P02679-2; P02679	MS2
	[K].MLEVPYVDR.[N]		P00742	MS2
	[K].MLEVPYVDR.[N]	1xOxidation [M1]	P00742	MS2
	[K].MLGQMTDQVADLR.[A]		P18206	WiMT
	[K].MLGQMTDQVADLR.[A]	1xOxidation [M]	P18206	WiMT
	[R].MLHACTSEGSAHR.[K]	1xCarbamidomethyl [C5]	Q04756	MS2
	[R].MLHACTSEGSAHR.[K]	1xCarbamidomethyl [C5]; 1xOxidation [M1]	Q04756	WiMT
	[R].MLHACTSEGSAHRK.[W]	1xCarbamidomethyl [C5]	Q04756	WiMT
	[K].MILEIAPTSDNDFGR.[Y]		O15394	WiMT
	[R].MIISGTTAHFSSK.[D]		Q6P179	WiMT
	[K].MINLSVPDTIDER.[TA]		P13796; P13797	WiMT
	[K].MINLSVPDTIDER.[TA]	1xOxidation [M1]	P13796; P13797	WiMT
	[K].MLDAEDIVGTARPDEK.[A]		P12814	WiMT
	[R].MLADAPPQDPSCCSGALYYGSK.[V]	2xCarbamidomethyl [C12; C13]; 1xOxidation [M1]	P19823	MS2
	[R].MLADAPPQDPSCCSGALYYGSK.[V]	2xCarbamidomethyl [C12; C13]	P19823	MS2
	[K].MKPVPDLVPGNFK.[S]	1xOxidation [M1]	P02671	MS2
	[R].MGPTELLIEMEDWKGDKVK.[A]		P02675	MS2
	[K].MGPTVSPICLPGTSSDYNLMDGDLGLISGWGR.[T]	1xCarbamidomethyl [C9]	P09871	MS2
	[K].MGPTVSPICLPGTSSDYNLMDGDLGLISGWGR.[T]	1xCarbamidomethyl [C9]; 1xOxidation [M]	P09871	WiMT
	[K].MGPTVSPICLPGTSSDYNLMDGDLGLISGWGR.[T]	1xCarbamidomethyl [C9]; 2xOxidation [M1; M20]	P09871	WiMT
	[K].MGVEWTSCAEVVSQEK.[T]	1xCarbamidomethyl [C8]	P06681	WiMT
	[K].MGVEWTSCAEVVSQEK.[T]	1xCarbamidomethyl [C8]; 1xOxidation [M1]	P06681	WiMT
	[K].MLQITNTGFEMK.[L]		P20742	MS2
	[K].MHLYGLHEGQR.[V]		P22105-1	WiMT
	[K].MHSMNGFMYGNQPGLTMCK.[G]	1xCarbamidomethyl [C18]	P00450	MS2
	[K].MHSMNGFMYGNQPGLTMCK.[G]	1xCarbamidomethyl [C18]; 1xOxidation [M]	P00450	MS2
	[K].MHVLHCQGR.[N]	1xCarbamidomethyl [C6]	P10643	MS2
	[K].MHVLHCQGR.[N]	1xCarbamidomethyl [C6]; 1xOxidation [M1]	P10643	MS2
	[K].MKPVPDLVPGNFK.[S]		P02671	MS2
	[K].MHLYGLHEGQR.[V]	1xOxidation [M1]	P22105-1	WiMT
	[R].MQEAMTQEVSDVFSDTTTPIK.[L]		P18206	WiMT
	[K].MLQITNTGFEMK.[L]	1xOxidation [M]	P20742	WiMT
	[R].MPCAEDYLSVVLNQLCVLHEKTPVSDRVTK.[C]	2xCarbamidomethyl [C3; C16]	P02768	MS2
	[E].MPFDPQDTHQSR.[F]		P01011	MS2
	[K].MPFINIPVLDIK.[K]		O95980	WiMT
	[R].MPMGLSTGIISDSQIK.[A]		P12259	MS2
	[K].MPPYDEQTQAFIDAAQEAR.[N]		P14314	WiMT
	[-].MPPYTVVYFPVR.[G]	1xMet-loss [N-Term]	P09211	WiMT
	[R].MPVAPYWTSPEK.[M]		P11362	WiMT
	[K].MPYECGPSLDVCAQDER.[S]	2xCarbamidomethyl [C5; C12]	P10643	MS2
	[K].MPYECGPSLDVCAQDER.[S]	2xCarbamidomethyl [C5; C12]; 1xOxidation [M1]	P10643	WiMT
	[R].MPCAEDYLSVVLNQLCVLHEKTPVSDR.[V]	2xCarbamidomethyl [C3; C16]	P02768	MS2
	[R].MPCAEDYLSVVLNQLCVLHEK.[T]	2xCarbamidomethyl [C3; C16]; 1xOxidation [M1]	P02768	MS2
	[R].MPCAEDYLSVVLNQLCVLHEK.[T]	2xCarbamidomethyl [C3; C16]	P02768	MS2
	[R].MNVAPACLPERDWAESTLMTQK.[T]	1xCarbamidomethyl [C7]	P00742	MS2
	[R].MLSSFLSEDVFK.[Q]		P15144	WiMT
	[K].MLTPEHVFIHPGWK.[L]		P09871	MS2
	[K].MLTPEHVFIHPGWK.[L]	1xOxidation [M1]	P09871	MS2
	[R].MMAVAADTLQR.[L]		Q96KN2	MS2
	[R].MMAVAADTLQR.[L]	1xOxidation [M]	Q96KN2	WiMT
	[K].MLQNVQMPSK.[K]		P27487	WiMT
	[R].MMAVAADTLQR.[L]	2xOxidation [M1; M2]	Q96KN2	WiMT
	[K].MNLYGFHGGQR.[MV]		P22105-1	WiMT
	[R].MNNGDVDLTSDR.[Y]		Q12860	WiMT
	[R].MNSGECLGNVVSDER.[R]	1xCarbamidomethyl [C6]	Q9UK23	WiMT
	[K].MNTVIAALSR.[D]		P08185	MS2
	[K].MNTVIAALSR.[D]	1xOxidation [M1]	P08185	MS2
	[R].MNVAPACLPER.[D]	1xCarbamidomethyl [C7]	P00742	WiMT
	[R].MNVAPACLPER.[D]	1xCarbamidomethyl [C7]; 1xOxidation [M1]	P00742	WiMT
	[R].MNFRPGVLSSR.[Q]	1xOxidation [M1]	Q14624-2; Q14624	MS2
	[R].MYSVNGYTFGSLPGLSMCAEDR.[V]	1xCarbamidomethyl [C18]	P00450	MS2
	[R].MYSVNGYTFGSLPGLSMCAEDR.[V]	1xCarbamidomethyl [C18]; 1xOxidation [M]	P00450	WiMT
	[R].MYSVNGYTFGSLPGLSMCAEDR.[V]	1xCarbamidomethyl [C18]; 2xOxidation [M1; M17]	P00450	WiMT
	[R].NLDLDSIIAEVK.[A]		Q5XKE5; P35908; P04259; P02538; O95678; P13647	MS2
	[RC].NLDIERPTYTNLNR.[L]		P68363; Q9H853; P68366	MS2
	[R].NIDNPALADIYTEHAHQVVVAK.[Y]		O75083	WiMT
	[K].NLDSNAVVIMVNYIFFK.[A]		P05154	WiMT
	[R].NIDVFNVEDQK.[R]		Q8NBJ4	WiMT
	[R].NLELGLTQGSFAFIHK.[D]		Q9UK55	WiMT
	[R].NIETIINTFHQYSVK.[L]		P06702	WiMT
	[K].NIFFSPLSISAAYAMLSLGACSHSR.[S]	1xCarbamidomethyl [C21]	P29622	WiMT
	[R].NIFWTDSNLDR.[I]		P14543	WiMT
	[K].NLDGISHAPNAVK.[T]		Q92820	MS2
	[K].NLDENYCRNPDGK.[R]	1xCarbamidomethyl [C7]	P00747	WiMT
	[K].NLDENYCR.[N]	1xCarbamidomethyl [C7]	P00747	MS2
	[K].NLCEAMENFMQQLK.[E]	1xCarbamidomethyl [C3]	P20851	MS2
	[K].NGQWNDVPCSTSHLAVCEFPI.[-]	2xCarbamidomethyl [C9; C17]	P11226	WiMT
	[K].NGVAQEPVHLDSPAIK.[H]		P04217	MS2
	[R].NGYPIPQVIWYK.[N]		P43121	WiMT
	[R].NHGVDDDGDDDGDDGGTDGPR.[H]		Q14515	WiMT
	[K].NHLQLEGLFFTNGEHTSK.[A]		P04114	MS2
	[R].NHMQYEIVIK.[V]		P19827-2; P19827	MS2
	[R].NHMQYEIVIK.[V]	1xOxidation [M3]	P19827-2; P19827	WiMT
	[R].NHNALLASLTTQK.[K]		O75882	MS2
	[R].NKPGVYTDVAYYLAWIR.[E]		P00748	WiMT
	[R].NKPGVYTDVAYYLAWIREHTVS.[-]		P00748	WiMT
	[RK].NKYEDEINKR.[T]		P04264; P04259; P02538; P13647	WiMT
	[K].NIAAFGGNPK.[S]		P06276	MS2
	[K].NLASRPYTFHSHGITYYK.[E]		P00450	MS2
	[R].NLAVSQVVHK.[A]		P01011	MS2
	[R].NHPVATLMATGHPMVISSDDPAMFGAK.[G]		Q9NZK5	WiMT
	[R].NLHDLDVSDNQLER.[V]		Q6EMK4	WiMT
	[R].NLQPASEYTVSLVAIK.[G]		P02751-10; P02751-1	MS2
	[K].NIQSLEVIGK.[G]		P02775	MS2
	[R].NLREGTCPEAPTDECKPVK.[W]	2xCarbamidomethyl [C7; C15]	P02787	MS2
	[K].NLTDFAEQYSIQDWAK.[R]		P04114	MS2
	[K].NLVINCEVFDPQEHENINGVPPHLGHPFHWGGHER.[S]	1xCarbamidomethyl [C6]	P04196	MS2
	[K].NMATRPYSIHAHGVQTESSTVTPTLPGETLTYVWK.[I]		P00450	MS2
	[K].NMATRPYSIHAHGVQTESSTVTPTLPGETLTYVWK.[I]	1xOxidation [M2]	P00450	MS2
	[R].NMEQFQVSVSVAPNAK.[I]		Q14624-2; Q14624	MS2
	[R].NMEQFQVSVSVAPNAK.[I]	1xOxidation [M2]	Q14624-2; Q14624	MS2
	[K].NMEVSVATTTK.[A]		P04114	MS2
	[K].NMEVSVATTTK.[A]	1xOxidation [M2]	P04114	MS2
	[R].NLQNNAEWVYQGAIR.[Q]		P04114	MS2
	[R].NIQEYLSILTDPDGK.[G]		P04114	WiMT
	[R].NLQEILHGAVR.[F]		P00533	WiMT
	[K].NIPTVNENLENYYLEVNQLEK.[F]		P51884	MS2
	[R].NLIAAVAPGAFLGLK.[A]		P35858	MS2
	[R].NLIAVLGEHDLSEHDGDEQSR.[R]		P08709	WiMT
	[R].NLIAVLGEHDLSEHDGDEQSRR.[V]		P08709	WiMT
	[K].NILDRQDPPSVVVTSHQAPGEK.[K]		P25311	MS2
	[R].NLIDVSLLSPEHLQYLNR.[Y]		O43895	WiMT
	[K].NIIFVETSFTTLETR.[A]		P22792	WiMT
	[K].NLGPIQLFYTR.[R]		P10912	WiMT
	[K].NILFVIDVSGSMWGVK.[M]	1xOxidation [M12]	P19823	WiMT
	[K].NLLHVTDTGVGMTR.[E]		P14625	WiMT
	[K].NILTSNNIDVK.[K]		P05090	MS2
	[R].NLMYVDIPIVDHQK.[C]	1xOxidation [M3]	O00187	WiMT
	[R].NLPATDPLQR.[E]		Q16610	MS2
	[K].NIPGDFECECPEGYR.[Y]	2xCarbamidomethyl [C8; C10]	P07225	MS2
	[K].NIPGDFECECPEGYRYNLK.[S]	2xCarbamidomethyl [C8; C10]	P07225	MS2
	[R].NIIHGSDSVESAEK.[E]		P15531	WiMT
	[K].NGNMAGISDQR.[I]	1xOxidation [M4]	P05546	WiMT
	[K].NGNMAGISDQR.[I]		P05546	MS2
	[R].NALWHTGDTESQVR.[L]		P49747	WiMT
	[R].NALWHTGNTPGQVR.[T]		P07996; P35442	MS2
	[K].NAIWIDCGIHAR.[E]	1xCarbamidomethyl [C7]	Q96IY4	MS2
	[R].NANFKFTDHLK.[Y]		P00738	MS2
	[K].NAVPPVIHSPNDHVVYEK.[E]		Q9NPH3	WiMT
	[R].NCCNTENPPGCYR.[Y]	3xCarbamidomethyl [C2; C3; C11]	P43652	WiMT
	[K].NCEDMDECSIR.[N]	2xCarbamidomethyl [C2; C8]	P35555	WiMT
	[K].NCELDVTCNIK.[N]	2xCarbamidomethyl [C2; C8]	P00740	MS2
	[K].NCGQMSEIEAK.[V]	1xCarbamidomethyl [C2]	Q9Y490	WiMT
	[K].NCNDFQYESK.[V]	1xCarbamidomethyl [C2]	Q04917	WiMT
	[R].NDASHLLVFTTDAK.[T]		P05106	MS2
	[R].NALTGLPPGLFQASATLDTLVLK.[E]		P02750	MS2
	[K].NALQNIILYHLTPGVFIGK.[G]		Q15063-5	WiMT
	[K].NAIHTFVQSGSHLAAR.[E]		P04040	WiMT
	[R].NALFCLESAWNVAK.[E]	1xCarbamidomethyl [C5]	P20742	WiMT
	[R].MYSVNGYTFGSLPGLSMCAEDRVK.[W]	1xCarbamidomethyl [C18]	P00450	MS2
	[K].MYYSAVDPTK.[D]		P00450	MS2
	[K].MYYSAVDPTK.[D]	1xOxidation [M1]	P00450	MS2
	[K].MYYSAVDPTKDIFTGLIGPMK.[I]		P00450	WiMT
	[R].NAAENGAIQNLIK.[E]		P11226	MS2
	[K].NDEAEYICIAENK.[A]	1xCarbamidomethyl [C8]	P13591	WiMT
	[K].NADLQVLKPEPELVYEDLR.[G]		P01833	MS2
	[R].NADYSYSVWK.[G]		P01031	MS2
	[R].NAEENLIYDYHLIDK.[L]		P20061	WiMT
	[K].NAGTCHVVDR.[R]	1xCarbamidomethyl [C5]	P46531	WiMT
	[K].NALALFVLPK.[E]		P05543	MS2
	[R].NALFCLESAWK.[T]	1xCarbamidomethyl [C5]	P01023	MS2
	[R].NDLISATKTQVADAK.[R]		P19823	WiMT
	[R].NDLSPTTVMSEGAR.[N]		P30043	WiMT
	[A].NFMLTQPHSVSESPGK.[T]		P01721	MS2
	[A].NFMLTQPHSVSESPGK.[T]	1xOxidation [M3]	P01721	MS2
	[R].NFPDLNTYIYYNEK.[Y]		P15169	MS2
	[R].NFPPSQDASGDLYTTSSQLTLPATQCLAGK.[S]	1xCarbamidomethyl [C26]	P01876	MS2
	[R].NFPPSQDASGDLYTTSSQLTLPATQCPDGK.[S]	1xCarbamidomethyl [C26]	P01877	MS2
	[K].NFPSPVDAAFR.[Q]		P02790	MS2
	[K].NFPSPVDAAFRQGHNSVFLIK.[G]		P02790	MS2
	[K].NFINNPLAQADWAAK.[K]		P35579	MS2
	[K].NFPSPVDAAFRQGHNSVFLIKGDK.[V]		P02790	MS2
	[R].NFSDNQLQEGK.[N]		P37802	MS2
	[K].NFTEVHPDYGSHIQALLDK.[Y]		P04040	WiMT
	[K].NFVASHIANILNSEELDIQDLK.[K]		P04114	MS2
	[K].NFVASHIANILNSEELDIQDLKK.[L]		P04114	MS2
	[K].NGIDIYSLTVDSR.[V]		Q14624-2; Q14624	MS2
	[R].NGLYADNDNDSTFTGFLLYHDTN.[-]		Q15848	WiMT
	[K].NFRTEHYEEQIEAFK.[S]		P02748	MS2
	[R].MGPTELLIEMEDWKGDK.[V]	1xOxidation [M]	P02675	WiMT
	[R].NFGYTLR.[S]		P05546	MS2
	[R].NEVWWTIDGK.[K]		Q9NPH3	WiMT
	[K].NDNDNIFLSPLSISTAFAMTK.[L]		P01008	MS2
	[K].NDNDNIFLSPLSISTAFAMTK.[L]	1xOxidation [M19]	P01008	MS2
	[K].NEDSLVFVQTDK.[S]		P01023	MS2
	[R].NFGDLVSIQSESEK.[K]		P22897	WiMT
	[K].NEEALDTESSER.[L]		Q92859	WiMT
	[R].NELESYAYSLK.[N]		P11021	WiMT
	[R].NELIPLIYLENPR.[R]		P20742	MS2
	[R].NEVTYDPYLVLIPDVAAYCPAYVVK.[S]	1xCarbamidomethyl [C19]	Q9Y6R7	WiMT
	[K].NEEDVAELSISPSDNAVVLTNLLPGTEYVVSVSSVYEQHESTPLR.[G]		P02751-10; P02751-1	WiMT
	[R].MGPTELLIEMEDWKGDK.[V]		P02675	MS2
	[R].MGPTELLIEMEDWK.[G]	2xOxidation [M1; M10]	P02675	MS2
	[R].MGPTELLIEMEDWK.[G]	1xOxidation [M]	P02675	MS2
	[R].LVLLNAIYLSAK.[W]		P05155	MS2
	[R].IVLVDNK.[C]		P01591	MS2
	[K].LVMGIPTFGR.[S]		P36222	WiMT
	[K].LVNEVTEFAK.[T]		P02768	MS2
	[K].LVNEVTEFAKTCVADESAENCDK.[S]	2xCarbamidomethyl [C12; C21]	P02768	MS2
	[K].LVNGQSHISLSK.[A]		P0C0L4; P0C0L5	MS2
	[K].LVNIYDSMPLR.[Y]		Q9UBQ6	WiMT
	[K].LVNMLDAVQENQHK.[M]		O95810	MS2
	[K].LVPFATELHER.[L]		P06727	MS2
	[K].LVILEGELERAEER.[A]		P67936-2; P67936	MS2
	[K].LVIIEGDLER.[T]		P06753-2; P06753	WiMT
	[K].IVLLDVPVR.[A]		P08514	MS2
	[K].IVLGQEQDSYGGKFDR.[S]		P02743	WiMT
	[R].LVGGDNLCSGR.[L]	1xCarbamidomethyl [C8]	O43866	MS2
	[R].LVGGPMDASVEEEGVR.[R]		P01034	WiMT
	[R].LVGGPMDASVEEEGVR.[R]	1xOxidation [M6]	P01034	WiMT
	[R].LVGGPMDASVEEEGVRR.[A]		P01034	MS2
	[R].LVGGPMDASVEEEGVRR.[A]	1xOxidation [M6]	P01034	WiMT
	[R].LVGITSWGEGCAR.[R]	1xCarbamidomethyl [C11]	P03952	MS2
	[R].LVPNPAQEDSNSDGVGDICESDFDQDQVIDR.[I]	1xCarbamidomethyl [C19]	P35443	WiMT
	[K].IVGPSGAAVPCK.[V]	1xCarbamidomethyl [C11]	P21333	WiMT
	[R].LVHVEEPHTETVR.[K]		P01023	MS2
	[R].LVHVEEPHTETVRK.[Y]		P01023	MS2
	[K].IVLDVNK.[T]		Q6VAB6	MS2
	[R].IVIEYVDR.[I]		P05156	MS2
	[K].IVLGQEQDSYGGK.[F]		P02743	MS2
	[R].LVHCPIETQVLR.[E]	1xCarbamidomethyl [C4]	Q99969	MS2
	[R].LVPNPGQEDADRDGVGDVCQDDFDADK.[V]	1xCarbamidomethyl [C19]	P49747	MS2
	[K].LVPPMEEDYPQFGSPK.[-]	1xOxidation [M5]	P08697	WiMT
	[K].LVSIGAEEIVDGNVK.[M]		P12814	WiMT
	[K].LVSLSAQNLVDCSTEK.[Y]	1xCarbamidomethyl [C12]	P25774	WiMT
	[R].LVSNHSLHETSSVFVDSLTK.[A]		P21333	MS2
	[K].IVSSAMEPDR.[E]		P08603	MS2
	[K].IVSSAMEPDREYHFGQAVR.[F]		P08603	MS2
	[K].IVSSAMEPDREYHFGQAVR.[F]	1xOxidation [M6]	P08603	MS2
	[K].LVTDLTKVHTECCHGDLLECADDR.[A]	3xCarbamidomethyl [C12; C13; C20]	P02768	MS2
	[K].LVTDLTKVHTECCHGDLLECADDRADLAK.[Y]	3xCarbamidomethyl [C12; C13; C20]	P02768	MS2
	[R].IVTNYFSAHDNDANLQMDIFLEEDGNVNSK.[L]		P00488	WiMT
	[R].IVVEDVDEPPVFSK.[L]		P55285	WiMT
	[R].IVSLEPAYPPVFYLNK.[D]		Q14126	WiMT
	[R].LVSEDPINDGEWHR.[V]		P98160	WiMT
	[K].LVSANRLFGDK.[S]		P01008	MS2
	[K].LVQAAQMLQSDPYSVPAR.[D]		P18206	WiMT
	[K].LVQAAQMLQSDPYSVPAR.[D]	1xOxidation [M7]	P18206	WiMT
	[R].LVQAFQFTDK.[H]		Q06830	WiMT
	[R].LVQAFQYTDK.[H]		Q13162	WiMT
	[R].IVQFSPSGK.[F]		P19021	WiMT
	[K].IVQILPWEQNEQVK.[N]		P04114	MS2
	[R].IVQLIQDTR.[I]		P15169	MS2
	[K].LVPPMEEDYPQFGSPK.[-]		P08697	MS2
	[K].IVQTYHVNMAGTNPYTTITPQEINGK.[W]		P12814	WiMT
	[R].LVRPEVDVMCTAFHDNEETFLK.[K]	1xCarbamidomethyl [C10]	P02768	MS2
	[R].LVRPEVDVMCTAFHDNEETFLK.[K]	1xCarbamidomethyl [C10]; 1xOxidation [M9]	P02768	MS2
	[R].LVRPEVDVMCTAFHDNEETFLKK.[Y]	1xCarbamidomethyl [C10]	P02768	MS2
	[R].LVRPEVDVMCTAFHDNEETFLKK.[Y]	1xCarbamidomethyl [C10]; 1xOxidation [M9]	P02768	MS2
	[R].IVQSHQQTGR.[S]		Q9BXJ4-3	WiMT
	[K].LVGFIDDAVK.[K]		P04114	MS2
	[R].LTQLNLDR.[C]		P07359	MS2
	[R].LTQLYEQAR.[W]		Q86UX7	WiMT
	[K].ITQVLHFTKDVK.[A]		P0C0L4; P0C0L5	WiMT
	[R].LTSLPLGALR.[G]		P07359	MS2
	[K].ITTGGDVINNGLWNMVSVEELEHSISIK.[I]		P07225	MS2
	[R].ITTTSPWMFPSR.[M]		P04180	MS2
	[R].LTVAAPPSGGPGFLSIERPDSRPPR.[V]		P0C0L4; P0C0L5	MS2
	[R].ITQDAQLK.[S]		P08185	MS2
	[K].LTQAQIFDYGEIPNFPR.[S]		P00491	WiMT
	[R].ITPTITNFALR.[L]		Q86U17	WiMT
	[R].LTLLAPLNSVFK.[D]		Q15582	MS2
	[K].ITLIINWLQEALSSASLAHMK.[A]		P04114	MS2
	[K].ITLLSALVETR.[T]		P01011	MS2
	[K].ITLPVDFVTADK.[F]		P00558	MS2
	[R].LTLQGIISWGSGCGDR.[N]	1xCarbamidomethyl [C13]	P00748	WiMT
	[R].ITISEDGNLR.[I]		Q8IWV2	WiMT
	[K].LTLTPWVGLR.[K]		O75882	MS2
	[R].LTLVCESAPGPITMDLTGDLEALK.[K]	1xCarbamidomethyl [C5]	P52566	WiMT
	[K].ITPNLAEFAFSLYR.[Q]		P01009	MS2
	[R].ITPSYVAFTPEGER.[L]		P11021	MS2
	[K].LTISEQNIQR.[A]		P04114	MS2
	[R].LTVLPPELGNLDLTGQK.[Q]		Q15404	WiMT
	[Q].LTVLSQPK.[A]		P15814	MS2
	[R].LTVSIEAR.[A]		P22792	MS2
	[R].LVDGVTECSGR.[L]	1xCarbamidomethyl [C8]	Q86VB7	WiMT
	[R].LVDNYCEAWR.[T]	1xCarbamidomethyl [C6]	P39059	WiMT
	[R].IVEGSDAEIGMSPWQVMLFR.[K]		P00734	MS2
	[R].IVEGSDAEIGMSPWQVMLFR.[K]	1xOxidation [M]	P00734	MS2
	[R].LVEPVTDFLLDMPYHIR.[S]		P09619	WiMT
	[R].LVEVLEGVCSK.[S]	1xCarbamidomethyl [C9]	Q96HD1	WiMT
	[K].LVFQQFDLEPSEGCFYDYVK.[I]	1xCarbamidomethyl [C14]	P00736	MS2
	[K].LVVLGSGGVGK.[S]		P61224	MS2
	[R].LVDFYVMPVVNVDGYDYSWK.[K]		Q96IY4	MS2
	[R].LVDEDMNSFK.[A]		Q06033	MS2
	[R].LTVSSLQESGLK.[V]		P21333	WiMT
	[K].ITVVAGEHNIEETEHTEQK.[R]		P00740	MS2
	[K].ITVVDALHEIPVK.[K]		Q16270	WiMT
	[R].LTYAYFAGGDAGDAFDGFDFGDDPSDK.[F]		P02679-2; P02679	MS2
	[R].ITYGETGGNSPVQEFTVPGSK.[S]		P02751-10; P02751-1	MS2
	[K].LTYNHGGITGSR.[G]		Q9Y6R7	WiMT
	[R].LVDEDMNSFK.[A]	1xOxidation [M6]	Q06033	WiMT
	[K].LTYTAEVSVPK.[E]		P09960	WiMT
	[R].LVAYYTLIGASGQR.[E]		P01024	MS2
	[K].LVCSGLLQASK.[S]	1xCarbamidomethyl [C3]	Q9UHG3	MS2
	[R].IVDDWANDGWGLK.[K]		P27824	WiMT
	[R].LTYTNWNEGEPNNAGSDEDCVLLLK.[N]	1xCarbamidomethyl [C20]	P11226	MS2
	[K].NMQDMVEDYR.[N]		P04264	MS2
	[K].LVVQSSIDSSAFK.[H]		P10721	WiMT
	[R].LVYLVENPGGYVAYSK.[A]		P02786	WiMT
	[K].MDCHGGISGTIYEYGALTIDGEEYIPFK.[Q]	1xCarbamidomethyl [C3]	P22352	WiMT
	[K].MDCQECPEGYR.[V]	2xCarbamidomethyl [C3; C6]	P21333	WiMT
	[-].MDDDIAALVVDNGSGMCK.[A]	1xCarbamidomethyl [C17]; 1xMet-loss+Acetyl [N-Term]	P60709	MS2
	[-].MDDREDLVYQAK.[L]	1xAcetyl [N-Term]	P62258	WiMT
	[R].MDGQTDFWR.[D]		P22105-1	WiMT
	[-].MDHYDSQQTNDYMQPEEDWDRDLLLDPAWEK.[Q]	1xAcetyl [N-Term]	P12814	WiMT
	[K].MDSTANEVEAVK.[V]		P07237	WiMT
	[R].MDVFSQNMFCAGHPSLK.[Q]	1xCarbamidomethyl [C10]	P00736	MS2
	[K].MDATANDVPSPYEVR.[G]		P30101	WiMT
	[R].MCVDVNECQR.[Y]	2xCarbamidomethyl [C2; C8]; 1xOxidation [M1]	P23142-4; P23142	MS2
	[R].MCVDVNECQR.[Y]	2xCarbamidomethyl [C2; C8]	P23142-4; P23142	MS2
	[R].MAPYQGPDAVPGALDYK.[S]		O43707	WiMT
	[K].MASGAANVVGPK.[I]		Q92520	WiMT
	[-].MASGVAVSDGVIK.[V]	1xMet-loss+Acetyl [N-Term]	P23528	MS2
	[-].MASPDWGYDDK.[N]	1xMet-loss+Acetyl [N-Term]	P00915	MS2
	[R].MATNAAAQNAIK.[K]		Q9Y490	WiMT
	[R].MDVFSQNMFCAGHPSLK.[Q]	1xCarbamidomethyl [C10]; 1xOxidation [M]	P00736	MS2
	[-].MATNWGSLLQDK.[Q]	1xMet-loss+Acetyl [N-Term]	P48637	WiMT
	[K].MCPQLQQYEMHGPEGLR.[V]	1xCarbamidomethyl [C2]	P01023	MS2
	[K].MCPQLQQYEMHGPEGLR.[V]	1xCarbamidomethyl [C2]; 1xOxidation [M]	P01023	MS2
	[K].MCPQLQQYEMHGPEGLR.[V]	1xCarbamidomethyl [C2]; 2xOxidation [M1; M10]	P01023	MS2
	[K].MCPQLQQYEMHGPEGLRVGFYESDVMGR.[G]	1xCarbamidomethyl [C2]; 1xOxidation [M]	P01023	WiMT
	[R].MATTMIQSK.[V]	1xOxidation [M]	P19823	MS2
	[R].MDWLVPATCEPIQSVFFFSGDK.[Y]	1xCarbamidomethyl [C9]	P04004	MS2
	[R].MEDSGIYVCEGVNLIGK.[N]	1xCarbamidomethyl [C9]	P19320	WiMT
	[R].MFTTAPDQVDK.[E]		P00450	MS2
	[R].MFTTAPDQVDK.[E]	1xOxidation [M1]	P00450	MS2
	[R].MFTTAPDQVDKEDEDFQESNK.[M]		P00450	MS2
	[R].MFTTAPDQVDKEDEDFQESNK.[M]	1xOxidation [M1]	P00450	MS2
	[K].MGAPESGLAEYLFDK.[H]		P02794	WiMT
	[K].MGDHLALEDYLTTDLVETWLR.[N]		Q9UK55	WiMT
	[K].MGDHLALEDYLTTDLVETWLR.[N]	1xOxidation [M1]	Q9UK55	WiMT
	[K].MGIQHAYSENADFSGLTEDNGLK.[L]		P05543	MS2
	[K].MGIQHAYSENADFSGLTEDNGLK.[L]	1xOxidation [M1]	P05543	WiMT
	[K].MGNFPWQVFTNIHGR.[G]		P00736	MS2
	[K].MGNFPWQVFTNIHGR.[G]	1xOxidation [M1]	P00736	MS2
	[R].MGPTELLIEMEDWK.[G]		P02675	MS2
	[R].MFLSFPTTK.[T]	1xOxidation [M1]	P69905	MS2
	[R].MFLSFPTTK.[T]		P69905	MS2
	[K].MEDSGVYLCEGINQAGR.[S]	1xCarbamidomethyl [C9]	P19320	WiMT
	[K].MEDSGVYLCEGINQAGR.[S]	1xCarbamidomethyl [C9]; 1xOxidation [M1]	P19320	WiMT
	[-].MEEEIAALVIDNGSGMCK.[A]	1xCarbamidomethyl [C17]; 1xMet-loss+Acetyl [N-Term]	P63261	WiMT
	[K].MEEVEAMLLPETLK.[R]		P01011	MS2
	[K].MEEVEAMLLPETLK.[R]	1xOxidation [M]	P01011	MS2
	[K].MEEVEAMLLPETLK.[R]	2xOxidation [M1; M7]	P01011	WiMT
	[K].MEEVEAMLLPETLKR.[W]		P01011	WiMT
	[R].MDWLVPATCEPIQSVFFFSGDK.[Y]	1xCarbamidomethyl [C9]; 1xOxidation [M1]	P04004	MS2
	[R].MELERPGGNEITR.[G]		P02671	MS2
	[R].MELERPGGNEITR.[G]	1xOxidation [M1]	P02671	MS2
	[R].MELERPGGNEITRGGSTSYGTGSETESPR.[N]		P02671	MS2
	[K].MEIQEIQLK.[E]	1xOxidation [M1]	P09493-5; P09493-8	WiMT
	[K].MELQEMQLK.[E]		P07951-2	WiMT
	[K].MENAELDVPIQSVFTR.[D]		P07996	WiMT
	[K].MEGDSVLLEVDGEEVLR.[L]	1xOxidation [M1]	P04278	WiMT
	[-].MAPPSVFAEVPQAQPVLVFK.[L]	1xMet-loss [N-Term]	P17174	WiMT
	[-].MAHQTGIHATEELK.[E]	1xMet-loss+Acetyl [N-Term]	Q6IBS0	WiMT
	[K].LYGSAGPPPTGEEDTAEK.[D]		P11021	WiMT
	[R].LYGSEAFATDFQDSAAAK.[K]		P01011	MS2
	[R].LYGSEAFATDFQDSAAAKK.[L]		P01011	WiMT
	[K].LYHAFSAMK.[K]		P05155	MS2
	[K].LYHSEAFTVNFGDTEEAK.[K]		P01009	MS2
	[K].LYHSEAFTVNFGDTEEAKK.[Q]		P01009	MS2
	[R].IYHSHIDAPK.[D]		P00450	MS2
	[K].LYIEYGIQR.[I]		Q9NPH3	MS2
	[K].IYLSDSLTGK.[F]		Q7Z7G0	WiMT
	[R].LYISGGFGGVALGR.[L]		Q7Z7M0	WiMT
	[R].IYISGMAPRPSLAK.[K]		P04004	MS2
	[R].IYISGMAPRPSLAK.[K]	1xOxidation [M6]	P04004	WiMT
	[R].IYGPSDSASR.[D]		Q6UX71	WiMT
	[R].IYGNQDTSSQLK.[K]		P19823	MS2
	[R].IYEDHDATQQLQGFYSQVAK.[P]		P19827-2; P19827	MS2
	[K].LVYREYTDASFTNRK.[E]		P00450	MS2
	[R].LWAYLTIEQLLEK.[R]		Q06033	WiMT
	[K].LWAYLTINQLLAER.[S]		P19823	MS2
	[R].LWAYLTIQELLAK.[R]		P19827-2; P19827	MS2
	[R].LWAYLTIQQLLEQTVSASDADQQALR.[N]		Q14624-2; Q14624	MS2
	[R].IWCSDPSPGIVAFPR.[L]	1xCarbamidomethyl [C3]	Q16620	WiMT
	[K].LYLVQGTQVYVFLTK.[G]		P02790	MS2
	[K].IWHHTFYNELR.[V]		P60709; P68133; P63261	MS2
	[PR].IWLDNVR.[C]		O43866	MS2
	[R].LWLEGNPWDCGCPLK.[A]	2xCarbamidomethyl [C10; C12]	P35858	MS2
	[R].LYDFNSYWR.[V]		P22304	WiMT
	[K].LYDYCDVPQCAAPSFDCGKPQVEPK.[K]	3xCarbamidomethyl [C5; C10; C17]	P00747	MS2
	[R].IWGPLQEDADIQVYR.[R]		Q76LX8	WiMT
	[K].IYLYTLNDNAR.[S]		P02751-10; P02751-1	MS2
	[K].IYMADLESALHYILR.[I]		O00391	WiMT
	[-].MAAATGPSFWLGNETLK.[V]	1xMet-loss+Acetyl [N-Term]	P12955	WiMT
	[K].MADEAGSEADHEGTHSTK.[R]		P02671	MS2
	[K].MADEAGSEADHEGTHSTK.[R]	1xOxidation [M1]	P02671	MS2
	[-].MADSRDPASDQMQHWK.[E]	1xMet-loss+Acetyl [N-Term]	P04040	WiMT
	[-].MAAAAAAGEAR.[R]	1xMet-loss+Acetyl [N-Term]	P09417	WiMT
	[-].MAEQEPTAEQLAQIAAENEEDEHSVNYKPPAQK.[S]	1xMet-loss+Acetyl [N-Term]	P52565	WiMT
	[K].MAESGYDIALLK.[L]	1xOxidation [M1]	P03951	WiMT
	[-].MAGELTPEEEAQYK.[K]	1xMet-loss+Acetyl [N-Term]	Q9NZT1	WiMT
	[-].MAGLNSLEAVK.[R]	1xMet-loss+Acetyl [N-Term]	P67936	MS2
	[R].MAGTAFDFENMK.[R]		P31150	WiMT
	[-].MAGWNAYIDNLMADGTCQDAAIVGYK.[D]	1xCarbamidomethyl [C17]; 1xMet-loss+Acetyl [N-Term]	P07737	MS2
	[K].MAESGYDIALLK.[L]		P03951	MS2
	[R].LVYHLGLPFSFLTFPYVEEAIK.[I]		P49908	MS2
	[R].LYWVDAFYDR.[I]		Q07954	WiMT
	[K].IYMTCPDCPSSIPTDSSNHQVLEAATESLAK.[Y]	2xCarbamidomethyl [C5; C8]	Q9UGM5	WiMT
	[K].IYMTCPDCPSSIPTDSSNHQVLEAATESLAK.[Y]	2xCarbamidomethyl [C5; C8]; 1xOxidation [M3]	Q9UGM5	WiMT
	[K].LYPIANGNNQSPVDIK.[T]		P00915	WiMT
	[K].IYPTVNCQPLGMISLMK.[R]	1xCarbamidomethyl [C7]	P01042-2; P01042	MS2
	[K].IYPTVNCQPLGMISLMK.[R]	1xCarbamidomethyl [C7]; 1xOxidation [M]	P01042-2; P01042	MS2
	[K].IYPTVNCQPLGMISLMK.[R]	1xCarbamidomethyl [C7]; 2xOxidation [M12; M16]	P01042-2; P01042	WiMT
	[R].IYVVDVGSEPR.[A]		Q13228	WiMT
	[R].IYSLWEHSTK.[N]		P04114	MS2
	[R].LYSVSYLLK.[D]		P21333	MS2
	[R].IYTSPTWSAFVTDSSWSAR.[K]		Q08380	MS2
	[K].LYTVEYLSNMVGGR.[K]		Q13867	WiMT
	[R].IYSGILNLSDITK.[D]		P03952	MS2
	[K].NMQDMVEDYR.[N]	1xOxidation [M]	P04264	MS2
	[K].NMQDMVEDYR.[N]	2xOxidation [M2; M5]	P04264	WiMT
	[K].QLNEINYEDHK.[L]		P00751	MS2
	[K].QLPGGQNPVSYVYLEVVSK.[H]		P01031	MS2
	[R].QIQVFEDEPAR.[I]		Q9NPH3	WiMT
	[R].QLRPEHFQEVGYAAPPSPPLSR.[S]		Q16610	WiMT
	[K].QLSFEEFIMLMAR.[L]		P06702	WiMT
	[K].QISNLQQSISDAEQR.[G]		P04264	MS2
	[K].QISNLQQSISDAEQRGENALK.[D]		P04264	MS2
	[R].QLTSGPNQEQVSPLTLLK.[L]		P08697	MS2
	[R].QITVNDLPVGR.[S]		Q06830; P32119	MS2
	[R].QLVESDINGLR.[R]		Q15323; Q92764	WiMT
	[R].QLLLTADDR.[V]		P04075	WiMT
	[R].QLGLPGPPDVPDHAAYHPFRR.[L]		Q14624-2; Q14624	WiMT
	[R].QLGLPGPPDVPDHAAYHPFR.[R]		Q14624-2; Q14624	MS2
	[K].QKWEAEPVYVQR.[A]		P25311	MS2
	[K].QLAGLVANYYTPR.[W]		P54802	WiMT
	[R].QIDDIDVRFQK.[A]		P04114	WiMT
	[R].QLVESDINSLR.[R]		Q14525	WiMT
	[R].QIFHPEQLITGK.[E]		Q9H853	WiMT
	[K].QLGAGSIEECAAK.[C]	1xCarbamidomethyl [C10]	P00747	MS2
	[K].QLGCPTAVTAIGR.[V]	1xCarbamidomethyl [C4]	Q86VB7	WiMT
	[K].QIGGDGMMDITDTYK.[F]		P00488	MS2
	[K].QIGGDGMMDITDTYK.[F]	2xOxidation [M7; M8]	P00488	WiMT
	[K].QLEQVIAK.[D]		P02671	MS2
	[K].QKPDGVFQEDAPVIHQEMIGGLR.[N]	1xOxidation [M18]	P01024	MS2
	[R].QLVFHIGHGDLGSPAVLVSR.[N]		O95479	WiMT
	[K].QLVHHFEIDVDIFEPQGISK.[L]		P19827-2; P19827	MS2
	[K].QPFVQGLALYTPVVLPR.[S]		P01019	MS2
	[R].QPNCDDPETEEAALVAIDYINQNLPWGYK.[H]	1xCarbamidomethyl [C4]	P02765	MS2
	[R].QPSSAFAAFVK.[R]		P01024	MS2
	[R].QPVPGQQMTLK.[I]		P01024	MS2
	[R].QPVPGQQMTLK.[I]	1xOxidation [M8]	P01024	MS2
	[R].QPYSYDFPEDVAPALGTSFSHMLGATNPTQK.[T]		P06681	WiMT
	[K].QQDHFFQAAFLEER.[D]		P08567	WiMT
	[R].QQELTHQEHR.[V]		P18206	WiMT
	[K].QQNAQGGFSSTQDTVVALHALSK.[Y]		P01023	MS2
	[K].QQNAQGGFSSTQDTVVALHALSKYGAATFTRTGK.[A]		P01023	WiMT
	[K].QQNAQGGFSSTQDTVVALHALSR.[Y]		P20742	MS2
	[R].QPAVEEPAEVTATVLASR.[D]		P32942	WiMT
	[R].QNVDHSQEAAK.[A]		O00391	WiMT
	[R].QNQEYQVLLDVR.[A]		Q14532; Q15323; Q14525; Q92764	WiMT
	[R].QLYGDTGVLGR.[F]		P07360	MS2
	[K].QLYNVEATSYALLALLQLK.[D]		P01024	MS2
	[K].QMEQISQFLQAAER.[Y]		P37802	WiMT
	[K].QNCELFEQLGEYK.[F]	1xCarbamidomethyl [C3]	P02768	MS2
	[K].QNCELFEQLGEYKFQNALLVRYTK.[K]	1xCarbamidomethyl [C3]	P02768	MS2
	[K].QNDFNSVEEK.[K]		P10643	MS2
	[R].QNGAALTSASILAQQVWGTLVLLQR.[L]		Q96PD5	WiMT
	[R].QNLEPLFEQYINNLR.[R]		P04259; P02538; P13647	WiMT
	[K].QNLFMGENQFNVPK.[E]		O95497	WiMT
	[K].QNLFMGENQFNVPK.[E]	1xOxidation [M5]	O95497	WiMT
	[K].QNCELFEQLGEYKFQNALLVR.[Y]	1xCarbamidomethyl [C3]	P02768	MS2
	[K].QKPDGVFQEDAPVIHQEMIGGLR.[N]		P01024	MS2
	[R].QHVVYGPWNLPQSSYSHLTR.[Q]		Q16610-3; Q16610	MS2
	[K].QHVVSVEEALLATGQWK.[S]		P07996	WiMT
	[K].QELSEAEQATR.[T]		P01024	MS2
	[K].QEPERNECFLQHK.[D]	1xCarbamidomethyl [C8]	P02768	MS2
	[K].QEPERNECFLQHKDDNPNLPR.[L]	1xCarbamidomethyl [C8]	P02768	MS2
	[K].QEPGENSEILPTLK.[Y]		P22352	MS2
	[R].QEPSQGTTTFAVTSILR.[V]		P01876	MS2
	[R].QEPSQGTTTFAVTSILRVAAEDWKK.[G]		P01876	MS2
	[K].QETLDGHMVVR.[S]		P13591	WiMT
	[K].QEVCEEFSQQLNSNGCITQQVHTK.[M]	2xCarbamidomethyl [C4; C16]	P20742	WiMT
	[K].QEYDESGPSIVHR.[K]		P60709; P63261	MS2
	[K].QEYDESGPSIVHRK.[C]		P60709; P63261	WiMT
	[R].QEYEQLIAK.[N]		P35527	WiMT
	[K].QFGAQANVIGPWIQTK.[M]		P12814	WiMT
	[K].QEINSHVEMQTK.[G]	1xOxidation [M9]	P05543	WiMT
	[K].QEINSHVEMQTK.[G]		P05543	MS2
	[R].QEIECQNQEYSLLLSIK.[M]	1xCarbamidomethyl [C5]	P35527	WiMT
	[R].QELAVFCSPEPPAK.[T]	1xCarbamidomethyl [C7]	Q9Y490	WiMT
	[K].QDSLSSQNQLGVLPLSWDIPELVNMGQWK.[I]		P01024	MS2
	[K].QDSLSSQNQLGVLPLSWDIPELVNMGQWK.[I]	1xOxidation [M25]	P01024	MS2
	[R].QEALELMNQNLDIYEQQVMTAAQK.[D]		P43251	MS2
	[R].QEALELMNQNLDIYEQQVMTAAQK.[D]	1xOxidation [M19]	P43251	WiMT
	[R].QEATTVSCFR.[G]	1xCarbamidomethyl [C8]	P26927	MS2
	[R].QFGPYCGHGFPGPLNIETK.[S]	1xCarbamidomethyl [C6]	P09871	MS2
	[R].QECSIPVCGQDQVTVAMTPR.[S]	2xCarbamidomethyl [C3; C8]	P00734	MS2
	[K].QEDACQGDSGGPHVTR.[F]	1xCarbamidomethyl [C5]	P00742	MS2
	[K].QEDDLANINQWVK.[E]		P08697	MS2
	[R].QEDVIATANLSR.[KR]		Q9Y490	WiMT
	[R].QEEQTTCTTEGWSPEPR.[C]	1xCarbamidomethyl [C7]	P05160	MS2
	[R].QEGLMIASSLLNEGYLQPAGDMSK.[S]		P08567	WiMT
	[R].QECSIPVCGQDQVTVAMTPR.[S]	2xCarbamidomethyl [C3; C8]; 1xOxidation [M17]	P00734	WiMT
	[K].QFSFPLSSEPFQGSYK.[V]		P01023	MS2
	[K].QFTSSTSYNR.[G]		P02671	MS2
	[R].QGSFQGGFR.[S]		P0C0L4; P0C0L5	MS2
	[R].QGVDADINGLR.[Q]		P35527	MS2
	[K].QGYDLSPLTPLSELSVQCNR.[G]	1xCarbamidomethyl [C18]	P05160	WiMT
	[R].QGYFVEAQPK.[I]		P02743	MS2
	[K].QGYQLIEGNQVLHSFTAVCQDDGTWHR.[A]	1xCarbamidomethyl [C19]	P00736	MS2
	[K].QHIEAIDVR.[V]		P04114	MS2
	[R].QHIEMSTTGWVGR.[F]		P27487	WiMT
	[V].QHIQLLQK.[N]		P02671	MS2
	[K].QHQLGVWPLLPGSFK.[T]		P12259	WiMT
	[K].QHSDPCALNPR.[M]	1xCarbamidomethyl [C6]	P04275	WiMT
	[R].QHVHPEETGGSDR.[Y]		P34096	WiMT
	[K].QHDMGHMMR.[C]		P02751-10; P02751-1	MS2
	[R].QQQHLFGSNVTDCSGNFCLFR.[S]	2xCarbamidomethyl [C13; C18]	P02787	MS2
	[R].QGPVNLLSDPEQGVEVTGQYER.[E]		Q14624-2; Q14624	MS2
	[K].QFTSSTSYNRGDSTFESK.[S]		P02671	MS2
	[R].QFVTATDVVR.[G]		P13796	WiMT
	[KR].QFVTPADVVSGNPK.[L]		P13797	WiMT
	[R].QFVYLESDYSK.[L]		Q12884	WiMT
	[R].QGETLNFLEIGYSR.[C]		Q16610-3; Q16610	MS2
	[K].QGFFPDSVNK.[A]		P04114	WiMT
	[R].QGPVNLLSDPEQGVEVTGQYEREK.[A]		Q14624-2; Q14624	MS2
	[K].QGFGNVATNTDGK.[N]		P02675	MS2
	[R].QGHNSVFLIK.[G]		P02790	MS2
	[R].QGHVEQCECFGGR.[T]	2xCarbamidomethyl [C7; C9]	Q04756	WiMT
	[R].QGLLPVLESFK.[V]		P02647	MS2
	[R].QGIPFFAQVLLVDGK.[G]		P20742	MS2
	[R].QGIPFFGQVR.[L]		P01023	MS2
	[R].QGNMTAALQAALK.[N]		O15511	WiMT
	[K].QGFGNVATNTDGKNYCGLPGEYWLGNDK.[I]	1xCarbamidomethyl [C16]	P02675	MS2
	[R].QDRDLEEPINFR.[L]		Q9NPH3	WiMT
	[R].QQTEWQSGQR.[W]		P02649	MS2
	[R].QQTHMLDVMQDHFSR.[A]	1xOxidation [M]	P10909-6	MS2
	[K].RDLEIEVVLFHPNYNINGK.[K]		P00751	WiMT
	[K].RDLEIEVVLFHPNYNINGKK.[E]		P00751	WiMT
	[R].RDPPQYPVVPVHLDR.[I]		P10153	WiMT
	[K].RDPSPVSGPVHLFR.[L]		Q9UJJ9	WiMT
	[K].RDPTAEQFQEELEK.[F]		P31944	WiMT
	[R].RDQALTEEHAR.[Q]		P12814	MS2
	[R].RDTANLFPQTSLTLHMWPDTEGTFNVECLTTDHYTGGMK.[Q]	1xCarbamidomethyl [C28]	P00450	MS2
	[K].RDTMVEDLVVLVR.[G]		P07358	MS2
	[K].RDTMVEDLVVLVR.[G]	1xOxidation [M4]	P07358	WiMT
	[R].REDFDVEAADSAGNCLDSLVFVAGDR.[Q]	1xCarbamidomethyl [C15]	P09871	MS2
	[K].REEAPSLRPAPPPISGGGYR.[A]		P02675	MS2
	[K].RDHALLEEQSK.[Q]		O43707	WiMT
	[R].RDGYLFQLLR.[I]		P04196	MS2
	[R].RDFTFDLYR.[A]		P05154	WiMT
	[K].RDETLQDGCDTHFCK.[V]	2xCarbamidomethyl [C9; C14]	P04275	WiMT
	[K].RAPSTWLTAYVVK.[V]		P01024	MS2
	[K].RAPWCHTTNSQVR.[W]	1xCarbamidomethyl [C5]	P00747	MS2
	[R].RAPYPNYDR.[D]		Q16610	WiMT
	[R].RAPYPNYDRDILTIDIGR.[V]		Q16610	MS2
	[K].RAQLGDLPWQVAIK.[D]		P05156	MS2
	[K].RATTVTGTPCQDWAAQEPHR.[H]	1xCarbamidomethyl [C10]	P00747	MS2
	[K].RCCQDGVTR.[L]	2xCarbamidomethyl [C2; C3]	P0C0L4; P0C0L5	MS2
	[K].RCTDAVGDRR.[Q]	1xCarbamidomethyl [C2]	P02748	MS2
	[R].RCTDDVRPQDCYHGAGEQYR.[G]	2xCarbamidomethyl [C2; C11]	Q2TV78; P26927	MS2
	[R].RDDDGALHAACQVQPSATLDAAQPR.[V]	1xCarbamidomethyl [C11]	P08294	WiMT
	[K].RATTVTGTPCQDWAAQEPHRHSIFTPETNPR.[A]	1xCarbamidomethyl [C10]	P00747	MS2
	[K].RAPDLQDLPWQVK.[L]		P22891	MS2
	[K].RGFGSLNDEGEGEFWLGNDYLHLLTQR.[G]		P02671	WiMT
	[R].RGHLFLQTDQPIYNPGQR.[V]		P0C0L4; P0C0L5	MS2
	[K].RGHSVCTNPSDK.[W]	1xCarbamidomethyl [C6]	Q16627	WiMT
	[K].RGIISALLVPPETEEAK.[Q]		P04114	MS2
	[R].RGLQVALEEFHK.[H]		Q99969	WiMT
	[K].RGPGGAWAAEVISNAR.[E]		P0DJI9	MS2
	[K].RGPGGVWAAEAISDAR.[E]		P0DJI8	MS2
	[R].RGTDECAIESIAVAATPIPK.[L]	1xCarbamidomethyl [C6]	P53634	WiMT
	[R].RGYQLSDVDGVTCEDIDECALPTGGHICSYR.[C]	3xCarbamidomethyl [C13; C19; C28]	P23142-4; P23142	MS2
	[R].RHDWGHEK.[Q]		P01042	MS2
	[K].RHEDTLTLFPMR.[G]		P12259	WiMT
	[K].RHIQNIDIQHLAGK.[L]		P04114	MS2
	[K].RHLVCNGDQDCLDGSDEDDCEDVR.[A]	3xCarbamidomethyl [C5; C11; C20]	P07357	MS2
	[K].RGEQCVDIDECTIPPYCHQR.[C]	3xCarbamidomethyl [C5; C11; C17]	Q12805	MS2
	[R].RGENLFAITDEGMDVPLAMEEWHHER.[E]	2xOxidation [M13; M19]	Q6UXB8	WiMT
	[R].RGENLFAITDEGMDVPLAMEEWHHER.[E]	1xOxidation [M13]	Q6UXB8	WiMT
	[R].RGENLFAITDEGMDVPLAMEEWHHER.[E]		Q6UXB8	WiMT
	[R].RELDESLQVAER.[L]		P10909-6	WiMT
	[K].REPAVGEPAEVTTTVLVR.[R]		P05362	WiMT
	[K].RESYSGVTLDPR.[G]		P01031	MS2
	[R].RFDDAVVQSDMK.[H]		P11142	WiMT
	[K].RFNALQYLR.[L]		P51884	MS2
	[R].RFTVETPDK.[N]		P05543	WiMT
	[K].RGDACEGDSGGPFVMK.[S]	1xCarbamidomethyl [C5]	P00734	MS2
	[K].RGDACEGDSGGPFVMK.[S]	1xCarbamidomethyl [C5]; 1xOxidation [M15]	P00734	WiMT
	[R].RGDSPWQVVLLDSK.[K]		P04070	MS2
	[R].RFEQLELRPVLYNYLDK.[N]		P0C0L4; P0C0L5	MS2
	[R].RALDQYLMEFNACR.[C]	1xCarbamidomethyl [C13]	P07357	MS2
	[R].QSTLSYQEPLR.[T]		P05160	WiMT
	[R].QSTLSYQEPLRT.[-]		P05160	MS2
	[R].QSTNAYPDLR.[S]		P07225	WiMT
	[R].QSVEADINGLR.[KR]		P13645; P13646	WiMT
	[R].QSVGNEAEIWLGLNDMAAEGTWVDMTGAR.[I]		P05452	WiMT
	[R].QSVGNEAEIWLGLNDMAAEGTWVDMTGAR.[I]	1xOxidation [M16]	P05452	WiMT
	[K].QTACKPEIAYAYK.[V]	1xCarbamidomethyl [C4]	P01031	MS2
	[K].QTALVELVK.[H]		P02768	MS2
	[K].QTEQTYWQATPFR.[A]		P35443	WiMT
	[R].QTHQPPAPNSLIR.[F]		P02747	MS2
	[R].QTIIVVLENVQR.[N]		P04114	MS2
	[K].QTPPYDSSHR.[I]		Q8IXL6	WiMT
	[K].QTQVSVLPEGGETPLFK.[Q]		P06396-2; P06396	MS2
	[R].QSSSYGPHGYGSGR.[S]		Q86YZ3	WiMT
	[R].QSPVDIDTHTAK.[Y]		P00918	MS2
	[R].QSMTLSSEVQIPDFDVDLGTILR.[V]	1xOxidation [M3]	P04114	MS2
	[R].QQTHMLDVMQDHFSR.[A]	2xOxidation [M5; M9]	P10909-6	WiMT
	[R].QRPEVFSDNMFCVGDETQR.[H]	1xCarbamidomethyl [C12]	Q9NZP8	MS2
	[R].QRPEVFSDNMFCVGDETQR.[H]	1xCarbamidomethyl [C12]; 1xOxidation [M10]	Q9NZP8	WiMT
	[K].QRPPDLDTSSNAVDLLFFTDESGDSR.[G]		P00736	MS2
	[R].QRQEELCLAR.[Q]	1xCarbamidomethyl [C7]	P02753	MS2
	[R].QTSPVSAMLVLVK.[S]		Q12805	MS2
	[K].QSGSECICMSPEEDCSHHSEDLCVFDTDSNDYFTSPACK.[F]	5xCarbamidomethyl [C6; C8; C15; C23; C38]	P13671	MS2
	[K].QSLEASLAETEGR.[Y]		P13645	MS2
	[K].QSLGELIGTLNAAK.[V]		P60174-1	WiMT
	[R].QSLGHGQHGSGSGQSPSPSR.[G]		Q86YZ3	WiMT
	[R].QSMTLSSEVQIPDFDVDLGTILR.[V]		P04114	MS2
	[R].QSEDSTFYLGER.[T]		P00450	MS2
	[K].QTTVSNSQQAYQEAFEISK.[K]		P31946	WiMT
	[K].QTVNLQLQPYSLVTTLNSDLK.[Y]		P04114	MS2
	[R].QTVSWAVTPK.[S]		P01023	MS2
	[R].QVVAGLNFR.[I]		P01042-2; P01042	MS2
	[K].QVVESAYEVIK.[L]		P00338	WiMT
	[K].QVVSSSEQLQSYQAEIIELR.[R]		Q15323; Q14525	WiMT
	[K].QWLCDGSDDCGDGSDEAAHCEGK.[T]	3xCarbamidomethyl [C4; C10; C20]	Q07954	WiMT
	[K].QWLEIDLLK.[I]		P12259	MS2
	[K].QWMENPNNNPIHPNLR.[S]		P15144	WiMT
	[R].QYNVGPSVSK.[Y]		P02751-10; P02751-1	MS2
	[R].QYSLQNWEAR.[L]		P48637	WiMT
	[K].QYWEYQFQHQPSQEECEGSSLSAVFEHFAMMQR.[D]	1xCarbamidomethyl [C16]	P04004	WiMT
	[K].QYWEYQFQHQPSQEECEGSSLSAVFEHFAMMQR.[D]	1xCarbamidomethyl [C16]; 1xOxidation [M30]	P04004	WiMT
	[K].QYWEYQFQHQPSQEECEGSSLSAVFEHFAMMQR.[D]	1xCarbamidomethyl [C16]; 2xOxidation [M30; M31]	P04004	WiMT
	[K].QYYEGSEIVVAGR.[I]		P19827-2; P19827	MS2
	[K].QYDADLEQILIQWITTQCR.[K]	1xCarbamidomethyl [C18]	P37802	WiMT
	[R].QQTHMLDVMQDHFSR.[A]		P10909-6	MS2
	[R].QVRPIVGPFHAVLK.[L]		P23142	MS2
	[R].QVREPGQDLVVLPLSITTDFIPSFR.[L]		P01024	WiMT
	[K].QTWTDEGSVSER.[M]		Q9NZ08	WiMT
	[K].QVCTDIDECR.[N]	2xCarbamidomethyl [C3; C9]	P35443	WiMT
	[K].QVRPEHPAETEYDSLYPEDDL.[-]		P02679	MS2
	[K].QVGSGVTTDQVQAEAK.[E]		P01871	MS2
	[R].QVLDNLTMEK.[S]	1xOxidation [M8]	P35527	MS2
	[K].QVLLVGAPTYDDVSK.[V]		P80108	MS2
	[K].LTIHNITPGDAGEYVCK.[L]	1xCarbamidomethyl [C16]	Q8IZF2	WiMT
	[R].QDPPSVVVTSHQAPGEKK.[K]		P25311	WiMT
	[R].NSITLTNLTPGTEYVVSIVALNGR.[E]		P02751-10; P02751-1	MS2
	[R].NSITLTNLTPGTEYVVSIVALNGREESPLLIGQQSTVSDVPR.[D]		P02751-10; P02751-1	WiMT
	[R].NSLWHTGDTSDQVR.[L]		P35443	WiMT
	[K].NSLYLQMNSLK.[T]		A0A0B4J1Y9	MS2
	[K].NSLYLQMNSLK.[T]	1xOxidation [M7]	A0A0B4J1Y9	MS2
	[K].NSLYLQMNSLR.[AT]		P0DP04; A0A0B4J1X8; P01780; P01766; P01762; A0A0C4DH32	MS2
	[K].NSLYLQMNSLR.[AT]	1xOxidation [M7]	P0DP04; A0A0B4J1X8; P01780; P01766; P01762; A0A0C4DH32	MS2
	[K].NSLYLQMNSLRAEDTAVYYCAR.[-]	1xCarbamidomethyl [C20]	P01780; P01762	MS2
	[K].NSNPALNDNLEK.[G]		O00299	WiMT
	[K].NSLLGMEGANSIFSGFLLFPDMEA.[-]	2xOxidation [M6; M22]	P02746	WiMT
	[K].NSLLGMEGANSIFSGFLLFPDMEA.[-]	1xOxidation [M22]	P02746	WiMT
	[K].NSLLGMEGANSIFSGFLLFPDMEA.[-]		P02746	MS2
	[K].NRPTSISWDGLDSGK.[L]		P30086	WiMT
	[K].NSCPPTSELLGTSDR.[L]	1xCarbamidomethyl [C3]	P22352	MS2
	[K].NSEEFAAAMSR.[Y]		P04114	MS2
	[K].NSEEFAAAMSR.[Y]	1xOxidation [M9]	P04114	MS2
	[K].NSGLTEEEAK.[H]		P13671	MS2
	[R].NSVDELNNNVEAVSQTSSSSFQYMYLLK.[D]		P02675	MS2
	[R].NSLCIENSCIAAHDK.[R]	2xCarbamidomethyl [C4; C9]	Q15582	MS2
	[K].NSLDCEIVSAK.[S]	1xCarbamidomethyl [C5]	Q01518	MS2
	[K].NSLESYAFNMK.[A]		P11142	WiMT
	[K].NSLFEYQK.[N]		P02671	MS2
	[K].NSLFFSAQPFEITASTNNEGNLK.[V]		P04114	MS2
	[R].NSLGGFASTQDTTVALK.[A]		Q6YHK3	WiMT
	[K].NSIAYMDEETGNLK.[K]		P08123	WiMT
	[K].NRPSSGSLIQVVTTEGR.[T]		P09417	WiMT
	[R].NSVDELNNNVEAVSQTSSSSFQYMYLLK.[D]	1xOxidation [M24]	P02675	MS2
	[K].NSVVEASEAAYK.[E]		Q04917	WiMT
	[K].NTLYLQMSSLR.[A]		A0A0J9YX35	MS2
	[K].NTMILEICTR.[Y]	1xCarbamidomethyl [C8]	P01024	MS2
	[K].NTMILEICTR.[Y]	1xCarbamidomethyl [C8]; 1xOxidation [M3]	P01024	MS2
	[R].NTPEYEELCPR.[G]	1xCarbamidomethyl [C9]	P35555	WiMT
	[K].NTVISVNPSTK.[L]		P19320	MS2
	[K].NTWSILHTQGALVQGGYGHSSVYDHR.[T]		O75882	MS2
	[R].NVALVSGDTENAK.[G]		Q16610	MS2
	[R].NVDDCSPDPCHHGR.[C]	2xCarbamidomethyl [C5; C10]	Q9UM47	WiMT
	[R].NVDGVNYASITR.[N]		Q9UBR2	WiMT
	[R].NVGSQTLQTFK.[A]		P08514	MS2
	[R].NVHSGSTFFK.[Y]		Q14624	MS2
	[K].NTLYLQMNSLRAEDTAVYYCAK.[-]	1xCarbamidomethyl [C20]	P01768; P01764	MS2
	[K].NTLYLQMNSLR.[A]	1xOxidation [M7]	P01768; A0A0B4J1X5; P01764; P01767	MS2
	[K].NTLYLQMNSLR.[A]		P01768; A0A0B4J1X5; P01764; P01767	MS2
	[K].NTLYLQMNSLK.[T]		A0A0B4J1V0	MS2
	[K].NTAEWLLSHTK.[H]		P00491	WiMT
	[K].NTASLKYENYELTLK.[S]		P04114	WiMT
	[K].NTAYLQMNSLK.[T]		A0A0B4J1V6	WiMT
	[K].NTCNHDEDTWVECEDPFDLR.[L]	2xCarbamidomethyl [C3; C13]	O43866	MS2
	[R].NTEILTGSWSDQTYPEGTQAIYK.[C]		P08603	MS2
	[R].NTEQEEGGEAVHEVEVVIK.[H]		P00742	MS2
	[R].NTFAEVTGLSPGVTYYFK.[V]		P02751-10; P02751-1	MS2
	[R].NTGIICTIGPASR.[S]	1xCarbamidomethyl [C6]	P14618-2; P14618	MS2
	[R].NTGTEAPDYLATVDVDPK.[S]		Q13228	WiMT
	[R].NTGVISVVTTGLDR.[E]		P12830	WiMT
	[R].NTIEETGNLAEQAR.[A]		P11047	WiMT
	[K].NTLELSNGVIVK.[I]		P04114	MS2
	[K].NTLYLQMNNLR.[A]		A0A0C4DH36	MS2
	[K].NTLYLQMNNLR.[A]	1xOxidation [M7]	A0A0C4DH36	WiMT
	[R].NRNVHSAGAAGSR.[M]		Q14624-2	MS2
	[K].NRMDVFSQNMFCAGHPSLK.[Q]	1xCarbamidomethyl [C12]	P00736	WiMT
	[K].NPDEEDNTFYQR.[L]		Q9BS40	WiMT
	[R].NPDGDPGGPWCYTTDPAVR.[F]	1xCarbamidomethyl [C11]	P26927	MS2
	[R].NPDGDVGGPWCYTTNPR.[K]	1xCarbamidomethyl [C11]	P00747	MS2
	[R].NPDGDVGGPWCYTTNPRK.[L]	1xCarbamidomethyl [C11]	P00747	MS2
	[R].NPDGSERPWCYTTDPQIER.[E]	1xCarbamidomethyl [C10]	Q2TV78; P26927	MS2
	[R].NPDNDIRPWCFVLNR.[D]	1xCarbamidomethyl [C10]	P00748	MS2
	[R].NPDNDPQGPWCYTTDPEK.[R]	1xCarbamidomethyl [C11]	P00747	MS2
	[R].NPDPVAAPWCYTTDPSVR.[W]	1xCarbamidomethyl [C10]	P08519	WiMT
	[R].NPDSSTTGPWCYTTDPTVR.[R]	1xCarbamidomethyl [C11]	P00734	MS2
	[R].NPELQNLLLDDFFK.[S]		P52209	WiMT
	[R].NPETDTYILFNPWCEDDAVYLDNEK.[E]	1xCarbamidomethyl [C14]	P00488	WiMT
	[R].NPDDITNEEYGEFYK.[S]		P07900	WiMT
	[R].NPDAVAAPYCYTR.[D]	1xCarbamidomethyl [C10]	P08519	MS2
	[R].NNANGVDLNR.[N]		P15169	MS2
	[R].NNEEWTVDSCTECHCQNSVTICK.[K]	4xCarbamidomethyl [C10; C13; C15; C22]	P07996	MS2
	[R].NNEEYLALIFEK.[G]		O00391	WiMT
	[K].NNEGTYYSPNYNPQSR.[S]		P00450	MS2
	[R].NNLELSTPLK.[I]		P07225	MS2
	[K].NPFGLVPVLENSQGQLIYESAITCEYLDEAYPGK.[K]	1xCarbamidomethyl [C24]	P78417	WiMT
	[R].NNNRPSGISER.[F]		A0A075B6I4	MS2
	[R].NNSPYEIENGVVWVSFR.[G]		P02671	MS2
	[R].NPCQDPYILTPENR.[C]	1xCarbamidomethyl [C3]	Q12805	MS2
	[R].NPCTDGTHDCNK.[N]	2xCarbamidomethyl [C3; C10]	P07996	WiMT
	[R].NPDAEIRPWCYTMDPSVR.[W]	1xCarbamidomethyl [C10]	P08519	WiMT
	[R].NNQIDHIDEK.[A]		P51884	MS2
	[K].NQFSLQLNSVTPEDTAVYYCAR.[-]	1xCarbamidomethyl [C20]	A0A0B4J1U7	WiMT
	[K].NQGILEFYGDDIALLK.[L]		P06681	WiMT
	[R].NQGNTWLTAFVLK.[T]		P01023; P20742	MS2
	[R].NQGNTWLTAFVLKTFAQAR.[AS]		P01023; P20742	WiMT
	[K].NQILNLTTDNANILLQIDNAR.[L]		P13645	MS2
	[K].NQLTSNPENTVFDAK.[R]		P11021	WiMT
	[K].NQVALNPQNTVFDAK.[R]		P0DMV9	WiMT
	[K].NQVAMNPTNTVFDAK.[R]		P11142	WiMT
	[K].NQVVIAAGR.[S]		P80108	MS2
	[K].NQVVLTMTNMDPVDTATYYCAHR.[-]	1xCarbamidomethyl [C20]	P01817	MS2
	[K].NQVVLTMTNMDPVDTATYYCAR.[I]	1xCarbamidomethyl [C20]	A0A0C4DH43	MS2
	[R].NRCPPPPLPINSK.[I]	1xCarbamidomethyl [C3]	P05160	WiMT
	[R].NRDVVLTTTFVDDIK.[A]		P02748	MS2
	[K].NQVSLTCLVK.[G]	1xCarbamidomethyl [C7]	P01857; P01861; P01859; P01860	MS2
	[K].NVIIWGNHSSTQYPDVNHAK.[V]		P40925	WiMT
	[K].NQFNDYTSK.[K]		P06276	MS2
	[K].NQDVHSINLPFFETLQEYFER.[N]		P04114	MS2
	[K].NPLGEGPVSNTVAFSTESADPR.[V]		Q7Z7G0	WiMT
	[K].NPLVWVHASPEHVVVTR.[N]		Q14624-2; Q14624	MS2
	[K].NPNGYSFSIPVK.[V]		P04114	MS2
	[R].NPNLPPETVDSLK.[N]		P05090	MS2
	[K].NPREDYLDVYVFGVGPLVNQVNINALASK.[K]		P00751	WiMT
	[R].NQECIALPENICGIGWHLVGNSCLK.[I]	3xCarbamidomethyl [C4; C12; C23]	O75882	MS2
	[R].NPSRNNVPCSPK.[V]	1xCarbamidomethyl [C9]	P0C0L4; P0C0L5	WiMT
	[R].NPSSAGSWNSGSSGPGSTGNR.[N]		P02671	MS2
	[R].NPTDSLYCCDR.[A]	2xCarbamidomethyl [C8; C9]	O95980	WiMT
	[R].NPVNYFAEVEQIAFDPSNMPPGIEASPDK.[M]		P04040	WiMT
	[R].NPYYGGESSSITPLEELYK.[R]		P31150	WiMT
	[R].QDPPSVVVTSHQAPGEK.[K]		P25311	MS2
	[R].NVPDDILQLLK.[K]		Q9H4A9	WiMT
	[L].PTGDVIGDSAK.[Y]		P01023	MS2
	[K].PTLSQQQK.[S]		Q14624-2; Q14624	MS2
	[R].PVAFSVVPTAAAAVSLK.[V]		P0C0L4	MS2
	[R].PVAFSVVPTAATAVSLK.[V]		P0C0L5	MS2
	[F].PVEMTHNHNFR.[L]	1xOxidation [M4]	P05546	WiMT
	[L].PVLESFK.[V]		P02647	MS2
	[K].PVNTFVHEPLVDVQNVCFQEK.[V]	1xCarbamidomethyl [C17]	P07998	MS2
	[K].PVTLWCQGPLETEEYR.[L]	1xCarbamidomethyl [C6]	O75023	WiMT
	[E].PYADQLR.[T]		P06727	MS2
	[M].PYQYPALTPEQK.[K]		P04075	WiMT
	[K].QAAGSGHLLALGTPENPSWLSLHLQDQK.[V]		P04278	MS2
	[P].PSVVVTSHQAPGEK.[K]		P25311	WiMT
	[Q].PSGGTNINEALLR.[A]		P19823	WiMT
	[K].PLSVSYDQATSLR.[I]		P00918	MS2
	[K].PISVSYNPATAK.[E]		P00915	MS2
	[T].PLTATLSK.[S]		P01876	MS2
	[K].PIWLSQMSCSGR.[E]	1xCarbamidomethyl [C9]	O43866	MS2
	[S].PIYNLVPVK.[M]		P02748	WiMT
	[T].PNLAEFAFSLYR.[Q]		P01009	MS2
	[D].PPSVVVTSHQAPGEK.[K]		P25311	MS2
	[T].PQQAQEVHEK.[L]		P60174-1	WiMT
	[D].PQTFYYAVAVVK.[K]		P02787	MS2
	[K].PSAGNNSLYR.[D]		P02749	WiMT
	[I].PSDGPSVACVK.[K]	1xCarbamidomethyl [C9]	P02787	MS2
	[P].PPPLPINSK.[I]		P05160	WiMT
	[F].PLSSEPFQGSYK.[V]		P01023	WiMT
	[R].QAELTVQVK.[GE]		P15151	WiMT
	[K].QAFDDAIAELDTLNEDSYK.[D]		Q04917	WiMT
	[K].QCSKEDGGGWWYNR.[C]	1xCarbamidomethyl [C2]	P02675	MS2
	[K].QCTMFYSTSNIK.[I]	1xCarbamidomethyl [C2]	P01031	MS2
	[K].QCTMFYSTSNIK.[I]	1xCarbamidomethyl [C2]; 1xOxidation [M4]	P01031	MS2
	[K].QCVPHDQCACGVLTSEK.[R]	3xCarbamidomethyl [C2; C8; C10]	P22891	MS2
	[R].QCVPTEPCEDAEDDCGNDFQCSTGR.[C]	4xCarbamidomethyl [C2; C8; C15; C21]	P02748	MS2
	[R].QCVYDLCAQK.[G]	2xCarbamidomethyl [C2; C7]	Q9Y6R7	WiMT
	[K].QDACQGDSGGVFAVR.[D]	1xCarbamidomethyl [C4]	P00736	MS2
	[K].QDACQGDSGGVFAVRDPNTDR.[W]	1xCarbamidomethyl [C4]	P00736	MS2
	[R].QDGHLWCSTTSNYEQDQK.[Y]	1xCarbamidomethyl [C7]	P02751-10; P02751-1	MS2
	[R].QDGSVDFGRK.[W]		P02675	MS2
	[R].QDGVVVTINK.[K]		P19827-2; P19827	WiMT
	[R].QDLGSPEGIAVDHLGR.[N]		P14543	WiMT
	[K].QCSHQISACNK.[D]	2xCarbamidomethyl [C2; C9]	P03951	MS2
	[R].QCRPNGMWDGETAVCDNGAGHCPNPGISLGAVR.[T]	3xCarbamidomethyl [C2; C15; C22]	P06681	WiMT
	[K].QCQDLGAFTESMVVFGCPN.[-]	2xCarbamidomethyl [C2; C17]; 1xOxidation [M12]	P01024	WiMT
	[K].QCQDLGAFTESMVVFGCPN.[-]	2xCarbamidomethyl [C2; C17]	P01024	MS2
	[R].QAGLGNHLSGSER.[L]		Q15582	WiMT
	[K].QAGPASVPLR.[T]		P30101	WiMT
	[K].QALEEFQK.[E]		P07358	MS2
	[K].QALNTDYLDSDYQR.[G]		O94919	WiMT
	[R].QAPGQGLEWMGGIIPIFGTANYAQK.[F]		P01742; A0A0B4J2H0	MS2
	[R].QAEVTFVGHPGNLVIK.[Q]		P14543	WiMT
	[K].QAVAQILPFR.[D]		O95479	WiMT
	[R].QAVDTAVDGVFIR.[S]		P19827	MS2
	[R].QAVQELVSLYYEEAR.[S]		P54802	WiMT
	[R].QAWVWAAVR.[G]		Q76LX8	WiMT
	[K].QCGHQISACHR.[D]	2xCarbamidomethyl [C2; C9]	P03952	MS2
	[R].QAQCGQDFQCK.[E]	2xCarbamidomethyl [C4; C10]	P07357	MS2
	[F].PILLDFK.[T]		P05546	MS2
	[K].NWGLSFYADKPETTK.[E]		P19652	MS2
	[K].NWGLSVYADK.[P]		P02763	MS2
	[K].NWGLSVYADKPETTK.[E]		P02763	MS2
	[K].NWIQYKEGFGHLSPTGTTEFWLGNEK.[I]		P02679-2; P02679	MS2
	[R].NWMNSLGVNPR.[V]		P13796	WiMT
	[K].NWQWGGLTCDHYEEAK.[I]	1xCarbamidomethyl [C9]	Q86VB7	WiMT
	[K].NWRDPDQTDGLGLSYLSSHIANVER.[V]		P06396-2; P06396	MS2
	[K].NYAEAKDVFLGMFLYEYAR.[R]		P02768	WiMT
	[K].NYAEVGR.[V]		P00739	MS2
	[K].NYCGLPGEYWLGNDK.[I]	1xCarbamidomethyl [C3]	P02675	MS2
	[K].NYCGLPGEYWLGNDKISQLTR.[M]	1xCarbamidomethyl [C3]	P02675	MS2
	[K].NYCRNPDGDVGGPWCYTTNPR.[K]	2xCarbamidomethyl [C3; C15]	P00747	MS2
	[K].NYCRNPDGDVGGPWCYTTNPRK.[L]	2xCarbamidomethyl [C3; C15]	P00747	MS2
	[K].NYNLVESLK.[L]		P05546	MS2
	[R].NWGLGGHAFCR.[N]	1xCarbamidomethyl [C10]	P00748	MS2
	[K].NWETEITAQPDGGK.[T]		P05452	MS2
	[R].NVWVHLDGPGVTRPMK.[K]	1xOxidation [M15]	P00488	WiMT
	[K].NVPLPVIAELPPK.[V]		P01871	MS2
	[R].NVQALEIELQSQLALK.[Q]		P13645	WiMT
	[K].NVQDAIADAEQR.[G]		P35908	WiMT
	[K].NVQDAIADAEQRGEHALK.[D]		P35908	MS2
	[R].NVQFNYPHTSVTDVTQNNFHNYFGGSEIVVAGK.[F]		P19823	MS2
	[R].NVSTGDVNVEMNAAPGVDLTQLLNNMR.[S]		P13645	WiMT
	[R].NVSTGDVNVEMNAAPGVDLTQLLNNMR.[S]	1xOxidation [M11]	P13645	MS2
	[K].NVVFVIDISGSMR.[G]		P19827-2; P19827	WiMT
	[K].NVVFVIDISGSMR.[G]	1xOxidation [M12]	P19827-2; P19827	WiMT
	[K].NVVYTCNEGYSLIGNPVAR.[C]	1xCarbamidomethyl [C6]	P10643	MS2
	[R].NVWVHLDGPGVTRPMK.[K]		P00488	WiMT
	[R].NVSTGDVNVEMNAAPGVDLTQLLNNMR.[S]	2xOxidation [M11; M26]	P13645	WiMT
	[K].NYSPYYNTIDDLK.[D]		P35527	MS2
	[S].PAFLASQNTK.[G]		P20742	WiMT
	[K].PFDAFTDLK.[N]		P04004	MS2
	[M].PFDPQDTHQSR.[F]		P01011	MS2
	[R].PFLVFIR.[E]		P01008	WiMT
	[H].PFTVEEFVLPK.[F]		P01023; P20742	WiMT
	[C].PGDALFDLLR.[T]		Q96PD5	WiMT
	[E].PGENSEILPTLK.[Y]		P22352	WiMT
	[L].PEVFLSK.[V]		P02774	MS2
	[R].PGGGFVPNFQLFEK.[G]		P22352	MS2
	[K].PGQDTCQGDSGGPLTCEK.[D]	2xCarbamidomethyl [C6; C16]	Q14520	MS2
	[E].PGVDYVYK.[T]		P01024	WiMT
	[I].PHHNYNAAINK.[Y]		P00740	WiMT
	[A].PLAEDVR.[G]		P06727	MS2
	[K].PLIGTVLAMDPDAAR.[H]		P33151	WiMT
	[L].PGHSAGPR.[T]		P17813	WiMT
	[K].NVNIQNFHISWK.[D]		P12814	WiMT
	[F].PEVDVLTK.[Y]		P04114	WiMT
	[R].PAFSAIR.[R]		P02745	MS2
	[R].PAHVVVGDVLQAADVDK.[T]		P30043	WiMT
	[A].PANADFAFR.[F]		P29622	WiMT
	[R].PAPEDLTVVLGQER.[R]		P00748	MS2
	[L].PAQLPAEK.[E]		Q16610-3; Q16610	MS2
	[K].PATPEIQEIVDK.[V]		P01040	WiMT
	[S].PELQAEAK.[S]		P02652	MS2
	[D].PAVSVALGQTVR.[I]		P01714	MS2
	[V].PDTFEGHFDGVPVISK.[G]		P19823	WiMT
	[G].PDVLTATVSGK.[L]		Q14624-2; Q14624	WiMT
	[K].PDVSHGEMVSGFGPIYNYK.[D]	1xOxidation [M8]	P04003	WiMT
	[L].PEGGETPLFK.[Q]		P06396-2; P06396	WiMT
	[N].PDGDVGGPWCYTTNPR.[K]	1xCarbamidomethyl [C10]	P00747	WiMT
	[R].LTIGEGQQHHLGGAK.[Q]		P02679-2; P02679	MS2
	[K].LTIESTPFNVAEGK.[E]		P40199	WiMT
	[K].LEEQAQQIR.[L]		P02649	MS2
	[K].LEESYDMESVLR.[N]		P35237	WiMT
	[K].IEFEWNTGTNVDTK.[K]		P04114	MS2
	[K].IEFISTMEGYK.[Y]		Q92820	WiMT
	[K].IEFPILEDSSELQLK.[A]		Q6YHK3	MS2
	[K].IEGDEEMHCSDDGFWSK.[E]	1xCarbamidomethyl [C9]	P08603	MS2
	[K].IEGDEEMHCSDDGFWSK.[E]	1xCarbamidomethyl [C9]; 1xOxidation [M7]	P08603	MS2
	[K].IEGDHGARVVLVAVDK.[G]		P01024	WiMT
	[K].LEGDSTDLSDQIAELQAQIAELK.[M]		P35579	WiMT
	[R].LEGEACGVYTPR.[C]	1xCarbamidomethyl [C6]	P18065	WiMT
	[R].LEGEVFFATR.[L]		P16112-2	WiMT
	[K].LEEIDGFFAR.[N]		O00391	WiMT
	[A].LEELAAK.[E]		Q9C0B1	MS2
	[K].LECNGENDCGDNSDER.[D]	2xCarbamidomethyl [C3; C9]	P13671	MS2
	[K].LECNGENDCGDNSDERDCGR.[T]	3xCarbamidomethyl [C3; C9; C18]	P13671	MS2
	[K].IECVSAETTEDCIAK.[I]	2xCarbamidomethyl [C3; C12]	P02787	MS2
	[R].IEDANLIPPVPDDK.[F]		P07996	MS2
	[K].IEGNLIFDPNNYLPK.[E]		P04114	WiMT
	[R].IEDLPTMVTLGNSFLHK.[L]		P04275	MS2
	[R].IEDLPTMVTLGNSFLHK.[L]	1xOxidation [M7]	P04275	WiMT
	[R].LEDMEQALSPSVFK.[A]		P05155	MS2
	[R].LEDMEQALSPSVFK.[A]	1xOxidation [M4]	P05155	WiMT
	[R].LEDSVTYHCSR.[G]	1xCarbamidomethyl [C9]	P00751	MS2
	[R].LEDGVQACHATGCGR.[C]	2xCarbamidomethyl [C8; C13]	Q9Y6R7	WiMT
	[K].LECFALGNPIPQINWR.[R]	1xCarbamidomethyl [C3]	Q9P232	WiMT
	[K].LEGQMGEDGNSIK.[V]	1xOxidation [M5]	P13591	WiMT
	[R].LENNHAQLLR.[R]		O95810	WiMT
	[K].IENVSYQDK.[G]		O00533	WiMT
	[R].LEPGQQEEYYR.[K]		P04180	MS2
	[R].LEPYADQLR.[T]		P06727	MS2
	[K].LEQGENVFLQATDK.[N]		P02746	MS2
	[R].LEQYEGPGFCGPLAPGTGGPFTTCHAHVPPESFFK.[G]	2xCarbamidomethyl [C10; C24]	Q9Y6R7	WiMT
	[K].LESDVSAQMEYCR.[T]	1xCarbamidomethyl [C12]	P02675	MS2
	[K].LESDVSAQMEYCR.[T]	1xCarbamidomethyl [C12]; 1xOxidation [M9]	P02675	MS2
	[K].LENLEPEHEYK.[C]		P08575	WiMT
	[K].IENCNYAVELGK.[NH]	1xCarbamidomethyl [C4]	P13796; P13797	WiMT
	[K].LEMNYVVGGVVSHR.[N]		P23142	WiMT
	[K].LEGSAPTDVLDSLTTIPELK.[D]		Q86UX7	WiMT
	[K].LEHEYIQNFK.[I]		Q15691	WiMT
	[K].IEIDPQFQVVR.[T]		Q8N1N4	WiMT
	[R].LELELRPTGEIEQYSVSATYELQR.[E]		P04114	MS2
	[K].LEGQMGEDGNSIK.[V]		P13591	WiMT
	[R].IEIESFYEGEDFSETLTR.[A]		P11021	WiMT
	[K].LELLSLSK.[N]		P22792	MS2
	[K].IEIPLPFGGK.[S]		P04114	MS2
	[K].LEIQSQVDSQHVGHSVLTAK.[G]		P04114	MS2
	[R].IEISSPCCPR.[Q]	2xCarbamidomethyl [C7; C8]	Q5T749	WiMT
	[K].LELSVDGAKQYR.[N]		P0C0L4; P0C0L5	WiMT
	[R].LEIWDGFPDVGPHIGR.[Y]		O14786	WiMT
	[R].LELHVDGPPPRPQLR.[A]		P04217; P04217-2	MS2
	[R].LEALPNSLLAPLGR.[L]		P35858	MS2
	[K].LEAGINQLSFPLSSEPIQGSYR.[V]		P20742	MS2
	[K].LDGICWQVR.[Q]	1xCarbamidomethyl [C5]	P07360	MS2
	[R].IDLAVGDVVK.[T]		Q86UX7	WiMT
	[R].LDIDSPPITAR.[N]		P14618-2; P14618	WiMT
	[R].LDLQEINNWVQAQMK.[G]		P36955	MS2
	[R].LDLQEINNWVQAQMK.[G]	1xOxidation [M14]	P36955	WiMT
	[R].IDITLSSVK.[C]		Q08380	WiMT
	[K].IDNSQVESGSLEDDWDFLPPK.[K]		P27797	WiMT
	[K].LDPHLVLDQLR.[C]		P35579	MS2
	[K].IDPLEVEEGDPIVLPCNPPK.[G]	1xCarbamidomethyl [C16]	O00533	WiMT
	[R].IDPSDSYTNYSPSFQGHVTISADK.[S]		A0A0J9YXX1	MS2
	[K].IDPSHTQGYR.[T]		P40189	WiMT
	[R].LDGLCIPLR.[W]	1xCarbamidomethyl [C5]	Q07954	WiMT
	[K].LDGGQLVWETLMDSR.[L]		Q7Z7M0	WiMT
	[R].LDGFPPGRPSPDNLNQICLPNR.[Q]	1xCarbamidomethyl [C18]	Q16610-3; Q16610	MS2
	[K].LDDDLEHQGGHVLDHGHK.[H]		P01042	MS2
	[K].LDDGHLNNSLSSPVQADVYFPR.[L]		Q3ZCW2	WiMT
	[K].IDDIWNLEVK.[E]		P04114	MS2
	[K].IDDPTDSKPEDWDKPEHIPDPDAK.[K]		P27797	WiMT
	[K].LDELRDEGK.[A]		P02768	MS2
	[K].LDELRDEGKASSAK.[Q]		P02768	MS2
	[K].IDFLNNYALFLSPSAQQASWQVSAR.[F]		P04114	MS2
	[K].IDFSEFLSLLGDIATDYHK.[Q]		P31151	WiMT
	[K].LDFSSQADLR.[N]		P04114	WiMT
	[K].LDFSSQADLRNEIK.[T]		P04114	MS2
	[K].LDGCFSTPEER.[A]	1xCarbamidomethyl [C4]	P17050	WiMT
	[K].IDGDTIIFSNVQER.[S]		Q92823	WiMT
	[K].LDFGNSQGK.[T]		O75223	WiMT
	[K].LDQGGAPLAGTNK.[E]		P05062	MS2
	[K].IDQLEGDHQLIQEALIFDNK.[H]		P12814	WiMT
	[KR].IDVCPENAEVTLTDFR.[A]	1xCarbamidomethyl [C4]	P35443; P49747	MS2
	[R].LDVDQALNR.[S]		P04278	WiMT
	[K].IDVHLVPDRK.[K]		P08603	MS2
	[K].IDVHWTR.[A]		P25311	MS2
	[K].IDVMPIQILANEEMK.[V]		Q8IZF2	WiMT
	[R].LDVPQNLMFGK.[W]		Q13740	WiMT
	[R].LDTSRDGWHSWPIAHQWPQGPSAVDAAFSWEEK.[L]		P02790	WiMT
	[R].LDYQEGPPGVEISCWSVEL.[-]	1xCarbamidomethyl [C14]	Q14624-2; Q14624	MS2
	[R].LEACESLTR.[V]	1xCarbamidomethyl [C4]	Q04756	WiMT
	[R].LEAGDHPVELLAR.[D]		P09486	WiMT
	[K].LDVQFSGLTK.[G]		P21333	MS2
	[K].LESDVSAQMEYCRTPCTVSCNIPVVSGK.[E]	3xCarbamidomethyl [C12; C16; C20]	P02675	MS2
	[K].IDTQDIEASHYR.[G]		P01031	MS2
	[R].IDTINLFPATLFDAYMVAQNPGEWMLSCQNLNHLK.[A]	1xCarbamidomethyl [C28]; 1xOxidation [M]	P00450	WiMT
	[K].LDQIESVITATSANTQLVLETLAQMDDLQDFLSK.[D]		P19823	WiMT
	[K].LDQIESVITATSANTQLVLETLAQMDDLQDFLSK.[D]	1xOxidation [M25]	P19823	WiMT
	[K].IDQNVEELK.[G]		P06727	MS2
	[K].IDQTVEELRR.[S]		P06727	MS2
	[R].LDRENISEYHLTAVIVDK.[D]		P33151	WiMT
	[K].IDRFMQAVTGWK.[T]		P01019	MS2
	[R].IDSLLENDR.[Q]		P10909-6	MS2
	[R].IDTINLFPATLFDAYMVAQNPGEWMLSCQNLNHLK.[A]	1xCarbamidomethyl [C28]; 2xOxidation [M16; M25]	P00450	WiMT
	[R].IDSLLENDRQQTHMLDVMQDHFSR.[A]		P10909-6	MS2
	[K].LDSLVAQQLQSK.[N]		Q9Y6R7	MS2
	[K].LDSTDFTGTIK.[L]		P02786	MS2
	[K].IDSTGNVTNELR.[V]		O75882	WiMT
	[R].IDSVSEGNAGPYR.[C]		Q6GTX8	WiMT
	[R].LDTLAQEVALLK.[E]		P05452	MS2
	[R].IDTINLFPATLFDAYMVAQNPGEWMLSCQNLNHLK.[A]	1xCarbamidomethyl [C28]	P00450	MS2
	[R].IDSLLENDRQQTHMLDVMQDHFSR.[A]	1xOxidation [M]	P10909-6	WiMT
	[K].IDAVYEAPQEEK.[A]		P08253	MS2
	[R].LESEETMVLEAHDAQGDVPVTVTVHDFPGK.[K]		P01024	MS2
	[K].LGNWSAMPSCK.[A]	1xCarbamidomethyl [C10]	P02749	WiMT
	[K].IGPDNLPYVQILK.[TVH]		P11362	WiMT
	[K].LGPEAFR.[F]		P33908	WiMT
	[K].IGPECVDIDECR.[Y]	2xCarbamidomethyl [C5; C11]	O95967	WiMT
	[K].LGPHAGDVEGHLSFLEK.[D]		P06727	MS2
	[R].LGPISADSTTAPLEK.[E]		P22105-1	WiMT
	[K].IGPITPLEFYR.[E]		Q13867	WiMT
	[R].LGPLVEQGR.[V]		P02649	MS2
	[R].IGQDGISTSATTNLK.[C]		P04114	MS2
	[V].LGQEQDSYGGK.[F]		P02743	WiMT
	[V].LGQLGITK.[V]		P01009	MS2
	[R].LGQSDPAPLQHQMDIYQK.[R]		P29401	WiMT
	[K].LGNQEPGGQTALK.[S]		P08697	MS2
	[K].LGNFPWQAFTSIHGR.[G]		Q9NZP8	MS2
	[R].LGMFNIQHCKK.[L]	1xCarbamidomethyl [C9]	P01009	MS2
	[K].IGGAIEEVYVSLGVSVGK.[C]		P07358	WiMT
	[K].IGGGEPSLPSEK.[V]		Q9P232	WiMT
	[R].LGGPEAGLGEYLFER.[L]		P02792	WiMT
	[K].LGGSPTSLGTWGSWIGPDHDK.[F]		P14314	WiMT
	[K].LGGSQEDQIK.[N]		P37837	WiMT
	[K].LGQSLDCNAEVYVVPWEK.[K]	1xCarbamidomethyl [C7]	P01042-2; P01042	MS2
	[K].LGGTCVNVGCVPK.[K]	2xCarbamidomethyl [C5; C10]	P00390	WiMT
	[K].LGHPDTLNQGEFK.[E]		P06702	WiMT
	[K].LGLDFPNLPYLIDGTHK.[I]		P28161	WiMT
	[K].LGLDIEIATYR.[R]		P78386; Q9NSB4; P78385	WiMT
	[R].IGITNHDEYSLVR.[E]		Q9Y490	MS2
	[R].LGMFNIQHCK.[K]	1xCarbamidomethyl [C9]	P01009	MS2
	[R].LGMFNIQHCK.[K]	1xCarbamidomethyl [C9]; 1xOxidation [M3]	P01009	MS2
	[R].LGHLLHIRDEK.[K]		P80108	MS2
	[R].LGFTDLFSK.[W]		P29622	MS2
	[K].LGQYASPTAK.[R]		P0C0L4; P0C0L5	MS2
	[R].LGSLGAACEQTQTEGAK.[A]	1xCarbamidomethyl [C8]	P07357	MS2
	[K].LHELQEKLSPLGEEMR.[D]		P02647	WiMT
	[R].IHFPLATYAPVISAEK.[A]		P68363; P68366	MS2
	[K].LHGDCQDLQK.[Q]	1xCarbamidomethyl [C5]	P04275	WiMT
	[K].IHGILSNTHR.[Q]		Q6UX71	MS2
	[K].LHIDDMEFEPK.[Q]		P19320	WiMT
	[K].LHIDEMDSVPTVR.[Q]		P19320	WiMT
	[K].LHIDEMDSVPTVR.[Q]	1xOxidation [M6]	P19320	WiMT
	[K].LHLDYIGPCK.[Y]	1xCarbamidomethyl [C9]	P09486	WiMT
	[R].LHLEGYHGTAGDSMSYHSGSVFSAR.[D]		P22105-1	WiMT
	[K].LHLETDSLALVALGALDTALYAAGSK.[S]		P0C0L4; P0C0L5	MS2
	[K].IHIGSSFEK.[Y]		Q96IY4	MS2
	[K].IHLISTQSAIPYALR.[V]		P02679-2; P02679	MS2
	[R].LHEAFSPVSYQHDLALLR.[L]		P00748	MS2
	[K].LHDRNTYEK.[Y]		P02787	MS2
	[R].LHDNQNGWSGDSAPVELILSDETLPAPEFSPEPESGR.[A]		P04217; P04217-2	MS2
	[R].IHALGPNYNLVISDLR.[M]		Q9UIB8	WiMT
	[K].LGSLQELFLDSNNISELPPQVFSQLFCLER.[L]	1xCarbamidomethyl [C27]	P22792	WiMT
	[R].LGTFEVEDQIEAAR.[Q]		P27487	WiMT
	[K].LGVIEDHSNR.[T]		P14625	WiMT
	[K].LGQYASPTAKR.[C]		P0C0L4; P0C0L5	WiMT
	[R].LGVLTVTDTTPDSMR.[L]	1xOxidation [M14]	P22105-1	WiMT
	[K].LGVRPSQGGEAPR.[E]		P02751-10; P02751-1	MS2
	[R].LGVYELLLK.[V]		Q14624-2; Q14624	MS2
	[K].LGVYEVEDQITAVR.[K]		Q12884	WiMT
	[R].IGWPNAPILIQDFETLPR.[E]		P04275	MS2
	[K].LGYVTADGETSGSITCGK.[D]	1xCarbamidomethyl [C16]	P08603	MS2
	[R].LGVQDLFNSSK.[A]		P30740	WiMT
	[K].LGEVNTYAGDLQK.[K]		P06727	MS2
	[L].LGEVDHYQLALGK.[F]		O75636	WiMT
	[R].IGESIELTCPK.[G]	1xCarbamidomethyl [C9]	P13671	MS2
	[R].IFFESVYGQCK.[A]	1xCarbamidomethyl [C10]	Q9UGM5	MS2
	[R].IFFHLNAVALGDGGHYTCR.[Y]	1xCarbamidomethyl [C18]	P04217; P04217-2	MS2
	[K].IFFPGVSEFGK.[E]		P06276	MS2
	[R].LFFSQQQPEQLVPGPGPAPMPSDFQVLR.[A]		O95479	WiMT
	[K].IFFYDSENPPASEVLR.[I]		P27169	MS2
	[R].LFGSPLSDYYAYSPVR.[E]		O95479	WiMT
	[K].LFHTNFYDTVGTIQLINDHVK.[K]		P29622	MS2
	[R].LFLEPTQADIALLK.[L]		P08519	MS2
	[K].IFLMDLNEQNPR.[A]		Q15166	WiMT
	[K].LFLSYDYAVK.[K]		Q9UHG3	MS2
	[K].IFNGIPDWVYEEEMLATK.[Y]		Q12884	WiMT
	[K].IFNHCFTGNCVIDWLVSNQSVR.[N]	2xCarbamidomethyl [C5; C10]	P08567	WiMT
	[R].LFENQLVGPESIAHIGDVMFTGTADGR.[V]		Q9HDC9	WiMT
	[K].LFDSDPITVTVPVEVSRK.[N]		P10909-6	MS2
	[K].LFDSDPITVTVPVEVSR.[K]		P10909-6	MS2
	[K].IESPGYLTSPGYPHSYHPSEK.[C]		O14786	WiMT
	[R].IESVLSSSGK.[R]		P17900	WiMT
	[K].IETISHEDLQR.[Q]		P07225	MS2
	[K].LEVEANNAFDQYR.[D]		P47756-2	WiMT
	[K].IFNIQLEDEGIYECEAENIR.[G]	1xCarbamidomethyl [C14]	Q12860	WiMT
	[R].LEVHYHNPLVIEGR.[N]		P09172	WiMT
	[K].IEWLESHQDADIEDFK.[A]		P11021	WiMT
	[K].LEWPLTEVAEGVFETEAPGGYK.[F]		Q9HC38-2	WiMT
	[R].IFDDFGTHYFTSGSLGGVYDLLYQFSSEELK.[N]		P13671	WiMT
	[K].LFDEINPETK.[L]		Q9UK55	WiMT
	[K].LEVLNFDFQANAQLSNPK.[I]		P04114	MS2
	[K].LFQLMVEHTPDEESIDWTK.[I]		Q12907	WiMT
	[K].IGDNLRELQQR.[L]		P06727	WiMT
	[K].IGDQEFDHLPALLEFYK.[I]		P46109	WiMT
	[R].IGDTCDNNQDIDEDGHQNNLDNCPYVPNANQADHDK.[D]	2xCarbamidomethyl [C5; C23]	P07996	WiMT
	[K].LGDVYVNDAFGTAHR.[A]		P00558	WiMT
	[R].IGDLQAFQGHGAGNLAGLK.[G]		P08195	WiMT
	[R].LGEGGPDSDQAIR.[D]		Q9H0X4	WiMT
	[R].LGEHNIEVLEGNEQFINAAK.[I]		P07477; P07478	MS2
	[K].IGEHTPSALAIMENANVLAR.[Y]		P04075	MS2
	[R].LGEFWLGNDNIHALTAQGTSELR.[V]		Q15485	WiMT
	[R].LESEETMVLEAHDAQGDVPVTVTVHDFPGK.[K]	1xOxidation [M7]	P01024	MS2
	[K].IGDLHPQIVNLLK.[S]		P12111; P12111-4	WiMT
	[K].LGDDLLQCHPAVK.[F]	1xCarbamidomethyl [C8]	P04070	MS2
	[R].IFSPFADLSELSATGR.[N]		Q9UK55	WiMT
	[K].IFSQETLTK.[A]		Q9UHG3	MS2
	[R].LFYEDGSGEK.[S]		O15031	WiMT
	[K].IFYNQQNHYDGSTGK.[F]		Q15848	MS2
	[K].LGDGFEGFYK.[S]		Q6P179	WiMT
	[R].LGADMEDVCGR.[L]	1xCarbamidomethyl [C9]; 1xOxidation [M5]	P02649	MS2
	[R].IGAEVYHNLK.[N]		P06733	WiMT
	[K].LGALFQPDSFVHGNSGAGNNWAK.[G]		Q9H4B7	WiMT
	[R].IGCGSHFCEK.[L]	2xCarbamidomethyl [C3; C8]	Q6UXB8	MS2
	[R].LGADMEDVCGR.[L]	1xCarbamidomethyl [C9]	P02649	MS2
	[K].IHLISTQSAIPYALRVELEDWNGR.[T]		P02679-2; P02679	MS2
	[K].IDATSASVLASR.[F]		P13667	WiMT
	[K].LDAQASFLPK.[E]		P19827-2; P19827	MS2
	[R].KLDGICWQVR.[Q]	1xCarbamidomethyl [C6]	P07360	MS2
	[K].KIENCNYAVELGK.[NH]	1xCarbamidomethyl [C5]	P13796; P13797	WiMT
	[K].KLGQSLDCNAEVYVVPWEK.[K]	1xCarbamidomethyl [C8]	P01042-2; P01042	MS2
	[K].KLSFYYLIMAK.[G]		P01023	MS2
	[K].KLTISEQNIQR.[A]		P04114	MS2
	[K].KLVPFATELHER.[L]		P06727	MS2
	[RK].KHEAFESDLAAHQDR.[V]		P12814; O43707	WiMT
	[K].KGYTQQLAFRQPSSAFAAFVK.[R]		P01024	MS2
	[R].KGNVATEISTER.[D]		P04114	WiMT
	[K].KEAGIPEFYDYDVALIK.[L]		P00751	WiMT
	[K].KEDLVFIFWAPESAPLK.[S]		P23528	WiMT
	[K].KEDSCQLGYSAGPCMGMTSR.[Y]	2xCarbamidomethyl [C5; C14]	P02760	MS2
	[K].KEDSCQLGYSAGPCMGMTSR.[Y]	2xCarbamidomethyl [C5; C14]; 1xOxidation [M]	P02760	MS2
	[K].KEDSCQLGYSAGPCMGMTSR.[Y]	2xCarbamidomethyl [C5; C14]; 2xOxidation [M15; M17]	P02760	WiMT
	[K].KEEFHEQSFR.[V]		Q14520	WiMT
	[K].KEPAVLELEGK.[K]		Q01518	WiMT
	[K].KGDTFSCMVGHEALPLAFTQK.[T]	1xCarbamidomethyl [C7]	P01876	MS2
	[K].KGDTFSCMVGHEALPLAFTQK.[T]	1xCarbamidomethyl [C7]; 1xOxidation [M8]	P01876	MS2
	[R].KGEVLPLPEANFPSFPLPHHK.[H]		P04196	MS2
	[R].KGEWVALNPLRK.[C]		P08603	MS2
	[K].KGHIYQGSEADSVFSGFLIFPSA.[-]		P02745	WiMT
	[R].KFPSGTFEQVSQLVK.[E]		P02774	MS2
	[K].KDSGFQMNQLR.[G]	1xOxidation [M7]	P02787	MS2
	[K].KPAEDEWGK.[T]		P02792	WiMT
	[K].KPVAFSDYIHPVCLPDR.[E]	1xCarbamidomethyl [C13]	P00734	MS2
	[K].KPVAFSDYIHPVCLPDRETAASLLQAGYK.[G]	1xCarbamidomethyl [C13]	P00734	MS2
	[R].KPVEEYANCHLAR.[A]	1xCarbamidomethyl [C9]	P02787	MS2
	[K].KPWLAYPHYKPPEK.[C]		Q9UHG3	WiMT
	[R].KPYNVESYTPQTQGK.[Y]		P07358	MS2
	[K].KQELEEICHDLEAR.[V]	1xCarbamidomethyl [C8]	P35579	MS2
	[K].KQELSEAEQATR.[T]		P01024	MS2
	[K].KQINDYVEK.[G]		P01009	MS2
	[K].KQTALVELVK.[H]		P02768	MS2
	[K].KQTALVELVKHKPK.[A]		P02768	WiMT
	[K].KREEAPSLRPAPPPISGGGYR.[A]		P02675	MS2
	[K].KSASDLTWDNLK.[G]		P02787	MS2
	[K].KSCHTAVGR.[T]	1xCarbamidomethyl [C3]	P02787	MS2
	[K].KSDVGFLPPFPTLDPEEK.[C]		P43652	MS2
	[K].KPSLSVQPGPVVAPGEK.[L]		Q8N6C8	MS2
	[R].KPDVSHGEMVSGFGPIYNYK.[D]		P04003	MS2
	[R].KPDVSHGEMVSGFGPIYNYK.[D]	1xOxidation [M9]	P04003	MS2
	[R].KPDVSHGEMVSGFGPIYNYKDTIVFK.[C]		P04003	MS2
	[K].KPEDWDEEMDGEWEPPVIQNPEYK.[G]		P27797	WiMT
	[K].KPCDTSDPQCPPDGR.[Y]	2xCarbamidomethyl [C3; C10]	O95497	WiMT
	[K].KPIIGILMQK.[C]		Q92820	WiMT
	[K].KPIIGILMQK.[C]	1xOxidation [M8]	Q92820	WiMT
	[K].KPLIGTVLAMDPDAAR.[H]		P33151	WiMT
	[K].KPLIGTVLAMDPDAAR.[H]	1xOxidation [M10]	P33151	WiMT
	[K].KPLNTEGVMK.[S]		P00488	MS2
	[K].KPLNTEGVMK.[S]	1xOxidation [M9]	P00488	WiMT
	[R].KPIWLSQMSCSGR.[E]	1xCarbamidomethyl [C10]	O43866	MS2
	[K].KPGASVKVSCK.[AV]	1xCarbamidomethyl [C10]	A0A0C4DH29; P23083; P01743; P0DP01; A0A0C4DH33; A0A0C4DH31	MS2
	[K].KDSGFQMNQLR.[G]		P02787	MS2
	[K].KDPEGLFLQDNIVAEFSVDETGQMSATAK.[G]		P02753	MS2
	[K].HTLNQIDEVK.[V]		P02765	MS2
	[K].HTNYTMEHIR.[V]		P12814; O43707	WiMT
	[K].HTNYTMEHIR.[V]	1xOxidation [M6]	P12814; O43707	WiMT
	[R].HTSLGPLEAK.[R]		P07357	MS2
	[R].HTSVQTTSSGSGPFTDVR.[A]		P02751-10; P02751-1	MS2
	[K].HTTCNHVVEQLLPTSAWGTHYVVPTLASQSR.[Y]	1xCarbamidomethyl [C4]	Q9Y6R7	MS2
	[K].HVEDVPAFQALGSLNDLQFFR.[Y]		P25311	MS2
	[R].HVGDLGNVTADK.[D]		P00441	WiMT
	[R].HVLAAWALGAK.[A]		P09172	WiMT
	[R].HVIILMTDGLHNMGGDPITVIDEIRDLLYIGK.[D]		P00751	WiMT
	[R].HVIILMTDGLHNMGGDPITVIDEIRDLLYIGK.[D]	1xOxidation [M]	P00751	WiMT
	[R].HTFTLSLPR.[L]		P07333	WiMT
	[R].HTFMGVVSLGSPSGEVSHPRK.[T]	1xOxidation [M4]	P02765	MS2
	[R].HTFMGVVSLGSPSGEVSHPRK.[T]		P02765	MS2
	[R].HTFMGVVSLGSPSGEVSHPR.[K]	1xOxidation [M4]	P02765	MS2
	[R].HSIFTPETNPR.[A]		P00747	MS2
	[R].HSIPVFCHSSFYHDTDFLGEELDIVAAK.[S]	1xCarbamidomethyl [C7]	P03951	WiMT
	[R].HSITNPLAVLCEFISQSIK.[S]	1xCarbamidomethyl [C11]	P04114	MS2
	[R].HSPQEAPHVQYER.[L]		P26992	WiMT
	[K].HSQAVEELAEQLEQTK.[R]		P35579	MS2
	[R].HVIPMNPNTNDLFNAVGDGIVLCK.[M]	1xCarbamidomethyl [C23]	P13796	WiMT
	[R].HSTFIPGTNK.[W]		P08519	MS2
	[K].HSTIFENLANKADRDQYELLCLDNTR.[K]	1xCarbamidomethyl [C21]	P02787	MS2
	[K].HSWTIPEDGNSQK.[T]		Q13201	WiMT
	[R].HSYTASYDIYDLNK.[R]		P27487	WiMT
	[R].HTASAWLMSAPNSGPHNR.[L]		Q96PD5	MS2
	[R].HTASAWLMSAPNSGPHNR.[L]	1xOxidation [M8]	Q96PD5	WiMT
	[R].HTFMGVVSLGSPSGEVSHPR.[K]		P02765	MS2
	[K].HSTIFENLANK.[A]		P02787	MS2
	[K].HVSSPLASYFLSFPYAR.[L]		P80108	MS2
	[K].HVVPNEVVVQR.[L]		P06396-2; P06396	MS2
	[K].HYYIGIIETTWDYASDHGEKK.[L]		P00450	WiMT
	[R].KAADDTWEPFASGK.[T]		P02766	WiMT
	[R].KAAISGENAGLVR.[A]		P19827	WiMT
	[R].KADGSYAAWLSR.[DG]		P0C0L4; P0C0L5	MS2
	[R].KAEEEHLGILGPQLHADVGDK.[V]		P00450	MS2
	[K].KAETGDTVLK.[S]		P19320	WiMT
	[K].KALYLQYTDETFR.[T]		P00450	WiMT
	[K].HYYIGIIETTWDYASDHGEK.[K]		P00450	MS2
	[R].KAPDAGGCLHADPDLGVLCPTGCQLQEALLQQERPIR.[N]	3xCarbamidomethyl [C8; C19; C23]	P02675	MS2
	[K].KCDPTEVELDNQIVTATQSNICDEDSATETCYTYDR.[N]	3xCarbamidomethyl [C2; C22; C31]	P01591	MS2
	[R].KCSTSSLLEACTFR.[R]	2xCarbamidomethyl [C2; C11]	P02787	MS2
	[K].KCSYTEDAQCIDGTIEVPK.[C]	2xCarbamidomethyl [C2; C10]	P02749	MS2
	[R].KDDIMLDEGMLQSLMELPDQYNYGMYAK.[F]		P07357	MS2
	[K].KDGTHVVENVDATHIGK.[L]		P00488	WiMT
	[K].KDNEQHVFK.[V]		P00751	MS2
	[K].KATVVYQGER.[V]		P02749	MS2
	[K].KTDELPQLVTLPHPNLHGPEILDVPSTVQK.[T]		P02751-1	MS2
	[R].HYYIAAEEIIWNYAPSGIDIFTK.[E]		P00450	MS2
	[K].HYYESEVLAMNFQDWATASR.[Q]		P08185	MS2
	[R].HVYGELDVQIQR.[R]		P00488	MS2
	[K].HWAAAQSQCLPR.[Q]	1xCarbamidomethyl [C9]	O95479	WiMT
	[K].HWCEEGASSSSCSETYCGLYPESEPEVK.[A]	3xCarbamidomethyl [C3; C12; C17]	Q96IY4	MS2
	[K].HWPSEQDPEK.[A]		Q96NZ9	WiMT
	[K].HYDGSYSTFGER.[Y]		P01023	MS2
	[K].HYDGSYSTFGERYGR.[N]		P01023	MS2
	[R].HYEGSTVPEK.[K]		P00738	MS2
	[R].HYGGLTGLNK.[A]		P18669	WiMT
	[K].HYGYNSYSVSNSEK.[D]		P07858	WiMT
	[K].HYQINQQWER.[T]		P02751-10; P02751-1	MS2
	[K].HYTNPSQDVTVPCPVPSTPPTPSPSTPPTPSPSCCHPR.[L]	3xCarbamidomethyl [C13; C34; C35]	P01876	MS2
	[K].KTDPSGLSK.[T]		Q13740	WiMT
	[K].KVEFVLK.[Q]		O75882	MS2
	[R].IASFSQNCDIYPGK.[D]	1xCarbamidomethyl [C8]	P01042-2; P01042	MS2
	[R].LASPGFPGEYANDQER.[R]		O00187	MS2
	[R].LASPGFPGEYANDQERR.[W]		O00187	WiMT
	[R].LASVLGSEPSLDSEVTSK.[L]		Q9NY33	WiMT
	[K].LATALSLSNK.[F]		P04114	MS2
	[R].LATMMVQGQEYEAGGSVIHPLNLHMK.[R]		Q9UHG3	MS2
	[D].LATVYVDVLK.[D]		P02647	MS2
	[R].IAVAQYSDDVK.[V]		P12111; P12111-4	WiMT
	[K].LAVNMVPFPR.[L]		Q9H4B7; P07437; P68371	MS2
	[R].LAVTTHGLPCLAWASAQAK.[A]	1xCarbamidomethyl [C10]	P00734	MS2
	[K].LASDLLEWIR.[R]		P12814; O43707	WiMT
	[R].IAQYYYTFK.[S]		P05160	MS2
	[R].IAQWQSFQLEGGLK.[Q]		P01023	MS2
	[K].IAPANADFAFRFYYLIASETPGK.[N]		P29622	WiMT
	[R].LAPLAEDVR.[G]		P06727	MS2
	[R].LAPLAEDVRGNLR.[G]		P06727	MS2
	[R].LAPLAEDVRGNLRGNTEGLQK.[S]		P06727	MS2
	[R].LAPITSDPTEATAVGAVEASFK.[C]		P14618	WiMT
	[R].LAVYQAGAR.[E]		P02649	MS2
	[K].IAPQLSTEELVSLGEK.[M]		P43652	MS2
	[K].LAQAAQSSVATITR.[L]		Q9Y490	MS2
	[K].LAQDFLDSQNLSAYNTR.[L]		Q9NY33	WiMT
	[K].IAQLEEQLDNETK.[E]		P35579	MS2
	[R].IAQLRPEDLAGLAALQELDVSNLSLQALPGDLSGLFPR.[L]		Q6EMK4	WiMT
	[K].IAPANADFAFR.[F]		P29622	MS2
	[K].IAWESPQGQVSR.[Y]		P02751-1	WiMT
	[R].LAYLQPALFSGLAELR.[E]		P35858	MS2
	[R].LCNIEPDER.[C]	1xCarbamidomethyl [C2]	Q04756	MS2
	[R].LCNNPTPQFGGK.[D]	1xCarbamidomethyl [C2]	P07996	MS2
	[R].LCNTGDNSVCTTK.[T]	2xCarbamidomethyl [C2; C10]	P03952	MS2
	[R].LCQDLGPGAFR.[L]	1xCarbamidomethyl [C2]	P08697	MS2
	[K].LCTVATLRETYGEMADCCAK.[Q]	3xCarbamidomethyl [C2; C17; C18]	P02768	MS2
	[K].LCTVATLRETYGEMADCCAK.[Q]	3xCarbamidomethyl [C2; C17; C18]; 1xOxidation [M14]	P02768	MS2
	[K].LCTVATLRETYGEMADCCAKQEPER.[N]	3xCarbamidomethyl [C2; C17; C18]	P02768	WiMT
	[K].LCYVALDFEQEMATAASSSSLEK.[S]	1xCarbamidomethyl [C2]	P60709; P63261	MS2
	[K].LCMGSGLNLCEPNNKEGYYGYTGAFR.[C]	2xCarbamidomethyl [C2; C10]	P02787	MS2
	[K].LCMGSGLNLCEPNNK.[E]	2xCarbamidomethyl [C2; C10]; 1xOxidation [M3]	P02787	MS2
	[K].LCMGSGLNLCEPNNK.[E]	2xCarbamidomethyl [C2; C10]	P02787	MS2
	[R].ICMDEDGNEK.[R]	1xCarbamidomethyl [C2]	P04275	MS2
	[R].LAYQGQDTPEVLMDIGLR.[Q]		P30530	WiMT
	[K].LAYVWNNDIYVK.[I]		P27487	WiMT
	[K].ICAMEGLPQK.[H]	1xCarbamidomethyl [C2]	P43652	MS2
	[K].ICAMEGLPQK.[H]	1xCarbamidomethyl [C2]; 1xOxidation [M4]	P43652	MS2
	[K].ICDLLVANNHFAHFFAPQNLTNMNK.[N]	1xCarbamidomethyl [C2]	P19827-2; P19827	MS2
	[K].LCDNLSTK.[N]	1xCarbamidomethyl [C2]	P02774	MS2
	[R].IAYGTQGSSGYSLR.[L]		P03952	MS2
	[K].ICDQWDNLGALTQK.[R]	1xCarbamidomethyl [C2]	P12814	WiMT
	[K].ICEPGYSPTYK.[Q]	1xCarbamidomethyl [C2]	P07858	WiMT
	[R].LCFFPFVENGHSESSGQTHLEGDTVQIICNTGYR.[L]	2xCarbamidomethyl [C2; C29]	P36980; Q03591	MS2
	[K].ICFGDGDGTVNLK.[S]	1xCarbamidomethyl [C2]	Q8NCC3	WiMT
	[R].LCGTFLGGPKPPQR.[V]	1xCarbamidomethyl [C2]	P07858	WiMT
	[R].LCHCPVGYTGAFCDVDTK.[A]	3xCarbamidomethyl [C2; C4; C13]	P00748	MS2
	[K].ICLDLQAPLYK.[K]	1xCarbamidomethyl [C2]	P02776	WiMT
	[K].ICLDPDAPR.[I]	1xCarbamidomethyl [C2]	P02775	MS2
	[R].LCENIAGHLK.[D]	1xCarbamidomethyl [C2]	P04040	WiMT
	[R].LANLTQGEDQYYLR.[V]		P10909-6	WiMT
	[K].KYPVAHFIDQTLK.[A]		P05155	MS2
	[R].KYSDASDCHGEDSQAFCEK.[F]	2xCarbamidomethyl [C8; C17]	P01023	MS2
	[K].KYTHLSCDK.[V]	1xCarbamidomethyl [C7]	P05156	MS2
	[R].KYTYNYEAESSSGVPGTADSR.[S]		P04114	MS2
	[K].LAAAVSNFGYDLYR.[V]		P36955	MS2
	[K].LAAAVSNFGYDLYRVR.[S]		P36955	WiMT
	[K].LAACLEGNCAEGLGTNYR.[G]	2xCarbamidomethyl [C4; C9]	P00734	MS2
	[R].LAAIAESGVER.[Q]		P28072	WiMT
	[K].LAALNPESNTAGLDIFAK.[F]		O00299	WiMT
	[R].LAAYLMLMR.[S]		P04114	MS2
	[K].LAAYPPPEFQWYK.[D]		P35916-1	WiMT
	[K].LACDLNHAPCIQK.[A]	2xCarbamidomethyl [C3; C10]	Q6P179	WiMT
	[K].LACGAVLIHPSWVLTAAHCMDESK.[K]	2xCarbamidomethyl [C3; C19]	P04070	WiMT
	[K].KYNSQNQSNNQFVLYR.[I]		P01042-2; P01042	WiMT
	[K].KYEEEVALR.[A]		P78386; A6NCN2; P78385	WiMT
	[K].KYEDEINKR.[T]		P35908	MS2
	[K].KVEGTAFVIFGIQDGEQR.[I]		P01024	MS2
	[K].KVETNMAFSPFSIASLLTQVLLGAGENTK.[T]		P05155	MS2
	[K].KVETNMAFSPFSIASLLTQVLLGAGENTK.[T]	1xOxidation [M6]	P05155	MS2
	[K].KVFLDCCNYITELR.[R]	2xCarbamidomethyl [C6; C7]	P01024	MS2
	[K].KVFLDCCNYITELRR.[Q]	2xCarbamidomethyl [C6; C7]	P01024	MS2
	[R].KVGSQYRLEDSVTYHCSR.[G]	1xCarbamidomethyl [C16]	P00751	MS2
	[K].LACLIGVEGGHSLDNSLSILR.[T]	1xCarbamidomethyl [C3]	Q9H4A9	WiMT
	[K].KVPQVSTPTLVEVSR.[N]		P02768	MS2
	[K].KVTCTNAELVK.[G]	1xCarbamidomethyl [C4]	P01031	MS2
	[K].KWQEEMELYR.[Q]		P02647	MS2
	[K].KWQEEMELYR.[Q]	1xOxidation [M6]	P02647	MS2
	[K].KWQEEMELYRQK.[V]		P02647	MS2
	[K].KWQEEMELYRQK.[V]	1xOxidation [M6]	P02647	MS2
	[K].KYEDEINK.[R]		P35908	MS2
	[K].KVPQVSTPTLVEVSRNLGK.[V]		P02768	MS2
	[R].IADAHLDR.[V]		P04196	WiMT
	[R].LADDLYRYDVDTQMWTILK.[D]		O75882	MS2
	[K].LALDLEIATYR.[KT]		P08729; P04264; Q6KB66; P19013	MS2
	[K].LALDNGGLAR.[R]		Q14624-2; Q14624	MS2
	[K].LALDVEIATYR.[K]		Q5XKE5; P35908; P04259; P02538; O95678; P13647	WiMT
	[R].LALETALMYGAK.[K]		P00488	WiMT
	[R].LALETALMYGAK.[K]	1xOxidation [M8]	P00488	WiMT
	[R].LALGDDSPALK.[E]		P17174	WiMT
	[K].IAIANIIDEIIEK.[L]		P04114	MS2
	[R].IALGGLLFPASNLR.[L]		P04278	MS2
	[R].LAILGIHNEVSK.[I]		P12814	MS2
	[K].IAIPDFGTGAMENWGLITYR.[E]		Q07075	WiMT
	[K].LAIPQQSDFHNNR.[Y]		P07333	WiMT
	[K].LALWGEHTGQLYSK.[F]		P04114	MS2
	[K].IANDNSLNHEYLPILGLAEFR.[S]		P17174	WiMT
	[K].KTEEVECLTYGWSLTPK.[C]	1xCarbamidomethyl [C7]	P05160	MS2
	[R].LAKTYETTLEK.[C]		P02768	MS2
	[K].IADFELPTIIVPEQTIEIPSIK.[F]		P04114	MS2
	[R].LADGGATNQGR.[V]		Q08380	MS2
	[R].IADQCPSSLAIQENANALAR.[Y]	1xCarbamidomethyl [C5]	P05062	WiMT
	[R].IADVTSGLIGGEDGR.[V]		P80108	MS2
	[K].LAEGFPLPLLK.[R]		P18428	MS2
	[K].LAELEEALQK.[A]		P13647	WiMT
	[R].LAELPADALGPLQR.[A]		P35858	MS2
	[K].IAEVDCTAER.[N]	1xCarbamidomethyl [C6]	Q8NBS9	WiMT
	[K].IAEYMNHLIDIGVAGFR.[LI]		P04745; P04746; P19961	WiMT
	[K].IAFSATR.[T]		P02746	MS2
	[R].LAGAPSEDPQFPK.[V]		O00391	MS2
	[K].LAGLEEALQK.[A]		Q9NSB4	WiMT
	[K].IAELSATAQEIIK.[S]		P04114	MS2
	[K].RHLVPGAPFLLQALVR.[E]		P0C0L4; P0C0L5	MS2
	[R].IHLMAGR.[VR]		Q5T013; P02790	MS2
	[K].LQHLENELTHDIITK.[F]		P01009	MS2
	[R].IQHPFTVEEFVLPK.[F]		P20742	MS2
	[R].IQLVEEELDR.[A]		P67936-2; P09493-5; P09493-8; P67936; P06753-2; P06753; P07951-2	MS2
	[R].IQLVEEELDRAQER.[L]		P67936-2; P09493-5; P09493-8; P67936; P06753-2; P06753; P07951-2	MS2
	[K].IQMYFEWSDGTPVTFTK.[W]		P22897	WiMT
	[R].IQNILTEEPK.[V]		P27169	MS2
	[R].LQNNENNISCVER.[G]	1xCarbamidomethyl [C10]	P36980; Q03591	MS2
	[K].LQGVEETNIELLVCNYEPPGNVK.[G]	1xCarbamidomethyl [C14]	Q6UXB8	WiMT
	[K].LQGTLPVEAR.[E]		P01031	MS2
	[K].IQGQELSAYQAPSPPAHSGFHR.[Y]		Q96S96	WiMT
	[R].LQDLYSIVR.[R]		P39060	WiMT
	[FK].LQDNELR.[HA]		Q6EMK4	MS2
	[K].LQDRGPDVLTATVSGK.[L]		Q14624-2; Q14624	MS2
	[R].IQDSPVAHLVAIDSNTGEVTAQR.[S]		Q9NPG4	WiMT
	[K].LQEGGSVTMTCSSEGLPAPEIFWSK.[K]	1xCarbamidomethyl [C11]	P19320	WiMT
	[K].LQPLDFKENAEQSR.[A]		P01008	WiMT
	[R].LQEGPTSCSGR.[V]	1xCarbamidomethyl [C8]	Q86VB7	MS2
	[K].LQELHLSSNGLESLSPEFLRPVPQLR.[V]		P02750	MS2
	[Y].LQEIYNSNNQK.[I]		P02679-2; P02679	WiMT
	[K].LQETSNWLLSQQQADGSFQDLSPVIHR.[S]		P0C0L5	MS2
	[K].LQETSNWLLSQQQADGSFQDPCPVLDR.[S]	1xCarbamidomethyl [C22]	P0C0L4	MS2
	[K].LQDFSDQLSDYYEK.[F]		P04114	MS2
	[K].IQPSGGTNINEALLR.[A]		P19823	MS2
	[R].IQYYCHEPYYK.[M]	1xCarbamidomethyl [C5]	P00736	MS2
	[K].IRAYYENSPQQVFSTEFEVK.[E]		P01024	MS2
	[R].IREEGTDLEVTANR.[I]		P20742	MS2
	[K].LREQLGPVTQEFWDNLEK.[E]		P02647	MS2
	[R].IRITDNMFCAGYKPDEGK.[R]	1xCarbamidomethyl [C9]	P00734	MS2
	[R].IRPHTFTGLSGLR.[R]		P35858	MS2
	[K].LRRELDESLQVAER.[L]		P10909-6	WiMT
	[RK].LRTEGDGVYTLNDK.[K]		P00739; P00738	MS2
	[RK].LRTEGDGVYTLNDKK.[Q]		P00739; P00738	MS2
	[K].LRTEGDGVYTLNNEK.[Q]		P00738	MS2
	[K].LRVDPVNFK.[L]		P69905	MS2
	[R].IQYQLVDISQDNALRDEMR.[A]		Q9H299	WiMT
	[R].IQYQLVDISQDNALR.[D]		Q9H299	WiMT
	[R].IQVWHEEHR.[G]		P26038	WiMT
	[K].LQQLLGR.[N]		Q96BZ4	WiMT
	[R].IQQIPNVR.[R]		Q6UX71	WiMT
	[R].LQQVLHAGSGPCLPHLLSR.[L]	1xCarbamidomethyl [C12]	P08697	MS2
	[K].LQSGTHCLWTDQLLQGSEK.[G]	1xCarbamidomethyl [C7]	P01033	WiMT
	[K].LQSLFDSPDFSK.[I]		P36955	MS2
	[R].LQSIGTENTEENR.[R]		P04075	WiMT
	[K].LQSTTVMNPYMK.[L]		P04114	MS2
	[K].LQSTTVMNPYMK.[L]	2xOxidation [M7; M11]	P04114	WiMT
	[K].IQTDREEHGPFCGK.[T]	1xCarbamidomethyl [C12]	O00187	WiMT
	[R].IQTLSAIDTIK.[I]		Q3ZCW2	WiMT
	[K].LQVEPAVDTSGVQCYGPGIEGQGVFR.[E]	1xCarbamidomethyl [C14]	P21333	WiMT
	[K].LQSTTVMNPYMK.[L]	1xOxidation [M]	P04114	MS2
	[K].LQDAEIAR.[L]		P06703	WiMT
	[K].IQCVDGEWTTLPTCVEQVK.[T]	2xCarbamidomethyl [C3; C14]	Q9BXR6	MS2
	[K].LQCDLQDPIVCLADHPR.[G]	2xCarbamidomethyl [C3; C11]	Q8IZP9	WiMT
	[K].LPGIVAEGR.[D]		P01008	MS2
	[K].LPGIVAEGRDDLYVSDAFHK.[A]		P01008	MS2
	[K].IPGTCCDTCEEPECNDITAR.[L]	4xCarbamidomethyl [C5; C6; C9; C14]	P04275	MS2
	[R].LPGTYVVVLK.[E]		Q8NBP7	WiMT
	[R].IPIDDLTMVVYDPDK.[G]		Q9BYE9	WiMT
	[R].IPIEDGSGEVVLSR.[K]		P01024	MS2
	[R].LPLEYSYGEYR.[D]		P07358	MS2
	[R].IPLNDLFR.[C]		P13473	MS2
	[K].IPLVTNEECQK.[R]	1xCarbamidomethyl [C9]	P03951	MS2
	[K].IPGIFELGISSQSDR.[G]		P07358	MS2
	[R].LPGDIQVVPIGVGPNANVQELER.[I]		P04275	WiMT
	[K].LPDATPTELAK.[L]		P02774	MS2
	[K].LPDTPQGLLGEAR.[M]		P17813	WiMT
	[R].IPEAPAGPPSDFGLFLSDDDPKK.[G]		Q9Y490	WiMT
	[K].LPECEADDGCPKPPEIAHGYVEHSVR.[Y]	2xCarbamidomethyl [C4; C10]	P00738	MS2
	[K].LPECEADDGCPKPPEIAHGYVEHSVRYQCK.[N]	3xCarbamidomethyl [C4; C10; C29]	P00738	WiMT
	[K].LPECEAVCGKPK.[N]	2xCarbamidomethyl [C4; C8]	P00739; P00738	WiMT
	[R].IPLYYPNAGLTR.[N]		P08519	MS2
	[K].LPEEIQR.[D]		P33908	MS2
	[R].LPEHVTVQVVVVR.[K]		Q9HBI1-3	WiMT
	[K].IPEISIQDMTAQVTSPSGK.[T]		P21333	WiMT
	[R].LPEGSVSLIILLTDGDPTVGETNPR.[S]		Q14624-2; Q14624	MS2
	[R].IPNEGHISHFQGK.[Y]		O00533	WiMT
	[K].LPNNVLQEK.[I]		P43652	MS2
	[K].LPVVLANGQIR.[A]		Q9Y6R7	WiMT
	[K].LPVVPHAECK.[T]	1xCarbamidomethyl [C9]	P48740-2	MS2
	[R].LPYSVVRNEQVEIR.[A]		P01024	MS2
	[R].LPYTIITTPPLK.[D]		P04114	MS2
	[R].IPYYNIHPMPVHLQQR.[L]		O95479	WiMT
	[R].LQAEAFQAR.[L]		P02649	MS2
	[K].IQALQQQADEAEDR.[A]		P67936	WiMT
	[R].IQALSLCSDQQSHLEFR.[V]	1xCarbamidomethyl [C7]	P07225	MS2
	[R].IQAQDPEFSDLNSAITYR.[I]		Q9HBB8	WiMT
	[R].LQAVTDDHIR.[M]		P30043	MS2
	[R].IQCAAGYEQSEHNVCQDIDECTAGTHNCR.[A]	4xCarbamidomethyl [C3; C15; C21; C28]	Q12805	MS2
	[R].LQAILGVPWK.[D]		P01019	MS2
	[K].LRYHGDPMPCPK.[E]	1xCarbamidomethyl [C10]	P09871	WiMT
	[R].LPVANPQACENWLR.[G]	1xCarbamidomethyl [C9]	P00736	MS2
	[K].LPTDSELAPR.[S]		P49908	MS2
	[R].LPNTLKPDSYR.[V]		P15144	WiMT
	[K].LPPNVVEESAR.[A]		P01023	MS2
	[R].LPPTTTCQQQK.[E]	1xCarbamidomethyl [C7]	P00751	MS2
	[R].IPQAQPGEEWLQVDLGTPK.[T]		O60462	WiMT
	[K].LPQPVQPDPVSHCK.[E]	1xCarbamidomethyl [C13]	P05556	WiMT
	[K].LPQQANDYLNSFNWER.[Q]		P04114	MS2
	[K].IPQSQYDVVSDHVSK.[V]		P48357	WiMT
	[R].LPRPLPAVPGELTEATPNR.[Y]		P54802	WiMT
	[R].LPSGLPVSLLTLYLDNNK.[I]		P51884	MS2
	[R].LPSGSDHVMLK.[S]		P13591	WiMT
	[D].LPSLAADFVESK.[D]		P02768	MS2
	[R].LPQVSPADSGEYVCR.[V]	1xCarbamidomethyl [C14]	P98160	WiMT
	[K].IPCSQPPQIEHGTINSSR.[S]	1xCarbamidomethyl [C3]	P08603	WiMT
	[K].IRYYTYLIMNK.[G]		P01024	MS2
	[K].LSVLEEEQLPPGFPSIDMGPQLK.[V]		P10586	WiMT
	[R].ISVNNVLPVFDNLMQQK.[L]		P07339	WiMT
	[S].ISVSSEQLAQFR.[S]		P00915	WiMT
	[R].ISVYYNEATGGK.[Y]		P07437	WiMT
	[R].ISVYYNEAYGR.[K]		Q9H4B7	WiMT
	[R].LSWTVAQGPFDSFVVQYR.[D]		P22105-1	WiMT
	[K].LSYTCEGGFR.[I]	1xCarbamidomethyl [C5]	P08603	MS2
	[K].ISTPPEAYWNR.[E]		Q9NY97	WiMT
	[R].ISTGGGETEETLK.[K]		Q15063-5	WiMT
	[K].LSSWVLLMK.[Y]	1xOxidation [M8]	P01009	MS2
	[K].LSSWVLLMK.[Y]		P01009	MS2
	[R].LSQEDPDYGIR.[D]		P04040	WiMT
	[K].LSQLQTYMIQFDQYIK.[D]		P04114	MS2
	[K].LSQLQTYMIQFDQYIK.[D]	1xOxidation [M8]	P04114	MS2
	[R].LSQLSVTDVTTSSLR.[L]		P22105-1	WiMT
	[R].LSQRFPKAEFAEVSK.[L]		P02768	MS2
	[I].LTAAHTLYPK.[E]		P00736	WiMT
	[K].LSSDVCPTSDK.[S]	1xCarbamidomethyl [C6]	P11717	WiMT
	[R].LSSGLVTAALYGR.[L]		P43251	MS2
	[K].LSSPAVITDK.[V]		P00747	MS2
	[K].LSSSFIITQNMFCAGYDTK.[Q]	1xCarbamidomethyl [C13]	P00742	MS2
	[K].LSSVTAADTAVYYCAR.[-]	1xCarbamidomethyl [C14]	P06331; A0A075B6R2; P01824; P0DP08	MS2
	[K].LSSVTAVDTAVYYCAR.[-]	1xCarbamidomethyl [C14]	A0A0C4DH34	MS2
	[K].ISSDLDGHPVPK.[Q]		P29401	WiMT
	[R].ISPVEESEDVSNK.[V]		P31431	WiMT
	[K].ITAQGQYELR.[V]		P24821-4; P24821	WiMT
	[K].ITFMCNDHYILK.[G]	1xCarbamidomethyl [C5]; 1xOxidation [M4]	P20851	WiMT
	[R].ITGKWFYIASAFR.[N]		P19652	WiMT
	[R].LTGLLDLALEK.[D]		P04746	WiMT
	[K].LTGISDPVTVK.[T]		Q99784	MS2
	[K].LTGSCSYVLFQNK.[E]	1xCarbamidomethyl [C5]	P04275	MS2
	[R].LTGSSGFVTDGPGNYK.[Y]		O75882	MS2
	[K].ITGTMPPLPLEATGLALSSLR.[L]		P08571	MS2
	[K].LTHDVELNLDYER.[Y]		P02786	MS2
	[K].ITHYNYLILSK.[G]		P01031	MS2
	[K].ITFMCNDHYILK.[G]	1xCarbamidomethyl [C5]	P20851	MS2
	[K].LTFINDLCGPR.[R]	1xCarbamidomethyl [C8]	Q16610	WiMT
	[K].ITFELVYEELLK.[R]		Q14624-2; Q14624	MS2
	[R].ITCAEEGWSPTPK.[C]	1xCarbamidomethyl [C3]	P36980	MS2
	[R].ITCGGNNIGSK.[SAN]	1xCarbamidomethyl [C3]	A0A075B6K5	MS2
	[K].LTCLVTDLTTYDSVTISWTR.[Q]	1xCarbamidomethyl [C3]	P01871	MS2
	[R].ITCSGDALPK.[KQ]	1xCarbamidomethyl [C3]	A0A075B6K4	MS2
	[R].ITCTEEGWSPTPK.[C]	1xCarbamidomethyl [C3]	Q9BXR6; Q03591	MS2
	[K].LTCTLSSGHSSYAIAWHQQQPEK.[G]	1xCarbamidomethyl [C3]	A0A075B6H9	MS2
	[K].ITAIITQGCK.[S]	1xCarbamidomethyl [C9]	P12259	WiMT
	[R].LTDELAPPKPPLPEGEVPPPRPPPPEEK.[D]		P18206	WiMT
	[R].ITDNMFCAGYKPDEGK.[R]	1xCarbamidomethyl [C7]; 1xOxidation [M5]	P00734	MS2
	[K].LTDPTGWVTIDENTGSIK.[V]		Q02487	WiMT
	[R].ITDVIPSEAINELTVLVLVNTIYFK.[G]		P01008	WiMT
	[R].ITENDIQIALDDAK.[I]		P04114	MS2
	[K].ITEVALMGHLSCDTK.[E]	1xCarbamidomethyl [C12]	P04114	MS2
	[K].ITEVALMGHLSCDTK.[E]	1xCarbamidomethyl [C12]; 1xOxidation [M7]	P04114	MS2
	[R].LTEVLLGHNSWR.[C]		P40197	WiMT
	[R].ITDNMFCAGYKPDEGK.[R]	1xCarbamidomethyl [C7]	P00734	MS2
	[K].LSPIYNLVPVK.[M]		P02748	MS2
	[K].LSPLGEEMRDRAR.[A]		P02647	MS2
	[K].LSPLGEEMRDR.[A]		P02647	MS2
	[R].LSEAEFEVLK.[A]		P04275	WiMT
	[K].LSEGASYLDHTFPAEK.[M]		P12259	WiMT
	[K].ISEGLPALEFPNEK.[-]		P02748	WiMT
	[R].ISEITNIVSK.[L]		P20742	MS2
	[K].LSENTDFLAPGVSSFTDSNQQESITK.[R]		Q14515	WiMT
	[R].ISETSLPPDMYECLR.[V]	1xCarbamidomethyl [C13]	P51884	MS2
	[R].ISETSLPPDMYECLR.[V]	1xCarbamidomethyl [C13]; 1xOxidation [M10]	P51884	WiMT
	[K].LSFFCLAGYTTESGR.[Q]	1xCarbamidomethyl [C5]	P05160	MS2
	[K].LSFSYGR.[A]		P05062	WiMT
	[K].LSFVKVDSHFR.[Q]		P01023	MS2
	[R].ISCTIANR.[C]	1xCarbamidomethyl [C3]	P02751-10; P02751-1	MS2
	[F].LSALEEYTK.[K]		P02647	MS2
	[R].ISASAEELR.[Q]		P06727	MS2
	[R].ISASAEELRQR.[L]		P06727	WiMT
	[R].LSCAASGFTFDDYAMHWVR.[Q]	1xCarbamidomethyl [C3]	P0DP04	MS2
	[R].LSCAASGFTFDDYAMHWVR.[Q]	1xCarbamidomethyl [C3]; 1xOxidation [M15]	P0DP04	MS2
	[R].LSCAASGFTFSDHYMDWVR.[Q]	1xCarbamidomethyl [C3]	A0A0B4J1Y9	MS2
	[K].LSFYYLIMAK.[G]		P01023	MS2
	[K].LSCAASGFTFSGSAMHWVR.[Q]	1xCarbamidomethyl [C3]	A0A0B4J1V6	MS2
	[R].LSCAASGFTFSSYAMHWVR.[Q]	1xCarbamidomethyl [C3]	A0A075B6Q5	MS2
	[R].LSCAASGFTFSSYDMHWVR.[Q]	1xCarbamidomethyl [C3]	P01766	MS2
	[R].LSCAASGFTFSSYGMHWVR.[Q]	1xCarbamidomethyl [C3]	P01768	MS2
	[R].ISCPEGTNAYR.[S]	1xCarbamidomethyl [C3]	P05451; P48304	MS2
	[K].LSCSYSHWSAPAPQCK.[A]	2xCarbamidomethyl [C3; C15]	P04003	MS2
	[R].LSCAASGFTFSDYYMSWIR.[Q]	1xCarbamidomethyl [C3]	P01762	MS2
	[K].LSFYYLIMAK.[G]	1xOxidation [M8]	P01023	MS2
	[R].LSGALHVYSLGSD.[-]		P80108	MS2
	[K].LSGAYLVDDSDPDTSLFINVCR.[D]	1xCarbamidomethyl [C21]	P11717	WiMT
	[R].LSMDGSPTR.[I]		P03952	MS2
	[R].LSMDIDVSYK.[H]		P01031	MS2
	[R].LSMDIDVSYK.[H]	1xOxidation [M3]	P01031	WiMT
	[K].ISMLEKIYIHPR.[Y]		P00734	WiMT
	[K].LSNDMMGSYAEMK.[F]		P04114	MS2
	[K].LSNDMMGSYAEMK.[F]	1xOxidation [M]	P04114	MS2
	[K].LSITGTYDLK.[S]		P01009	MS2
	[K].LSNDMMGSYAEMK.[F]	2xOxidation [M6; M]	P04114	MS2
	[R].LSNENHGIAQR.[I]		P19823	MS2
	[K].ISNIPDEYFK.[R]		P51884	MS2
	[K].LSNNALSGLPQGVFGK.[L]		P22792	MS2
	[R].LSNRPAFMPSEGR.[M]		P12814	MS2
	[R].LSNRPAFMPSEGR.[M]	1xOxidation [M8]	P12814	WiMT
	[K].ISNSSDTVECECSENWK.[G]	2xCarbamidomethyl [C10; C12]	O75882	WiMT
	[K].LSNDMMGSYAEMK.[F]	3xOxidation [M5; M6; M12]	P04114	MS2
	[R].ISISTSGGSFR.[N]		P13647	WiMT
	[K].LSINTHPSQKPLSITVR.[T]		P01024	MS2
	[K].LSGEAYGFVAR.[I]		P04275	MS2
	[R].LSGNVLSYTFQVK.[I]		P10643	MS2
	[K].LSGSNPYTTVTPQIINSK.[W]		O43707	WiMT
	[R].ISGVGIDQPPYGIFVINQK.[T]		Q02413	WiMT
	[R].ISLQWLR.[R]		P27487	WiMT
	[R].LSHNAIASLRPR.[T]		P35858	MS2
	[K].LSLEIEQLELQR.[D]		P04003	MS2
	[K].LSLEIEQLELQRDSAR.[Q]		P04003	MS2
	[K].LSLESLTSYFSIESSTK.[G]		P04114	MS2
	[R].ISIGGGSCAISGGYGSR.[A]	1xCarbamidomethyl [C8]	P04259; P02538	WiMT
	[R].LSHPEWSSGYYWIDPNQGCTMDAIK.[V]	1xCarbamidomethyl [C19]	P08123	WiMT
	[K].LHMLELHCESK.[C]	1xCarbamidomethyl [C8]	O00533	WiMT
	[R].ILGGHLDAK.[G]		P00739; P00738	MS2
	[R].IIGGSDADIK.[N]		P09871	MS2
	[K].LLGIETPLPK.[K]		P05362	MS2
	[R].LLGLSLAGK.[D]		Q9Y5Y7	MS2
	[R].LLGMETMAWQEIR.[H]		P06681	MS2
	[R].LLGMETMAWQEIR.[H]	1xOxidation [M]	P06681	WiMT
	[R].LLGMETMAWQEIR.[H]	2xOxidation [M4; M7]	P06681	WiMT
	[K].LIGNMALLPIR.[S]		O15145	WiMT
	[R].LLGNVLVCVLAHHFGK.[E]	1xCarbamidomethyl [C8]	P68871	MS2
	[R].LLGNVLVCVLAR.[N]	1xCarbamidomethyl [C8]	P02042	MS2
	[R].LLGPGPAADFSVSVER.[A]		P54802	WiMT
	[R].IIGYTPDLDPETVDDAFAR.[A]		P08253	WiMT
	[R].LLGEVDHYQLALGK.[F]		O75636	MS2
	[K].LLGELLQDNAK.[L]		P37837	WiMT
	[R].ILGEELGFASLHDLQLLGK.[L]		P04114	MS2
	[K].LLETECPQYIR.[K]	1xCarbamidomethyl [C6]	P05109	MS2
	[K].LLETECPQYIRK.[K]	1xCarbamidomethyl [C6]	P05109	WiMT
	[K].LLETIDQLYLEYAK.[R]		P12814	WiMT
	[K].IIEVEEEQEDPYLNDR.[C]		P23142-4; P23142	MS2
	[K].IIEVEEEQEDPYLNDRCR.[G]	1xCarbamidomethyl [C17]	P23142-4; P23142	WiMT
	[R].LLFGSMTTPANWNSPLRPGEK.[Y]		Q13093	WiMT
	[R].IIFHENYNAGTYQNDIALIEMK.[K]		P05156	WiMT
	[K].ILGDMQPGDYFDLVLFGTR.[V]		P19827-2; P19827	MS2
	[K].ILGDMQPGDYFDLVLFGTR.[V]	1xOxidation [M5]	P19827-2; P19827	WiMT
	[R].LLEYDTVTR.[E]		Q9HDC9	MS2
	[K].ILLDEQAQWK.[H]		P13598	MS2
	[R].LLLQQVSLPELPGEYSMK.[V]		P01023	MS2
	[R].LLLQQVSLPELPGEYSMK.[V]	1xOxidation [M17]	P01023	MS2
	[K].LILVDYILFK.[G]		Q9UK55	WiMT
	[T].LLLVGSPTWK.[N]		P80108	WiMT
	[K].LLIYAASSLQSGVPSR.[F]		P04432; A0A0C4DH73	MS2
	[K].LLIYAASTLQSGVPSR.[F]		A0A075B6S5; A0A0C4DH67	MS2
	[R].LLIYAVLPTGDVIGDSAK.[Y]		P01023	MS2
	[K].LLIYDASNLETGVPSR.[F]		P01593	MS2
	[R].LLIYDASNR.[A]		P04433	MS2
	[R].LLIYDASNRATGIPAR.[F]		P04433	MS2
	[K].LLIYDASSLESGVPSR.[F]		A0A0B4J2D9	MS2
	[K].LLLQMDSSATAYGSTVSK.[R]	1xOxidation [M5]	P04114	MS2
	[K].LLLQMDSSATAYGSTVSK.[R]		P04114	MS2
	[R].ILLQGTPVAQMTEDAVDAERLK.[H]	1xOxidation [M11]	P01024	WiMT
	[R].ILLQGTPVAQMTEDAVDAERLK.[H]		P01024	MS2
	[R].LLLFSDGNSQGATPAAIEK.[A]		P12109	WiMT
	[R].LLLFSPSVVHLGVPLSVGVQLQDVPR.[G]		P0C0L4; P0C0L5	MS2
	[K].LLIGTVFHK.[AT]		P27169; Q15166	MS2
	[K].ILLMDLNEEDPTVLELGITGSK.[F]		P27169	MS2
	[R].LLLPGIYTVSATAPGYDPETVTVTVGPAEPTLVNFHLK.[R]		P15169	WiMT
	[K].LLLPPTESGSESSITILK.[G]		O00533	WiMT
	[R].ILLQGTPVAQMTEDAVDAER.[L]		P01024	MS2
	[R].ILLQGTPVAQMTEDAVDAER.[L]	1xOxidation [M11]	P01024	MS2
	[K].ILLMDLNEEDPTVLELGITGSK.[F]	1xOxidation [M4]	P27169	WiMT
	[R].LLEPHCFPLSLVPTEFCPSPPALK.[D]	2xCarbamidomethyl [C6; C17]	P10643	MS2
	[R].LIENGYFHPVK.[Q]		P05160	MS2
	[R].ILAGPAGDSNVVK.[L]		P04275	MS2
	[K].ILALAPTFEMNPMK.[K]	1xOxidation [M10]	Q12860	WiMT
	[K].LIALSIDSVEDHLAWSK.[D]		P30041	WiMT
	[K].LIANTLCNSR.[Q]	1xCarbamidomethyl [C7]	Q14520	MS2
	[K].LIAPVAEEEATVPNNK.[I]		P07195	MS2
	[K].LIASMSSDSLR.[H]		P00488	MS2
	[K].LIASMSSDSLR.[H]	1xOxidation [M5]	P00488	WiMT
	[R].ILASTQFEPTAAR.[M]		Q9NZ08	WiMT
	[R].LLATLCSAEVCQCAEGK.[C]	3xCarbamidomethyl [C6; C11; C13]	P0C0L4; P0C0L5	MS2
	[K].IIAATIENAQPILQIDNAR.[L]		P08779	WiMT
	[K].LLAALLEDEGGSGRPLLQAAK.[G]		Q9Y490	MS2
	[K].LKQKVSVNER.[V]		P00738	MS2
	[K].LKPVDGHCALESK.[Y]	1xCarbamidomethyl [C8]	Q14520	MS2
	[R].LHQPVVLTDHVVPLCLPER.[T]	1xCarbamidomethyl [C15]	P08709	WiMT
	[R].IHSGSFQSQVELSNDQEK.[A]		P04114	MS2
	[K].LHSLHLEGSCLGR.[I]	1xCarbamidomethyl [C10]	P35858	MS2
	[K].LHTDDELNWLDHGR.[T]		Q9Y490	WiMT
	[K].LHTEAQIQEEGTVVELTGR.[Q]		P01023	MS2
	[K].LHTEAQIQEEGTVVELTGRQSSEITR.[T]		P01023	MS2
	[R].IHWESASLLRSEETK.[E]		P01024	MS2
	[R].LKCASLQKFGER.[A]	1xCarbamidomethyl [C3]	P02768	MS2
	[R].LKCDEWSVNSVGK.[I]	1xCarbamidomethyl [C3]	P02787	MS2
	[R].LKCDEWSVNSVGKIECVSAETTEDCIAK.[I]	3xCarbamidomethyl [C3; C16; C25]	P02787	MS2
	[K].LKHELTDEELQSLFTNFANVVDK.[C]		P43652	WiMT
	[R].IHWESASLLR.[S]		P01024	MS2
	[K].IICAQQCSGR.[C]	2xCarbamidomethyl [C3; C7]	P00533	WiMT
	[K].LLDSSTVTHLFK.[I]		P60900	WiMT
	[K].LIDVISMYR.[E]		P04114	MS2
	[K].LIDVISMYR.[E]	1xOxidation [M7]	P04114	MS2
	[R].ILDVNDNIPVVENK.[V]		Q14126	WiMT
	[R].LLDSLPSDTR.[L]		P05155	MS2
	[R].ILEAHQNVAQLSLAEAQLR.[F]		Q86UX7	MS2
	[R].LLEGEDAHLSSSQFSSGSQSSR.[D]		P02533	MS2
	[R].ILEGFQPSGR.[F]		P80108	MS2
	[K].LLIYDNNK.[R]		P01701	MS2
	[R].LIDQYGTHYLQSGSLGGEYR.[V]		P10643	MS2
	[K].LLDNWDSVTSTFSKLR.[E]		P02647	MS2
	[K].LICCDILDVLDK.[H]	2xCarbamidomethyl [C3; C4]	P62258	WiMT
	[R].LLCNGDNDCGDQSDEANCR.[R]	3xCarbamidomethyl [C3; C9; C18]	P07358	MS2
	[R].LLCNGDNDCGDQSDEANCRR.[I]	3xCarbamidomethyl [C3; C9; C18]	P07358	MS2
	[K].LICQATGFSPR.[Q]	1xCarbamidomethyl [C3]	P01871	MS2
	[K].LLCQCLGFGSGHFR.[C]	2xCarbamidomethyl [C3; C5]	P02751-10; P02751-1	MS2
	[R].LIDALESHHDTWPPACPPLEPAK.[L]	1xCarbamidomethyl [C16]	O00391	WiMT
	[K].LLDPQEFTLSGTQR.[K]		P24821	WiMT
	[K].ILDDLSPR.[D]		Q14624-2; Q14624	WiMT
	[K].ILDELLQTCVDPEDCPVCEVAGR.[R]	3xCarbamidomethyl [C9; C15; C18]	P04275	MS2
	[R].LLDHRVPQTDMTFR.[H]		P04114	MS2
	[K].LLDNWDSVTSTFSK.[L]		P02647	MS2
	[R].LLIYGASIR.[A]		A0A087WSY6	MS2
	[K].LNDLEDALQQAK.[E]		P04264	MS2
	[K].LNDLEDALQQAKEDLAR.[L]		P04264	WiMT
	[K].LNDLEEALQQAK.[E]		P35908	MS2
	[K].LNDLNSVLVMPTFHVPFTDLQVPSCK.[L]	1xCarbamidomethyl [C25]	P04114	MS2
	[K].LNDLNSVLVMPTFHVPFTDLQVPSCK.[L]	1xCarbamidomethyl [C25]; 1xOxidation [M10]	P04114	WiMT
	[K].LNECVDHTPK.[L]	1xCarbamidomethyl [C4]	P78417	WiMT
	[R].INENTGSVSVTR.[T]		P55290	MS2
	[K].LNFAVASR.[K]		P30101	WiMT
	[K].LNFNGEGEPEELMVDNWRPAQPLK.[N]		P00918	WiMT
	[R].LNFSHGTHEYHAETIK.[N]		P14618-2; P14618	WiMT
	[R].LNGEIQALELPQK.[A]		P04114	MS2
	[K].LNGGNLVVINPNR.[N]		Q9P232	WiMT
	[K].INHCRFDEFFSEGCAPGSK.[K]	2xCarbamidomethyl [C4; C14]	P02787	MS2
	[R].LNCEDIDECR.[T]	2xCarbamidomethyl [C3; C9]	Q12805	WiMT
	[R].LNAIYQNNLTK.[S]		P00390	WiMT
	[R].IMINFNPHFDLEDR.[D]		O14786	WiMT
	[K].LMIYEVSNRPSGVPDR.[F]		A0A075B6J9	MS2
	[K].LMIYEVSNRPSGVSNR.[F]		P01704	MS2
	[K].IMNGEADAMSLDGGFVYIAGK.[C]		P02787	MS2
	[K].IMNGEADAMSLDGGFVYIAGK.[C]	1xOxidation [M]	P02787	MS2
	[K].IMNGEADAMSLDGGFVYIAGK.[C]	2xOxidation [M2; M9]	P02787	WiMT
	[K].INHGILYDEEK.[Y]		P36980; Q03591	MS2
	[R].LMQCLPNPEDVK.[M]	1xCarbamidomethyl [C4]	P04003	MS2
	[R].IMQSSQSMSK.[L]		O75882	MS2
	[R].IMQSSQSMSK.[L]	1xOxidation [M]	O75882	MS2
	[R].IMQSSQSMSK.[L]	2xOxidation [M2; M8]	O75882	WiMT
	[R].LMTQDCLQQSR.[K]	1xCarbamidomethyl [C6]	P08709	WiMT
	[R].LMVELHNLYR.[A]		Q6UXB8	WiMT
	[R].LMVELHNLYR.[A]	1xOxidation [M2]	Q6UXB8	WiMT
	[R].LMQCLPNPEDVK.[M]	1xCarbamidomethyl [C4]; 1xOxidation [M2]	P04003	MS2
	[K].LMLLLEVISGER.[L]		P12814; O43707	WiMT
	[K].LNHQLEGLTFQMK.[K]		P06727	MS2
	[K].LNVAEVTQSEIGQK.[Q]		Q9HBI1-3	WiMT
	[R].LNVEVDAAPTVDLNR.[V]		Q15323	WiMT
	[K].INVGGGLSGDHCK.[K]	1xCarbamidomethyl [C12]	P07357	MS2
	[R].LNWEAPPGAFDSFLLR.[F]		P22105-1	WiMT
	[K].INYTEGR.[A]		P06744	WiMT
	[R].IPACIAGER.[R]	1xCarbamidomethyl [C4]	P59665	WiMT
	[R].IPADATALDVSHNLLR.[A]		P98161	WiMT
	[R].LPASHATWMGK.[I]		P12955	WiMT
	[R].LPASHATWMGK.[I]	1xOxidation [M9]	P12955	WiMT
	[R].LNTFGDEVFNDPK.[V]		P11047	WiMT
	[R].LNTDIAGLASAIDMSTNYNSDSLHFSNVFR.[S]	1xOxidation [M14]	P04114	MS2
	[R].LNTDIAGLASAIDMSTNYNSDSLHFSNVFR.[S]		P04114	MS2
	[R].LNILNAK.[F]		P05546	MS2
	[K].INIPGTPETDIDSSCSR.[Y]	1xCarbamidomethyl [C15]	Q8IZF2	WiMT
	[K].YYYAVYDMVVR.[G]		P07942	WiMT
	[K].LNMGITDLQGLR.[L]		P0C0L4; P0C0L5	MS2
	[K].LNMGITDLQGLR.[L]	1xOxidation [M3]	P0C0L4; P0C0L5	MS2
	[K].LNNGEITQHR.[K]		P04003	MS2
	[K].LNHQLEGLTFQMK.[K]	1xOxidation [M12]	P06727	MS2
	[K].LNNGEITQHRK.[S]		P04003	MS2
	[K].INNQLTLDSNTK.[Y]		P04114	MS2
	[R].INPDGSQSVVEVPYAR.[S]		Q9Y2B0	WiMT
	[K].LNPENLELEQTWETNIR.[K]		Q99972	WiMT
	[R].LNPGALLPVLTDPALNDLYVISTFK.[L]		P35443	WiMT
	[K].LNQALLDLHALGSAR.[T]		P02792	WiMT
	[R].INSDGSSTSYADSVK.[G]		A0A0B4J1X5	WiMT
	[K].LNSEGMEEAR.[N]		P07738	WiMT
	[K].LMIEMDGTENK.[S]		P06733	WiMT
	[R].IMGITLVSK.[K]	1xOxidation [M2]	Q9Y5Y7	WiMT
	[K].LLNYNPEDPPGSEVLR.[I]		Q15166	WiMT
	[K].LLPAFHTPSGIPWALLNMK.[SR]		P33908	WiMT
	[K].IIPFNRLTIGEGQQHHLGGAK.[Q]		P02679-2; P02679	MS2
	[R].IIPGFMCQGGDFTR.[PH]	1xCarbamidomethyl [C7]	P62937	MS2
	[R].LLPHANEVSQK.[I]		P06727	MS2
	[R].IIPHHNYNAAINK.[Y]		P00740	MS2
	[R].LLPVYELSGEHHDEEWSVK.[T]		Q9NZK5	WiMT
	[K].LLQCVDHSTHPDCALK.[S]	2xCarbamidomethyl [C4; C13]	Q10588	WiMT
	[R].ILQDDLTCR.[A]	1xCarbamidomethyl [C8]	Q07954	WiMT
	[K].LLQDEFPGIPSPLDAAVECHR.[G]	1xCarbamidomethyl [C19]	P02790	MS2
	[K].LLQDEFPGIPSPLDAAVECHRGECQAEGVLFFQGDR.[E]	2xCarbamidomethyl [C19; C24]	P02790	WiMT
	[K].LLQDFFNGK.[E]		P11142	WiMT
	[K].LIQEAPKPECEK.[A]	1xCarbamidomethyl [C10]	P20851	MS2
	[R].LLQEGQALEYVCPSGFYPYPVQTR.[T]	1xCarbamidomethyl [C12]	P00751	MS2
	[R].LLNNWDVCADMVGTFTDTEDPAK.[F]	1xCarbamidomethyl [C8]; 1xOxidation [M11]	P02753	WiMT
	[R].LLNNWDVCADMVGTFTDTEDPAK.[F]	1xCarbamidomethyl [C8]	P02753	MS2
	[R].ILNNGHAFNVEFDDSQDK.[A]		P00918	WiMT
	[R].LLNIQTYCAGPAYLK.[G]	1xCarbamidomethyl [C8]	P22792	MS2
	[K].LLIYGNSNRPSGVPDR.[F]		P01703	MS2
	[K].LLIYSASNLQSGVPSR.[F]		P0DSN7	MS2
	[K].LLIYSNNQRPSGVPDR.[F]		P01699; P01700	MS2
	[K].LLIYSNNQRPSGVPDRFSGSK.[S]		P01699; P01700	WiMT
	[K].LLIYWASTR.[E]		P06312	MS2
	[K].LIMVQHWPETVCEK.[I]	1xCarbamidomethyl [C12]	O00584	WiMT
	[K].LLNDEDPVVVTK.[A]		P14923	WiMT
	[R].ILNEDGSPNLDFKPEDQPHFDIK.[D]		Q9UMX5	WiMT
	[R].IINEPTAAAIAYGLDK.[KRG]		P11142; P11021	WiMT
	[R].LLNLDGTCADSYSFVFSR.[D]	1xCarbamidomethyl [C8]	P02753	MS2
	[R].LLNLDGTCADSYSFVFSRDPNGLPPEAQK.[I]	1xCarbamidomethyl [C8]	P02753	WiMT
	[K].ILNIFGVIK.[G]		P02786	MS2
	[K].ILNDDTALK.[E]		P54727	WiMT
	[K].LIRDVWGIEGPIDAAFTR.[I]		P04004	MS2
	[K].LIVAMSSWLQK.[A]		P04114	MS2
	[K].LIVAMSSWLQK.[A]	1xOxidation [M5]	P04114	WiMT
	[R].LIVHNGYCDGR.[S]	1xCarbamidomethyl [C8]	P02753	MS2
	[LHRS].LIYAASSLQSGVPSR.[F]		P04432; A0A0C4DH73; P01599; P01601	WiMT
	[R].IIYGGSVTGATCK.[E]	1xCarbamidomethyl [C12]	P60174-1	WiMT
	[K].IMADSGPIYDK.[T]		P07996	MS2
	[R].LLVVYPWTQR.[F]		P02042; P69891; P68871	MS2
	[R].LLIYGASSR.[A]		P01619	MS2
	[R].ILTSDVFQDCNK.[L]	1xCarbamidomethyl [C10]	P04275	MS2
	[K].IISDYHQQFR.[Y]		P04114	MS2
	[K].ILSGDPYCEK.[D]	1xCarbamidomethyl [C8]	P43251	MS2
	[K].LLSGGNTLHLVSTTK.[T]		P04114	MS2
	[R].LLSGPYFWSLPSR.[F]		P98160	WiMT
	[K].LLSHCLLVTLAAHLPAEFTPAVHASLDK.[F]	1xCarbamidomethyl [C5]	P69905	MS2
	[R].LLSLGAGEFK.[S]		P12259	WiMT
	[H].LISTQSAIPYALR.[V]		P02679-2; P02679	MS2
	[K].LISVDTEHSNIYLQNGPDR.[I]		P00450	MS2
	[K].LISVDTEHSNIYLQNGPDRIGR.[L]		P00450	WiMT
	[R].LITLEEEMTK.[Y]		P07237	WiMT
	[R].LISQIVSSITASLR.[F]		P68363; Q9H853; P68366	MS2
	[R].HSHESQDLR.[V]		P04196	MS2
	[K].RHLVPGAPFLLQALVREMSGSPASGIPVK.[V]		P0C0L4; P0C0L5	WiMT
	[R].RHPDYSVVLLLR.[L]		P02768	MS2
	[K].VMYTQYEDESFTK.[H]	1xOxidation [M2]	P12259	WiMT
	[K].VNDDIIVNWVNETLR.[E]		P13796	WiMT
	[R].VNDFHCECR.[A]	2xCarbamidomethyl [C6; C8]	P46531	WiMT
	[S].VNDLYIQK.[Q]		P05546	WiMT
	[R].VNEPSILEMSR.[G]		O14791	MS2
	[R].VNGSPVDNHPFAGDVVFPR.[E]		O00533	WiMT
	[R].VNHVTLSQPK.[I]		P61769	MS2
	[K].VNKDDEEFIESNK.[M]		P00450	MS2
	[K].VNIPLVTNEECQK.[R]	1xCarbamidomethyl [C11]	P03952	MS2
	[K].VMYTQYEDESFTK.[H]		P12259	WiMT
	[K].VIVIPVGIGPHANLK.[Q]		P04275	MS2
	[K].VLVQNAAGSQEK.[L]		Q9Y490	MS2
	[K].VLYDAEISQIHQSVTDTNVILSMDNSR.[N]		P35908	MS2
	[R].VMLVNSMNTVK.[E]		P18206	WiMT
	[R].VMPICLPSKDYAEVGR.[V]	1xCarbamidomethyl [C5]	P00738	MS2
	[R].VMPICLPSKDYAEVGRVGYVSGWGR.[N]	1xCarbamidomethyl [C5]	P00738	MS2
	[R].VMTPAVYAPYDVK.[V]		O00533	WiMT
	[R].VMTPAVYAPYDVK.[V]	1xOxidation [M2]	O00533	WiMT
	[K].VLVDHFGYTK.[D]		P04114	MS2
	[R].VNQNLVYESGSLNFSK.[L]		P04114	MS2
	[R].VPFDAATLHTSTAMAAQHGMDDDGTGQK.[Q]		P06396-2; P06396	MS2
	[R].VPFDAATLHTSTAMAAQHGMDDDGTGQK.[Q]	1xOxidation [M]	P06396-2; P06396	MS2
	[R].VPFDAATLHTSTAMAAQHGMDDDGTGQK.[Q]	2xOxidation [M14; M20]	P06396-2; P06396	WiMT
	[R].VPGDQTSTIIQELEPGVEYFIR.[V]		P24821-4; P24821	WiMT
	[R].VPGHEDGVTISGLEPDHK.[Y]		P22105-1	WiMT
	[K].VPGLYYFTYHASSR.[G]		P02746	MS2
	[K].VPGLYYFVYHASHTANLCVLLYRSGVK.[V]	1xCarbamidomethyl [C18]	P02747	WiMT
	[R].VPGTSTSATLTGLTR.[G]		P02751-10; P02751-1	MS2
	[K].VPHDLDMLLR.[A]		P55058	MS2
	[K].VPLALFALNR.[Q]		P12955	MS2
	[K].VPLDSSPATCHNNIMK.[Q]	1xCarbamidomethyl [C10]	P04275	MS2
	[K].VPLLLSEPINIIDALEMR.[D]		P04114	MS2
	[K].VPLLLSEPINIIDALEMR.[D]	1xOxidation [M17]	P04114	MS2
	[R].VPENTMHAMQQK.[L]		P12814	WiMT
	[R].VPEARPNSMVVEHPEFLK.[A]	1xOxidation [M9]	P06396	WiMT
	[R].VPEARPNSMVVEHPEFLK.[A]		P06396	MS2
	[K].VPDESEVVVER.[D]		Q08188	WiMT
	[K].VNSQSLSPYLFR.[A]		Q13103	MS2
	[K].VNVDAVGGEALGR.[L]		P02042	MS2
	[K].VNVDEVGGEALGR.[L]		P68871	MS2
	[K].VNVEDAGGETLGR.[L]		P69891	MS2
	[R].VNVGAGSHPNK.[V]		P21333	MS2
	[K].VNWEEEAASGLLTSLK.[D]		P04114	MS2
	[R].VNYEEFAR.[M]		Q9NZT1	WiMT
	[R].VPAAYAASLCGLCGNYNQDPADDLK.[A]	2xCarbamidomethyl [C10; C13]	Q9Y6R7	WiMT
	[R].VPANLENVGFEVQTAEDDLK.[T]		P13671	MS2
	[R].VPAPPSPQPATYTCVVSHEDSR.[T]	1xCarbamidomethyl [C14]	P01880	MS2
	[K].VPDEHMIPIENLMNPR.[A]		Q07954	WiMT
	[K].VNWIGCQGSEPHFR.[G]	1xCarbamidomethyl [C6]	O00391	MS2
	[K].VPLQQNFQDNQFQGK.[W]		P80188	WiMT
	[R].VLTQIGTSIQDFIEAEDDLSSFR.[A]		Q15063-5	WiMT
	[R].VLTPPMGTVMDVLK.[G]		Q15582	MS2
	[K].VLLDGVQNPR.[A]		P01024	MS2
	[K].VLLDGVQNPRAEDLVGK.[S]		P01024	MS2
	[R].VLLDQLGTTISFER.[I]		P04114	MS2
	[R].VLLEAGEGLVTITPTTGSDGRPDAR.[V]		Q9NY33	WiMT
	[R].VLLESIGSHEELTQDSR.[L]		Q12913	WiMT
	[K].VILGAHQEVNLEPHVQEIEVSR.[L]		P00747	MS2
	[K].VILPQTSDAYQVSVAK.[S]		Q86SQ4	WiMT
	[R].VIISAPSADAPMFVMGVNHEK.[Y]		P04406	WiMT
	[K].VIMDYESLEK.[A]		P00491	WiMT
	[K].VLMSVLNDNSR.[D]		P06681	WiMT
	[K].VLMSVLNDNSR.[D]	1xOxidation [M3]	P06681	WiMT
	[K].VLLAPLGDDFR.[Y]		Q16706	WiMT
	[K].VLHGDLIDFVCK.[Q]	1xCarbamidomethyl [C11]	P05160	MS2
	[K].VLEPMPSTAEISTSGAVLK.[I]		Q12860	WiMT
	[K].VLEYLNDLK.[Q]		Q9UNW1	WiMT
	[K].VLGAFSDGLAHLDNLK.[G]		P02042; P68871	MS2
	[K].VLGEAMTGISQNAK.[N]		Q9Y490	WiMT
	[R].VIGNMGQTMEQLTPELK.[S]		P04114	MS2
	[K].VLMSVLNDNSRDMTEVISSLENANYK.[D]		P06681	WiMT
	[R].VIGNMGQTMEQLTPELK.[S]	1xOxidation [M]	P04114	MS2
	[K].VLGPPTPLILR.[N]		Q8IWV2	WiMT
	[R].VIGSGCNLDSAR.[F]	1xCarbamidomethyl [C6]	P07195; P00338	MS2
	[K].VLHFDQVTENTTEK.[A]		P48594	WiMT
	[K].VLHFDQVTENTTGK.[A]		P29508	WiMT
	[R].VIGNMGQTMEQLTPELK.[S]	2xOxidation [M5; M9]	P04114	WiMT
	[R].VINLPLDSMAAPWETGDTFPDVVAIAPDVR.[A]		Q96PD5	MS2
	[K].VLSALQAVQGLLVAQGR.[A]		P01019	MS2
	[R].VISGVLQLGNIVFK.[K]		P35579	MS2
	[K].VLSIAQAHSPAFSCEQVR.[A]	1xCarbamidomethyl [C14]	P08571	MS2
	[K].VLSLAQEQVGGSPEK.[L]		P0C0L4; P0C0L5	MS2
	[K].VISTLEEPTPQCPTSQGR.[S]	1xCarbamidomethyl [C12]	P09172	MS2
	[R].VLSTLNVLVTPELLETGVECTASNDLGK.[N]	1xCarbamidomethyl [C20]	P43121	WiMT
	[K].VISTITNNIQQIIEIEDTFETLR.[A]		Q15582	WiMT
	[K].VITENVIVDCSHIQFLEMYGEMLAVSK.[L]	1xCarbamidomethyl [C10]	P80108	WiMT
	[K].VITEPIPVSDLR.[V]		Q12913	WiMT
	[R].VLTGNPRLDLQEINNWVQAQMK.[G]		P36955	WiMT
	[R].VLTHSELAPLR.[A]		Q14515	WiMT
	[R].VLTPDAFVCR.[T]	1xCarbamidomethyl [C9]	P03952	MS2
	[R].VLRENADSLQASLRPHADELK.[A]		P06727	MS2
	[K].VIQYLAYVASSHK.[S]		P35579	MS2
	[R].VLQLTSWDEDAWASK.[DV]		P18206	WiMT
	[K].VLNQELR.[A]		P05090	MS2
	[R].VLNTEANVVR.[K]		O00391	MS2
	[K].VLNYVDWIK.[K]		P00736	MS2
	[K].VIPACLPSPNYVVADR.[T]	1xCarbamidomethyl [C5]	P00747	MS2
	[K].VIPACLPSPNYVVADRTECFITGWGETQGTFGAGLLK.[E]	2xCarbamidomethyl [C5; C19]	P00747	MS2
	[R].VLPEFDTPGHTLSWGK.[G]		P07686	WiMT
	[K].VIPGPPALTLVPAELVR.[I]		P07333	WiMT
	[K].VLQAGSSRPWQEVLK.[D]		P12821	WiMT
	[K].VLQIEKEGAIHREELVYELNPLDHR.[G]		P0C0L4; P0C0L5	WiMT
	[R].VPMMLQDQEHHWYLHDR.[Y]		P29622	MS2
	[K].VPPEWKALTDMPQMR.[M]		P02671	WiMT
	[R].VSSSPAPAVSWLYHNEEVTTISDNR.[F]		O15394	WiMT
	[K].VSSVEECQK.[R]	1xCarbamidomethyl [C7]	P03952	MS2
	[R].VSVADHSLHLSK.[A]		Q13162	WiMT
	[R].VSVFVDWIHK.[V]		Q2TV78; P26927	MS2
	[K].VSVFVPPR.[D]		P01871	MS2
	[K].VSVFVPPRDGFFGNPR.[K]		P01871	MS2
	[K].VSVFVPPRDGFFGNPRK.[S]		P01871	WiMT
	[R].VSVHPDYR.[Q]		P00736	MS2
	[I].VSSAMEPDREYHFGQAVR.[F]		P08603	MS2
	[R].VSQYIEWLQK.[L]		P08709	WiMT
	[R].VSQTTWDSGFCAVNPK.[F]	1xCarbamidomethyl [C11]	P31146	WiMT
	[R].VSLDVNHFAPDELTVK.[T]		P04792	MS2
	[R].VSIQEPQDYTEPVELLAVR.[I]		Q8WZ75	WiMT
	[K].VSITSITVENVFVK.[Y]		P01031	MS2
	[K].VSNGAGTMSVSLVADENPFAQGALK.[S]		P06396-2; P06396	MS2
	[K].VSNKGLPAPIEK.[T]		P01859	MS2
	[K].VSVLCQENYLIQEGEEITCK.[D]	2xCarbamidomethyl [C5; C19]	P08603	MS2
	[K].VSNQTLSLFFTVLQDVPVR.[D]		P01023	MS2
	[R].VSPPSCPPHR.[L]	1xCarbamidomethyl [C6]	P04275	WiMT
	[Y].VSQFEGSALGK.[Q]		P02647	WiMT
	[R].VSLDEDNDR.[L]		Q6UXD5	WiMT
	[R].VTFHNKGAYPLSIEPIGVR.[F]		P00450	WiMT
	[K].VTFQLTYEEVLK.[R]		P19827-2; P19827	MS2
	[R].VTGDHVDLTTCPLAAGAQQEK.[L]	1xCarbamidomethyl [C11]	Q15828	MS2
	[K].VTGEGCVYLQTSLK.[Y]	1xCarbamidomethyl [C6]	P01023	MS2
	[R].VTGESHIGGVLLK.[I]		Q86UX7	WiMT
	[R].VTGVVLFR.[Q]		P08294	WiMT
	[K].VTHAVVTVPAYFNDAQR.[Q]		P11021	MS2
	[R].VTHEGSTVEK.[T]		A0M8Q6	MS2
	[R].VTKCCTESLVNR.[R]	2xCarbamidomethyl [C4; C5]	P02768	MS2
	[K].VTLAVSDLQK.[S]		Q9HC38-2	WiMT
	[K].VTIGLLFWDGR.[G]		Q14624-2; Q14624	MS2
	[K].VTFELTYEELLK.[R]		Q06033	MS2
	[K].VTFDPTSSYTLEDLKPDTLYR.[F]		P10586	WiMT
	[R].VTEPISAESGEQVER.[V]		O14791	MS2
	[K].VTEIWQEVMQR.[R]		P08294	WiMT
	[R].VSWYQQPPGTAPK.[L]		A0A075B6J9	MS2
	[K].VSYGFLSPPQLNK.[N]		P22413	WiMT
	[K].VSYQLADGGEPQSVQVDGQAR.[T]		P22105-1	WiMT
	[R].VTAAPQSVCALR.[A]	1xCarbamidomethyl [C9]	P01023	MS2
	[K].VTADGEQTGQDAER.[T]		P24043	WiMT
	[R].VSVQLEASPAFLAVPVEK.[E]		P01023	MS2
	[R].VTASDPLDTLGSEGALSPGGVASLLR.[L]		P0C0L4; P0C0L5	MS2
	[R].VTASDPLDTLGSEGALSPGGVASLLRLPR.[G]		P0C0L4; P0C0L5	WiMT
	[K].VTASSPVAVLSGHSCAQK.[H]	1xCarbamidomethyl [C15]	Q9Y6R7	WiMT
	[K].VTCTNAELVK.[G]	1xCarbamidomethyl [C3]	P01031	WiMT
	[R].VTDATETTITISWR.[T]		P02751-10; P02751-1	MS2
	[K].VTAQGPGLEPSGNIANK.[T]		P21333	MS2
	[R].VSLATVDK.[T]		P49908	WiMT
	[R].VSLAGACGVGGYGSR.[S]	1xCarbamidomethyl [C7]	P13647	WiMT
	[K].VQALEEANNDLENK.[I]		P35527	MS2
	[R].VQEAHLTEDQIFYFPK.[Y]		P07360	MS2
	[R].VQEGYTCDCFDGYHLDTAK.[M]	2xCarbamidomethyl [C7; C9]	Q14766	WiMT
	[K].VQFELHYQEVK.[W]		P19823	MS2
	[K].VQFELHYQEVKWR.[K]		P19823	WiMT
	[R].VQGNDHSATR.[E]		Q14624-2; Q14624	WiMT
	[K].VQHIQLLQK.[N]		P02671	MS2
	[K].VQLSNDFDEYIMAIEQTIK.[S]		P01024	MS2
	[K].VQLSNDFDEYIMAIEQTIK.[S]	1xOxidation [M12]	P01024	MS2
	[R].VQLSPDLLATLPEPASPGR.[Q]		Q04756	MS2
	[R].VQLYDLGLQIHK.[D]		P18428	MS2
	[K].VQNECPGITR.[V]	1xCarbamidomethyl [C5]	P15169	MS2
	[K].VQNHCQEPYYQAAAAGALTCATPGTWK.[D]	2xCarbamidomethyl [C5; C20]	Q9NZP8	WiMT
	[K].VQAAVGTSAAPVPSDNH.[-]		P02649	MS2
	[R].VPVLMESR.[S]		O00391	WiMT
	[K].VPVHDVTDASK.[V]		P21333	MS2
	[K].VPVDPATYGQFYGGDSYIILYNYR.[H]		P06396-2; P06396	MS2
	[K].VPQVSTPTLVEVSR.[N]		P02768	MS2
[truncated: 6,914 more rows]

## Sheet: Table S6
	Table S6: Peptide identification in plasma samples from the 10 MM patients.
	Annotated Sequence	Modifications	Master Protein Accessions	Identification
	[R].AAAATGTIFTFR.[S]		P05154	MS2
	[K].MQQVENGLSEK.[T]		P05154	MS2
	[K].MREIEEVLTPEMLMR.[W]		P29622	MS2
	[K].MREWFSETFQK.[V]		P02654	MS2
	[K].MREWFSETFQK.[V]	1xOxidation [M1]	P02654	MS2
	[K].MRPSTDTITVMVENSHGLR.[V]		P0C0L4; P0C0L5	MS2
	[K].MRPSTDTITVMVENSHGLR.[V]	1xOxidation [M]	P0C0L4; P0C0L5	MS2
	[K].MRPSTDTITVMVENSHGLR.[V]	2xOxidation [M1; M11]	P0C0L4; P0C0L5	WiMT
	[K].MSAEINEIIR.[V]		P18206	WiMT
	[K].MSAEINEIIR.[V]	1xOxidation [M1]	P18206	WiMT
	[R].MSAQTHGLLGQFFQPFDFK.[V]		Q06033	MS2
	[K].MSAVEGICTSESPVIDHQGTK.[S]	1xCarbamidomethyl [C8]	P01031	MS2
	[K].MSAVEGICTSESPVIDHQGTK.[S]	1xCarbamidomethyl [C8]; 1xOxidation [M1]	P01031	MS2
	[-].MSDKPDMAEIEK.[F]	1xMet-loss+Acetyl [N-Term]	P62328	MS2
	[-].MSDKPDMAEIEK.[F]	1xOxidation [M7]; 1xMet-loss+Acetyl [N-Term]	P62328	MS2
	[K].MQQNIQELEEQLEEEESAR.[Q]		P35579	MS2
	[-].MSDKPDMAEIEKFDK.[S]	1xMet-loss+Acetyl [N-Term]	P62328	WiMT
	[R].MQNDTAENETTEK.[E]		Q05682-4	WiMT
	[K].MQILEGLGLNLQK.[S]		P05154	MS2
	[K].MPFINIPVLDIK.[K]		O95980	WiMT
	[R].MPMGLSTGIISDSQIK.[A]		P12259	MS2
	[K].MPPYDEQTQAFIDAAQEAR.[N]		P14314	WiMT
	[-].MPPYTVVYFPVR.[G]	1xMet-loss [N-Term]	P09211	MS2
	[R].MPVAPYWTSPEK.[M]		P11362	WiMT
	[K].MPYECGPSLDVCAQDER.[S]	2xCarbamidomethyl [C5; C12]	P10643	MS2
	[K].MPYECGPSLDVCAQDER.[S]	2xCarbamidomethyl [C5; C12]; 1xOxidation [M1]	P10643	WiMT
	[K].MPYECGPSLDVCAQDERSK.[R]	2xCarbamidomethyl [C5; C12]	P10643	WiMT
	[K].MSENIPNEVYALGAFDGLHTVEGR.[Y]		O95497	WiMT
	[K].MSENIPNEVYALGAFDGLHTVEGR.[Y]	1xOxidation [M1]	O95497	WiMT
	[-].MSFIPVAEDSDFPIHNLPYGVFSTR.[G]	1xMet-loss+Acetyl [N-Term]	P16930	WiMT
	[R].MTVSTLVLGEGATEAEISMTSTR.[W]	2xOxidation [M1; M19]	P02760	WiMT
	[K].MTVTDQVNCPK.[L]	1xCarbamidomethyl [C9]	P05090	MS2
	[K].MTVTDQVNCPK.[L]	1xCarbamidomethyl [C9]; 1xOxidation [M1]	P05090	MS2
	[R].MVAAATNNLCEAANAAVQGHASQEK.[L]	1xCarbamidomethyl [C10]	Q9Y490	MS2
	[K].MVCGPSGSQLVLLK.[L]	1xCarbamidomethyl [C3]	P26927	MS2
	[R].MVETTAYALLTSLNLK.[D]		P01031	MS2
	[R].MVETTAYALLTSLNLK.[D]	1xOxidation [M1]	P01031	WiMT
	[K].MVGGIAQIIAAQEEMLR.[K]		Q9Y490	WiMT
	[K].MVLLEQLFLDHNALR.[G]		P40197	WiMT
	[R].MVINVHEAGR.[N]		P08581	WiMT
	[-].MVNPTVFFDIAVDGEPLGR.[V]	1xMet-loss+Acetyl [N-Term]	P62937	WiMT
	[R].MTVSTLVLGEGATEAEISMTSTR.[W]	1xOxidation [M]	P02760	WiMT
	[R].MTVSTLVLGEGATEAEISMTSTR.[W]		P02760	MS2
	[K].MTSNFPVDLSDYPK.[S]	1xOxidation [M1]	P04114	MS2
	[K].MTSNFPVDLSDYPK.[S]		P04114	MS2
	[K].MSGDLLELALK.[L]		Q8NBP7	WiMT
	[R].MSGECAPNVSVSVSTSHTTISGGGSR.[G]	1xCarbamidomethyl [C5]	P04264	MS2
	[R].MSGECAPNVSVSVSTSHTTISGGGSR.[G]	1xCarbamidomethyl [C5]; 1xOxidation [M1]	P04264	MS2
	[R].MSLSLPLINR.[A]		O95479	WiMT
	[-].MSQDGASQFQEVIR.[Q]	1xMet-loss+Acetyl [N-Term]	Q16851-2	WiMT
	[K].MSSINADFAFNLYR.[R]		P05543	MS2
	[K].MSSINADFAFNLYR.[R]	1xOxidation [M1]	P05543	WiMT
	[R].MSVEADINGLR.[R]		P02533	WiMT
	[K].MTGLVDEAIDTK.[S]		P18206	WiMT
	[K].MTGLVDEAIDTK.[S]	1xOxidation [M1]	P18206	WiMT
	[R].MTQSPSSFSASTGDR.[V]		A0A0C4DH67	MS2
	[R].MVSDINNAWGCLEQVEK.[G]	1xCarbamidomethyl [C11]	P12814	MS2
	[R].MPCAEDYLSVVLNQLCVLHEKTPVSDRVTK.[C]	2xCarbamidomethyl [C3; C16]; 1xOxidation [M1]	P02768	MS2
	[R].MPCAEDYLSVVLNQLCVLHEKTPVSDR.[V]	2xCarbamidomethyl [C3; C16]	P02768	MS2
	[K].MGPTVSPICLPGTSSDYNLMDGDLGLISGWGR.[T]	1xCarbamidomethyl [C9]	P09871	MS2
	[K].MGPTVSPICLPGTSSDYNLMDGDLGLISGWGR.[T]	1xCarbamidomethyl [C9]; 1xOxidation [M]	P09871	WiMT
	[K].MGPTVSPICLPGTSSDYNLMDGDLGLISGWGR.[T]	1xCarbamidomethyl [C9]; 2xOxidation [M1; M20]	P09871	WiMT
	[R].MGPVTSAHVGTYR.[C]		Q8N149	WiMT
	[K].MGVEWTSCAEVVSQEK.[T]	1xCarbamidomethyl [C8]	P06681	WiMT
	[K].MGVEWTSCAEVVSQEK.[T]	1xCarbamidomethyl [C8]; 1xOxidation [M1]	P06681	WiMT
	[K].MHLYGLHEGQR.[V]		P22105-1	WiMT
	[K].MHLYGLHEGQR.[V]	1xOxidation [M1]	P22105-1	WiMT
	[K].MHSMNGFMYGNQPGLTMCK.[G]	1xCarbamidomethyl [C18]	P00450	MS2
	[K].MHSMNGFMYGNQPGLTMCK.[G]	1xCarbamidomethyl [C18]; 1xOxidation [M]	P00450	MS2
	[K].MHVLHCQGR.[N]	1xCarbamidomethyl [C6]	P10643	MS2
	[K].MHVLHCQGR.[N]	1xCarbamidomethyl [C6]; 1xOxidation [M1]	P10643	MS2
	[K].MKPVPDLVPGNFK.[S]		P02671	MS2
	[K].MKPVPDLVPGNFK.[S]	1xOxidation [M1]	P02671	MS2
	[R].MGPTELLIEMEDWKGDKVK.[A]		P02675	MS2
	[R].MLADAPPQDPSCCSGALYYGSK.[V]	2xCarbamidomethyl [C12; C13]	P19823	MS2
	[R].MGPTELLIEMEDWKGDK.[V]		P02675	MS2
	[R].MGPTELLIEMEDWK.[G]		P02675	MS2
	[K].MFQEIVHK.[S]	1xOxidation [M1]	Q96KN2	WiMT
	[R].MFQNFPTELLLSLAVEPLTANFHK.[W]		Q92820	WiMT
	[R].MFTTAPDQVDK.[E]		P00450	MS2
	[R].MFTTAPDQVDK.[E]	1xOxidation [M1]	P00450	MS2
	[R].MFTTAPDQVDKEDEDFQESNK.[M]		P00450	MS2
	[R].MFTTAPDQVDKEDEDFQESNK.[M]	1xOxidation [M1]	P00450	MS2
	[K].MGDHLALEDYLTTDLVETWLR.[N]		Q9UK55	MS2
	[K].MGDHLALEDYLTTDLVETWLR.[N]	1xOxidation [M1]	Q9UK55	WiMT
	[-].MGDQTVSDNELQEMSNQGSK.[Y]	1xMet-loss [N-Term]	P10909-6	MS2
	[K].MGIQHAYSENADFSGLTEDNGLK.[L]		P05543	MS2
	[K].MGIQHAYSENADFSGLTEDNGLK.[L]	1xOxidation [M1]	P05543	WiMT
	[K].MGNFPWQVFTNIHGR.[G]		P00736	MS2
	[K].MGNFPWQVFTNIHGR.[G]	1xOxidation [M1]	P00736	MS2
	[R].MGPTELLIEMEDWK.[G]	1xOxidation [M]	P02675	MS2
	[R].MLADAPPQDPSCCSGALYYGSK.[V]	2xCarbamidomethyl [C12; C13]; 1xOxidation [M1]	P19823	MS2
	[K].MLDAEDIVGTARPDEK.[A]		P12814	MS2
	[K].MLDAEDIVGTARPDEK.[A]	1xOxidation [M1]	P12814	WiMT
	[K].MLTPEHVFIHPGWK.[L]		P09871	MS2
	[K].MLTPEHVFIHPGWK.[L]	1xOxidation [M1]	P09871	MS2
	[R].MMAVAADTLQR.[L]		Q96KN2	MS2
	[R].MMAVAADTLQR.[L]	1xOxidation [M]	Q96KN2	WiMT
	[R].MMAVAADTLQR.[L]	2xOxidation [M1; M2]	Q96KN2	WiMT
	[R].MNNGDVDLTSDR.[Y]		Q12860	WiMT
	[R].MNSGECLGNVVSDER.[R]	1xCarbamidomethyl [C6]	Q9UK23	WiMT
	[K].MNTVIAALSR.[D]		P08185	MS2
	[K].MNTVIAALSR.[D]	1xOxidation [M1]	P08185	MS2
	[R].MNVAPACLPER.[D]	1xCarbamidomethyl [C7]	P00742	WiMT
	[R].MNVAPACLPER.[D]	1xCarbamidomethyl [C7]; 1xOxidation [M1]	P00742	WiMT
	[R].MNVAPACLPERDWAESTLMTQK.[T]	1xCarbamidomethyl [C7]	P00742	MS2
	[R].MPCAEDYLSVVLNQLCVLHEK.[T]	2xCarbamidomethyl [C3; C16]	P02768	MS2
	[R].MPCAEDYLSVVLNQLCVLHEK.[T]	2xCarbamidomethyl [C3; C16]; 1xOxidation [M1]	P02768	MS2
	[R].MLSSFLSEDVFK.[Q]		P15144	WiMT
	[K].MLSPGFDSSVYSDLCEAAEAVRPEER.[K]	1xCarbamidomethyl [C15]	Q86TH1	WiMT
	[K].MLQNVQMPSK.[K]	1xOxidation [M]	P27487	WiMT
	[K].MLEVPYVDR.[N]		P00742	MS2
	[K].MLEVPYVDR.[N]	1xOxidation [M1]	P00742	MS2
	[K].MLEVPYVDRNSCK.[L]	1xCarbamidomethyl [C12]	P00742	WiMT
	[K].MLGQMTDQVADLR.[A]		P18206	WiMT
	[K].MLGQMTDQVADLR.[A]	1xOxidation [M]	P18206	WiMT
	[R].MLHACTSEGSAHR.[K]	1xCarbamidomethyl [C5]	Q04756	MS2
	[R].MPCAEDYLSVVLNQLCVLHEKTPVSDRVTK.[C]	2xCarbamidomethyl [C3; C16]	P02768	MS2
	[R].MLHACTSEGSAHR.[K]	1xCarbamidomethyl [C5]; 1xOxidation [M1]	Q04756	MS2
	[K].MILEIAPTSDNDFGR.[Y]		O15394	WiMT
	[R].MIISGTTAHFSSK.[D]		Q6P179	WiMT
	[K].MINLSVPDTIDER.[TA]		P13796; P13797	WiMT
	[K].MINLSVPDTIDER.[TA]	1xOxidation [M1]	P13796; P13797	WiMT
	[K].MLQITNTGFEMK.[L]		P20742	MS2
	[K].MLQNVQMPSK.[K]		P27487	WiMT
	[R].MFLSFPTTK.[T]	1xOxidation [M1]	P69905	MS2
	[R].MVSDINNAWGCLEQVEK.[G]	1xCarbamidomethyl [C11]; 1xOxidation [M1]	P12814	WiMT
	[K].MVSGFIPLKPTVK.[M]	1xOxidation [M1]	P01023; P20742	MS2
	[K].NGVAQEPVHLDSPAIK.[H]		P04217	MS2
	[R].NGYPIPQVIWYK.[N]		P43121	WiMT
	[R].NHGVDDDGDDDGDDGGTDGPR.[H]		Q14515	WiMT
	[K].NHLQLEGLFFTNGEHTSK.[A]		P04114	MS2
	[R].NHNALLASLTTQK.[K]		O75882	MS2
	[R].NHPVATLMATGHPMVISSDDPAMFGAK.[G]		Q9NZK5	WiMT
	[K].NKADYVETVLDSTCSSTVQFLEYELNVLGTHK.[I]	1xCarbamidomethyl [C14]	P04114	WiMT
	[R].NKPGVYTDVAYYLAWIR.[E]		P00748	MS2
	[R].NKPGVYTDVAYYLAWIREHTVS.[-]		P00748	WiMT
	[RK].NKYEDEINKR.[T]		P04264; P04259; P02538; P13647	WiMT
	[K].NIAAFGGNPK.[S]		P06276	MS2
	[K].NLASRPYTFHSHGITYYK.[E]		P00450	MS2
	[R].NLAVSQVVHK.[A]		P01011	MS2
	[K].NGQWNDVPCSTSHLAVCEFPI.[-]	2xCarbamidomethyl [C9; C17]	P11226	WiMT
	[K].NLCEAMENFMQQLK.[E]	1xCarbamidomethyl [C3]	P20851	MS2
	[K].NGNMAGISDQR.[I]	1xOxidation [M4]	P05546	MS2
	[A].NFMLTQPHSVSESPGK.[T]	1xOxidation [M3]	P01721	MS2
	[R].NFPDLNTYIYYNEK.[Y]		P15169	MS2
	[R].NFPPSQDASGDLYTTSSQLTLPATQCLAGK.[S]	1xCarbamidomethyl [C26]	P01876	MS2
	[R].NFPPSQDASGDLYTTSSQLTLPATQCPDGK.[S]	1xCarbamidomethyl [C26]	P01877	MS2
	[K].NFPSPVDAAFR.[Q]		P02790	MS2
	[K].NFPSPVDAAFRQGHNSVFLIK.[G]		P02790	MS2
	[K].NFRTEHYEEQIEAFK.[S]		P02748	MS2
	[R].NFSDNQLQEGK.[N]		P37802	MS2
	[K].NFTEVHPDYGSHIQALLDK.[Y]		P04040	WiMT
	[K].NFVASHIANILNSEELDIQDLK.[K]		P04114	MS2
	[K].NFVASHIANILNSEELDIQDLKK.[L]		P04114	MS2
	[R].NGLYADNDNDSTFTGFLLYHDTN.[-]		Q15848	MS2
	[K].NGNMAGISDQR.[I]		P05546	MS2
	[K].NLDENYCR.[N]	1xCarbamidomethyl [C7]	P00747	MS2
	[K].NLDENYCRNPDGK.[R]	1xCarbamidomethyl [C7]	P00747	MS2
	[K].NLDGISHAPNAVK.[T]		Q92820	MS2
	[R].NLIAVLGEHDLSEHDGDEQSR.[R]		P08709	WiMT
	[K].NILDRQDPPSVVVTSHQAPGEK.[K]		P25311	MS2
	[K].NIIFVETSFTTLETR.[A]		P22792	WiMT
	[K].NILFVIDVSGSMWGVK.[M]		P19823	WiMT
	[R].NIIHGSDSVESAEK.[E]		P15531	WiMT
	[K].NLLHVTDTGVGMTR.[E]		P14625	WiMT
	[K].NILTSNNIDVK.[K]		P05090	MS2
	[R].NLMYVDIPIVDHQK.[C]	1xOxidation [M3]	O00187	WiMT
	[R].NLPATDPLQR.[E]		Q16610	MS2
	[K].NIPGDFECECPEGYR.[Y]	2xCarbamidomethyl [C8; C10]	P07225	MS2
	[K].NIPGDFECECPEGYRYNLK.[S]	2xCarbamidomethyl [C8; C10]	P07225	MS2
	[R].NLIAAVAPGAFLGLK.[A]		P35858	MS2
	[R].NLHDLDVSDNQLER.[V]		Q6EMK4	WiMT
	[K].NLGPIQLFYTR.[R]		P10912	WiMT
	[R].NLDLDSIIAEVK.[A]		Q5XKE5; P35908; P04259; P02538; O95678; P13647	MS2
	[RC].NLDIERPTYTNLNR.[L]		P68363; Q9H853; P68366	MS2
	[R].NLDILEGAITSAADQGAHIIVTPEDAIYGWNFNR.[D]		O95497	WiMT
	[R].NIDNPALADIYTEHAHQVVVAK.[Y]		O75083	MS2
	[K].NLDSNAVVIMVNYIFFK.[A]		P05154	WiMT
	[R].NIDVFNVEDQK.[R]		Q8NBJ4	WiMT
	[A].NFMLTQPHSVSESPGK.[T]		P01721	MS2
	[R].NLELGLTQGSFAFIHK.[D]		Q9UK55	MS2
	[K].NIFFSPLSISAAYAMLSLGACSHSR.[S]	1xCarbamidomethyl [C21]	P29622	MS2
	[R].NLFWTSYDTNK.[K]		Q07954	WiMT
	[R].NLGLFQHHDAITGTAK.[D]		Q16706	WiMT
	[R].NIETIINTFHQYSVK.[L]		P06702	MS2
	[K].MVSGFIPLKPTVK.[M]		P01023; P20742	MS2
	[K].NFINNPLAQADWAAK.[K]		P35579	MS2
	[R].NFGDLVSIQSESEK.[K]		P22897	WiMT
	[R].NAAENGAIQNLIK.[E]		P11226	MS2
	[K].NADLQVLKPEPELVYEDLR.[G]		P01833	MS2
	[R].NADYSYSVWK.[G]		P01031	MS2
	[R].NAEENLIYDYHLIDK.[L]		P20061	WiMT
	[K].NAGTCHVVDR.[R]	1xCarbamidomethyl [C5]	P46531	WiMT
	[K].NALALFVLPK.[E]		P05543	MS2
	[R].NALFCLESAWK.[T]	1xCarbamidomethyl [C5]	P01023	MS2
	[R].NALFCLESAWNVAK.[E]	1xCarbamidomethyl [C5]	P20742	MS2
	[K].NAIHTFVQSGSHLAAR.[E]		P04040	WiMT
	[K].NALQNIILYHLTPGVFIGK.[G]		Q15063-5	WiMT
	[R].NALTGLPPGLFQASATLDTLVLK.[E]		P02750	MS2
	[K].MYYSAVDPTK.[D]	1xOxidation [M1]	P00450	MS2
	[R].NALWHTGDTESQVR.[L]		P49747	MS2
	[K].MYYSAVDPTK.[D]		P00450	MS2
	[K].MVVESAYEVIK.[L]		P07195	WiMT
	[R].MYDAQQQQVGTNK.[C]		Q07954	WiMT
	[K].MYEQEWVR.[L]		P12259	MS2
	[K].MYEVVYQIGTETR.[S]		Q9UHG3	MS2
	[K].MYFDAVQAIETHLIR.[K]		P33908	WiMT
	[K].MYLGYEYVTAIR.[N]		P02787	MS2
	[K].MYLGYEYVTAIR.[N]	1xOxidation [M1]	P02787	MS2
	[K].MYLGYEYVTAIRNLR.[E]		P02787	MS2
	[R].MYQMDIQQELQR.[Y]		P04114	MS2
	[R].MYQMDIQQELQR.[Y]	1xOxidation [M]	P04114	MS2
	[R].MYQMDIQQELQR.[Y]	2xOxidation [M1; M4]	P04114	WiMT
	[R].MYSVNGYTFGSLPGLSMCAEDR.[V]	1xCarbamidomethyl [C18]	P00450	MS2
	[R].MYSVNGYTFGSLPGLSMCAEDRVK.[W]	1xCarbamidomethyl [C18]	P00450	MS2
	[R].MYVAVWTPYGVLR.[T]		P00488	WiMT
	[R].NALWHTGNTPGQVR.[T]		P07996; P35442	MS2
	[K].NAIWIDCGIHAR.[E]	1xCarbamidomethyl [C7]	Q96IY4	MS2
	[R].NANFKFTDHLK.[Y]		P00738	MS2
	[R].NECFLQHKDDNPNLPR.[L]	1xCarbamidomethyl [C3]	P02768	MS2
	[K].NEDSLVFVQTDK.[S]		P01023	MS2
	[K].NEEALDTESSER.[L]		Q92859	WiMT
	[R].NEENACHCSEDCLAR.[G]	3xCarbamidomethyl [C6; C8; C12]	Q13822	WiMT
	[R].NELESYAYSLK.[N]		P11021	MS2
	[R].NELIPLIYLENPR.[R]		P20742	MS2
	[R].NELIPLIYLENPRR.[N]		P20742	MS2
	[K].NEIWYRTEQAAVAR.[C]		P00748	WiMT
	[R].NENTFLDLTVQQIEHLNK.[T]		Q16851-2	WiMT
	[R].NEVTYDPYLVLIPDVAAYCPAYVVK.[S]	1xCarbamidomethyl [C19]	Q9Y6R7	MS2
	[R].NEVWWTIDGK.[K]		Q9NPH3	WiMT
	[R].NDYLDIYAIGVGK.[L]		P06681	WiMT
	[R].NDYCCFAAFPR.[L]	2xCarbamidomethyl [C4; C5]	O00533	MS2
	[K].NDNDNIFLSPLSISTAFAMTK.[L]	1xOxidation [M19]	P01008	MS2
	[K].NDNDNIFLSPLSISTAFAMTK.[L]		P01008	MS2
	[R].NANTFISPQQR.[W]		P08493	MS2
	[K].NAVPPVIHSPNDHVVYEK.[E]		Q9NPH3	MS2
	[R].NCCNTENPPGCYR.[Y]	3xCarbamidomethyl [C2; C3; C11]	P43652	WiMT
	[K].NCEDMDECSIR.[N]	2xCarbamidomethyl [C2; C8]	P35555	WiMT
	[K].NCELDVTCNIK.[N]	2xCarbamidomethyl [C2; C8]	P00740	MS2
	[K].NCGQMSEIEAK.[V]	1xCarbamidomethyl [C2]	Q9Y490	WiMT
	[R].NFGYTLR.[S]		P05546	MS2
	[K].NCNDFQYESK.[V]	1xCarbamidomethyl [C2]	Q04917	WiMT
	[R].NDASHLLVFTTDAK.[T]		P05106	MS2
	[R].NDDDEEEAAR.[E]		Q05682-4	WiMT
	[K].NDEAEYICIAENK.[A]	1xCarbamidomethyl [C8]	P13591	WiMT
	[R].NDGGIYTCFAENNR.[G]	1xCarbamidomethyl [C8]	Q12860	WiMT
	[R].NDLISATKTQVADAK.[R]		P19823	WiMT
	[R].NDLSPTTVMSEGAR.[N]		P30043	WiMT
	[K].NIPTVNENLENYYLEVNQLEK.[F]		P51884	MS2
	[R].MFLSFPTTK.[T]		P69905	MS2
	[K].LVGFIDDAVKK.[L]		P04114	WiMT
	[R].LVGGDNLCSGR.[L]	1xCarbamidomethyl [C8]	O43866	MS2
	[R].LVGGPMDASVEEEGVR.[R]		P01034	WiMT
	[R].LVGGPMDASVEEEGVRR.[A]		P01034	MS2
	[R].LVGGPMDASVEEEGVRR.[A]	1xOxidation [M6]	P01034	WiMT
	[R].LVGITSWGEGCAR.[R]	1xCarbamidomethyl [C11]	P03952	MS2
	[K].IVGPSGAAVPCK.[V]	1xCarbamidomethyl [C11]	P21333	MS2
	[R].LVHCPIETQVLR.[E]	1xCarbamidomethyl [C4]	Q99969	MS2
	[R].LVHVEEPHTETVR.[K]		P01023	MS2
	[R].LVHVEEPHTETVRK.[Y]		P01023	MS2
	[R].LVLADSGFWECR.[V]	1xCarbamidomethyl [C11]	P35590	WiMT
	[R].LVLAEAQVGDER.[D]		P50895	WiMT
	[K].LVGFIDDAVK.[K]		P04114	MS2
	[R].IVIEYVDR.[I]		P05156	MS2
	[K].IVGEDYPGWSEDSFGAR.[V]		Q86WI1	WiMT
	[R].LVDGVTECSGR.[L]	1xCarbamidomethyl [C8]	Q86VB7	MS2
	[R].LVDNYCEAWR.[T]	1xCarbamidomethyl [C6]	P39059	WiMT
	[R].IVEGSDAEIGMSPWQVMLFR.[K]		P00734	MS2
	[R].IVEGSDAEIGMSPWQVMLFR.[K]	1xOxidation [M]	P00734	MS2
	[R].IVEGSDAEIGMSPWQVMLFRK.[S]	1xOxidation [M]	P00734	WiMT
	[K].LVEHVPGQPVR.[N]		P24043	WiMT
	[R].LVEPVTDFLLDMPYHIR.[S]		P09619	WiMT
	[Q].LVETGGGLIQPGGSLR.[L]		P01767	MS2
	[K].LVFQQFDLEPSEGCFYDYVK.[I]	1xCarbamidomethyl [C14]	P00736	MS2
	[K].IVLGQEQDSYGGK.[F]		P02743	MS2
	[K].IVLGQEQDSYGGKFDR.[S]		P02743	WiMT
	[K].LVIIEGDLER.[T]		P06753-2; P06753	MS2
	[R].LVQAFQFTDK.[H]		Q06830	WiMT
	[R].LVQAFQYTDK.[H]		Q13162	WiMT
	[R].IVQFSPSGK.[F]		P19021	WiMT
	[K].IVQILPWEQNEQVK.[N]		P04114	MS2
	[R].IVQLIQDTR.[I]		P15169	MS2
	[R].IVQSHQQTGR.[S]		Q9BXJ4-3	WiMT
	[K].IVQTYHVNMAGTNPYTTITPQEINGK.[W]		P12814	WiMT
	[R].LVRPEVDVMCTAFHDNEETFLK.[K]	1xCarbamidomethyl [C10]	P02768	MS2
	[R].LVRPEVDVMCTAFHDNEETFLK.[K]	1xCarbamidomethyl [C10]; 1xOxidation [M9]	P02768	MS2
	[R].LVRPEVDVMCTAFHDNEETFLKK.[Y]	1xCarbamidomethyl [C10]	P02768	MS2
	[R].LVRPEVDVMCTAFHDNEETFLKK.[Y]	1xCarbamidomethyl [C10]; 1xOxidation [M9]	P02768	MS2
	[K].LVQAAQMLQSDPYSVPAR.[D]		P18206	WiMT
	[K].LVPPMEEDYPQFGSPK.[-]	1xOxidation [M5]	P08697	MS2
	[K].LVPPMEEDYPQFGSPK.[-]		P08697	MS2
	[R].LVPNPGQEDADRDGVGDVCQDDFDADK.[V]	1xCarbamidomethyl [C19]	P49747	MS2
	[K].LVILEGELER.[SA]		P67936-2; P67936; P07951-2	MS2
	[R].LVLLNAIYLSAK.[W]		P05155	MS2
	[R].IVLVDNK.[C]		P01591	MS2
	[R].LVDFYVMPVVNVDGYDYSWK.[K]	1xOxidation [M7]	Q96IY4	WiMT
	[K].LVNEVTEFAK.[T]		P02768	MS2
	[K].LVNGQSHISLSK.[A]		P0C0L4; P0C0L5	MS2
	[K].LVNMLDAVQENQHK.[M]		O95810	MS2
	[K].LVPFATELHER.[L]		P06727	MS2
	[K].LVNEVTEFAKTCVADESAENCDK.[S]	2xCarbamidomethyl [C12; C21]	P02768	MS2
	[K].LVSANRLFGDK.[S]		P01008	MS2
	[R].LVDFYVMPVVNVDGYDYSWK.[K]		Q96IY4	MS2
	[R].LVDEDMNSFK.[A]		Q06033	MS2
	[K].ITLIINWLQEALSSASLAHMK.[A]		P04114	MS2
	[K].ITLLSALVETR.[T]		P01011	MS2
	[K].ITLPVDFVTADK.[F]		P00558	MS2
	[R].LTLQGIISWGSGCGDR.[N]	1xCarbamidomethyl [C13]	P00748	MS2
	[R].ITISEDGNLR.[I]		Q8IWV2	WiMT
	[K].LTISEQNIQR.[A]		P04114	MS2
	[K].LTLTPWVGLR.[K]		O75882	MS2
	[K].LTLTPWVGLRK.[I]		O75882	MS2
	[R].LTLVCESAPGPITMDLTGDLEALK.[K]	1xCarbamidomethyl [C5]	P52566	WiMT
	[R].LTIYNANIEDAGIYR.[C]		O15394	WiMT
	[K].ITPNLAEFAFSLYR.[Q]		P01009	MS2
	[R].ITPSYVAFTPEGER.[L]		P11021	MS2
	[R].LTLLAPLNSVFK.[D]		Q15582	MS2
	[K].LTIHNITPGDAGEYVCK.[L]	1xCarbamidomethyl [C16]	Q8IZF2	WiMT
	[K].ITFMCNDHYILK.[G]	1xCarbamidomethyl [C5]	P20851	MS2
	[R].ITGLDPAEPCFQGTPELVR.[L]	1xCarbamidomethyl [C10]	P16233	WiMT
	[K].LTGISDPVTVK.[T]		Q99784	MS2
	[K].LTGSCSYVLFQNK.[E]	1xCarbamidomethyl [C5]	P04275	MS2
	[R].LTGSSGFVTDGPGNYK.[Y]		O75882	MS2
	[K].ITGTMPPLPLEATGLALSSLR.[L]		P08571	MS2
	[K].ITHLPGALLDK.[M]		P40197	WiMT
	[K].ITHYNYLILSK.[G]		P01031	MS2
	[R].ITQDAQLK.[S]		P08185	MS2
	[K].ITVVAGEHNIEETEHTEQK.[R]		P00740	MS2
	[K].ITVVDALHEIPVK.[K]		Q16270	WiMT
	[K].LTYTAEVSVPK.[E]		P09960	WiMT
	[R].LTYTNWNEGEPNNAGSDEDCVLLLK.[N]	1xCarbamidomethyl [C20]	P11226	MS2
	[R].IVASTLSNPELFEEWTGNVK.[T]		P17174	WiMT
	[R].LVAYYTLIGASGQR.[E]		P01024	MS2
	[K].LVCSGLLQASK.[S]	1xCarbamidomethyl [C3]	Q9UHG3	MS2
	[R].IVDDWANDGWGLK.[K]		P27824	WiMT
	[R].LTVSIEAR.[A]		P22792	MS2
	[K].ITVNSVSR.[D]		Q96P31	MS2
	[Q].LTVLSQPK.[A]		P15814	MS2
	[R].LTVLPPELGNLDLTGQK.[Q]		Q15404	WiMT
	[R].LTQLNLDR.[C]		P07359	MS2
	[R].LTQLYEQAR.[W]		Q86UX7	MS2
	[R].LTSLPLGALR.[G]		P07359	MS2
	[K].LTSLSDRYVSHFETEGPHVLLYFDSVPTSR.[E]		P0C0L4; P0C0L5	MS2
	[R].LVDEDMNSFK.[A]	1xOxidation [M6]	Q06033	WiMT
	[K].ITTAKENYDNAK.[L]		O75882	WiMT
	[R].ITTTSPWMFPSR.[M]		P04180	MS2
	[R].ITTVAHTEVGPGPESSPVVVR.[T]		Q13332-2	WiMT
	[R].LTVAAPPSGGPGFLSIERPDSRPPR.[V]		P0C0L4; P0C0L5	MS2
	[I].LTVDELLAIR.[I]		P13473	WiMT
	[R].LTVGAAQVPAQLLVGALR.[V]		P08571	MS2
	[K].ITTGGDVINNGLWNMVSVEELEHSISIK.[I]		P07225	MS2
	[R].MFIFAILPDGEVVGDSEK.[F]		P20742	MS2
	[R].LVSEDPINDGEWHR.[V]		P98160	WiMT
	[R].IVSLEPAYPPVFYLNK.[D]		Q14126	WiMT
	[R].MAPYQGPDAVPGALDYK.[S]		O43707	WiMT
	[-].MASGVAVSDGVIK.[V]	1xMet-loss+Acetyl [N-Term]	P23528	MS2
	[-].MASPDWGYDDK.[N]	1xMet-loss+Acetyl [N-Term]	P00915	MS2
	[R].MATNAAAQNAIK.[K]		Q9Y490	MS2
	[-].MATNWGSLLQDK.[Q]	1xMet-loss+Acetyl [N-Term]	P48637	WiMT
	[R].MCASYSELELVTSAK.[A]	1xCarbamidomethyl [C2]	Q9H4A9	WiMT
	[K].MCPQLQQYEMHGPEGLR.[V]	1xCarbamidomethyl [C2]	P01023	MS2
	[K].MCPQLQQYEMHGPEGLR.[V]	1xCarbamidomethyl [C2]; 1xOxidation [M]	P01023	MS2
	[K].MCPQLQQYEMHGPEGLR.[V]	1xCarbamidomethyl [C2]; 2xOxidation [M1; M10]	P01023	MS2
	[K].MCPQLQQYEMHGPEGLRVGFYESDVMGR.[G]	1xCarbamidomethyl [C2]	P01023	WiMT
	[K].MADEAGSEADHEGTHSTK.[R]		P02671	MS2
	[K].MADEAGSEADHEGTHSTK.[R]	1xOxidation [M1]	P02671	MS2
	[-].MADQLTEEQIAEFK.[E]	1xMet-loss+Acetyl [N-Term]	P0DP25	WiMT
	[-].MADSRDPASDQMQHWK.[E]	1xMet-loss+Acetyl [N-Term]	P04040	WiMT
	[R].MAEAELVQEGK.[A]		P31944	WiMT
	[-].MAEQEPTAEQLAQIAAENEEDEHSVNYKPPAQK.[S]	1xMet-loss+Acetyl [N-Term]	P52565	WiMT
	[K].MAESGYDIALLK.[L]		P03951	MS2
	[K].MAESGYDIALLK.[L]	1xOxidation [M1]	P03951	WiMT
	[R].MAFPCFDEPAFK.[A]	1xCarbamidomethyl [C5]	Q9NZ08	WiMT
	[-].MAGLNSLEAVK.[R]	1xMet-loss+Acetyl [N-Term]	P67936	MS2
	[-].MAGITTIEAVK.[R]	1xMet-loss+Acetyl [N-Term]	P06753-2	WiMT
	[-].MAGWNAYIDNLMADGTCQDAAIVGYK.[D]	1xCarbamidomethyl [C17]; 1xMet-loss+Acetyl [N-Term]	P07737	MS2
	[-].MAPPSVFAEVPQAQPVLVFK.[L]	1xMet-loss [N-Term]	P17174	WiMT
	[K].MDATANDVPSDR.[Y]		P13667	WiMT
	[K].MDATANDVPSPYEVR.[G]		P30101	WiMT
	[K].MEDSVGCLETAEEVK.[R]	1xCarbamidomethyl [C7]	P35579	MS2
	[-].MEEEIAALVIDNGSGMCK.[A]	1xCarbamidomethyl [C17]; 1xMet-loss+Acetyl [N-Term]	P63261	MS2
	[K].MEEVEAMLLPETLK.[R]		P01011	MS2
	[K].MEEVEAMLLPETLK.[R]	1xOxidation [M]	P01011	MS2
	[K].MEEVEAMLLPETLK.[R]	2xOxidation [M1; M7]	P01011	MS2
	[K].MEEVEAMLLPETLKR.[W]		P01011	WiMT
	[K].MEGDSVLLEVDGEEVLR.[L]	1xOxidation [M1]	P04278	WiMT
	[R].MELERPGGNEITR.[G]		P02671	MS2
	[R].MELERPGGNEITR.[G]	1xOxidation [M1]	P02671	MS2
	[R].MELERPGGNEITRGGSTSYGTGSETESPR.[N]		P02671	MS2
	[K].MELQEMQLK.[E]		P07951-2	WiMT
	[K].MENAELDVPIQSVFTR.[D]		P07996	MS2
	[K].MEDSGVYLCEGINQAGR.[S]	1xCarbamidomethyl [C9]	P19320	WiMT
	[R].MDWLVPATCEPIQSVFFFSGDK.[Y]	1xCarbamidomethyl [C9]; 1xOxidation [M1]	P04004	WiMT
	[K].MDCQECPEGYR.[V]	2xCarbamidomethyl [C3; C6]	P21333	MS2
	[-].MDDDIAALVVDNGSGMCK.[A]	1xCarbamidomethyl [C17]; 1xMet-loss+Acetyl [N-Term]	P60709	MS2
	[-].MDDREDLVYQAK.[L]	1xAcetyl [N-Term]	P62258	MS2
	[K].MDELRPLIPVLEEYK.[A]		Q99784	WiMT
	[K].MDSNELTFIPR.[D]		O14498	WiMT
	[K].MDSTANEVEAVK.[V]		P07237	WiMT
	[K].MDSTANEVEAVK.[V]	1xOxidation [M1]	P07237	WiMT
	[R].MDVFSQNMFCAGHPSLK.[Q]	1xCarbamidomethyl [C10]	P00736	MS2
	[R].MDVFSQNMFCAGHPSLK.[Q]	1xCarbamidomethyl [C10]; 1xOxidation [M]	P00736	MS2
	[R].MDWLVPATCEPIQSVFFFSGDK.[Y]	1xCarbamidomethyl [C9]	P04004	MS2
	[-].MAAATGPSFWLGNETLK.[V]	1xMet-loss+Acetyl [N-Term]	P12955	WiMT
	[R].LYWVDAFYDR.[I]		Q07954	WiMT
	[R].IWCSDPSPGIVAFPR.[L]	1xCarbamidomethyl [C3]	Q16620	WiMT
	[R].IWGPLQEDADIQVYR.[R]		Q76LX8	WiMT
	[K].IWHHTFYNELR.[V]		P60709; P68133; P63261	MS2
	[PR].IWLDNVR.[C]		O43866	MS2
	[R].LWLEGNPWDCGCPLK.[A]	2xCarbamidomethyl [C10; C12]	P35858	MS2
	[K].LYAQDADGCPIDIK.[V]	1xCarbamidomethyl [C9]	Q14315	WiMT
	[R].LYDFNSYWR.[V]		P22304	WiMT
	[K].LYDYCDVPQCAAPSFDCGKPQVEPK.[K]	3xCarbamidomethyl [C5; C10; C17]	P00747	MS2
	[R].LYFTHFDLELSHLCEYDFVK.[L]	1xCarbamidomethyl [C14]	O00187	WiMT
	[K].LWAYLTINQLLAER.[S]		P19823	MS2
	[R].IYGNQDTSSQLK.[K]		P19823	MS2
	[R].LWAYLTIEQLLEK.[R]		Q06033	WiMT
	[R].LVYHLGLPFSFLTFPYVEEAIK.[I]		P49908	MS2
	[K].LVSIGAEEIVDGNAK.[M]		O43707	WiMT
	[K].LVSIGAEEIVDGNVK.[M]		P12814	WiMT
	[K].LVSLSAQNLVDCSTEK.[Y]	1xCarbamidomethyl [C12]	P25774	WiMT
	[R].LVSNHSLHETSSVFVDSLTK.[A]		P21333	MS2
	[K].IVSSAMEPDREYHFGQAVR.[F]		P08603	MS2
	[K].IVSSAMEPDREYHFGQAVR.[F]	1xOxidation [M6]	P08603	MS2
	[K].LVTDLTKVHTECCHGDLLECADDR.[A]	3xCarbamidomethyl [C12; C13; C20]	P02768	MS2
	[K].LVTDLTKVHTECCHGDLLECADDRADLAK.[Y]	3xCarbamidomethyl [C12; C13; C20]	P02768	MS2
	[R].IVTNYFSAHDNDANLQMDIFLEEDGNVNSK.[L]		P00488	WiMT
	[R].IVVEDVDEPPVFSK.[L]		P55285	WiMT
	[K].LVVEWQLQDDK.[N]		P61916	WiMT
	[K].LVVQSSIDSSAFK.[H]		P10721	WiMT
	[K].LVYREYTDASFTNRK.[E]		P00450	MS2
	[R].IYGPSDSASR.[D]		Q6UX71	WiMT
	[R].LYGSEAFATDFQDSAAAK.[K]		P01011	MS2
	[R].LYQTDPSGTYHAWK.[A]		O14818	WiMT
	[R].IYSGILNLSDITK.[D]		P03952	MS2
	[R].LYSILGTTLK.[D]		O75083	WiMT
	[R].IYSLWEHSTK.[N]		P04114	MS2
	[R].LYSVSYLLK.[D]		P21333	MS2
	[R].IYTSPTWSAFVTDSSWSAR.[K]		Q08380	MS2
	[K].LYTVEYLSNMVGGR.[K]		Q13867	WiMT
	[R].IYVVDVGSEPR.[A]		Q13228	WiMT
	[R].IYWSDLSQR.[M]		P01130	WiMT
	[K].LYPIANGNNQSPVDIK.[T]		P00915	MS2
	[K].IYMTCPDCPSSIPTDSSNHQVLEAATESLAK.[Y]	2xCarbamidomethyl [C5; C8]; 1xOxidation [M3]	Q9UGM5	WiMT
	[K].IYMTCPDCPSSIPTDSSNHQVLEAATESLAK.[Y]	2xCarbamidomethyl [C5; C8]	Q9UGM5	MS2
	[K].IYGTTDNLCSR.[G]	1xCarbamidomethyl [C9]	P22897	WiMT
	[K].LYHAFSAMK.[K]		P05155	MS2
	[K].LYHSEAFTVNFGDTEEAK.[K]		P01009	MS2
	[K].LYHSEAFTVNFGDTEEAKK.[Q]		P01009	MS2
	[R].IYHSHIDAPK.[D]		P00450	MS2
	[-].MAAAAAAGEAR.[R]	1xMet-loss+Acetyl [N-Term]	P09417	WiMT
	[K].IYLSDSLTGK.[F]		Q7Z7G0	WiMT
	[R].LYISGGFGGVALGR.[L]		Q7Z7M0	WiMT
	[R].IYISGMAPRPSLAK.[K]		P04004	MS2
	[K].LYLVQGTQVYVFLTK.[G]		P02790	MS2
	[K].LYLVQGTQVYVFLTKGGYTLVSGYPK.[R]		P02790	WiMT
	[K].IYMADLESALHYILR.[I]		O00391	WiMT
	[K].LYIEYGIQR.[I]		Q9NPH3	MS2
	[K].LTFINDLCGPR.[R]	1xCarbamidomethyl [C8]	Q16610	MS2
	[R].NLQNNAEWVYQGAIR.[Q]		P04114	MS2
	[R].QIDDIDVRFQK.[A]		P04114	WiMT
	[K].QLEEDLYDGQVLQK.[L]		Q9HBI1-3	WiMT
	[K].QLEQVIAK.[D]		P02671	MS2
	[R].QIFHPEQLITGK.[E]		Q9H853	MS2
	[K].QLGAGSIEECAAK.[C]	1xCarbamidomethyl [C10]	P00747	MS2
	[K].QLGAGSIEECAAKCEEDEEFTCR.[A]	3xCarbamidomethyl [C10; C14; C22]	P00747	MS2
	[K].QLGCPTAVTAIGR.[V]	1xCarbamidomethyl [C4]	Q86VB7	WiMT
	[K].QIGGDGMMDITDTYK.[F]		P00488	MS2
	[K].QIGGDGMMDITDTYK.[F]	2xOxidation [M7; M8]	P00488	WiMT
	[R].QLLLTADDR.[V]		P04075	WiMT
	[K].QLANGVDRYISK.[Y]		P01024	WiMT
	[R].QLLPDGSLFISNVVHSK.[H]		Q92859	WiMT
	[R].QKVEPLRAELQEGAR.[Q]		P02647	MS2
	[K].QGYQLIEGNQVLHSFTAVCQDDGTWHR.[A]	1xCarbamidomethyl [C19]	P00736	MS2
	[K].QHIEAIDVR.[V]		P04114	MS2
	[R].QHIEMSTTGWVGR.[F]		P27487	WiMT
	[V].QHIQLLQK.[N]		P02671	MS2
	[K].QHQLGVWPLLPGSFK.[T]		P12259	MS2
	[K].QHSDPCALNPR.[M]	1xCarbamidomethyl [C6]	P04275	WiMT
	[R].QHVHPEETGGSDR.[Y]		P34096	WiMT
	[K].QHVVSVEEALLATGQWK.[S]		P07996	WiMT
	[K].QKPDGVFQEDAPVIHQEMIGGLR.[N]		P01024	MS2
	[K].QKPDGVFQEDAPVIHQEMIGGLR.[N]	1xOxidation [M18]	P01024	MS2
	[K].QKPDGVFQEDAPVIHQEMIGGLRNNNEK.[D]		P01024	MS2
	[K].QKWEAEPVYVQR.[A]		P25311	MS2
	[K].QLNEINYEDHK.[L]		P00751	MS2
	[R].QINVGNALEYVSR.[N]		P12111; P12111-4	WiMT
	[K].QNCELFEQLGEYK.[F]	1xCarbamidomethyl [C3]	P02768	MS2
	[K].QNCELFEQLGEYKFQNALLVR.[Y]	1xCarbamidomethyl [C3]	P02768	MS2
	[K].QNCELFEQLGEYKFQNALLVRYTK.[K]	1xCarbamidomethyl [C3]	P02768	MS2
	[K].QNDFNSVEEK.[K]		P10643	MS2
	[R].QNGAALTSASILAQQVWGTLVLLQR.[L]		Q96PD5	WiMT
	[K].QNHEQEVNTLR.[C]		Q14525	WiMT
	[R].QNLEPLFEQYINNLR.[R]		P04259; P02538; P13647	WiMT
	[K].QNLFMGENQFNVPK.[E]		O95497	WiMT
	[K].QNLFMGENQFNVPK.[E]	1xOxidation [M5]	O95497	WiMT
	[R].QNQEYQVLLDVK.[TA]		O76013	WiMT
	[R].QNQEYQVLLDVR.[A]		Q14532; Q15323; Q14525; Q92764	WiMT
	[R].QNVDHSQEAAK.[A]		O00391	WiMT
	[R].QPAVEEPAEVTATVLASR.[D]		P32942	WiMT
	[K].QMEQISQFLQAAER.[Y]		P37802	WiMT
	[K].QLYNVEATSYALLALLQLK.[D]		P01024	MS2
	[K].QLPGGQNPVSYVYLEVVSK.[H]		P01031	MS2
	[R].QIQVFEDEPAR.[I]		Q9NPH3	WiMT
	[R].QLRPEHFQEVGYAAPPSPPLSR.[S]		Q16610	WiMT
	[K].QLSFEEFIMLMAR.[L]		P06702	WiMT
	[K].QISNLQQSISDAEQR.[G]		P04264	MS2
	[R].QGYFVEAQPK.[I]		P02743	MS2
	[K].QISNLQQSISDAEQRGENALK.[D]		P04264	MS2
	[R].QITVNDLPVGR.[S]		Q06830; P32119	MS2
	[R].QLVESDINGLR.[R]		Q15323; Q92764	WiMT
	[R].QLVESDINSLR.[R]		Q14525	WiMT
	[R].QIVGYAIGTQQATPGPANSGR.[E]		P13688	WiMT
	[R].QLYGDTGVLGR.[F]		P07360	MS2
	[R].QLTSGPNQEQVSPLTLLK.[L]		P08697	MS2
	[K].QPFVQGLALYTPVVLPR.[S]		P01019	MS2
	[K].QGYDLSPLTPLSELSVQCNRGEVK.[Y]	1xCarbamidomethyl [C18]	P05160	WiMT
	[R].QGVDADINGLR.[Q]		P35527	MS2
	[K].QDSLSSQNQLGVLPLSWDIPELVNMGQWK.[I]	1xOxidation [M25]	P01024	MS2
	[R].QDWVDSGCPEESK.[E]	1xCarbamidomethyl [C8]	Q6UX71	WiMT
	[R].QEALELMNQNLDIYEQQVMTAAQK.[D]		P43251	MS2
	[R].QEALELMNQNLDIYEQQVMTAAQK.[D]	1xOxidation [M19]	P43251	WiMT
	[R].QEATTVSCFR.[G]	1xCarbamidomethyl [C8]	P26927	MS2
	[R].QECSIPVCGQDQVTVAMTPR.[S]	2xCarbamidomethyl [C3; C8]	P00734	MS2
	[R].QECSIPVCGQDQVTVAMTPR.[S]	2xCarbamidomethyl [C3; C8]; 1xOxidation [M17]	P00734	WiMT
	[K].QEDACQGDSGGPHVTR.[F]	1xCarbamidomethyl [C5]	P00742	MS2
	[K].QEDDLANINQWVK.[E]		P08697	MS2
	[R].QEDVIATANLSR.[KR]		Q9Y490	MS2
	[K].QEEASGGPTAPK.[A]		P50552	WiMT
	[R].QEEQTTCTTEGWSPEPR.[C]	1xCarbamidomethyl [C7]	P05160	MS2
	[R].QEGLMIASSLLNEGYLQPAGDMSK.[S]		P08567	WiMT
	[K].QDSLSSQNQLGVLPLSWDIPELVNMGQWK.[I]		P01024	MS2
	[R].QELAVFCSPEPPAK.[T]	1xCarbamidomethyl [C7]	Q9Y490	MS2
	[K].QCQDLGAFTESMVVFGCPN.[-]	2xCarbamidomethyl [C2; C17]	P01024	MS2
	[K].QCQDLGAFTESMVVFGCPN.[-]	2xCarbamidomethyl [C2; C17]; 1xOxidation [M12]	P01024	WiMT
	[R].QCRPNGMWDGETAVCDNGAGHCPNPGISLGAVR.[T]	3xCarbamidomethyl [C2; C15; C22]	P06681	WiMT
	[K].QCSHQISACNK.[D]	2xCarbamidomethyl [C2; C9]	P03951	MS2
	[K].QCTMFYSTSNIK.[I]	1xCarbamidomethyl [C2]	P01031	MS2
	[K].QCTMFYSTSNIK.[I]	1xCarbamidomethyl [C2]; 1xOxidation [M4]	P01031	MS2
	[K].QCVPHDQCACGVLTSEK.[R]	3xCarbamidomethyl [C2; C8; C10]	P22891	MS2
	[R].QCVPTEPCEDAEDDCGNDFQCSTGR.[C]	4xCarbamidomethyl [C2; C8; C15; C21]	P02748	MS2
	[R].QCVYDLCAQK.[G]	2xCarbamidomethyl [C2; C7]	Q9Y6R7	WiMT
	[K].QDACQGDSGGVFAVR.[D]	1xCarbamidomethyl [C4]	P00736	MS2
	[R].QDAQDLYEAGEK.[K]		P09525	WiMT
	[K].QDGFTDTGAYWR.[S]		P12821	WiMT
	[R].QDLGSPEGIAVDHLGR.[N]		P14543	WiMT
	[R].QDPPSVVVTSHQAPGEK.[K]		P25311	MS2
	[R].QEIECQNQEYSLLLSIK.[M]	1xCarbamidomethyl [C5]	P35527	WiMT
	[K].QEINSHVEMQTK.[G]		P05543	MS2
	[K].QEINSHVEMQTK.[G]	1xOxidation [M9]	P05543	WiMT
	[K].QGFFPDSVNK.[A]		P04114	MS2
	[K].QGFGNVATNTDGK.[N]		P02675	MS2
	[R].QGHNSVFLIK.[G]		P02790	MS2
	[R].QGHVEQCECFGGR.[T]	2xCarbamidomethyl [C7; C9]	Q04756	MS2
	[R].QGLLPVLESFK.[V]		P02647	MS2
	[R].QGIPFFAQVLLVDGK.[G]		P20742	MS2
	[R].QGIPFFGQVR.[L]		P01023	MS2
	[R].QGNMTAALQAALK.[N]		O15511	WiMT
	[R].QGQGQSEPGEYEQR.[L]		P43121	WiMT
	[R].QFVYLESDYSK.[L]		Q12884	WiMT
	[KR].QFVTPADVVSGNPK.[L]		P13797	WiMT
	[R].QFVTATDVVR.[G]		P13796	WiMT
	[K].QELSEAEQATR.[T]		P01024	MS2
	[K].QEPERNECFLQHK.[D]	1xCarbamidomethyl [C8]	P02768	MS2
	[K].QEPGENSEILPTLK.[Y]		P22352	MS2
	[R].QEPSQGTTTFAVTSILR.[V]		P01876	MS2
	[R].QEPSQGTTTFAVTSILRVAAEDWKK.[G]		P01876	MS2
	[K].QGYDLSPLTPLSELSVQCNR.[G]	1xCarbamidomethyl [C18]	P05160	MS2
	[K].QETLDGHMVVR.[S]		P13591	WiMT
	[K].QEYDESGPSIVHR.[K]		P60709; P63261	MS2
	[K].QFGAQANVIGPWIQTK.[M]		P12814	MS2
	[R].QFGPYCGHGFPGPLNIETK.[S]	1xCarbamidomethyl [C6]	P09871	MS2
	[K].QFSFPLSSEPFQGSYK.[V]		P01023	MS2
	[K].QFTSSTSYNR.[G]		P02671	MS2
	[K].QFTSSTSYNRGDSTFESK.[S]		P02671	MS2
	[K].QEVCEEFSQQLNSNGCITQQVHTK.[M]	2xCarbamidomethyl [C4; C16]	P20742	WiMT
	[K].QCGHQISACHR.[D]	2xCarbamidomethyl [C2; C9]	P03952	MS2
	[R].QPNCDDPETEEAALVAIDYINQNLPWGYK.[H]	1xCarbamidomethyl [C4]	P02765	MS2
	[R].QPSSAFAAFVK.[R]		P01024	MS2
	[K].RAQLGDLPWQVAIK.[D]		P05156	MS2
	[K].RATTVTGTPCQDWAAQEPHR.[H]	1xCarbamidomethyl [C10]	P00747	MS2
	[K].RATTVTGTPCQDWAAQEPHRHSIFTPETNPR.[A]	1xCarbamidomethyl [C10]	P00747	MS2
	[K].RCTDAVGDRR.[Q]	1xCarbamidomethyl [C2]	P02748	MS2
	[R].RDDDGALHAACQVQPSATLDAAQPR.[V]	1xCarbamidomethyl [C11]	P08294	WiMT
	[K].RDETLQDGCDTHFCK.[V]	2xCarbamidomethyl [C9; C14]	P04275	MS2
	[R].RDFTFDLYR.[A]		P05154	WiMT
	[R].RDGYLFQLLR.[I]		P04196	MS2
	[K].RDHALLEEQSK.[Q]		O43707	WiMT
	[K].RDLEIEVVLFHPNYNINGK.[K]		P00751	WiMT
	[K].RDLEIEVVLFHPNYNINGKK.[E]		P00751	WiMT
	[R].RDPPQYPVVPVHLDR.[I]		P10153	WiMT
	[R].RAPYPNYDRDILTIDIGR.[V]		Q16610	MS2
	[K].RDPSPVSGPVHLFR.[L]		Q9UJJ9	WiMT
	[R].RAPSVANVGSHCDLSLK.[I]	1xCarbamidomethyl [C12]	P21333	MS2
	[K].QWLEIDLLK.[I]		P12259	MS2
	[R].QYMPWEAALSSLSYFK.[L]		P15144	WiMT
	[R].QYSLQNWEAR.[L]		P48637	WiMT
	[K].QYWEYQFQHQPSQEECEGSSLSAVFEHFAMMQR.[D]	1xCarbamidomethyl [C16]	P04004	WiMT
	[K].QYWEYQFQHQPSQEECEGSSLSAVFEHFAMMQR.[D]	1xCarbamidomethyl [C16]; 1xOxidation [M30]	P04004	WiMT
	[R].RAEDGSVIDYELIDQDAR.[D]		P07355	WiMT
	[R].RALDQYLMEFNACR.[C]	1xCarbamidomethyl [C13]	P07357	MS2
	[K].RAPDLQDLPWQVK.[L]		P22891	MS2
	[K].RAPSTWLTAYVVK.[V]		P01024	MS2
	[K].RAPWCHTTNSQVR.[W]	1xCarbamidomethyl [C5]	P00747	MS2
	[K].RDPTAEQFQEELEK.[F]		P31944	WiMT
	[R].RDQALTEEHAR.[Q]		P12814	MS2
	[R].RDTANLFPQTSLTLHMWPDTEGTFNVECLTTDHYTGGMK.[Q]	1xCarbamidomethyl [C28]	P00450	MS2
	[R].RFEQLELRPVLYNYLDK.[N]		P0C0L4; P0C0L5	MS2
	[K].RFNALQYLR.[L]		P51884	MS2
	[R].RFTVETPDK.[N]		P05543	WiMT
	[K].RGDACEGDSGGPFVMK.[S]	1xCarbamidomethyl [C5]	P00734	MS2
	[K].RGDACEGDSGGPFVMK.[S]	1xCarbamidomethyl [C5]; 1xOxidation [M15]	P00734	MS2
	[R].RGDSPWQVVLLDSK.[K]		P04070	MS2
	[R].RGENLFAITDEGMDVPLAMEEWHHER.[E]		Q6UXB8	WiMT
	[R].RGENLFAITDEGMDVPLAMEEWHHER.[E]	1xOxidation [M13]	Q6UXB8	WiMT
	[R].RGENLFAITDEGMDVPLAMEEWHHER.[E]	2xOxidation [M13; M19]	Q6UXB8	WiMT
	[K].RGEQCVDIDECTIPPYCHQR.[C]	3xCarbamidomethyl [C5; C11; C17]	Q12805	MS2
	[K].RGFGSLNDEGEGEFWLGNDYLHLLTQR.[G]		P02671	MS2
	[R].RGHLFLQTDQPIYNPGQR.[V]		P0C0L4; P0C0L5	MS2
	[K].RGHSVCTNPSDK.[W]	1xCarbamidomethyl [C6]	Q16627	WiMT
	[R].RFDDAVVQSDMK.[H]		P11142	WiMT
	[K].RDTMVEDLVVLVR.[G]		P07358	MS2
	[K].RDTMVEDLVVLVR.[G]	1xOxidation [M4]	P07358	WiMT
	[K].REDAGTYWCEVFNPISK.[N]	1xCarbamidomethyl [C9]	P13688	WiMT
	[R].REDFDVEAADSAGNCLDSLVFVAGDR.[Q]	1xCarbamidomethyl [C15]	P09871	MS2
	[K].REEAPSLRPAPPPISGGGYR.[A]		P02675	MS2
	[R].RELDESLQVAER.[L]		P10909-6	WiMT
	[K].REPAVGEPAEVTTTVLVR.[R]		P05362	MS2
	[K].RESYSGVTLDPR.[G]		P01031	MS2
	[K].QVVESAYEVIK.[L]		P00338	WiMT
	[K].QRPPDLDTSSNAVDLLFFTDESGDSR.[G]		P00736	MS2
	[R].QRQEELCLAR.[Q]	1xCarbamidomethyl [C7]	P02753	MS2
	[R].QSEDSTFYLGER.[T]		P00450	MS2
	[K].QSGSECICMSPEEDCSHHSEDLCVFDTDSNDYFTSPACK.[F]	5xCarbamidomethyl [C6; C8; C15; C23; C38]	P13671	MS2
	[K].QSLEASLAETEGR.[Y]		P13645	MS2
	[K].QSLGELIGTLNAAK.[V]		P60174-1	WiMT
	[R].QSLGHGQHGSGSGQSPSPSR.[G]		Q86YZ3	MS2
	[R].QSMTLSSEVQIPDFDVDLGTILR.[V]		P04114	MS2
	[R].QSMTLSSEVQIPDFDVDLGTILR.[V]	1xOxidation [M3]	P04114	WiMT
	[R].QSPVDIDTHTAK.[Y]		P00918	MS2
	[R].QRPEVFSDNMFCVGDETQR.[H]	1xCarbamidomethyl [C12]; 1xOxidation [M10]	Q9NZP8	WiMT
	[R].QSSSYGPHGYGSGR.[S]		Q86YZ3	WiMT
	[R].QRPEVFSDNMFCVGDETQR.[H]	1xCarbamidomethyl [C12]	Q9NZP8	MS2
	[R].QQTHMLDVMQDHFSR.[A]	2xOxidation [M5; M9]	P10909-6	WiMT
	[R].QPVPGQQMTLK.[I]		P01024	MS2
	[R].QPVPGQQMTLK.[I]	1xOxidation [M8]	P01024	MS2
	[R].QPYSYDFPEDVAPALGTSFSHMLGATNPTQK.[T]		P06681	MS2
	[R].QPYSYDFPEDVAPALGTSFSHMLGATNPTQK.[T]	1xOxidation [M22]	P06681	WiMT
	[K].QQDHFFQAAFLEER.[D]		P08567	WiMT
	[R].QQELTHQEHR.[V]		P18206	MS2
	[K].QQEVVGFLEANK.[I]		P55822	WiMT
	[K].QQNAQGGFSSTQDTVVALHALSK.[Y]		P01023	MS2
	[K].QQNAQGGFSSTQDTVVALHALSKYGAATFTR.[T]		P01023	WiMT
	[K].QQNAQGGFSSTQDTVVALHALSKYGAATFTRTGK.[A]		P01023	WiMT
	[K].QQNAQGGFSSTQDTVVALHALSR.[Y]		P20742	MS2
	[R].QQQHLFGSNVTDCSGNFCLFR.[S]	2xCarbamidomethyl [C13; C18]	P02787	MS2
	[R].QQTEWQSGQR.[W]		P02649	MS2
	[R].QQTHMLDVMQDHFSR.[A]		P10909-6	MS2
	[R].QQTHMLDVMQDHFSR.[A]	1xOxidation [M]	P10909-6	MS2
	[R].QSTLSYQEPLR.[T]		P05160	WiMT
	[R].QSTLSYQEPLRT.[-]		P05160	MS2
	[R].QSTNAYPDLR.[S]		P07225	MS2
	[R].QVEGMEDWKQDSQLQK.[A]		P25311	WiMT
	[K].QVGSGVTTDQVQAEAK.[E]		P01871	MS2
	[R].QVLDNLTMEK.[S]		P35527	MS2
	[R].QVLDNLTMEK.[S]	1xOxidation [M8]	P35527	MS2
	[K].QVLLVGAPTYDDVSK.[V]		P80108	MS2
	[C].QVQLVESGGGVVQPGR.[S]		P01768	MS2
	[R].QVREPGQDLVVLPLSITTDFIPSFR.[L]		P01024	MS2
	[K].QVRPEHPAETEYDSLYPEDDL.[-]		P02679	MS2
	[R].QVRPIVGPFHAVLK.[L]		P23142	MS2
	[K].QVTPLFIHFR.[N]		P15144	WiMT
	[K].QVTQSYWDTNPTR.[A]		P07996	MS2
	[K].QVEAALQPQTLR.[K]		Q86U17	WiMT
	[K].QVCTDINECETGQHNCVPNSVCINTR.[G]	4xCarbamidomethyl [C3; C9; C16; C22]	P49747	WiMT
	[K].QVCTDIDECR.[N]	2xCarbamidomethyl [C3; C9]	P35443	WiMT
	[K].QVATALQNLQTK.[T]		P18206	MS2
	[R].QSVEADINGLR.[KR]		P13645	MS2
	[R].QSVGNEAEIWLGLNDMAAEGTWVDMTGAR.[I]		P05452	WiMT
	[R].QSVGNEAEIWLGLNDMAAEGTWVDMTGAR.[I]	1xOxidation [M16]	P05452	WiMT
	[K].QTACKPEIAYAYK.[V]	1xCarbamidomethyl [C4]	P01031	MS2
	[K].QTEQTYWQATPFR.[A]		P35443	WiMT
	[R].QTHQPPAPNSLIR.[F]		P02747	MS2
	[R].QTSPVSAMLVLVK.[S]		Q12805	MS2
	[K].QTTVSNSQQAYQEAFEISK.[K]		P31946	WiMT
	[K].QTVNLQLQPYSLVTTLNSDLK.[Y]		P04114	MS2
	[R].QTVSWAVTPK.[S]		P01023	MS2
	[K].QTWTDEGSVSER.[M]		Q9NZ08	WiMT
	[K].QVAASTAQLLVACK.[V]	1xCarbamidomethyl [C13]	Q9Y490	WiMT
	[R].QTIIVVLENVQR.[N]		P04114	MS2
	[R].NIQEYLSILTDPDGK.[G]		P04114	MS2
	[R].QAVDTAVDGVFIR.[S]		P19827	MS2
	[K].NRPSSGSLIQVVTTEGR.[T]		P09417	WiMT
	[K].NRPTSISWDGLDSGK.[L]		P30086	WiMT
	[K].NSCPPTSELLGTSDR.[L]	1xCarbamidomethyl [C3]	P22352	MS2
	[K].NSEEFAAAMSR.[Y]		P04114	MS2
	[K].NSEEFAAAMSR.[Y]	1xOxidation [M9]	P04114	MS2
	[K].NSEEFAAAMSRYELK.[L]		P04114	WiMT
	[K].NSGLTEEEAK.[H]		P13671	MS2
	[R].NSLCIENSCIAAHDK.[R]	2xCarbamidomethyl [C4; C9]	Q15582	MS2
	[K].NSLDCEIVSAK.[S]	1xCarbamidomethyl [C5]	Q01518	MS2
	[K].NSLESYAFNMK.[A]		P11142	WiMT
	[K].NSLFEYQK.[N]		P02671	MS2
	[K].NRNNALDFVTK.[S]		P04114	MS2
	[K].NQFSLQLNSVTPEDTAVYYCAR.[-]	1xCarbamidomethyl [C20]	A0A0B4J1U7	MS2
	[K].NQGILEFYGDDIALLK.[L]		P06681	MS2
	[R].NQGNTWLTAFVLK.[T]		P01023; P20742	MS2
	[R].NQGNTWLTAFVLKTFAQAR.[AS]		P01023; P20742	WiMT
	[K].NQILNLTTDNANILLQIDNAR.[L]		P13645	MS2
	[K].NQLTSNPENTVFDAK.[R]		P11021	MS2
	[K].NQVAMNPTNTVFDAK.[R]		P11142	MS2
	[K].NQVSLTCLVK.[G]	1xCarbamidomethyl [C7]	P01857; P01861; P01859; P01860	MS2
	[K].NQVVIAAGR.[S]		P80108	MS2
	[K].NQVVLTMTNMDPVDTATYYCAHR.[-]	1xCarbamidomethyl [C20]	P01817	MS2
	[K].NQVVLTMTNMDPVDTATYYCAR.[I]	1xCarbamidomethyl [C20]	A0A0C4DH43	MS2
	[R].NRCPPPPLPINSK.[I]	1xCarbamidomethyl [C3]	P05160	WiMT
	[R].NRDVVLTTTFVDDIK.[A]		P02748	MS2
	[K].NRMDVFSQNMFCAGHPSLK.[Q]	1xCarbamidomethyl [C12]	P00736	WiMT
	[K].NSLFFSAQPFEITASTNNEGNLK.[V]		P04114	MS2
	[R].NSLGGFASTQDTTVALK.[A]		Q6YHK3	WiMT
	[K].NSLLGMEGANSIFSGFLLFPDMEA.[-]		P02746	MS2
	[K].NTAEWLLSHTK.[H]		P00491	WiMT
	[K].NTASLKYENYELTLK.[S]		P04114	MS2
	[K].NTCNHDEDTWVECEDPFDLR.[L]	2xCarbamidomethyl [C3; C13]	O43866	MS2
	[R].NTEILTGSWSDQTYPEGTQAIYK.[C]		P08603	MS2
	[R].NTEQEEGGEAVHEVEVVIK.[H]		P00742	MS2
	[R].NTGMETPTGVCAALAAAGVQPHSLDLSHNSLR.[A]	1xCarbamidomethyl [C11]	P08571	MS2
	[R].NTGTEAPDYLATVDVDPK.[S]		Q13228	WiMT
	[R].NTGVISVVTTGLDR.[E]		P12830	WiMT
	[R].NTIEETGNLAEQAR.[A]		P11047	WiMT
	[K].NTLELSNGVIVK.[I]		P04114	MS2
	[K].NTLYLQMNNLR.[A]		A0A0C4DH36	MS2
	[K].NTLYLQMNSLK.[T]		A0A0B4J1V0	MS2
	[K].NSVVEASEAAYK.[E]		Q04917	WiMT
	[K].NSVSQISVLSGGK.[A]		O15143	WiMT
	[R].NSVDELNNNVEAVSQTSSSSFQYMYLLK.[D]	1xOxidation [M24]	P02675	MS2
	[R].NSVDELNNNVEAVSQTSSSSFQYMYLLK.[D]		P02675	MS2
	[K].NSLLGMEGANSIFSGFLLFPDMEA.[-]	1xOxidation [M22]	P02746	WiMT
	[K].NSLLGMEGANSIFSGFLLFPDMEA.[-]	2xOxidation [M6; M22]	P02746	WiMT
	[R].NSLWHTGDTSDQVR.[L]		P35443	WiMT
	[K].NSLYLQMNSLK.[T]		A0A0B4J1Y9	MS2
	[K].NQFNDYTSK.[K]		P06276	MS2
	[K].NSLYLQMNSLKTEDTAVYYCAR.[-]	1xCarbamidomethyl [C20]	A0A0B4J1Y9	MS2
	[K].NSLYLQMNSLR.[AT]	1xOxidation [M7]	P0DP04; A0A0B4J1X8; P01780; A0A0B4J1V1; P01766; A0A0C4DH32	MS2
	[K].NSNPALNDNLEK.[G]		O00299	MS2
	[K].NSTIVFPLPIDMLQGIIGAK.[H]		P27105	MS2
	[K].NSLYLQMNSLR.[AT]		P0DP04; A0A0B4J1X8; P01780; A0A0B4J1V1; P01766; A0A0C4DH32	MS2
	[K].NTLYLQMNSLR.[A]		P01768; A0A0B4J1X5; P01764; P01767	MS2
	[R].NQECIALPENICGIGWHLVGNSCLK.[I]	3xCarbamidomethyl [C4; C12; C23]	O75882	MS2
	[R].NPYYGGESSSITPLEELYK.[R]		P31150	WiMT
	[R].NNANGVDLNR.[N]		P15169	WiMT
	[R].NNEEWTVDSCTECHCQNSVTICK.[K]	4xCarbamidomethyl [C10; C13; C15; C22]	P07996	MS2
	[R].NNEEYLALIFEK.[G]		O00391	MS2
	[K].NNEGTYYSPNYNPQSR.[S]		P00450	MS2
	[KE].NNLEALEDFEK.[A]		P31025	WiMT
	[R].NNLELSTPLK.[I]		P07225	MS2
	[R].NNLFTSSAGYR.[A]		P12111; P12111-4	WiMT
	[R].NNNRPSGISER.[F]		A0A075B6I4	MS2
	[R].NNQIDHIDEK.[A]		P51884	MS2
	[R].NPCQDPYILTPENR.[C]	1xCarbamidomethyl [C3]	Q12805	MS2
	[R].NPCTDGTHDCNK.[N]	2xCarbamidomethyl [C3; C10]	P07996	WiMT
	[R].NPDADTGPWCFTMDPSIR.[W]	1xCarbamidomethyl [C10]	P08519	MS2
	[R].NPDAEIRPWCYTMDPSVR.[W]	1xCarbamidomethyl [C10]	P08519	MS2
	[K].NMQDMVEDYRNK.[Y]		P04264	WiMT
	[R].NPDAEISPWCYTMDPNVR.[W]	1xCarbamidomethyl [C10]	P08519	MS2
	[K].NMQDMVEDYR.[N]	2xOxidation [M2; M5]	P04264	MS2
	[K].NMQDMVEDYR.[N]		P04264	MS2
	[K].NIQSLEVIGK.[G]		P02775	MS2
	[K].NLTDFAEQYSIQDWAK.[R]		P04114	MS2
	[R].NLVTMTTAPR.[G]	1xOxidation [M5]	Q16853	WiMT
	[K].NMATRPYSIHAHGVQTESSTVTPTLPGETLTYVWK.[I]		P00450	MS2
	[K].NMATRPYSIHAHGVQTESSTVTPTLPGETLTYVWK.[I]	1xOxidation [M2]	P00450	MS2
	[K].NMDPLNDNIATLLHQSSDK.[F]		P35579	MS2
	[K].NMEVSVATTTK.[A]		P04114	MS2
	[K].NMEVSVATTTK.[A]	1xOxidation [M2]	P04114	MS2
	[R].NMQDLVEDFK.[N]		P13647	WiMT
	[K].NMQDMVEDYR.[N]	1xOxidation [M]	P04264	MS2
	[R].NPDAVAAPYCYTR.[D]	1xCarbamidomethyl [C10]	P08519	MS2
	[R].NPDDITNEEYGEFYK.[S]		P07900	WiMT
	[K].NPDDPDTVDVIMHMLDR.[D]		Q5D862	WiMT
	[K].NPLGEGPVSNTVAFSTESADPR.[V]		Q7Z7G0	WiMT
	[K].NPNGYSFSIPVK.[V]		P04114	MS2
	[R].NPNLPPETVDSLK.[N]		P05090	MS2
	[K].NPREDYLDVYVFGVGPLVNQVNINALASK.[K]		P00751	MS2
	[R].NPSDPMPQAPALWIETTAYALLHLLLHEGK.[A]		P0C0L4; P0C0L5	WiMT
	[R].NPSDPMPQAPALWIETTAYALLHLLLHEGK.[A]	1xOxidation [M6]	P0C0L4; P0C0L5	WiMT
	[R].NPSRNNVPCSPK.[V]	1xCarbamidomethyl [C9]	P0C0L4; P0C0L5	WiMT
	[R].NPSSAGSWNSGSSGPGSTGNR.[N]		P02671	MS2
	[R].NPTDSLYCCDR.[A]	2xCarbamidomethyl [C8; C9]	O95980	WiMT
	[R].NPYYGGESASITPLEDLYK.[R]		P50395	WiMT
	[R].NPGNQAAYEHFETMK.[N]		P18206	MS2
	[R].NPFVFAPTLLTVAVHFEEVAK.[S]		P43652	WiMT
	[R].NPFNCVCPLSWFGPWVR.[E]	2xCarbamidomethyl [C5; C7]	Q6EMK4	WiMT
	[K].NPDEEDNTFYQR.[L]		Q9BS40	WiMT
	[R].NPDGDPGGPWCYTTDPAVR.[F]	1xCarbamidomethyl [C11]	P26927	MS2
	[R].NPDGDVGGPWCYTTNPR.[K]	1xCarbamidomethyl [C11]	P00747	MS2
	[R].NPDGDVGGPWCYTTNPRK.[L]	1xCarbamidomethyl [C11]	P00747	MS2
	[R].NPDGSERPWCYTTDPQIER.[E]	1xCarbamidomethyl [C10]	Q2TV78; P26927	MS2
	[K].NQDVHSINLPFFETLQEYFER.[N]		P04114	MS2
	[R].NPDNDERPWCYVVK.[D]	1xCarbamidomethyl [C10]	Q04756	MS2
	[R].NPDNDPQGPWCYTTDPEK.[R]	1xCarbamidomethyl [C11]	P00747	MS2
	[R].NPDPVAAPWCYTTDPSVR.[W]	1xCarbamidomethyl [C10]	P08519	MS2
	[R].NPDPVAAPYCYTR.[D]	1xCarbamidomethyl [C10]	P08519	MS2
	[R].NPDSSTTGPWCYTTDPTVR.[R]	1xCarbamidomethyl [C11]	P00734	MS2
	[R].NPETDTYILFNPWCEDDAVYLDNEK.[E]	1xCarbamidomethyl [C14]	P00488	WiMT
	[R].NPDNDIRPWCFVLNR.[D]	1xCarbamidomethyl [C10]	P00748	MS2
	[R].QAVQELVSLYYEEAR.[S]		P54802	WiMT
	[K].NTLYLQMNSLR.[A]	1xOxidation [M7]	P01768; A0A0B4J1X5; P01764; P01767	MS2
	[K].NTLYLQMSSLR.[A]		A0A0J9YX35	MS2
	[K].PLIGTVLAMDPDAAR.[H]		P33151	WiMT
	[F].PILLDFK.[T]		P05546	MS2
	[K].PLSVSYDQATSLR.[I]		P00918	MS2
	[K].PISVSYNPATAK.[E]		P00915	MS2
	[T].PLTATLSK.[S]		P01876	MS2
	[K].PIWLSQMSCSGR.[E]	1xCarbamidomethyl [C9]	O43866	MS2
	[S].PIYNLVPVK.[M]		P02748	MS2
	[T].PNLAEFAFSLYR.[Q]		P01009	MS2
	[L].PPGLLTPTPK.[L]		P07359	WiMT
	[P].PPPLPINSK.[I]		P05160	WiMT
	[D].PPSVVVTSHQAPGEK.[K]		P25311	MS2
	[T].PQQAQEVHEK.[L]		P60174-1	WiMT
	[A].PLAEDVR.[G]		P06727	MS2
	[D].PQTFYYAVAVVK.[K]		P02787	MS2
	[I].PHHNYNAAINK.[Y]		P00740	WiMT
	[E].PGVDYVYK.[T]		P01024	WiMT
	[S].PELQAEAK.[S]		P02652	MS2
	[F].PEVDVLTK.[Y]		P04114	MS2
	[L].PEVFLSK.[V]		P02774	MS2
	[K].PFDAFTDLK.[N]		P04004	MS2
	[M].PFDPQDTHQSR.[F]		P01011	WiMT
	[R].PFLVFIR.[E]		P01008	MS2
	[H].PFTVEEFVLPK.[F]		P01023; P20742	WiMT
	[A].PGELEHGLITFSTR.[N]		P48740; P48740-2	WiMT
	[E].PGENSEILPTLK.[Y]		P22352	WiMT
	[R].PGGGFVPNFQLFEK.[G]		P22352	MS2
	[L].PGHSAGPR.[T]		P17813	WiMT
	[K].PGQDTCQGDSGGPLTCEK.[D]	2xCarbamidomethyl [C6; C16]	Q14520	MS2
	[K].PSAGNNSLYR.[D]		P02749	WiMT
	[I].PSDGPSVACVK.[K]	1xCarbamidomethyl [C9]	P02787	MS2
	[K].QAAGSGHLLALGTPENPSWLSLHLQDQK.[V]		P04278	MS2
	[K].QAEISASAPTSLR.[S]		P04278	MS2
	[R].QAELTVQVK.[GE]		P15151	WiMT
	[R].QAEVTFVGHPGNLVIK.[Q]		P14543	WiMT
	[K].QAFDDAIAELDTLNEDSYK.[D]		Q04917	WiMT
	[R].QAGLGNHLSGSER.[L]		Q15582	WiMT
	[K].QAGPASVPLRTEEEFK.[K]		P30101	WiMT
	[K].QALEEFQK.[E]		P07358	MS2
	[K].QALNTDYLDSDYQR.[G]		O94919	WiMT
	[R].QAPGQGLEWMGWINPNSGGTNYAQK.[F]		P23083	MS2
	[R].QAQCGQDFQCK.[E]	2xCarbamidomethyl [C4; C10]	P07357	MS2
	[K].QAVAQILPFR.[D]		O95479	WiMT
	[K].QAAASATQTIAAAQHAASTPK.[A]		Q9Y490	MS2
	[M].PYQYPALTPEQK.[K]		P04075	WiMT
	[E].PYADQLR.[T]		P06727	MS2
	[K].PVTLWCQGPLETEEYR.[L]	1xCarbamidomethyl [C6]	O75023	WiMT
	[Q].PSGGTNINEALLR.[A]		P19823	WiMT
	[R].PSGIPER.[F]		P01718; A0A075B6K4; A0A075B6K5; A0A075B6K0	MS2
	[S].PSSLSASVGDR.[V]		A0A0B4J2D9; A0A075B6S5; P0DSN7; P01593; P04430; P01599; P01601	MS2
	[L].PTGDVIGDSAK.[Y]		P01023	MS2
	[R].PVAFSVVPTAAAAVSLK.[V]		P0C0L4	MS2
	[R].PVAFSVVPTAATAVSLK.[V]		P0C0L5	MS2
	[S].PVDAAFR.[Q]		P02790	MS2
	[F].PVEMTHNHNFR.[L]	1xOxidation [M4]	P05546	WiMT
	[L].PVLESFK.[V]		P02647	MS2
	[K].PVNTFVHEPLVDVQNVCFQEK.[V]	1xCarbamidomethyl [C17]	P07998	MS2
	[K].NTLYLQMNSLRAEDTAVYYCAK.[-]	1xCarbamidomethyl [C20]	P01768; P01764	MS2
	[K].NVPLPVIAELPPK.[V]		P01871	MS2
	[R].NVQALEIELQSQLALK.[Q]		P13645	MS2
	[K].NVQDAIADAEQR.[G]		P35908	MS2
	[K].NVQDAIADAEQRGEHALK.[D]		P35908	MS2
	[R].NVQFNYPHTSVTDVTQNNFHNYFGGSEIVVAGK.[F]		P19823	MS2
	[R].NVSTGDVNVEMNAAPGVDLTQLLNNMR.[S]		P13645	MS2
	[R].NVSTGDVNVEMNAAPGVDLTQLLNNMR.[S]	1xOxidation [M11]	P13645	MS2
	[R].NVSTGDVNVEMNAAPGVDLTQLLNNMR.[S]	2xOxidation [M11; M26]	P13645	WiMT
	[K].NVTELNEPLSNEER.[N]		P61981	WiMT
	[K].NVVYTCNEGYSLIGNPVAR.[C]	1xCarbamidomethyl [C6]	P10643	MS2
	[R].NVPDDILQLLK.[K]		Q9H4A9	WiMT
	[R].NVWVHLDGPGVTRPMK.[K]		P00488	WiMT
	[K].NVNIQNFHISWK.[D]		P12814	MS2
	[K].NTMILEICTR.[Y]	1xCarbamidomethyl [C8]	P01024	MS2
	[K].NTMILEICTR.[Y]	1xCarbamidomethyl [C8]; 1xOxidation [M3]	P01024	MS2
	[K].NTNDANSCQIIIPQNQVNR.[K]	1xCarbamidomethyl [C8]	P31150; P50395	WiMT
	[R].NTPEYEELCPR.[G]	1xCarbamidomethyl [C9]	P35555	WiMT
	[K].NTVISVNPSTK.[L]		P19320	WiMT
	[K].NTWSILHTQGALVQGGYGHSSVYDHR.[T]		O75882	MS2
	[K].NVAFVIDISGSMAGR.[K]		Q06033	WiMT
	[R].NVALVSGDTENAK.[G]		Q16610	MS2
	[R].NVDDCSPDPCHHGR.[C]	2xCarbamidomethyl [C5; C10]	Q9UM47	WiMT
	[R].NVDGVNYASITR.[N]		Q9UBR2	WiMT
	[R].NVELQCLDADDAK.[A]	1xCarbamidomethyl [C6]	P02730	MS2
	[R].NVGSQTLQTFK.[A]		P08514	MS2
	[K].NVHLFATPLAASLEEVAPGAR.[H]		P35916-1	WiMT
	[R].NVHSGSTFFK.[Y]		Q14624	MS2
	[K].NVLVTLYERDEDNNLLTEK.[Q]		P09486	WiMT
	[R].NVWVHLDGPGVTRPMK.[K]	1xOxidation [M15]	P00488	WiMT
	[K].NWETEITAQPDGGK.[T]		P05452	MS2
	[K].NYSPYYNTIDDLK.[D]		P35527	MS2
	[S].PAFLASQNTK.[G]		P20742	WiMT
	[R].PAFSAIR.[R]		P02745	MS2
	[R].PAHVVVGDVLQAADVDK.[T]		P30043	WiMT
	[A].PANADFAFR.[F]		P29622	WiMT
	[R].PAPEDLTVVLGQER.[R]		P00748	MS2
	[K].PATPEIQEIVDK.[V]		P01040	WiMT
	[D].PAVSVALGQTVR.[I]		P01714	MS2
	[N].PDGDVGGPWCYTTNPR.[K]	1xCarbamidomethyl [C10]	P00747	MS2
	[V].PDTFEGHFDGVPVISK.[G]		P19823	WiMT
	[K].NYNLVESLK.[L]		P05546	MS2
	[K].NYHMYVYPVHWQFSELDQHPMDR.[V]		Q14515	WiMT
	[K].NYCRNPDGDVGGPWCYTTNPRK.[L]	2xCarbamidomethyl [C3; C15]	P00747	MS2
	[R].NWGLGGHAFCR.[N]	1xCarbamidomethyl [C10]	P00748	MS2
	[K].NWGLSFYADKPETTK.[E]		P19652	MS2
	[K].NWGLSVYADK.[P]		P02763	MS2
	[K].NWGLSVYADKPETTK.[E]		P02763	MS2
	[R].NWMNSLGVNPR.[V]		P13796	WiMT
	[K].NWQWGGLTCDHYEEAK.[I]	1xCarbamidomethyl [C9]	Q86VB7	WiMT
	[K].NYAEAKDVFLGMFLYEYAR.[R]		P02768	MS2
	[K].NYAEAKDVFLGMFLYEYAR.[R]	1xOxidation [M12]	P02768	MS2
	[K].NYAEAKDVFLGMFLYEYARR.[H]		P02768	MS2
	[K].NYAEVGR.[V]		P00739	MS2
	[K].NYCGLPGEYWLGNDK.[I]	1xCarbamidomethyl [C3]	P02675	MS2
	[K].NYCGLPGEYWLGNDKISQLTR.[M]	1xCarbamidomethyl [C3]	P02675	MS2
	[K].NYCRNPDGDVGGPWCYTTNPR.[K]	2xCarbamidomethyl [C3; C15]	P00747	MS2
	[K].RGIISALLVPPETEEAK.[Q]		P04114	MS2
	[R].LTEVLLGHNSWR.[C]		P40197	WiMT
	[K].IECVSAETTEDCIAK.[I]	2xCarbamidomethyl [C3; C12]	P02787	MS2
	[R].IEDANLIPPVPDDK.[F]		P07996	MS2
	[R].IEDGVPQHLVLVLGGK.[S]		P12111; P12111-4	WiMT
	[R].LEDGVQACHATGCGR.[C]	2xCarbamidomethyl [C8; C13]	Q9Y6R7	WiMT
	[R].IEDLPTMVTLGNSFLHK.[L]		P04275	MS2
	[R].IEDLPTMVTLGNSFLHK.[L]	1xOxidation [M7]	P04275	WiMT
	[R].LEDMEQALSPSVFK.[A]		P05155	MS2
	[R].LEDMEQALSPSVFK.[A]	1xOxidation [M4]	P05155	WiMT
	[R].LEDSVTYHCSR.[G]	1xCarbamidomethyl [C9]	P00751	MS2
	[R].IEEELGDEAR.[F]		P09104	WiMT
	[K].LECNGENDCGDNSDERDCGR.[T]	3xCarbamidomethyl [C3; C9; C18]	P13671	MS2
	[K].LECNGENDCGDNSDER.[D]	2xCarbamidomethyl [C3; C9]	P13671	MS2
	[K].LECFALGNPIPQINWR.[R]	1xCarbamidomethyl [C3]	Q9P232	WiMT
	[K].IDVHWTR.[A]		P25311	MS2
	[K].IDVMPIQILANEEMK.[V]		Q8IZF2	WiMT
	[R].LDVPQNLMFGK.[W]		Q13740	WiMT
	[R].LDVPVWDVEATLNFLK.[A]		O00391	WiMT
	[K].LDVQFSGLTK.[G]		P21333	MS2
	[K].IDVSSNGEDWITIK.[E]		O14786	WiMT
	[K].IDYCILDPCR.[N]	2xCarbamidomethyl [C4; C9]	Q8NFT8	WiMT
	[K].LDYNNIPTVVFSHPPIGTVGLTEDEAIHK.[Y]		P00390	WiMT
	[R].LEACESLTR.[V]	1xCarbamidomethyl [C4]	Q04756	MS2
	[K].IEAELQDICNDVLELLDK.[Y]	1xCarbamidomethyl [C9]	P31946	WiMT
	[R].LEAGDHPVELLAR.[D]		P09486	WiMT
	[K].LEAGINQLSFPLSSEPIQGSYR.[V]		P20742	MS2
	[R].LEALPNSLLAPLGR.[L]		P35858	MS2
	[R].LEAVSHTSDMHR.[G]		Q01518	MS2
	[A].LEELAAK.[E]		Q9C0B1	MS2
	[K].LEEIDGFFAR.[N]		O00391	MS2
	[K].IEELLPGSSIDAETR.[L]		P50453	WiMT
	[R].LEHCIEFVVR.[G]	1xCarbamidomethyl [C4]	Q16288	WiMT
	[K].IEIDPQFQVVR.[T]		Q8N1N4	WiMT
	[R].LELELRPTGEIEQYSVSATYELQR.[E]		P04114	MS2
	[R].LELELRPTGEIEQYSVSATYELQREDR.[A]		P04114	MS2
	[R].IEIESFYEGEDFSETLTR.[A]		P11021	WiMT
	[R].LELHVDGPPPRPQLR.[A]		P04217; P04217-2	MS2
	[K].LELLSLSK.[N]		P22792	MS2
	[K].IEIPLPFGGK.[S]		P04114	MS2
	[K].LEIQSQVDSQHVGHSVLTAK.[G]		P04114	MS2
	[K].LELSVDGAKQYR.[N]		P0C0L4; P0C0L5	WiMT
	[R].LEIWDGFPDVGPHIGR.[Y]		O14786	WiMT
	[K].LEMNYVVGGVVSHR.[N]		P23142	WiMT
	[K].LEGSAPTDVLDSLTTIPELK.[D]		Q86UX7	MS2
	[K].LEGQMGEDGNSIK.[V]	1xOxidation [M5]	P13591	WiMT
	[K].LEGQMGEDGNSIK.[V]		P13591	WiMT
	[K].LEGPNNVECTTSGR.[W]	1xCarbamidomethyl [C9]	P16109	WiMT
	[K].LEEQAQQIR.[L]		P02649	MS2
	[K].LEESYDMESVLR.[N]		P35237	WiMT
	[K].LEESYTLNSDLAR.[L]		P30740	WiMT
	[K].IEFEWNTGTNVDTK.[K]		P04114	MS2
	[K].IEFISTMEGYK.[Y]		Q92820	WiMT
	[K].IDVHLVPDRK.[K]		P08603	MS2
	[K].IEGDEEMHCSDDGFWSK.[E]	1xCarbamidomethyl [C9]	P08603	MS2
	[K].IEGDHGARVVLVAVDK.[G]		P01024	MS2
	[K].LEGDSTDLSDQIAELQAQIAELK.[M]		P35579	MS2
	[R].LEGEACGVYTPR.[C]	1xCarbamidomethyl [C6]	P18065	MS2
	[R].LEGEVFFATR.[L]		P16112-2	WiMT
	[V].LEGNEQFINAAK.[I]		P07477; P07478	WiMT
	[K].IEGNLIFDPNNYLPK.[E]		P04114	MS2
	[K].IEGDEEMHCSDDGFWSK.[E]	1xCarbamidomethyl [C9]; 1xOxidation [M7]	P08603	MS2
	[KR].IDVCPENAEVTLTDFR.[A]	1xCarbamidomethyl [C4]	P35443; P49747	MS2
	[K].LDELRDEGK.[A]		P02768	MS2
	[K].LDELRDEGKASSAK.[Q]		P02768	MS2
	[R].IDEPGLR.[S]		P12955	MS2
	[K].LDFGNSQGK.[T]		O75223	WiMT
	[K].IDFLNNYALFLSPSAQQASWQVSAR.[F]		P04114	MS2
	[K].IDFSEFLSLLGDIATDYHK.[Q]		P31151	WiMT
	[K].LDFSSQADLR.[N]		P04114	WiMT
	[K].LDFSSQADLRNEIK.[T]		P04114	MS2
	[K].LDGCFSTPEER.[A]	1xCarbamidomethyl [C4]	P17050	WiMT
	[K].IDGDTIIFSNVQER.[S]		Q92823	WiMT
	[R].LDGEFWLGLEK.[I]		Q9Y5C1	WiMT
	[R].IDGEPCPGQFNPVEK.[W]	1xCarbamidomethyl [C6]	Q86WI1	WiMT
	[K].LDGGQLVWETLMDSR.[L]		Q7Z7M0	WiMT
	[R].LDGLCIPLR.[W]	1xCarbamidomethyl [C5]	Q07954	WiMT
	[K].IDDPTDSKPEDWDKPEHIPDPDAK.[K]		P27797	WiMT
	[K].LDGICWQVR.[Q]	1xCarbamidomethyl [C5]	P07360	MS2
	[K].IDDIWNLEVK.[E]		P04114	MS2
	[K].LDDGDYLCEDGCQNNCPACTPGQAQHYEGDR.[L]	4xCarbamidomethyl [C8; C12; C16; C19]	Q9Y6R7	WiMT
	[R].LCQDLGPGAFR.[L]	1xCarbamidomethyl [C2]	P08697	MS2
	[R].LCTDHGSQLVTITNR.[F]	1xCarbamidomethyl [C2]	Q9UBG0	WiMT
	[K].LCTVATLRETYGEMADCCAK.[Q]	3xCarbamidomethyl [C2; C17; C18]	P02768	MS2
	[K].LCTVATLRETYGEMADCCAK.[Q]	3xCarbamidomethyl [C2; C17; C18]; 1xOxidation [M14]	P02768	MS2
	[K].LCTVATLRETYGEMADCCAKQEPER.[N]	3xCarbamidomethyl [C2; C17; C18]	P02768	MS2
	[K].LCYVALDFEQEMATAASSSSLEK.[S]	1xCarbamidomethyl [C2]	P60709; P63261	MS2
	[K].IDAAQNWLADPNGGPEGEEQIR.[G]		P18206	WiMT
	[K].IDAVYEAPQEEK.[A]		P08253	WiMT
	[R].LDDCGLTEAR.[C]	1xCarbamidomethyl [C4]	P13489	WiMT
	[K].LDDDLEHQGGHVLDHGHK.[H]		P01042	MS2
	[K].LDDGHLNNSLSSPVQADVYFPR.[L]		Q3ZCW2	WiMT
	[R].LDGLDLVDTWK.[S]		P05186	WiMT
	[K].IDHVTGEIFSVAPLDR.[E]		Q12864	WiMT
	[R].IDLAVGDVVK.[T]		Q86UX7	MS2
	[K].IDRFMQAVTGWK.[T]		P01019	MS2
	[R].IDSLLENDR.[Q]		P10909-6	MS2
	[R].IDSLLENDRQQTHMLDVMQDHFSR.[A]		P10909-6	MS2
	[R].IDSLLENDRQQTHMLDVMQDHFSR.[A]	1xOxidation [M14]	P10909-6	WiMT
	[K].LDSLVAQQLQSK.[N]		Q9Y6R7	MS2
	[K].LDSTDFTGTIK.[L]		P02786	MS2
	[R].LDTLAQEVALLK.[E]		P05452	MS2
	[R].IDTINLFPATLFDAYMVAQNPGEWMLSCQNLNHLK.[A]	1xCarbamidomethyl [C28]	P00450	MS2
	[R].IDTINLFPATLFDAYMVAQNPGEWMLSCQNLNHLK.[A]	1xCarbamidomethyl [C28]; 1xOxidation [M]	P00450	MS2
	[K].IDTQDIEASHYR.[G]		P01031	MS2
	[R].LDTSRDGWHSWPIAHQWPQGPSAVDAAFSWEEK.[L]		P02790	MS2
	[R].LDRENISEYHLTAVIVDK.[D]		P33151	WiMT
	[K].IDQTVEELRR.[S]		P06727	MS2
	[K].IDQTVEELR.[R]		P06727	MS2
	[K].LDQIESVITATSANTQLVLETLAQMDDLQDFLSK.[D]	1xOxidation [M25]	P19823	MS2
	[R].LDLQEINNWVQAQMK.[G]		P36955	MS2
	[R].LDLQEINNWVQAQMK.[G]	1xOxidation [M14]	P36955	WiMT
	[K].LDNIYSSDK.[F]		P04114	MS2
	[K].LDPHLVLDQLR.[C]		P35579	MS2
	[R].LDVDQALNR.[S]		P04278	MS2
	[R].IDPSDSYTNYSPSFQGHVTISADK.[S]		A0A0J9YXX1	MS2
	[K].IDPSHTQGYR.[T]		P40189	WiMT
	[K].LDQGGAPLAGTNK.[E]		P05062	MS2
	[K].IDQLEGDHQLIQEALIFDNK.[H]		P12814	WiMT
	[K].LDQIESVITATSANTQLVLETLAQMDDLQDFLSK.[D]		P19823	MS2
	[K].IDPLEVEEGDPIVLPCNPPK.[G]	1xCarbamidomethyl [C16]	O00533	WiMT
	[K].LCPGGQLPFLLYGTEVHTDTNK.[I]	1xCarbamidomethyl [C2]	O00299	WiMT
	[K].IENCNYAVELGK.[NH]	1xCarbamidomethyl [C4]	P13796; P13797	WiMT
	[K].LENLEPEHEYK.[C]		P08575	WiMT
	[K].LGEVNTYAGDLQK.[K]		P06727	MS2
	[R].LGFTDLFSK.[W]		P29622	MS2
	[K].IGGAIEEVYVSLGVSVGK.[C]		P07358	WiMT
	[R].LGGPEAGLGEYLFER.[L]		P02792	MS2
	[K].LGGSPTSLGTWGSWIGPDHDK.[F]		P14314	WiMT
	[K].LGGSQEDQIK.[N]		P37837	WiMT
	[R].LGHLLHIRDEK.[K]		P80108	MS2
	[K].LGHPDTLNQGEFK.[E]		P06702	MS2
	[K].LGHPEALSAGTGSPQPPSFTYAQQR.[E]		Q15942	MS2
	[K].LGLDFPNLPYLIDGTHK.[I]		P28161	WiMT
	[L].LGEVDHYQLALGK.[F]		O75636	WiMT
	[R].IGESIELTCPK.[G]	1xCarbamidomethyl [C9]	P13671	MS2
	[R].IGDLQAFQGHGAGNLAGLK.[G]		P08195	WiMT
	[K].LGDNEETQVR.[T]		Q86TY3	WiMT
	[K].IGDNLRELQQR.[L]		P06727	WiMT
	[K].IGDNLRELQQRLEPYADQLR.[T]		P06727	WiMT
	[K].IGDQEFDHLPALLEFYK.[I]		P46109	WiMT
	[R].IGDTCDNNQDIDEDGHQNNLDNCPYVPNANQADHDK.[D]	2xCarbamidomethyl [C5; C23]	P07996	MS2
	[K].LGEASDFIVR.[Q]		O95980	WiMT
	[R].LGEFWLGNDNIHALTAQGTSELR.[V]		Q15485	MS2
	[R].LGEHNIEVLEGNEQFINAAK.[I]		P07477; P07478	MS2
	[K].IGEHTPSALAIMENANVLAR.[Y]		P04075	MS2
	[R].LGEPIPISK.[A]		P16930	WiMT
	[R].IGITNHDEYSLVR.[E]		Q9Y490	MS2
	[R].LGMFNIQHCK.[K]	1xCarbamidomethyl [C9]	P01009	MS2
	[R].LGMFNIQHCK.[K]	1xCarbamidomethyl [C9]; 1xOxidation [M3]	P01009	MS2
	[K].LGQYASPTAK.[R]		P0C0L4; P0C0L5	MS2
	[R].LGSLGAACEQTQTEGAK.[A]	1xCarbamidomethyl [C8]	P07357	MS2
	[K].LGSLQELFLDSNNISELPPQVFSQLFCLER.[L]	1xCarbamidomethyl [C27]	P22792	WiMT
	[R].LGTFEVEDQIEAAR.[Q]		P27487	WiMT
	[K].LGVIEDHSNR.[T]		P14625	MS2
	[R].LGVLTVTDTTPDSMR.[L]		P22105-1	WiMT
	[R].LGVLTVTDTTPDSMR.[L]	1xOxidation [M14]	P22105-1	WiMT
	[R].LGQSDPAPLQHQMDIYQK.[R]		P29401	WiMT
	[V].LGQLGITK.[V]		P01009	MS2
	[V].LGQEQDSYGGK.[F]		P02743	WiMT
	[R].LGMFNIQHCKK.[L]	1xCarbamidomethyl [C9]	P01009	MS2
	[R].LGMMVDLSHVSDAVAR.[R]		Q9H4A9	WiMT
	[K].LGNFPWQAFTSIHGR.[G]		Q9NZP8	MS2
	[K].LGNQEPGGQTALK.[S]		P08697	MS2
	[K].LGNWSAMPSCK.[A]	1xCarbamidomethyl [C10]	P02749	MS2
	[K].IGPDNLPYVQILK.[TVH]		P11362	WiMT
	[K].LGPEAFR.[F]		P33908	WiMT
	[R].LGPISADSTTAPLEK.[E]		P22105-1	WiMT
	[K].IGPITPLEFYR.[E]		Q13867	WiMT
	[R].LGPLVEQGR.[V]		P02649	MS2
	[R].LGPNYLHIPVNCPYR.[A]	1xCarbamidomethyl [C12]	P04040	MS2
	[R].IGQDGISTSATTNLK.[C]		P04114	MS2
	[K].LGPHAGDVEGHLSFLEK.[D]		P06727	MS2
	[K].LENGEIETIAR.[F]		Q9HDC9	MS2
	[K].LGDGFEGFYK.[S]		Q6P179	WiMT
	[K].LGCSLNQNSVPDIHGVEAPAR.[E]	1xCarbamidomethyl [C3]	Q14118	WiMT
	[R].LESEETMVLEAHDAQGDVPVTVTVHDFPGKK.[L]		P01024	WiMT
	[K].IESPGYLTSPGYPHSYHPSEK.[C]		O14786	WiMT
	[R].IESVLSSSGK.[R]		P17900	WiMT
	[K].IETISHEDLQR.[Q]		P07225	MS2
	[K].LETTVNYTDSQRPICLPSK.[G]	1xCarbamidomethyl [C15]	P03951	WiMT
	[R].LEVHYHNPLVIEGR.[N]		P09172	MS2
	[K].LEVLNFDFQANAQLSNPK.[I]		P04114	MS2
	[K].IEWLESHQDADIEDFK.[A]		P11021	MS2
	[K].LEWPLTEVAEGVFETEAPGGYK.[F]		Q9HC38-2	WiMT
	[K].LEYILTQTYDIEDLQPESLYGLAK.[Q]		Q92484	WiMT
	[K].LFAAFFLEMAQLH.[-]		Q96KN2	WiMT
	[R].LESEETMVLEAHDAQGDVPVTVTVHDFPGK.[K]	1xOxidation [M7]	P01024	MS2
	[R].IFDDFGTHYFTSGSLGGVYDLLYQFSSEELK.[N]		P13671	WiMT
	[R].LESEETMVLEAHDAQGDVPVTVTVHDFPGK.[K]		P01024	MS2
	[K].LESDVSAQMEYCR.[T]	1xCarbamidomethyl [C12]; 1xOxidation [M9]	P02675	MS2
	[R].LENNHAQLLR.[R]		O95810	WiMT
	[K].LEPGQPQLSPGISTIHLHPQFPVVIEK.[T]		Q14766	WiMT
	[R].LEPGQQEEYYR.[K]		P04180	MS2
	[R].LEPGQQEEYYRK.[L]		P04180	MS2
	[R].LEPYADQLR.[T]		P06727	MS2
	[K].LEQGENVFLQATDK.[N]		P02746	MS2
	[K].LESCGVTSDNCR.[D]	2xCarbamidomethyl [C4; C11]	P13489	WiMT
	[K].LESDVSAQMEYCR.[T]	1xCarbamidomethyl [C12]	P02675	MS2
	[K].LESDVSAQMEYCRTPCTVSCNIPVVSGK.[E]	3xCarbamidomethyl [C12; C16; C20]	P02675	MS2
	[K].LFDEINPETK.[L]		Q9UK55	MS2
	[K].LFDSDPITVTVPVEVSR.[K]		P10909-6	MS2
	[K].LFDSDPITVTVPVEVSRK.[N]		P10909-6	MS2
	[R].IFSPFADLSELSATGR.[N]		Q9UK55	MS2
	[K].IFSQETLTK.[A]		Q9UHG3	MS2
	[K].IFYNQQNHYDGSTGK.[F]		Q15848	MS2
	[K].LGAASLGAEDPETQVVLINAVK.[D]		Q9Y490	MS2
	[K].LGADAVGMSTVPEVIVAR.[H]	1xOxidation [M8]	P00491	WiMT
	[R].LGADMEDVCGR.[L]	1xCarbamidomethyl [C9]	P02649	MS2
	[R].LGADMEDVCGR.[L]	1xCarbamidomethyl [C9]; 1xOxidation [M5]	P02649	MS2
	[R].IGAEVYHNLK.[N]		P06733	MS2
	[K].LGALFQPDSFVHGNSGAGNNWAK.[G]		Q9H4B7	MS2
	[R].LGAVALYACDR.[G]	1xCarbamidomethyl [C9]	Q8TER0	WiMT
	[R].IGCGSHFCEK.[L]	2xCarbamidomethyl [C3; C8]	Q6UXB8	MS2
	[R].LFSLKPTSGPVLTVTLFGR.[L]		O95497	WiMT
	[K].LFQLMVEHTPDEESIDWTK.[I]		Q12907	WiMT
	[K].IFNIQLEDEGIYECEAENIR.[G]	1xCarbamidomethyl [C14]	Q12860	WiMT
	[R].IFELFEVGFLSPATFTVYEYHRPDK.[Q]		P01031	WiMT
	[R].LFENQLVGPESIAHIGDVMFTGTADGR.[V]		Q9HDC9	MS2
	[R].IFFESVYGQCK.[A]	1xCarbamidomethyl [C10]	Q9UGM5	MS2
	[R].IFFHLNAVALGDGGHYTCR.[Y]	1xCarbamidomethyl [C18]	P04217; P04217-2	MS2
	[K].IFFPGVSEFGK.[E]		P06276	MS2
	[R].LFFSQQQPEQLVPGPGPAPMPSDFQVLR.[A]		O95479	WiMT
	[K].LGDDLLQCHPAVK.[F]	1xCarbamidomethyl [C8]	P04070	MS2
	[K].IFFYDSENPPASEVLR.[I]		P27169	MS2
	[K].LFHTNFYDTVGTIQLINDHVK.[K]		P29622	MS2
	[R].LFLEPTQADIALLK.[L]		P08519	MS2
	[K].IFLMDLNEQNPR.[A]		Q15166	MS2
	[R].LFINVAPHAR.[I]		Q76LX8	WiMT
	[K].IFNGIPDWVYEEEMLATK.[Y]		Q12884	WiMT
	[K].IFNHCFTGNCVIDWLVSNQSVR.[N]	2xCarbamidomethyl [C5; C10]	P08567	WiMT
	[R].LFGSPLSDYYAYSPVR.[E]		O95479	WiMT
	[R].LCNTGDNSVCTTK.[T]	2xCarbamidomethyl [C2; C10]	P03952	MS2
	[R].LCNIEPDER.[C]	1xCarbamidomethyl [C2]	Q04756	MS2
	[K].KEDSCQLGYSAGPCMGMTSR.[Y]	2xCarbamidomethyl [C5; C14]; 1xOxidation [M]	P02760	MS2
	[K].KEDSCQLGYSAGPCMGMTSR.[Y]	2xCarbamidomethyl [C5; C14]; 2xOxidation [M15; M17]	P02760	WiMT
	[R].KFPSGTFEQVSQLVK.[E]		P02774	MS2
	[K].KGDTFSCMVGHEALPLAFTQK.[T]	1xCarbamidomethyl [C7]	P01876	MS2
	[K].KGDTFSCMVGHEALPLAFTQK.[T]	1xCarbamidomethyl [C7]; 1xOxidation [M8]	P01876	MS2
	[R].KGEVLPLPEANFPSFPLPHHK.[H]		P04196	MS2
	[R].KGEWVALNPLR.[K]		P08603	MS2
	[K].KGHIYQGSEADSVFSGFLIFPSA.[-]		P02745	WiMT
	[R].KGNVATEISTER.[D]		P04114	WiMT
	[RK].KHEAFESDLAAHQDR.[V]		P12814; O43707	WiMT
	[K].KEDSCQLGYSAGPCMGMTSR.[Y]	2xCarbamidomethyl [C5; C14]	P02760	MS2
	[K].KIDAAQNWLADPNGGPEGEEQIR.[G]		P18206	WiMT
	[K].KDPEGLFLQDNIVAEFSVDETGQMSATAK.[G]		P02753	MS2
	[K].HYYESEVLAMNFQDWATASR.[Q]		P08185	MS2
	[R].HYYIAAEEIIWNYAPSGIDIFTK.[E]		P00450	MS2
	[K].HYYIGIIETTWDYASDHGEK.[K]		P00450	MS2
	[K].HYYIGIIETTWDYASDHGEKK.[L]		P00450	WiMT
	[R].KAADDTWEPFASGK.[T]		P02766	WiMT
	[R].KAAISGENAGLVR.[A]		P19827	WiMT
	[R].KADGSYAAWLSR.[DG]		P0C0L4; P0C0L5	MS2
	[R].KAEEEHLGILGPQLHADVGDK.[V]		P00450	MS2
	[K].KALYLQYTDETFR.[T]		P00450	WiMT
	[R].KAPDAGGCLHADPDLGVLCPTGCQLQEALLQQERPIR.[N]	3xCarbamidomethyl [C8; C19; C23]	P02675	MS2
	[K].KATVVYQGER.[V]		P02749	MS2
	[K].KCDPTEVELDNQIVTATQSNICDEDSATETCYTYDR.[N]	3xCarbamidomethyl [C2; C22; C31]	P01591	MS2
	[K].KCDPTEVELDNQIVTATQSNICDEDSATETCYTYDRNK.[C]	3xCarbamidomethyl [C2; C22; C31]	P01591	MS2
	[K].KCSYTEDAQCIDGTIEVPK.[C]	2xCarbamidomethyl [C2; C10]	P02749	MS2
	[R].KDDIMLDEGMLQSLMELPDQYNYGMYAK.[F]		P07357	MS2
	[K].KIENCNYAVELGK.[NH]	1xCarbamidomethyl [C5]	P13796; P13797	MS2
	[K].KPGASVKVSCK.[AV]	1xCarbamidomethyl [C10]	A0A0C4DH29; P23083; P01743; P0DP01; A0A0C4DH33; A0A0C4DH31	MS2
	[K].KPGSSVKVSCK.[A]	1xCarbamidomethyl [C10]	P01742; A0A0B4J2H0	MS2
	[K].KPIIGILMQK.[C]	1xOxidation [M8]	Q92820	WiMT
	[K].KPLIGTVLAMDPDAAR.[H]		P33151	MS2
	[K].KPLIGTVLAMDPDAAR.[H]	1xOxidation [M10]	P33151	WiMT
	[K].KPLNTEGVMK.[S]		P00488	MS2
	[K].KPLNTEGVMK.[S]	1xOxidation [M9]	P00488	WiMT
	[R].KPIWLSQMSCSGR.[E]	1xCarbamidomethyl [C10]	O43866	MS2
	[K].KPQSAVYSTGSNGILLCEAEGEPQPTIK.[W]	1xCarbamidomethyl [C17]	O00533	WiMT
	[K].KPSLSVQPGPMVAPGESLTLQCVSDVGYDR.[F]	1xCarbamidomethyl [C22]	Q8N149	WiMT
	[K].KPSLSVQPGPVVAPGEK.[L]		Q8N6C8	WiMT
	[K].KPEDWDEEMDGEWEPPVIQNPEYK.[G]		P27797	WiMT
	[R].KPDVSHGEMVSGFGPIYNYKDTIVFK.[C]		P04003	MS2
	[R].KPDVSHGEMVSGFGPIYNYK.[D]	1xOxidation [M9]	P04003	MS2
	[R].KPDVSHGEMVSGFGPIYNYK.[D]		P04003	MS2
	[K].KIISDYHQQFR.[Y]		P04114	WiMT
	[K].KLISVDTEHSNIYLQNGPDR.[I]		P00450	WiMT
	[K].KLSFYYLIMAK.[G]		P01023	MS2
	[K].KLSSWVLLMK.[Y]		P01009	MS2
	[K].KLTISEQNIQR.[A]		P04114	MS2
	[K].KLVPFATELHER.[L]		P06727	MS2
	[K].KPAEDEWGK.[T]		P02792	WiMT
	[K].KPCDTSDPQCPPDGR.[Y]	2xCarbamidomethyl [C3; C10]	O95497	WiMT
	[K].KPDDITIDVTINESISHSR.[T]		Q9NPH3	WiMT
	[K].KPVAFSDYIHPVCLPDR.[E]	1xCarbamidomethyl [C13]	P00734	MS2
	[R].HYEGSTVPEK.[K]		P00738	MS2
	[R].HRQDWVDSGCPEESK.[E]	1xCarbamidomethyl [C10]	Q6UX71	WiMT
	[K].HRTGDEITYQCR.[N]	1xCarbamidomethyl [C11]	P08603	MS2
	[R].HSAQPWADFTLLGAR.[A]		Q8IYS5	WiMT
	[R].HSIFTPETNPR.[A]		P00747	MS2
	[K].HSLPDLPYDYGALEPHINAQIMQLHHSK.[H]		P04179	WiMT
	[R].HSIPVFCHSSFYHDTDFLGEELDIVAAK.[S]	1xCarbamidomethyl [C7]	P03951	WiMT
	[R].HSITNPLAVLCEFISQSIK.[S]	1xCarbamidomethyl [C11]	P04114	MS2
	[R].HSPQEAPHVQYER.[L]		P26992	WiMT
	[K].HSQAVEELAEQLEQTK.[R]		P35579	MS2
	[R].HSTFIPGTNK.[W]		P08519	MS2
	[K].HSTIFENLANK.[A]		P02787	MS2
	[K].HSTIFENLANKADRDQYELLCLDNTR.[K]	1xCarbamidomethyl [C21]	P02787	MS2
	[K].HSWTIPEDGNSQK.[T]		Q13201	WiMT
	[K].HRPQVAIICGSGLGGLTDK.[L]	1xCarbamidomethyl [C9]	P00491	WiMT
	[K].HRLEDMEQALSPSVFK.[A]	1xOxidation [M6]	P05155	MS2
	[R].HQIVEVAGDDK.[Y]		Q07960	WiMT
	[K].HQLYIDETVNSNIPTNLR.[V]		P02675	MS2
	[K].HQMDLVATLSQLGLQELFQAPDLR.[G]		P08697	MS2
	[K].HQMDLVATLSQLGLQELFQAPDLR.[G]	1xOxidation [M3]	P08697	MS2
	[K].HQNQWYTVCQTGWSLR.[A]	1xCarbamidomethyl [C9]	O43866	MS2
	[K].HQPQEFPTYVEPTNDEICEAFR.[K]	1xCarbamidomethyl [C18]	P02774	MS2
	[K].HQPQEFPTYVEPTNDEICEAFRK.[D]	1xCarbamidomethyl [C18]	P02774	MS2
	[R].HQQTVTIPPK.[S]		P01024	MS2
	[R].HQSPIDILDQYAR.[V]		P23470	WiMT
	[K].HQTVPQNTGGK.[N]		P02787	MS2
	[K].HRGVYSSDVFDIFPGTYQTLEMFPR.[T]		P00450	MS2
	[R].HRHPDEAAFFDTASTGK.[T]		P02671	MS2
	[K].HRHSITNPLAVLCEFISQSIK.[S]	1xCarbamidomethyl [C13]	P04114	WiMT
	[K].HRLEDMEQALSPSVFK.[A]		P05155	MS2
	[R].HRPELIDYGK.[L]		P12814	MS2
	[R].HSYTASYDIYDLNK.[R]		P27487	WiMT
	[K].HTAMVSWGGVSIPNSPFR.[V]		P21333	WiMT
	[R].HTASAWLMSAPNSGPHNR.[L]		Q96PD5	MS2
	[R].HVIILMTDGLHNMGGDPITVIDEIRDLLYIGK.[D]	1xOxidation [M]	P00751	WiMT
	[R].HVIPMNPNTNDLFNAVGDGIVLCK.[M]	1xCarbamidomethyl [C23]	P13796	WiMT
	[K].HVSSPLASYFLSFPYAR.[L]		P80108	MS2
	[K].HVVYPTAWMNQLPLLAAIEIQK.[A]		P43251	MS2
	[K].HVVYPTAWMNQLPLLAAIEIQK.[A]	1xOxidation [M9]	P43251	WiMT
	[R].HVYGELDVQIQR.[R]		P00488	MS2
	[K].HWAAAQSQCLPR.[Q]	1xCarbamidomethyl [C9]	O95479	WiMT
	[K].HWCEEGASSSSCSETYCGLYPESEPEVK.[A]	3xCarbamidomethyl [C3; C12; C17]	Q96IY4	MS2
	[R].HWLVTDIK.[G]		Q96S96	WiMT
	[K].HWPSEQDPEK.[A]		Q96NZ9	WiMT
	[K].HYCNHNEDAGVTCSDGSDLELR.[L]	2xCarbamidomethyl [C3; C13]	Q86VB7	WiMT
	[K].HYDGSYSTFGER.[Y]		P01023	MS2
	[R].HVIILMTDGLHNMGGDPITVIDEIR.[D]		P00751	WiMT
	[R].HVLAAWALGAK.[A]		P09172	WiMT
	[R].HTASAWLMSAPNSGPHNR.[L]	1xOxidation [M8]	Q96PD5	WiMT
	[R].HTFMGVVSLGSPSGEVSHPR.[K]		P02765	MS2
	[R].HTFMGVVSLGSPSGEVSHPR.[K]	1xOxidation [M4]	P02765	MS2
	[R].HTFMGVVSLGSPSGEVSHPRK.[T]		P02765	MS2
	[R].HTFMGVVSLGSPSGEVSHPRK.[T]	1xOxidation [M4]	P02765	MS2
	[R].HTFTLSLPR.[L]		P07333	WiMT
	[K].HTLNQIDEVK.[V]		P02765	MS2
	[R].HYGGLTGLNK.[A]		P18669	WiMT
	[K].HTNYTMEHIR.[V]		P12814; O43707	MS2
	[R].HTSLGPLEAK.[R]		P07357	MS2
	[K].HVEDVPAFQALGSLNDLQFFR.[Y]		P25311	MS2
	[K].HVEDVPAFQALGSLNDLQFFRYNSK.[D]		P25311	WiMT
	[R].HVGDLGNVTADK.[D]		P00441	MS2
	[K].HTNYTMEHIR.[V]	1xOxidation [M6]	P12814; O43707	WiMT
	[R].LCNNPTPQFGGK.[D]	1xCarbamidomethyl [C2]	P07996	MS2
	[K].KPVAFSDYIHPVCLPDRETAASLLQAGYK.[G]	1xCarbamidomethyl [C13]	P00734	MS2
	[K].KPWLAYPHYKPPEK.[C]		Q9UHG3	MS2
	[K].IAPPPVVSSGPFLFIK.[F]		O14786	WiMT
	[K].IAPQLSTEELVSLGEK.[M]		P43652	MS2
	[K].LAQAAQSSVATITR.[L]		Q9Y490	MS2
	[K].LAQDFLDSQNLSAYNTR.[L]		Q9NY33	WiMT
	[K].LAQKVPTADLEDVLPLAEDITNILSK.[C]		P02774	MS2
	[K].IAQLEEQLDNETK.[E]		P35579	MS2
	[K].IAQLPLTGSMSIIFFLPLK.[V]		P36955	WiMT
	[R].IAQLRPEDLAGLAALQELDVSNLSLQALPGDLSGLFPR.[L]		Q6EMK4	WiMT
	[R].IAQWQSFQLEGGLK.[Q]		P01023	MS2
	[R].IAQYYYTFK.[S]		P05160	MS2
	[K].LASDLLEWIR.[R]		P12814; O43707	MS2
	[R].LAPITSDPTEATAVGAVEASFK.[C]		P14618	MS2
	[R].LASLFPALFSR.[E]		Q9UNW1	WiMT
	[R].LAPLAEDVRGNLRGNTEGLQK.[S]		P06727	WiMT
	[R].LAPLAEDVR.[G]		P06727	MS2
	[R].IALGGLLFPASNLR.[L]		P04278	MS2
	[K].IAIIGAGIGGTSAAYYLR.[Q]		Q9UHG3	MS2
	[R].LAILGIHNEVSK.[I]		P12814	MS2
	[K].IAIPDFGTGAMENWGLITYR.[E]		Q07075	WiMT
	[K].LAIPQQSDFHNNR.[Y]		P07333	WiMT
	[K].LALWGEHTGQLYSK.[F]		P04114	MS2
	[K].LANDIEATAVR.[A]		O95479	WiMT
	[K].IANDNSLNHEYLPILGLAEFR.[S]		P17174	WiMT
	[R].IANLQTDLSDGLR.[L]		P21333	MS2
	[R].LANLTQGEDQYYLR.[V]		P10909-6	WiMT
	[K].IAPANADFAFR.[F]		P29622	MS2
	[K].IAPANADFAFRFYYLIASETPGK.[N]		P29622	WiMT
	[K].LAPGTIVEVWK.[D]		P07686	WiMT
	[R].LAPLAEDVRGNLR.[G]		P06727	MS2
	[R].LASPGFPGEYANDQER.[R]		O00187	MS2
	[R].LASPGFPGEYANDQERR.[W]		O00187	WiMT
	[R].LASPSEETWITCDNK.[I]	1xCarbamidomethyl [C12]	Q86VB7	WiMT
	[K].LCDNLSTK.[N]	1xCarbamidomethyl [C2]	P02774	MS2
	[K].ICDQWDNLGALTQK.[R]	1xCarbamidomethyl [C2]	P12814	MS2
	[R].LCENIAGHLK.[D]	1xCarbamidomethyl [C2]	P04040	WiMT
	[K].ICEPGYSPTYK.[Q]	1xCarbamidomethyl [C2]	P07858	WiMT
	[R].LCFFPFVENGHSESSGQTHLEGDTVQIICNTGYR.[L]	2xCarbamidomethyl [C2; C29]	P36980; Q03591	MS2
	[K].ICLDLQAPLYK.[K]	1xCarbamidomethyl [C2]	P02776	MS2
	[K].ICLDPDAPR.[I]	1xCarbamidomethyl [C2]	P02775	MS2
	[R].ICMDEDGNEK.[R]	1xCarbamidomethyl [C2]	P04275	MS2
	[K].LCMGSGLNLCEPNNK.[E]	2xCarbamidomethyl [C2; C10]	P02787	MS2
	[K].LCMGSGLNLCEPNNK.[E]	2xCarbamidomethyl [C2; C10]; 1xOxidation [M3]	P02787	MS2
	[K].LCMGSGLNLCEPNNKEGYYGYTGAFR.[C]	2xCarbamidomethyl [C2; C10]	P02787	MS2
	[R].LCNGVQDCMDGSDEGPHCR.[E]	3xCarbamidomethyl [C2; C8; C18]	Q07954	WiMT
	[K].ICAMEGLPQK.[H]	1xCarbamidomethyl [C2]; 1xOxidation [M4]	P43652	MS2
	[K].ICAMEGLPQK.[H]	1xCarbamidomethyl [C2]	P43652	MS2
	[K].LATALSLSNK.[F]		P04114	MS2
	[R].LATGSDDNCAAFFEGPPFK.[F]	1xCarbamidomethyl [C9]	O75083	WiMT
	[R].LATMMVQGQEYEAGGSVIHPLNLHMK.[R]		Q9UHG3	MS2
	[D].LATVYVDVLK.[D]		P02647	WiMT
	[K].IAVAAQNCYK.[V]	1xCarbamidomethyl [C8]	P60174-1	WiMT
	[R].IAVAQYSDDVK.[V]		P12111; P12111-4	WiMT
	[R].LAVTTHGLPCLAWASAQAK.[A]	1xCarbamidomethyl [C10]	P00734	MS2
	[R].LAVYQAGAR.[E]		P02649	MS2
	[K].IAWESPQGQVSR.[Y]		P02751-1	MS2
	[R].IAYGTQGSSGYSLR.[L]		P03952	MS2
	[R].LAYLQPALFSGLAELR.[E]		P35858	MS2
	[R].LAYQGQDTPEVLMDIGLR.[Q]		P30530	WiMT
	[K].LAVNMVPFPR.[L]		Q9H4B7; P07437	MS2
	[R].KPVEEYANCHLAR.[A]	1xCarbamidomethyl [C9]	P02787	MS2
	[R].LALETALMYGAK.[K]	1xOxidation [M8]	P00488	WiMT
	[K].KVPQVSTPTLVEVSRNLGK.[V]		P02768	MS2
	[K].KVTCTNAELVK.[G]	1xCarbamidomethyl [C4]	P01031	MS2
	[K].KWQEEMELYR.[Q]		P02647	MS2
	[K].KWQEEMELYR.[Q]	1xOxidation [M6]	P02647	MS2
	[K].KWQEEMELYRQK.[V]		P02647	MS2
	[K].KWQEEMELYRQK.[V]	1xOxidation [M6]	P02647	MS2
	[K].KWVMVPMMSLHHLTIPYFR.[D]		P01011	WiMT
	[K].KYEDEINKR.[T]		P35908; Q01546	MS2
	[K].KYLYEIARR.[H]		P02768	MS2
	[K].KYPVAHFIDQTLK.[A]		P05155	MS2
	[R].KYSDASDCHGEDSQAFCEK.[F]	2xCarbamidomethyl [C8; C17]	P01023	MS2
	[K].KYTHLSCDK.[V]	1xCarbamidomethyl [C7]	P05156	MS2
	[K].KVPQVSTPTLVEVSR.[N]		P02768	MS2
	[R].KYTYNYEAESSSGVPGTADSR.[S]		P04114	MS2
	[K].KVFLDCCNYITELRR.[Q]	2xCarbamidomethyl [C6; C7]	P01024	MS2
	[K].KVETNMAFSPFSIASLLTQVLLGAGENTK.[T]	1xOxidation [M6]	P05155	MS2
	[R].KPYNVESYTPQTQGK.[Y]		P07358	MS2
	[K].KQELEEICHDLEAR.[V]	1xCarbamidomethyl [C8]	P35579	MS2
	[K].KQELSEAEQATR.[T]		P01024	MS2
	[K].KQTALVELVK.[H]		P02768	MS2
	[K].KQTALVELVKHKPK.[A]		P02768	MS2
	[K].KREEAPSLRPAPPPISGGGYR.[A]		P02675	MS2
	[K].KSDVGFLPPFPTLDPEEK.[C]		P43652	MS2
	[K].KTDELPQLVTLPHPNLHGPEILDVPSTVQK.[T]		P02751-1	MS2
	[K].KTDPSGLSK.[T]		Q13740	WiMT
	[K].KTEEVECLTYGWSLTPK.[C]	1xCarbamidomethyl [C7]	P05160	MS2
	[K].KVEFVLK.[Q]		O75882	MS2
	[K].KVEGTAFVIFGIQDGEQR.[I]		P01024	MS2
	[K].KVEGTAFVIFGIQDGEQRISLPESLK.[R]		P01024	MS2
	[K].KVETNMAFSPFSIASLLTQVLLGAGENTK.[T]		P05155	MS2
	[K].KVFLDCCNYITELR.[R]	2xCarbamidomethyl [C6; C7]	P01024	MS2
	[K].LAAAVSNFGYDLYR.[V]		P36955	MS2
	[K].LAAAVSNFGYDLYRVR.[S]		P36955	WiMT
	[R].LAEYHAKATEHLSTLSEK.[A]		P02647	MS2
	[K].IAFSATR.[T]		P02746	MS2
	[R].LAGAPSEDPQFPK.[V]		O00391	MS2
	[R].LAGLGLQQLDEGLFSR.[L]		Q6EMK4	WiMT
	[K].LAGYLHTLVQNLVNNGYVR.[D]		P04180	WiMT
	[R].LAKTYETTLEK.[C]		P02768	MS2
	[K].IALALASR.[L]		Q9UJ14	WiMT
	[K].IAIANIIDEIIEK.[L]		P04114	MS2
	[K].LALDLEIATYR.[KT]		P08729; P04264; Q6KB66; P19013	MS2
	[K].LALDVEIATYR.[K]		Q5XKE5; P35908; P04259; P02538; Q01546; O95678; P13647	MS2
	[K].IAELSATAQEIIK.[S]		P04114	MS2
	[R].LAELPADALGPLQR.[A]		P35858	MS2
	[K].LAELEEALQK.[A]		P13647	MS2
	[K].LAEGFPLPLLK.[R]		P18428	MS2
	[K].LAACLEGNCAEGLGTNYR.[G]	2xCarbamidomethyl [C4; C9]	P00734	MS2
	[K].LAALNPESNTAGLDIFAK.[F]		O00299	WiMT
	[R].LAAYLMLMR.[S]		P04114	MS2
	[K].LAAYPPPEFQWYK.[D]		P35916-1	WiMT
	[K].LACDLNHAPCIQK.[A]	2xCarbamidomethyl [C3; C10]	Q6P179	WiMT
	[K].LACGAVLIHPSWVLTAAHCMDESK.[K]	2xCarbamidomethyl [C3; C19]	P04070	WiMT
	[R].LALETALMYGAK.[K]		P00488	MS2
	[R].LADDLYRYDVDTQMWTILK.[D]		O75882	MS2
	[K].LADFALLCLDGK.[R]	1xCarbamidomethyl [C8]	P02788	WiMT
	[K].IADFELPTIIVPEQTIEIPSIK.[F]		P04114	MS2
	[R].LADGGATNQGR.[V]		Q08380	MS2
	[R].IADVTSGLIGGEDGR.[V]		P80108	MS2
	[R].IAEFTTNLTEEEEK.[S]		P35579	MS2
	[R].IADAHLDR.[V]		P04196	MS2
	[K].LGYVTADGETSGSITCGK.[D]	1xCarbamidomethyl [C16]	P08603	MS2
	[K].LQDAEIAR.[L]		P06703	MS2
	[K].LQDFSDQLSDYYEK.[F]		P04114	MS2
	[R].LQDLYSIVR.[R]		P39060	WiMT
	[FK].LQDNELR.[HA]		Q6EMK4	MS2
	[K].LQEGGSVTMTCSSEGLPAPEIFWSK.[K]	1xCarbamidomethyl [C11]	P19320	WiMT
	[R].LQEGPTSCSGR.[V]	1xCarbamidomethyl [C8]	Q86VB7	WiMT
	[K].LQELHLSSNGLESLSPEFLRPVPQLR.[V]		P02750	MS2
	[K].LQETSNWLLSQQQADGSFQDLSPVIHR.[S]		P0C0L5	MS2
	[K].LQETSNWLLSQQQADGSFQDPCPVLDR.[S]	1xCarbamidomethyl [C22]	P0C0L4	MS2
	[K].IQCVDGEWTTLPTCVEQVK.[T]	2xCarbamidomethyl [C3; C14]	Q9BXR6	MS2
	[K].LQFAYLDNFK.[T]		Q8IWV2	WiMT
	[K].LQCDLQDPIVCLADHPR.[G]	2xCarbamidomethyl [C3; C11]	Q8IZP9	WiMT
	[R].LQAVTDDHIR.[M]		P30043	MS2
	[K].LPVVLANGQIR.[A]		Q9Y6R7	MS2
	[R].LPYSVVRNEQVEIR.[A]		P01024	MS2
	[R].LPYTIITTPPLK.[D]		P04114	MS2
	[R].IPYYNIHPMPVHLQQR.[L]		O95479	WiMT
	[R].LQAEAFQAR.[L]		P02649	MS2
	[R].LQAILGVPWK.[D]		P01019	MS2
	[K].IQALQQQADEAEDR.[A]		P67936	MS2
	[K].IQALQQQADEAEDRAQGLQR.[E]		P67936	MS2
	[R].IQALSLCSDQQSHLEFR.[V]	1xCarbamidomethyl [C7]	P07225	MS2
	[R].IQAQDPEFSDLNSAITYR.[I]		Q9HBB8	WiMT
	[R].IQCAAGYEQSEHNVCQDIDECTAGTHNCR.[A]	4xCarbamidomethyl [C3; C15; C21; C28]	Q12805	MS2
	[K].IQGQELSAYQAPSPPAHSGFHR.[Y]		Q96S96	MS2
	[K].LQGTLPVEAR.[E]		P01031	MS2
	[R].LQQELDDLLVDLDHQR.[Q]		P35579	MS2
	[K].LQQLLGR.[N]		Q96BZ4	WiMT
	[R].LQQVLHAGSGPCLPHLLSR.[L]	1xCarbamidomethyl [C12]	P08697	MS2
	[K].LQSGTHCLWTDQLLQGSEK.[G]	1xCarbamidomethyl [C7]	P01033	WiMT
	[K].LQSLFDSPDFSK.[I]		P36955	MS2
	[R].LQSIGTENTEENR.[R]		P04075	WiMT
	[R].LQSIGTENTEENRR.[F]		P04075	WiMT
	[K].LQSTTVMNPYMK.[L]		P04114	MS2
	[K].LQSTTVMNPYMK.[L]	1xOxidation [M]	P04114	MS2
	[K].LQSTTVMNPYMK.[L]	2xOxidation [M7; M11]	P04114	WiMT
	[K].IQTDREEHGPFCGK.[T]	1xCarbamidomethyl [C12]	O00187	WiMT
	[K].LQTVLEAVHDLLRPR.[G]		Q9HBI1-3	MS2
	[K].LQVELDNVTGLLSQSDSK.[S]		P35579	MS2
	[K].LQVEPAVDTSGVQCYGPGIEGQGVFR.[E]	1xCarbamidomethyl [C14]	P21333	MS2
	[K].IQPSGGTNINEALLR.[A]		P19823	MS2
	[K].LQGVEETNIELLVCNYEPPGNVK.[G]	1xCarbamidomethyl [C14]	Q6UXB8	WiMT
	[K].LQHLENELTHDIITK.[F]		P01009	MS2
	[K].LQHLENELTHDIITKFLENEDRR.[-S]		P01009	MS2
	[R].IQHPFTVEEFVLPK.[F]		P20742	MS2
	[K].LQLEQQVATGPALDNK.[K]		O15031	WiMT
	[R].LPVANPQACENWLR.[G]	1xCarbamidomethyl [C9]	P00736	MS2
	[K].LQILSLR.[D]		Q15404	MS2
	[R].IQLVEEELDR.[A]		P67936-2; P09493-5; P09493-8; P67936; P06753-2; P06753; P07951-2	MS2
	[R].IQLVEEELDRAQER.[L]		P67936-2; P09493-5; P09493-8; P67936; P06753-2; P06753; P07951-2	MS2
	[K].IQMYFEWSDGTPVTFTK.[W]		P22897	WiMT
	[K].IQNDCRDPPDYWTIHGLWPDK.[S]	1xCarbamidomethyl [C5]	O00584	WiMT
	[R].IQNILTEEPK.[V]		P27169	MS2
	[R].LQNNENNISCVER.[G]	1xCarbamidomethyl [C10]	P36980; Q03591	MS2
	[K].IQLSDYTK.[V]		P27487	WiMT
	[K].IQVLQQQADDAEER.[A]		P06753-2	MS2
	[D].LPSLAADFVESK.[D]		P02768	MS2
	[K].IPCSQPPQIEHGTINSSR.[S]	1xCarbamidomethyl [C3]	P08603	MS2
	[K].LPDATPTELAK.[L]		P02774	MS2
	[K].LPDTPQGLLGEAR.[M]		P17813	WiMT
	[R].IPEAPAGPPSDFGLFLSDDDPKK.[G]		Q9Y490	MS2
	[K].LPECEADDGCPKPPEIAHGYVEHSVR.[Y]	2xCarbamidomethyl [C4; C10]	P00738	MS2
	[K].LPECEADDGCPKPPEIAHGYVEHSVRYQCK.[N]	3xCarbamidomethyl [C4; C10; C29]	P00738	MS2
	[K].LPECEAVCGKPK.[N]	2xCarbamidomethyl [C4; C8]	P00739; P00738	MS2
	[K].LPEEIQR.[D]		P33908	MS2
	[K].IPEISIQDMTAQVTSPSGK.[T]		P21333	MS2
	[K].IPEPFPLPEDK.[S]		Q13508	WiMT
	[K].IPERSGAGTEDSACIPWAYYSTVDQVK.[D]	1xCarbamidomethyl [C14]	P00450	MS2
	[R].IPESGGDNSVFDIFELTGAAR.[K]		P07996	MS2
	[R].LPAVEPTDQAQYLCR.[A]	1xCarbamidomethyl [C14]	P98160	MS2
	[R].LPASHATWMGK.[I]	1xOxidation [M9]	P12955	WiMT
	[R].LNTDIAGLASAIDMSTNYNSDSLHFSNVFR.[S]		P04114	MS2
	[R].LNTDIAGLASAIDMSTNYNSDSLHFSNVFR.[S]	1xOxidation [M14]	P04114	WiMT
	[K].LNVAEVTQSEIGQK.[Q]		Q9HBI1-3	MS2
	[R].LNVEVDAAPTVDLNR.[V]		Q15323	WiMT
	[K].INVGGGLSGDHCK.[K]	1xCarbamidomethyl [C12]	P07357	MS2
	[K].INVNEIFYDLVR.[Q]		P61224	MS2
	[R].LNWEAPPGAFDSFLLR.[F]		P22105-1	WiMT
	[R].LNYPENGWTPGEDSYR.[E]		O14786	WiMT
	[R].IPACIAGER.[R]	1xCarbamidomethyl [C4]	P59665	MS2
	[R].IPADATALDVSHNLLR.[A]		P98161	WiMT
	[K].LPAPEPCVGMSCPPGWGHLDATSAGEK.[A]	2xCarbamidomethyl [C7; C12]	Q76LX8	WiMT
	[R].LPASHATWMGK.[I]		P12955	WiMT
	[R].LPETIDLGALYLSMK.[D]		P08567	WiMT
	[K].LPFPIIDDR.[N]		P30041	MS2
	[R].LPGDIQVVPIGVGPNANVQELER.[I]		P04275	WiMT
	[K].LPPNVVEESAR.[A]		P01023	MS2
	[R].LPPTTTCQQQK.[E]	1xCarbamidomethyl [C7]	P00751	MS2
	[R].IPQAQPGEEWLQVDLGTPK.[T]		O60462	WiMT
	[K].LPQPVQPDPVSHCK.[E]	1xCarbamidomethyl [C13]	P05556	MS2
	[K].LPQQANDYLNSFNWER.[Q]		P04114	MS2
	[K].IPQSQYDVVSDHVSK.[V]		P48357	WiMT
	[R].LPQVSPADSGEYVCR.[V]	1xCarbamidomethyl [C14]	P98160	WiMT
	[R].LPRPLPAVPGELTEATPNR.[Y]		P54802	WiMT
	[R].LPSEGPRPAHVVVGDVLQAADVDK.[T]		P30043	WiMT
	[K].IPSETLNR.[I]		Q15582	MS2
	[R].LPSGLPVSLLTLYLDNNK.[I]		P51884	MS2
	[R].LPSGSDHVMLK.[S]		P13591	WiMT
	[R].LPSGSDHVMLK.[S]	1xOxidation [M9]	P13591	WiMT
	[R].LPNTLKPDSYR.[V]		P15144	WiMT
	[K].LPNNVLQEKICAMEGLPQK.[H]	1xCarbamidomethyl [C11]	P43652	WiMT
	[K].LPNNVLQEK.[I]		P43652	MS2
	[R].IPNEGHISHFQGK.[Y]		O00533	WiMT
	[K].IPGIFELGISSQSDR.[G]		P07358	MS2
	[K].LPGIVAEGR.[D]		P01008	MS2
	[K].LPGIVAEGRDDLYVSDAFHK.[A]		P01008	MS2
	[K].IPGTCCDTCEEPECNDITAR.[L]	4xCarbamidomethyl [C5; C6; C9; C14]	P04275	MS2
	[R].LPGTYVVVLK.[E]		Q8NBP7	WiMT
	[R].IPIDDLTMVVYDPDK.[G]		Q9BYE9	WiMT
	[K].LPTDSELAPR.[S]		P49908	MS2
	[R].IPLENLQIIR.[G]		P00533	WiMT
	[R].LPLEYSYGEYR.[D]		P07358	MS2
	[R].IPLNDLFR.[C]		P13473	MS2
	[R].LPLVPALDGCLR.[R]	1xCarbamidomethyl [C10]	P04278	MS2
	[K].IPLVTNEECQK.[R]	1xCarbamidomethyl [C9]	P03951	MS2
	[R].IPIEDGSGEVVLSR.[K]		P01024	MS2
	[K].INSWVESQTNEK.[I]		P48594; P29508	WiMT
	[K].IQVLQQQADDAEERAER.[L]		P06753-2	WiMT
	[K].LSQLQTYMIQFDQYIK.[D]		P04114	MS2
	[K].LSQLQTYMIQFDQYIK.[D]	1xOxidation [M8]	P04114	WiMT
	[R].LSQLSVTDVTTSSLR.[L]		P22105-1	WiMT
	[R].LSQRFPKAEFAEVSK.[L]		P02768	MS2
	[R].ISQTYQQQYGR.[S]		P09525	WiMT
	[K].ISRLLDSLPSDTRLVLLNAIYLSAK.[W]		P05155	WiMT
	[K].ISSDLDGHPVPK.[Q]		P29401	WiMT
	[K].LSSDVCPTSDK.[S]	1xCarbamidomethyl [C6]	P11717	WiMT
	[R].LSSGLVTAALYGR.[L]		P43251	MS2
	[K].LSSPAVITDK.[V]		P00747	MS2
	[K].LSSSFIITQNMFCAGYDTK.[Q]	1xCarbamidomethyl [C13]	P00742	MS2
	[A].LSSVQESQVAQQAR.[G]		P02656	MS2
	[K].LSSVTAADTAVYYCAR.[-]	1xCarbamidomethyl [C14]	P06331; A0A075B6R2; P0DP08	MS2
	[R].LSQEDPDYGIR.[D]		P04040	WiMT
	[K].LSSVTAVDTAVYYCAR.[-]	1xCarbamidomethyl [C14]	A0A0C4DH34	MS2
	[K].LSPIYNLVPVK.[M]		P02748	MS2
	[K].LSPLGEEMRDR.[A]		P02647	MS2
	[K].LSITGTYDLK.[S]		P01009	MS2
	[R].LSMDGSPTR.[I]		P03952	MS2
	[R].LSMDIDVSYK.[H]		P01031	MS2
	[R].LSMDIDVSYK.[H]	1xOxidation [M3]	P01031	WiMT
	[K].ISMLEKIYIHPR.[Y]		P00734	WiMT
	[K].LSNDMMGSYAEMK.[F]		P04114	MS2
	[K].LSNDMMGSYAEMK.[F]	1xOxidation [M]	P04114	MS2
	[K].LSNDMMGSYAEMK.[F]	2xOxidation [M6; M]	P04114	WiMT
	[K].LSNDMMGSYAEMK.[F]	3xOxidation [M5; M6; M12]	P04114	WiMT
	[R].LSNENHGIAQR.[I]		P19823	MS2
	[K].ISNIPDEYFK.[R]		P51884	MS2
	[K].LSNNALSGLPQGVFGK.[L]		P22792	MS2
	[R].LSNRPAFMPSEGR.[M]		P12814	MS2
	[K].ISNSSDTVECECSENWK.[G]	2xCarbamidomethyl [C10; C12]	O75882	WiMT
	[R].ISNVEFYHSGQEGFR.[D]		Q86WI1	WiMT
	[K].LSPLGEEMRDRAR.[A]		P02647	MS2
	[K].LSSWVLLMK.[Y]		P01009	MS2
	[K].LSSWVLLMK.[Y]	1xOxidation [M8]	P01009	MS2
	[R].ISTGGGETEETLK.[K]		Q15063-5	WiMT
	[R].ITCAEEGWSPTPK.[C]	1xCarbamidomethyl [C3]	P36980	MS2
	[R].ITCSGDALPK.[KQ]	1xCarbamidomethyl [C3]	A0A075B6K4	MS2
	[R].ITCTEEGWSPTPK.[C]	1xCarbamidomethyl [C3]	Q9BXR6; Q03591	MS2
	[K].LTCTLSSGHSSYAIAWHQQQPEK.[G]	1xCarbamidomethyl [C3]	A0A075B6H9	MS2
	[R].LTDELAPPKPPLPEGEVPPPRPPPPEEK.[D]		P18206	MS2
	[R].ITDNMFCAGYKPDEGK.[R]	1xCarbamidomethyl [C7]	P00734	MS2
	[R].ITDNMFCAGYKPDEGK.[R]	1xCarbamidomethyl [C7]; 1xOxidation [M5]	P00734	MS2
	[R].ITDVIPSEAINELTVLVLVNTIYFK.[G]		P01008	MS2
	[R].LTEMETLQSQLMAEK.[L]		P35579	MS2
	[R].ITENDIQIALDDAK.[I]		P04114	MS2
	[K].ITEVALMGHLSCDTK.[E]	1xCarbamidomethyl [C12]	P04114	MS2
	[K].ITEVALMGHLSCDTK.[E]	1xCarbamidomethyl [C12]; 1xOxidation [M7]	P04114	MS2
	[K].ITAIITQGCK.[S]	1xCarbamidomethyl [C9]	P12259	MS2
	[R].LTAEIENAK.[C]		P78386	WiMT
	[I].LTAAHTLYPK.[E]		P00736	WiMT
	[R].ISYYSTPIAVGTVIR.[Y]		P20023-3	WiMT
	[K].ISTPPEAYWNR.[E]		Q9NY97	WiMT
	[K].ISTSLPVLDLIDAIQPGSINYDLLK.[T]		P13796	MS2
	[K].LSVLEEEQLPPGFPSIDMGPQLK.[V]		P10586	WiMT
	[R].ISVNNVLPVFDNLMQQK.[L]		P07339	WiMT
	[R].ISVTQPDSIVGIVAVDK.[S]		Q6YHK3	WiMT
	[R].ISISTSGGSFR.[N]		P13647	MS2
	[R].ISVYYNEATGGK.[Y]		P07437	MS2
	[R].LSWTVAQGPFDSFVVQYR.[D]		P22105-1	WiMT
	[R].ISYDAQFEVIK.[G]		P16284	WiMT
	[K].LSYTCEGGFR.[I]	1xCarbamidomethyl [C5]	P08603	MS2
	[K].LSYYDGMIQLNYR.[G]		P11717	WiMT
	[R].ISVYYNEAYGR.[K]		Q9H4B7	MS2
	[R].ISLQWLR.[R]		P27487	WiMT
	[K].LSLLMAESLR.[G]		Q8IXL6	WiMT
	[F].LSALEEYTK.[K]		P02647	MS2
	[R].ISASAEELR.[Q]		P06727	MS2
	[R].ISASAEELRQR.[L]		P06727	MS2
	[R].LSCAASGFTFDDYAMHWVR.[Q]	1xCarbamidomethyl [C3]	P0DP04	MS2
	[R].LSCAASGFTFDDYAMHWVR.[Q]	1xCarbamidomethyl [C3]; 1xOxidation [M15]	P0DP04	MS2
	[R].LSCAASGFTFSDHYMDWVR.[Q]	1xCarbamidomethyl [C3]	A0A0B4J1Y9	MS2
	[K].LSCAASGFTFSGSAMHWVR.[Q]	1xCarbamidomethyl [C3]	A0A0B4J1V6	MS2
	[R].LSCAASGFTFSNAWMSWVR.[Q]	1xCarbamidomethyl [C3]	A0A0B4J1V0	MS2
	[R].LSCAASGFTFSSYAMHWVR.[Q]	1xCarbamidomethyl [C3]	A0A075B6Q5	MS2
	[R].LSCAASGFTFSSYAMSWVR.[Q]	1xCarbamidomethyl [C3]	P01764	MS2
	[R].LSCAASGFTFSSYDMHWVR.[Q]	1xCarbamidomethyl [C3]	P01766	MS2
	[R].LSCAASGFTFSSYGMHWVR.[Q]	1xCarbamidomethyl [C3]	P01768	MS2
	[R].LSCAASGFTVSSNYMSWVR.[Q]	1xCarbamidomethyl [C3]	P01767	MS2
	[R].ISCPEGTNAYR.[S]	1xCarbamidomethyl [C3]	P05451; P48304	WiMT
	[R].LSAEDLVLEGAGLR.[V]		P11047	WiMT
	[S].ISCQEIPGQQSR.[G]	1xCarbamidomethyl [C3]	P27918	WiMT
	[K].IRYYTYLIMNK.[G]		P01024	MS2
	[R].IQYQLVDISQDNALRDEMR.[A]		Q9H299	MS2
	[R].IQYYCHEPYYK.[M]	1xCarbamidomethyl [C5]	P00736	MS2
	[K].IRAYYENSPQQVFSTEFEVK.[E]		P01024	MS2
	[R].LRDDVQSINWLR.[D]		P11362	WiMT
	[R].IREEGTDLEVTANR.[I]		P20742	MS2
	[K].LREQLGPVTQEFWDNLEK.[E]		P02647	MS2
	[K].IRLENEIQTYR.[S]		P13645	MS2
	[R].IRITDNMFCAGYKPDEGK.[R]	1xCarbamidomethyl [C9]	P00734	MS2
	[R].IRPHTFTGLSGLR.[R]		P35858	MS2
	[K].LRRELDESLQVAER.[L]		P10909-6	MS2
	[RK].LRTEGDGVYTLNDK.[K]		P00739; P00738	MS2
	[RK].LRTEGDGVYTLNDKK.[Q]		P00739; P00738	MS2
	[K].LRTEGDGVYTLNNEK.[Q]		P00738	MS2
	[K].LRYHGDPMPCPK.[E]	1xCarbamidomethyl [C10]	P09871	WiMT
	[K].LSCSYSHWSAPAPQCK.[A]	2xCarbamidomethyl [C3; C15]	P04003	MS2
	[K].LSGEAYGFVAR.[I]		P04275	WiMT
	[R].LSGNVLSYTFQVK.[I]		P10643	MS2
	[R].LSGSHSQGVAYPVR.[I]		P98160	WiMT
	[K].LSGSNPYTTVTPQIINSK.[W]		O43707	WiMT
	[R].ISGVGIDQPPYGIFVINQK.[T]		Q02413	WiMT
	[K].LSGVQDGHQDISLLYTEPGAGQTHTAASFR.[L]		P39060	WiMT
	[R].LSHNAIASLRPR.[T]		P35858	MS2
	[R].LSHPEWSSGYYWIDPNQGCTMDAIK.[V]	1xCarbamidomethyl [C19]	P08123	WiMT
	[K].LSLEIEQLELQR.[D]		P04003	MS2
	[K].LSLEIEQLELQRDSAR.[Q]		P04003	MS2
	[R].ISIEMHGTLEDQLSHLR.[Q]		P12814	WiMT
	[K].LSLESLTSYFSIESSTK.[G]		P04114	MS2
	[R].ISIGGGSCAISGGYGSR.[A]	1xCarbamidomethyl [C8]	P04259; P02538	MS2
	[K].LSGAYLVDDSDPDTSLFINVCR.[D]	1xCarbamidomethyl [C21]	P11717	WiMT
	[R].LSGALHVYSLGSD.[-]		P80108	MS2
	[K].LSFYYLIMAK.[G]	1xOxidation [M8]	P01023	MS2
	[K].LSFYYLIMAK.[G]		P01023	MS2
	[K].LSDLLAPISEQIK.[E]		Q01518	MS2
	[R].LSEAEFEVLK.[A]		P04275	MS2
	[R].LSEDVADVLLK.[L]		Q9HCL0	WiMT
	[K].LSEGASYLDHTFPAEK.[M]		P12259	WiMT
	[K].ISEGLPALEFPNEK.[-]		P02748	MS2
	[K].LSINTHPSQKPLSITVR.[T]		P01024	MS2
	[R].ISEITNIVSK.[L]		P20742	MS2
	[K].LSENTDFLAPGVSSFTDSNQQESITK.[R]		Q14515	WiMT
	[R].ISETSLPPDMYECLR.[V]	1xCarbamidomethyl [C13]	P51884	MS2
	[R].ISETSLPPDMYECLR.[V]	1xCarbamidomethyl [C13]; 1xOxidation [M10]	P51884	WiMT
	[K].LSFFCLAGYTTESGR.[Q]	1xCarbamidomethyl [C5]	P05160	MS2
	[K].LSFVKVDSHFR.[Q]		P01023	MS2
	[K].LSFVKVDSHFRQGIPFFGQVR.[L]		P01023	MS2
	[K].LSENNIQTIFAVTEEFQPVYK.[E]		P05556	WiMT
	[R].IGWPNAPILIQDFETLPR.[E]		P04275	MS2
	[K].LNSEGMEEAR.[N]		P07738	WiMT
	[K].LNQALLDLHALGSAR.[T]		P02792	MS2
	[R].LLEGEDAHLTQYK.[K]		Q04695	WiMT
	[R].ILEGFQPSGR.[F]		P80108	MS2
	[R].LIENGYFHPVK.[Q]		P05160	MS2
	[R].LLEPHCFPLSLVPTEFCPSPPALK.[D]	2xCarbamidomethyl [C6; C17]	P10643	MS2
	[K].LLETECPQYIR.[K]	1xCarbamidomethyl [C6]	P05109	MS2
	[K].LLETECPQYIRK.[K]	1xCarbamidomethyl [C6]	P05109	WiMT
	[K].LLETIDQLYLEYAK.[R]		P12814	WiMT
	[R].LLEYDTVTR.[E]		Q9HDC9	MS2
	[R].LLEGEDAHLSSSQFSSGSQSSR.[D]		P02533	MS2
	[R].LLFGSMTTPANWNSPLRPGEK.[Y]		Q13093	WiMT
	[R].LLEGEDAHLSSQQASGQSYSSR.[E]		P08779	WiMT
	[R].ILEDGSIYTTHDLILSSER.[K]		Q08554	WiMT
	[K].LLDNWDSVTSTFSK.[L]		P02647	MS2
	[K].LLDNWDSVTSTFSKLR.[E]		P02647	WiMT
	[R].LIDQYGTHYLQSGSLGGEYR.[V]		P10643	MS2
	[R].LLDSLPSDTR.[L]		P05155	MS2
	[K].LLDSSTVTHLFK.[I]		P60900	WiMT
	[K].LIDVISMYR.[E]		P04114	MS2
	[K].LIDVISMYR.[E]	1xOxidation [M7]	P04114	MS2
	[R].ILDWHVANTDK.[K]		P37837	WiMT
	[R].ILEAHQNVAQLSLAEAQLR.[F]		Q86UX7	MS2
	[R].ILEDMQEEDYLNFILFSGDVSTWK.[E]		Q06033	MS2
	[R].IIFHENYNAGTYQNDIALIEMK.[K]		P05156	MS2
	[R].IIFHENYNAGTYQNDIALIEMK.[K]	1xOxidation [M21]	P05156	WiMT
	[K].IIFVVGGPGSGK.[G]		P00568	WiMT
	[K].ILLANFLAQTEALMR.[G]		P06744	WiMT
	[K].ILLDEQAQWK.[H]		P13598	MS2
	[R].LLLFSDGNSQGATPAAIEK.[A]		P12109	WiMT
	[R].LLLFSPSVVHLGVPLSVGVQLQDVPR.[G]		P0C0L4; P0C0L5	MS2
	[R].LLLFSPSVVHLGVPLSVGVQLQDVPRGQVVK.[G]		P0C0L4; P0C0L5	WiMT
	[K].LLIGTVFHK.[AT]		P27169; Q15166	MS2
	[K].ILLMDLNEEDPTVLELGITGSK.[F]		P27169	MS2
	[K].ILLMDLNEEDPTVLELGITGSK.[F]	1xOxidation [M4]	P27169	WiMT
	[R].LLLPGIYTVSATAPGYDPETVTVTVGPAEPTLVNFHLK.[R]		P15169	WiMT
	[K].ILHLPTSWDWR.[N]		P53634	WiMT
	[R].LLGNVLVCVLAR.[N]	1xCarbamidomethyl [C8]	P02042	MS2
	[R].ILGEELGFASLHDLQLLGK.[L]		P04114	MS2
	[K].LLGELLQDNAK.[L]		P37837	WiMT
	[R].LLGEVDHYQLALGK.[F]		O75636	MS2
	[R].LLDLVFLLDGSSR.[L]		P04275	MS2
	[R].ILGGHLDAK.[G]		P00739; P00738	MS2
	[K].LLGIETPLPK.[K]		P05362	MS2
	[R].LLGMETMAWQEIR.[H]		P06681	MS2
	[R].LLGMETMAWQEIR.[H]	1xOxidation [M]	P06681	WiMT
	[R].LLGMETMAWQEIR.[H]	2xOxidation [M4; M7]	P06681	WiMT
	[R].LLGNVLVCVLAHHFGK.[E]	1xCarbamidomethyl [C8]	P68871	MS2
	[R].IIGGSDADIK.[N]		P09871	MS2
	[K].LLLPPTESGSESSITILK.[G]		O00533	WiMT
	[R].IIDGGSGYLCEMEPVAHFGLGK.[D]	1xCarbamidomethyl [C10]	Q9NQ79	WiMT
	[R].LHIMAGR.[VR]		Q5T013; P02790	MS2
	[K].LHMLELHCESK.[C]	1xCarbamidomethyl [C8]	O00533	WiMT
	[R].LHMLQISYFR.[D]		Q9UNN8	WiMT
	[R].LHQPVVLTDHVVPLCLPER.[T]	1xCarbamidomethyl [C15]	P08709	MS2
	[R].IHSGSFQSQVELSNDQEK.[A]		P04114	MS2
	[K].LHSLHLEGSCLGR.[I]	1xCarbamidomethyl [C10]	P35858	MS2
	[K].LHTDDELNWLDHGR.[T]		Q9Y490	MS2
	[K].LHTEAQIQEEGTVVELTGR.[Q]		P01023	MS2
	[K].LHTEAQIQEEGTVVELTGRQSSEITR.[T]		P01023	MS2
	[K].LHTLGDNLLDSR.[M]		P07942	WiMT
	[R].IHWESASLLR.[S]		P01024	MS2
	[R].IHWESASLLRSEETK.[E]		P01024	MS2
	[K].IHYLDTTTLIEPAPR.[Y]		P46109	WiMT
	[R].LKCASLQKFGER.[A]	1xCarbamidomethyl [C3]	P02768	MS2
	[R].LHLLNIGGSQDIHVVHFHGQTLLENGNK.[Q]		P12259	WiMT
	[K].LHLETDSLALVALGALDTALYAAGSK.[S]		P0C0L4; P0C0L5	MS2
	[R].IHALGPNYNLVISDLR.[M]		Q9UIB8	WiMT
	[R].LHDNQNGWSGDSAPVELILSDETLPAPEFSPEPESGR.[A]		P04217; P04217-2	MS2
	[R].LHEAFSPVSYQHDLALLR.[L]		P00748	MS2
	[K].LHELQEKLSPLGEEMR.[D]		P02647	WiMT
	[R].LHFFMPGFAPLTAQGSQQYR.[A]		Q9H4B7	MS2
	[R].LHFFMPGFAPLTSR.[G]		P07437	MS2
	[R].IHFPLATYAPVISAEK.[A]		P68363; P68366	MS2
	[K].LHGDCQDLQK.[Q]	1xCarbamidomethyl [C5]	P04275	WiMT
	[K].IHGILSNTHR.[Q]		Q6UX71	WiMT
	[K].LHIDDMEFEPK.[Q]		P19320	WiMT
	[K].LHIDEMDSVPTVR.[Q]	1xOxidation [M6]	P19320	WiMT
	[K].LHLDYIGPCK.[Y]	1xCarbamidomethyl [C9]	P09486	WiMT
	[R].LHLEGYHGTAGDSMSYHSGSVFSAR.[D]		P22105-1	WiMT
	[K].IHIGSSFEK.[Y]		Q96IY4	MS2
	[R].LKCDEWSVNSVGK.[I]	1xCarbamidomethyl [C3]	P02787	MS2
	[R].LKCDEWSVNSVGKIECVSAETTEDCIAK.[I]	3xCarbamidomethyl [C3; C16; C25]	P02787	MS2
	[K].ILATPPQEDAPSVDIANIR.[M]		P29401	WiMT
	[K].LLAVAATAPPDAPNREEVFDER.[A]		P18206	MS2
	[R].ILAVTDFEPTQAR.[M]		Q6P179	WiMT
	[R].LLCNGDNDCGDQSDEANCR.[R]	3xCarbamidomethyl [C3; C9; C18]	P07358	MS2
	[K].LICQATGFSPR.[Q]	1xCarbamidomethyl [C3]	P01871	MS2
	[R].LIDALESHHDTWPPACPPLEPAK.[L]	1xCarbamidomethyl [C16]	O00391	WiMT
	[R].ILDEEVFEGDIQQLLFVSDHR.[A]		P20908	WiMT
	[K].ILDELLQTCVDPEDCPVCEVAGR.[R]	3xCarbamidomethyl [C9; C15; C18]	P04275	MS2
	[R].LLATLCSAEVCQCAEGK.[C]	3xCarbamidomethyl [C6; C11; C13]	P0C0L4; P0C0L5	MS2
	[R].ILASTQFEPTAAR.[M]		Q9NZ08	WiMT
	[K].LIASMSSDSLR.[H]	1xOxidation [M5]	P00488	MS2
	[K].LIASMSSDSLR.[H]		P00488	MS2
	[K].LKPEDITQIQPQQLVLR.[L]		P05556	MS2
	[K].LKPVDGHCALESK.[Y]	1xCarbamidomethyl [C8]	Q14520	MS2
	[K].LLAALLEDEGGSGRPLLQAAK.[G]		Q9Y490	MS2
	[K].IIAATIENAQPILQIDNAR.[L]		P08779	MS2
	[R].LLAENNEIISNIR.[D]		Q16706	WiMT
	[R].LLDHRVPQTDMTFR.[H]		P04114	MS2
	[R].ILAGPAGDSNVVK.[L]		P04275	MS2
	[R].LIALLEVLSQK.[RK]		P21333; Q14315	MS2
	[K].LIALSIDSVEDHLAWSK.[D]		P30041	WiMT
	[K].LIALTLLGMGLALFR.[N]		P27169	WiMT
	[K].LIANTLCNSR.[Q]	1xCarbamidomethyl [C7]	Q14520	MS2
	[K].LIAPVAEEEATVPNNK.[I]		P07195	MS2
	[R].ILAQATSDLVNAIK.[A]		Q9Y490	MS2
	[R].INSDGSSTSYADSVK.[G]		A0A0B4J1X5	MS2
	[R].ILLQGTPVAQMTEDAVDAER.[L]	1xOxidation [M11]	P01024	MS2
	[R].IMGITLVSK.[K]	1xOxidation [M2]	Q9Y5Y7	WiMT
	[K].LMIEMDGTENK.[S]		P06733	WiMT
	[K].LMLLLEVISGER.[L]		P12814; O43707	WiMT
	[R].IMINFNPHFDLEDR.[D]		O14786	WiMT
	[K].LMIYEVSK.[R]	1xOxidation [M2]	P01709	MS2
	[K].LMIYEVSNRPSGVSNR.[F]		P01704	MS2
	[K].IMNGEADAMSLDGGFVYIAGK.[C]		P02787	MS2
	[K].IMNGEADAMSLDGGFVYIAGK.[C]	1xOxidation [M]	P02787	MS2
	[R].LMQCLPNPEDVK.[M]	1xCarbamidomethyl [C4]	P04003	MS2
	[R].LMQCLPNPEDVK.[M]	1xCarbamidomethyl [C4]; 1xOxidation [M2]	P04003	MS2
	[R].IMQSSQSMSK.[L]		O75882	MS2
	[R].IMQSSQSMSK.[L]	1xOxidation [M]	O75882	WiMT
	[R].IMQSSQSMSK.[L]	2xOxidation [M2; M8]	O75882	WiMT
	[R].LMTQDCLQQSR.[K]	1xCarbamidomethyl [C6]	P08709	MS2
	[K].IMADSGPIYDK.[T]	1xOxidation [M2]	P07996	MS2
	[R].LMTQDCLQQSR.[K]	1xCarbamidomethyl [C6]; 1xOxidation [M2]	P08709	WiMT
	[K].IMADSGPIYDK.[T]		P07996	MS2
	[R].IIYGGSVTGATCK.[E]	1xCarbamidomethyl [C12]	P60174-1	MS2
	[R].ILTSDVFQDCNK.[L]	1xCarbamidomethyl [C10]	P04275	MS2
	[R].ILTYQYGIPTSLQK.[T]		O43280	WiMT
	[K].LIVAMSSWLQK.[A]		P04114	MS2
	[K].LIVAMSSWLQK.[A]	1xOxidation [M5]	P04114	MS2
	[R].LIVHNGYCDGR.[S]	1xCarbamidomethyl [C8]	P02753	MS2
	[R].LLVPLLDGTECGVEK.[W]	1xCarbamidomethyl [C11]	Q76LX8	WiMT
	[K].LLVPSPEGMSEIYLR.[C]		Q86UX7	MS2
	[R].LLVVYPWTQR.[F]		P02042; P69891; P68871	MS2
	[R].LLVYYIVTGEQTAELVSDSVWLNIEEK.[C]		P01031	WiMT
	[LHRS].LIYAASSLQSGVPSR.[F]		A0A0C4DH73; P01599; P01601	MS2
	[R].LMVELHNLYR.[A]		Q6UXB8	WiMT
	[R].LMVELHNLYR.[A]	1xOxidation [M2]	Q6UXB8	WiMT
	[R].LNALREVQPVELPNCNLVK.[G]	1xCarbamidomethyl [C15]	P27169	MS2
	[K].LNHQLEGLTFQMK.[K]	1xOxidation [M12]	P06727	MS2
	[R].LNILNAK.[F]		P05546	MS2
	[K].LNILNNNYK.[I]		O14791	MS2
	[K].LNMGITDLQGLR.[L]		P0C0L4; P0C0L5	MS2
	[K].LNMGITDLQGLR.[L]	1xOxidation [M3]	P0C0L4; P0C0L5	MS2
	[K].LNNGEITQHR.[K]		P04003	MS2
	[K].LNNGEITQHRK.[S]		P04003	MS2
	[R].LNNGGSYNAWSVEK.[L]		P12259	WiMT
	[K].INNQLTLDSNTK.[Y]		P04114	MS2
	[R].INPDGSQSVVEVPYAR.[S]		Q9Y2B0	WiMT
	[K].LNPENLELEQTWETNIR.[K]		Q99972	WiMT
	[R].LNPGALLPVLTDPALNDLYVISTFK.[L]		P35443	WiMT
	[K].LNHQLEGLTFQMK.[K]		P06727	MS2
	[K].INHGILYDEEK.[Y]		P36980; Q03591	MS2
	[K].YYYAVYDMVVR.[G]		P07942	WiMT
	[R].LNAIYQNNLTK.[S]		P00390	WiMT
	[R].LNCEDIDECR.[T]	2xCarbamidomethyl [C3; C9]	Q12805	MS2
	[K].LNDLEDALQQAK.[E]		P04264	MS2
	[K].LNDLEDALQQAKEDLAR.[L]		P04264	WiMT
	[K].LNDLEEALQQAK.[E]		P35908	MS2
	[K].LNDLNSVLVMPTFHVPFTDLQVPSCK.[L]	1xCarbamidomethyl [C25]	P04114	MS2
	[R].LNEAAAGLNQAATELVQASR.[G]		Q9Y490	WiMT
	[K].LNECVDHTPK.[L]	1xCarbamidomethyl [C4]	P78417	WiMT
	[R].INENTGSVSVTR.[T]		P55290	MS2
	[K].LNFAVASR.[K]		P30101	WiMT
	[K].LNFNGEGEPEELMVDNWRPAQPLK.[N]		P00918	WiMT
	[R].LNGEIQALELPQK.[A]		P04114	MS2
	[K].LNDLNSVLVMPTFHVPFTDLQVPSCK.[L]	1xCarbamidomethyl [C25]; 1xOxidation [M10]	P04114	MS2
	[R].ILLQGTPVAQMTEDAVDAER.[L]		P01024	MS2
	[K].ILTATVDNANVLLQIDNAR.[L]		P02533	WiMT
	[K].LLIYDNNK.[R]		P01701	MS2
	[R].LLIYGASIR.[A]		A0A087WSY6	MS2
	[R].LLIYGASSR.[A]		P01619	MS2
	[K].LLIYGNSNRPSGVPDR.[F]		P01703	MS2
	[K].LLIYSASNLQSGVPSR.[F]		P0DSN7	MS2
	[K].LLIYSNNQRPSGVPDR.[F]		P01699; P01700	MS2
	[K].LLIYSNNQRPSGVPDRFSGSK.[S]		P01699; P01700	MS2
	[K].LLIYWASTR.[E]		P06312	MS2
	[K].ILNDDTALK.[E]		P54727	WiMT
	[K].LLIYDASSLESGVPSR.[F]		A0A0B4J2D9	MS2
	[K].LLNENSYVPR.[E]		P02786	MS2
	[R].LLIYDASNR.[A]		P04433	MS2
	[R].ILLQGTPVAQMTEDAVDAERLK.[H]		P01024	MS2
	[R].ILLQGTPVAQMTEDAVDAERLK.[H]	1xOxidation [M11]	P01024	MS2
	[K].LLLQMDSSATAYGSTVSK.[R]		P04114	MS2
	[K].LLLQMDSSATAYGSTVSK.[R]	1xOxidation [M5]	P04114	MS2
	[R].LLLQQVSLPELPGEYSMK.[V]		P01023	MS2
	[R].LLLQQVSLPELPGEYSMK.[V]	1xOxidation [M17]	P01023	MS2
	[K].ILISGLEPSTPYR.[F]		P22105-1	WiMT
	[K].ILLTEPPMNPTK.[N]		P61160	WiMT
	[R].LLLTSAPSLATSPAFR.[Y]		P54802	WiMT
	[K].LILVDYILFK.[G]		Q9UK55	MS2
	[K].LLIYAASSLQSGVPSR.[F]		A0A0C4DH73	MS2
	[K].LLIYAASTLQSGVPSR.[F]		A0A075B6S5; A0A0C4DH67	MS2
	[R].LLIYAVLPTGDVIGDSAK.[Y]		P01023	MS2
	[K].LLIYDASNLETGVPSR.[F]		P01593	MS2
	[R].IINEPTAAAIAYGLDK.[KRG]		P11142; P11021	MS2
	[R].IINEPTAAAIAYGLDR.[RT]		P0DMV9	WiMT
	[R].LLNLDGTCADSYSFVFSR.[D]	1xCarbamidomethyl [C8]	P02753	MS2
	[K].LLQLPLGFLYVHHTYVPAPPCTDFTR.[C]	1xCarbamidomethyl [C21]	Q96PD5	MS2
	[K].LIRDVWGIEGPIDAAFTR.[I]		P04004	MS2
	[R].IIRSSEDPNEDIVER.[N]		P01591	MS2
	[K].IISDYHQQFR.[Y]		P04114	MS2
	[K].ILSGDPYCEK.[D]	1xCarbamidomethyl [C8]	P43251	MS2
	[K].LLSGGNTLHLVSTTK.[T]		P04114	MS2
	[R].LLSGPYFWSLPSR.[F]		P98160	WiMT
	[K].LLSHCLLVTLAAHLPAEFTPAVHASLDK.[F]	1xCarbamidomethyl [C5]	P69905	MS2
	[K].IISNASCTTNCLAPLAK.[V]	2xCarbamidomethyl [C7; C11]	P04406	WiMT
	[R].LISPPVHLPR.[S]		O60462	WiMT
	[R].LISQIVSSITASLR.[F]		P68363; Q9H853; P68366	WiMT
	[K].LISVDTEHSNIYLQNGPDR.[I]		P00450	MS2
	[K].LISWYDNEFGYSNR.[V]		P04406	MS2
	[R].LLQEGQALEYVCPSGFYPYPVQTR.[T]	1xCarbamidomethyl [C12]	P00751	MS2
	[K].LIQEAPKPECEK.[A]	1xCarbamidomethyl [C10]	P20851	MS2
	[K].LLQDEFPGIPSPLDAAVECHRGECQAEGVLFFQGDR.[E]	2xCarbamidomethyl [C19; C24]	P02790	MS2
	[R].LLNLDGTCADSYSFVFSRDPNGLPPEAQK.[I]	1xCarbamidomethyl [C8]	P02753	WiMT
	[K].ILNIFGVIK.[G]		P02786	MS2
	[R].LLNIQTYCAGPAYLK.[G]	1xCarbamidomethyl [C8]	P22792	MS2
	[R].ILNNGHAFNVEFDDSQDK.[A]		P00918	WiMT
	[R].LLNNWDVCADMVGTFTDTEDPAK.[F]	1xCarbamidomethyl [C8]	P02753	MS2
	[R].LLNNWDVCADMVGTFTDTEDPAK.[F]	1xCarbamidomethyl [C8]; 1xOxidation [M11]	P02753	WiMT
	[K].LLNYNPEDPPGSEVLR.[I]		Q15166	MS2
	[R].LITLEEEMTK.[Y]		P07237	WiMT
	[R].LLPHANEVSQK.[I]		P06727	MS2
	[R].IIPHHNYNAAINK.[Y]		P00740	MS2
	[R].LLPVYELSGEHHDEEWSVK.[T]		Q9NZK5	WiMT
	[K].LLQCVDHSTHPDCALK.[S]	2xCarbamidomethyl [C4; C13]	Q10588	WiMT
	[K].LLQDEFPGIPSPLDAAVECHR.[G]	1xCarbamidomethyl [C19]	P02790	MS2
	[R].IIPGFMCQGGDFTR.[PH]	1xCarbamidomethyl [C7]	P62937	MS2
	[R].RGLQVALEEFHK.[H]		Q99969	WiMT
	[K].RGPGGAWAAEVISNAR.[E]		P0DJI9	MS2
	[K].VMYTQYEDESFTK.[H]	1xOxidation [M2]	P12259	WiMT
	[K].VNCLQTRAIPVTQYLK.[A]	1xCarbamidomethyl [C3]	P43652	WiMT
	[K].VNDDIIVNWVNETLR.[E]		P13796	WiMT
	[R].VNDFHCECR.[A]	2xCarbamidomethyl [C6; C8]	P46531	WiMT
	[S].VNDLYIQK.[Q]		P05546	WiMT
	[R].VNEPSILEMSR.[G]		O14791	MS2
	[R].VNFLASNIHYPSK.[K]		O95497	MS2
	[R].VNGSPVDNHPFAGDVVFPR.[E]		O00533	WiMT
	[R].VNGVLTALPVSVADGR.[I]		Q9Y6R7	WiMT
	[R].VNHVTLSQPK.[I]		P61769	MS2
	[K].VNKDDEEFIESNK.[M]		P00450	MS2
	[K].VNIPLVTNEECQK.[R]	1xCarbamidomethyl [C11]	P03952	MS2
	[K].VMYTQYEDESFTK.[H]		P12259	WiMT
	[R].VNPCIGGVILFHETLYQK.[A]	1xCarbamidomethyl [C4]	P04075	WiMT
	[K].VIVVGNPANTNCLTASK.[S]	1xCarbamidomethyl [C12]	P40925	WiMT
	[K].VIVVWNNIGEK.[A]		Q9UBQ6	WiMT
	[K].VLYDAEISQIHQSVTDTNVILSMDNSR.[N]		P35908	MS2
	[K].VLYDAEISQIHQSVTDTNVILSMDNSR.[N]	1xOxidation [M23]	P35908	MS2
	[R].VMAVDALASSHPLSTPASEINTPAQISELFDAISYSK.[G]		P15144	WiMT
	[K].VMDKYTFELSR.[R]		P02774	WiMT
	[R].VMLVNSMNTVK.[E]		P18206	WiMT
	[R].VMPICLPSKDYAEVGR.[V]	1xCarbamidomethyl [C5]	P00738	MS2
	[R].VMPICLPSKDYAEVGRVGYVSGWGR.[N]	1xCarbamidomethyl [C5]	P00738	MS2
	[R].VMTPAVYAPYDVK.[V]		O00533	WiMT
	[R].VMTPAVYAPYDVK.[V]	1xOxidation [M2]	O00533	WiMT
	[R].VMVTDFENVPEEDGTR.[F]		Q8NBP7	WiMT
	[K].VMVTNVTSLLK.[T]		Q9Y490	MS2
	[K].VNPSDCVDMVCDAK.[R]	2xCarbamidomethyl [C6; C11]	Q86WI1	WiMT
	[K].VNQIGSVTESIQACK.[L]	1xCarbamidomethyl [C14]	P13929	WiMT
	[R].VNQNLVYESGSLNFSK.[L]		P04114	MS2
	[R].VPGHEDGVTISGLEPDHK.[Y]		P22105-1	WiMT
	[R].VPGLHHTYDVLFLGTGDGR.[L]		Q9NPR2	WiMT
	[K].VPGLYYFTYHASSR.[G]		P02746	MS2
	[K].VPGLYYFVYHASHTANLCVLLYRSGVK.[V]	1xCarbamidomethyl [C18]	P02747	WiMT
	[K].VPHDLDMLLR.[A]		P55058	MS2
	[K].VPLALFALNR.[Q]		P12955	MS2
	[K].VPIDGPPIDIGR.[V]		P11717	WiMT
	[K].VPLDSSPATCHNNIMK.[Q]	1xCarbamidomethyl [C10]	P04275	MS2
	[K].VPLLLSEPINIIDALEMR.[D]		P04114	MS2
	[K].VPLLLSEPINIIDALEMR.[D]	1xOxidation [M17]	P04114	MS2
	[K].VPLQQNFQDNQFQGK.[W]		P80188	WiMT
	[R].VPMMLQDQEHHWYLHDR.[Y]		P29622	MS2
	[R].VPENTMHAMQQK.[L]		P12814	WiMT
	[R].VPEARPNSMVVEHPEFLK.[A]	1xOxidation [M9]	P06396	WiMT
	[K].VNSQSLSPYLFR.[A]		Q13103	MS2
	[K].VNVDAVGGEALGR.[L]		P02042	MS2
	[K].VNVDEVGGEALGR.[L]		P68871	MS2
	[R].VNVEDENHINIIR.[E]		P15086	WiMT
	[R].VNVGAGSHPNK.[V]		P21333	MS2
	[K].VNWEEEAASGLLTSLK.[D]		P04114	MS2
	[K].VLVQNAAGSQEK.[L]		Q9Y490	MS2
	[K].VNWIGCQGSEPHFR.[G]	1xCarbamidomethyl [C6]	O00391	MS2
	[R].VPAAYAGSLCGLCGNYNQDPADDLK.[A]	2xCarbamidomethyl [C10; C13]	Q9Y6R7	MS2
	[R].VPAGQSYFVDFGSTECSCPPGGGK.[I]	2xCarbamidomethyl [C16; C18]	P98095	WiMT
	[R].VPANLENVGFEVQTAEDDLK.[T]		P13671	MS2
	[R].VPAPPSPQPATYTCVVSHEDSR.[T]	1xCarbamidomethyl [C14]	P01880	MS2
	[K].VPDEHMIPIENLMNPR.[A]		Q07954	WiMT
	[K].VPDESEVVVER.[D]		Q08188	WiMT
	[R].VPEARPNSMVVEHPEFLK.[A]		P06396	MS2
	[R].VPMMLQDQEHHWYLHDR.[Y]	1xOxidation [M]	P29622	WiMT
	[K].VIVIPVGIGPHANLK.[Q]		P04275	MS2
	[R].VLTQIGTSIQDFIEAEDDLSSFR.[A]		Q15063-5	WiMT
	[R].VILDLTPNYR.[G]		P08195	WiMT
	[R].VLLDQLGTTISFER.[I]		P04114	MS2
	[K].VLLDWINDVLVEER.[I]		Q9HBI1-3	MS2
	[R].VLLEAGEGLVTITPTTGSDGRPDAR.[V]		Q9NY33	WiMT
	[R].VLLESIGSHEELTQDSR.[L]		Q12913	WiMT
	[K].VLIFQEENEIPASVFVK.[Q]		O95810	WiMT
	[K].VILGAHQEVNLEPHVQEIEVSR.[L]		P00747	MS2
	[R].VILGSEAAQQHPEEVR.[G]		Q9NY33	WiMT
	[K].VILPQTSDAYQVSVAK.[S]		Q86SQ4	WiMT
	[R].VIISAPSADAPMFVMGVNHEK.[Y]		P04406	WiMT
	[K].VIMDYESLEK.[A]		P00491	WiMT
	[K].VLMSVLNDNSR.[D]		P06681	MS2
	[K].VLMSVLNDNSR.[D]	1xOxidation [M3]	P06681	MS2
	[K].VLMSVLNDNSRDMTEVISSLENANYK.[D]		P06681	WiMT
	[R].VINLPLDSMAAPWETGDTFPDVVAIAPDVR.[A]		Q96PD5	MS2
	[K].VLLDGVQNPRAEDLVGK.[S]		P01024	MS2
	[R].VINLPLDSMAAPWETGDTFPDVVAIAPDVR.[A]	1xOxidation [M9]	Q96PD5	WiMT
	[K].VLLDGVQNPR.[A]		P01024	MS2
	[K].VLLAPLGDDFR.[Y]		Q16706	WiMT
	[K].VLEYLNDLK.[Q]		Q9UNW1	WiMT
	[R].VLFETDLVNPR.[G]		P14543	WiMT
	[K].VLGAFSDGLAHLDNLK.[G]		P02042; P68871	MS2
	[K].VLGEAMTGISQNAK.[N]		Q9Y490	MS2
	[R].VIGNMGQTMEQLTPELK.[S]		P04114	MS2
	[R].VIGNMGQTMEQLTPELK.[S]	1xOxidation [M]	P04114	MS2
	[K].VLGPPTPLILR.[N]		Q8IWV2	WiMT
	[R].VIGSGCNLDSAR.[F]	1xCarbamidomethyl [C6]	P07195; P00338	MS2
	[K].VLHFDQVTENTTEK.[A]		P48594	WiMT
	[K].VLHFDQVTENTTGK.[A]		P29508	WiMT
	[K].VLHGDLIDFVCK.[Q]	1xCarbamidomethyl [C11]	P05160	MS2
	[K].VLNQELR.[A]		P05090	MS2
	[R].VLNTEANVVR.[K]		O00391	MS2
	[R].VISGVLQLGNIVFK.[K]		P35579	MS2
	[K].VLSIAQAHSPAFSCEQVR.[A]	1xCarbamidomethyl [C14]	P08571	MS2
	[K].VLSLAQEQVGGSPEK.[L]		P0C0L4; P0C0L5	MS2
	[K].VLSNVESGFSLKPCALSEIGCHMNIFQHLAFSDVDVAR.[V]	2xCarbamidomethyl [C14; C21]	P03952	WiMT
	[K].VISTLEEPTPQCPTSQGR.[S]	1xCarbamidomethyl [C12]	P09172	MS2
	[R].VLSTLNVLVTPELLETGVECTASNDLGK.[N]	1xCarbamidomethyl [C20]	P43121	WiMT
	[K].VISTITNNIQQIIEIEDTFETLR.[A]		Q15582	WiMT
	[K].VLSYVDWIK.[G]		Q9NZP8	MS2
	[K].VITENVIVDCSHIQFLEMYGEMLAVSK.[L]	1xCarbamidomethyl [C10]	P80108	WiMT
	[K].VITEPIPVSDLR.[V]		Q12913	WiMT
	[R].VLTGNPRLDLQEINNWVQAQMK.[G]		P36955	WiMT
	[R].VLTHSELAPLR.[A]		Q14515	WiMT
	[R].VLTPDAFVCR.[T]	1xCarbamidomethyl [C9]	P03952	MS2
	[R].VLTPPMGTVMDVLK.[G]		Q15582	MS2
	[K].VLSALQAVQGLLVAQGR.[A]		P01019	MS2
	[R].VLRENADSLQASLRPHADELK.[A]		P06727	MS2
	[K].VIQYLAYVASSHK.[S]		P35579	MS2
	[K].VLNYVDWIK.[K]		P00736	MS2
	[K].VIPACLPSPNYVVADR.[T]	1xCarbamidomethyl [C5]	P00747	MS2
	[K].VIPACLPSPNYVVADRTECFITGWGETQGTFGAGLLK.[E]	2xCarbamidomethyl [C5; C19]	P00747	MS2
	[R].VLPAGLFAHTPCLVGLSLTHNQLETVAEGTFAHLSNLR.[S]	1xCarbamidomethyl [C12]	P22792	MS2
	[K].VLPDPEVISDLVFLK.[Q]		Q92859	WiMT
	[K].VLVDHFGYTK.[D]		P04114	MS2
	[K].VIPGPPALTLVPAELVR.[I]		P07333	WiMT
	[K].VLQAGSSRPWQEVLK.[D]		P12821	WiMT
[truncated: 7,366 more rows]

## Sheet: Table S7
	Table S7: Proteins identified in the analysis of MM pool and Primary tumor patients by MS2 and WiMT.
	Accession	Description	Gene	MM Pool	MM Primary tumor patients
	P04114	Apolipoprotein B-100 OS=Homo sapiens OX=9606 GN=APOB PE=1 SV=2	APOB	MS2	MS2
	P01024	Complement C3 OS=Homo sapiens OX=9606 GN=C3 PE=1 SV=2	C3	MS2	MS2
	P02768	Serum albumin OS=Homo sapiens OX=9606 GN=ALB PE=1 SV=2	ALB	MS2	MS2
	P0C0L5	Complement C4-B OS=Homo sapiens OX=9606 GN=C4B PE=1 SV=2	C4B	MS2	MS2
	P0C0L4	Complement C4-A OS=Homo sapiens OX=9606 GN=C4A PE=1 SV=2	C4A	MS2	MS2
	P01023	Alpha-2-macroglobulin OS=Homo sapiens OX=9606 GN=A2M PE=1 SV=3	A2M	MS2	MS2
	P02751-1	Isoform 1 of Fibronectin OS=Homo sapiens OX=9606 GN=FN1	FN1	MS2	MS2
	P00450	Ceruloplasmin OS=Homo sapiens OX=9606 GN=CP PE=1 SV=1	CP	MS2	MS2
	P02787	Serotransferrin OS=Homo sapiens OX=9606 GN=TF PE=1 SV=3	TF	MS2	MS2
	P01031	Complement C5 OS=Homo sapiens OX=9606 GN=C5 PE=1 SV=4	C5	MS2	MS2
	P08603	Complement factor H OS=Homo sapiens OX=9606 GN=CFH PE=1 SV=4	CFH	MS2	MS2
	P00747	Plasminogen OS=Homo sapiens OX=9606 GN=PLG PE=1 SV=2	PLG	MS2	MS2
	Q14624	Inter-alpha-trypsin inhibitor heavy chain H4 OS=Homo sapiens OX=9606 GN=ITIH4 PE=1 SV=4	ITIH4	MS2	MS2
	P19827	Inter-alpha-trypsin inhibitor heavy chain H1 OS=Homo sapiens OX=9606 GN=ITIH1 PE=1 SV=3	ITIH1	MS2	MS2
	P21333	Filamin-A OS=Homo sapiens OX=9606 GN=FLNA PE=1 SV=4	FLNA	MS2	MS2
	P02675	Fibrinogen beta chain OS=Homo sapiens OX=9606 GN=FGB PE=1 SV=2	FGB	MS2	MS2
	P02671	Fibrinogen alpha chain OS=Homo sapiens OX=9606 GN=FGA PE=1 SV=2	FGA	MS2	MS2
	P00734	Prothrombin OS=Homo sapiens OX=9606 GN=F2 PE=1 SV=2	F2	MS2	MS2
	Q9Y490	Talin-1 OS=Homo sapiens OX=9606 GN=TLN1 PE=1 SV=3	TLN1	MS2	MS2
	P19823	Inter-alpha-trypsin inhibitor heavy chain H2 OS=Homo sapiens OX=9606 GN=ITIH2 PE=1 SV=2	ITIH2	MS2	MS2
	P00751	Complement factor B OS=Homo sapiens OX=9606 GN=CFB PE=1 SV=2	CFB	MS2	MS2
	P04275	von Willebrand factor OS=Homo sapiens OX=9606 GN=VWF PE=1 SV=4	VWF	MS2	MS2
	P01011	Alpha-1-antichymotrypsin OS=Homo sapiens OX=9606 GN=SERPINA3 PE=1 SV=2	SERPINA3	MS2	MS2
	P02774	Vitamin D-binding protein OS=Homo sapiens OX=9606 GN=GC PE=1 SV=2	GC	MS2	MS2
	P01008	Antithrombin-III OS=Homo sapiens OX=9606 GN=SERPINC1 PE=1 SV=1	SERPINC1	MS2	MS2
	P02647	Apolipoprotein A-I OS=Homo sapiens OX=9606 GN=APOA1 PE=1 SV=1	APOA1	MS2	MS2
	Q9Y6R7	IgGFc-binding protein OS=Homo sapiens OX=9606 GN=FCGBP PE=1 SV=3	FCGBP	MS2	MS2
	P12814	Alpha-actinin-1 OS=Homo sapiens OX=9606 GN=ACTN1 PE=1 SV=2	ACTN1	MS2	MS2
	P02790	Hemopexin OS=Homo sapiens OX=9606 GN=HPX PE=1 SV=2	HPX	MS2	MS2
	P43652	Afamin OS=Homo sapiens OX=9606 GN=AFM PE=1 SV=1	AFM	MS2	MS2
	P02679	Fibrinogen gamma chain OS=Homo sapiens OX=9606 GN=FGG PE=1 SV=3	FGG	MS2	MS2
	O75882	Attractin OS=Homo sapiens OX=9606 GN=ATRN PE=1 SV=2	ATRN	MS2	MS2
	P04217	Alpha-1B-glycoprotein OS=Homo sapiens OX=9606 GN=A1BG PE=1 SV=4	A1BG	MS2	MS2
	Q96PD5	N-acetylmuramoyl-L-alanine amidase OS=Homo sapiens OX=9606 GN=PGLYRP2 PE=1 SV=1	PGLYRP2	MS2	MS2
	P06396	Gelsolin OS=Homo sapiens OX=9606 GN=GSN PE=1 SV=1	GSN	MS2	MS2
	P20742	Pregnancy zone protein OS=Homo sapiens OX=9606 GN=PZP PE=1 SV=4	PZP	MS2	MS2
	P06727	Apolipoprotein A-IV OS=Homo sapiens OX=9606 GN=APOA4 PE=1 SV=3	APOA4	MS2	MS2
	P05546	Heparin cofactor 2 OS=Homo sapiens OX=9606 GN=SERPIND1 PE=1 SV=3	SERPIND1	MS2	MS2
	P09871	Complement C1s subcomponent OS=Homo sapiens OX=9606 GN=C1S PE=1 SV=1	C1S	MS2	MS2
	P10643	Complement component C7 OS=Homo sapiens OX=9606 GN=C7 PE=1 SV=2	C7	MS2	MS2
	P13671	Complement component C6 OS=Homo sapiens OX=9606 GN=C6 PE=1 SV=3	C6	MS2	MS2
	P00738	Haptoglobin OS=Homo sapiens OX=9606 GN=HP PE=1 SV=1	HP	MS2	MS2
	P07358	Complement component C8 beta chain OS=Homo sapiens OX=9606 GN=C8B PE=1 SV=3	C8B	MS2	MS2
	P01857	Immunoglobulin heavy constant gamma 1 OS=Homo sapiens OX=9606 GN=IGHG1 PE=1 SV=1	IGHG1	MS2	MS2
	P05160	Coagulation factor XIII B chain OS=Homo sapiens OX=9606 GN=F13B PE=1 SV=3	F13B	MS2	MS2
	P04003	C4b-binding protein alpha chain OS=Homo sapiens OX=9606 GN=C4BPA PE=1 SV=2	C4BPA	MS2	MS2
	P01009	Alpha-1-antitrypsin OS=Homo sapiens OX=9606 GN=SERPINA1 PE=1 SV=3	SERPINA1	MS2	MS2
	P01042	Kininogen-1 OS=Homo sapiens OX=9606 GN=KNG1 PE=1 SV=2	KNG1	MS2	MS2
	P12259	Coagulation factor V OS=Homo sapiens OX=9606 GN=F5 PE=1 SV=4	F5	MS2	MS2
	P18206	Vinculin OS=Homo sapiens OX=9606 GN=VCL PE=1 SV=4	VCL	MS2	MS2
	P01859	Immunoglobulin heavy constant gamma 2 OS=Homo sapiens OX=9606 GN=IGHG2 PE=1 SV=2	IGHG2	MS2	MS2
	P01876	Immunoglobulin heavy constant alpha 1 OS=Homo sapiens OX=9606 GN=IGHA1 PE=1 SV=2	IGHA1	MS2	MS2
	P00736	Complement C1r subcomponent OS=Homo sapiens OX=9606 GN=C1R PE=1 SV=2	C1R	MS2	MS2
	P06681	Complement C2 OS=Homo sapiens OX=9606 GN=C2 PE=1 SV=2	C2	MS2	MS2
	P02760	Protein AMBP OS=Homo sapiens OX=9606 GN=AMBP PE=1 SV=1	AMBP	MS2	MS2
	P22105-1	Isoform 3 of Tenascin-X OS=Homo sapiens OX=9606 GN=TNXB	TNXB	MS2	MS2
	Q06033	Inter-alpha-trypsin inhibitor heavy chain H3 OS=Homo sapiens OX=9606 GN=ITIH3 PE=1 SV=2	ITIH3	MS2	MS2
	P01871	Immunoglobulin heavy constant mu OS=Homo sapiens OX=9606 GN=IGHM PE=1 SV=4	IGHM	MS2	MS2
	P04264	Keratin, type II cytoskeletal 1 OS=Homo sapiens OX=9606 GN=KRT1 PE=1 SV=6	KRT1	MS2	MS2
	P05155	Plasma protease C1 inhibitor OS=Homo sapiens OX=9606 GN=SERPING1 PE=1 SV=2	SERPING1	MS2	MS2
	P35908	Keratin, type II cytoskeletal 2 epidermal OS=Homo sapiens OX=9606 GN=KRT2 PE=1 SV=2	KRT2	MS2	MS2
	P05156	Complement factor I OS=Homo sapiens OX=9606 GN=CFI PE=1 SV=2	CFI	MS2	MS2
	P10909-6	Isoform 6 of Clusterin OS=Homo sapiens OX=9606 GN=CLU	CLU	MS2	MS2
	P02765	Alpha-2-HS-glycoprotein OS=Homo sapiens OX=9606 GN=AHSG PE=1 SV=2	AHSG	MS2	MS2
	P35527	Keratin, type I cytoskeletal 9 OS=Homo sapiens OX=9606 GN=KRT9 PE=1 SV=3	KRT9	MS2	MS2
	P09172	Dopamine beta-hydroxylase OS=Homo sapiens OX=9606 GN=DBH PE=1 SV=3	DBH	MS2	MS2
	Q16610	Extracellular matrix protein 1 OS=Homo sapiens OX=9606 GN=ECM1 PE=1 SV=2	ECM1	MS2	MS2
	P13645	Keratin, type I cytoskeletal 10 OS=Homo sapiens OX=9606 GN=KRT10 PE=1 SV=6	KRT10	MS2	MS2
	P00488	Coagulation factor XIII A chain OS=Homo sapiens OX=9606 GN=F13A1 PE=1 SV=4	F13A1	MS2	MS2
	P01860	Immunoglobulin heavy constant gamma 3 OS=Homo sapiens OX=9606 GN=IGHG3 PE=1 SV=2	IGHG3	MS2	MS2
	P23142	Fibulin-1 OS=Homo sapiens OX=9606 GN=FBLN1 PE=1 SV=4	FBLN1	MS2	MS2
	P07357	Complement component C8 alpha chain OS=Homo sapiens OX=9606 GN=C8A PE=1 SV=2	C8A	MS2	MS2
	P35858	Insulin-like growth factor-binding protein complex acid labile subunit OS=Homo sapiens OX=9606 GN=IGFALS PE=1 SV=1	IGFALS	MS2	MS2
	P01019	Angiotensinogen OS=Homo sapiens OX=9606 GN=AGT PE=1 SV=1	AGT	MS2	MS2
	P07996	Thrombospondin-1 OS=Homo sapiens OX=9606 GN=THBS1 PE=1 SV=2	THBS1	MS2	MS2
	P03952	Plasma kallikrein OS=Homo sapiens OX=9606 GN=KLKB1 PE=1 SV=1	KLKB1	MS2	MS2
	Q86VB7	Scavenger receptor cysteine-rich type 1 protein M130 OS=Homo sapiens OX=9606 GN=CD163 PE=1 SV=2	CD163	MS2	MS2
	P80108	Phosphatidylinositol-glycan-specific phospholipase D OS=Homo sapiens OX=9606 GN=GPLD1 PE=1 SV=3	GPLD1	MS2	MS2
	P08697	Alpha-2-antiplasmin OS=Homo sapiens OX=9606 GN=SERPINF2 PE=1 SV=3	SERPINF2	MS2	MS2
	P01861	Immunoglobulin heavy constant gamma 4 OS=Homo sapiens OX=9606 GN=IGHG4 PE=1 SV=1	IGHG4	MS2	MS2
	P04004	Vitronectin OS=Homo sapiens OX=9606 GN=VTN PE=1 SV=1	VTN	MS2	MS2
	P04196	Histidine-rich glycoprotein OS=Homo sapiens OX=9606 GN=HRG PE=1 SV=1	HRG	MS2	MS2
	P02748	Complement component C9 OS=Homo sapiens OX=9606 GN=C9 PE=1 SV=2	C9	MS2	MS2
	P60709	Actin, cytoplasmic 1 OS=Homo sapiens OX=9606 GN=ACTB PE=1 SV=1	ACTB	MS2	MS2
	P29622	Kallistatin OS=Homo sapiens OX=9606 GN=SERPINA4 PE=1 SV=3	SERPINA4	MS2	MS2
	Q07954	Prolow-density lipoprotein receptor-related protein 1 OS=Homo sapiens OX=9606 GN=LRP1 PE=1 SV=2	LRP1	WiMT	WiMT
	P02766	Transthyretin OS=Homo sapiens OX=9606 GN=TTR PE=1 SV=1	TTR	MS2	MS2
	P63261	Actin, cytoplasmic 2 OS=Homo sapiens OX=9606 GN=ACTG1 PE=1 SV=1	ACTG1	WiMT	MS2
	P49747	Cartilage oligomeric matrix protein OS=Homo sapiens OX=9606 GN=COMP PE=1 SV=2	COMP	MS2	MS2
	P06276	Cholinesterase OS=Homo sapiens OX=9606 GN=BCHE PE=1 SV=1	BCHE	MS2	MS2
	O00533	Neural cell adhesion molecule L1-like protein OS=Homo sapiens OX=9606 GN=CHL1 PE=1 SV=4	CHL1	MS2	MS2
	P27797	Calreticulin OS=Homo sapiens OX=9606 GN=CALR PE=1 SV=1	CALR	WiMT	MS2
	P00748	Coagulation factor XII OS=Homo sapiens OX=9606 GN=F12 PE=1 SV=3	F12	MS2	MS2
	P98160	Basement membrane-specific heparan sulfate proteoglycan core protein OS=Homo sapiens OX=9606 GN=HSPG2 PE=1 SV=4	HSPG2	MS2	MS2
	P25311	Zinc-alpha-2-glycoprotein OS=Homo sapiens OX=9606 GN=AZGP1 PE=1 SV=2	AZGP1	MS2	MS2
	P15144	Aminopeptidase N OS=Homo sapiens OX=9606 GN=ANPEP PE=1 SV=4	ANPEP	MS2	MS2
	O43707	Alpha-actinin-4 OS=Homo sapiens OX=9606 GN=ACTN4 PE=1 SV=2	ACTN4	WiMT	WiMT
	P13796	Plastin-2 OS=Homo sapiens OX=9606 GN=LCP1 PE=1 SV=6	LCP1	MS2	MS2
	P48740	Mannan-binding lectin serine protease 1 OS=Homo sapiens OX=9606 GN=MASP1 PE=1 SV=3	MASP1	MS2	MS2
	P27169	Serum paraoxonase/arylesterase 1 OS=Homo sapiens OX=9606 GN=PON1 PE=1 SV=3	PON1	MS2	MS2
	P36955	Pigment epithelium-derived factor OS=Homo sapiens OX=9606 GN=SERPINF1 PE=1 SV=4	SERPINF1	MS2	MS2
	P11717	Cation-independent mannose-6-phosphate receptor OS=Homo sapiens OX=9606 GN=IGF2R PE=1 SV=3	IGF2R	WiMT	WiMT
	P03951	Coagulation factor XI OS=Homo sapiens OX=9606 GN=F11 PE=1 SV=1	F11	MS2	MS2
	P08519	Apolipoprotein(a) OS=Homo sapiens OX=9606 GN=LPA PE=1 SV=1	LPA	MS2	MS2
	O00391	Sulfhydryl oxidase 1 OS=Homo sapiens OX=9606 GN=QSOX1 PE=1 SV=3	QSOX1	MS2	MS2
	P22792	Carboxypeptidase N subunit 2 OS=Homo sapiens OX=9606 GN=CPN2 PE=1 SV=3	CPN2	MS2	MS2
	P00739	Haptoglobin-related protein OS=Homo sapiens OX=9606 GN=HPR PE=2 SV=2	HPR	MS2	MS2
	P01834	Immunoglobulin kappa constant OS=Homo sapiens OX=9606 GN=IGKC PE=1 SV=2	IGKC	MS2	MS2
	P26927	Hepatocyte growth factor-like protein OS=Homo sapiens OX=9606 GN=MST1 PE=1 SV=2	MST1	MS2	MS2
	P04040	Catalase OS=Homo sapiens OX=9606 GN=CAT PE=1 SV=3	CAT	MS2	MS2
	Q12860	Contactin-1 OS=Homo sapiens OX=9606 GN=CNTN1 PE=1 SV=1	CNTN1	WiMT	WiMT
	P02753	Retinol-binding protein 4 OS=Homo sapiens OX=9606 GN=RBP4 PE=1 SV=3	RBP4	MS2	MS2
	P19320	Vascular cell adhesion protein 1 OS=Homo sapiens OX=9606 GN=VCAM1 PE=1 SV=1	VCAM1	MS2	MS2
	Q7Z7M0	Multiple epidermal growth factor-like domains protein 8 OS=Homo sapiens OX=9606 GN=MEGF8 PE=1 SV=2	MEGF8	WiMT	WiMT
	Q15582	Transforming growth factor-beta-induced protein ig-h3 OS=Homo sapiens OX=9606 GN=TGFBI PE=1 SV=1	TGFBI	MS2	MS2
	P43251	Biotinidase OS=Homo sapiens OX=9606 GN=BTD PE=1 SV=2	BTD	MS2	MS2
	P15169	Carboxypeptidase N catalytic chain OS=Homo sapiens OX=9606 GN=CPN1 PE=1 SV=1	CPN1	MS2	MS2
	P05543	Thyroxine-binding globulin OS=Homo sapiens OX=9606 GN=SERPINA7 PE=1 SV=2	SERPINA7	MS2	MS2
	P04278	Sex hormone-binding globulin OS=Homo sapiens OX=9606 GN=SHBG PE=1 SV=2	SHBG	MS2	MS2
	Q04756	Hepatocyte growth factor activator OS=Homo sapiens OX=9606 GN=HGFAC PE=1 SV=1	HGFAC	MS2	MS2
	Q6UXB8	Peptidase inhibitor 16 OS=Homo sapiens OX=9606 GN=PI16 PE=1 SV=1	PI16	MS2	MS2
	Q14515	SPARC-like protein 1 OS=Homo sapiens OX=9606 GN=SPARCL1 PE=1 SV=2	SPARCL1	MS2	WiMT
	P00742	Coagulation factor X OS=Homo sapiens OX=9606 GN=F10 PE=1 SV=2	F10	MS2	MS2
	P02749	Beta-2-glycoprotein 1 OS=Homo sapiens OX=9606 GN=APOH PE=1 SV=3	APOH	MS2	MS2
	Q96KN2	Beta-Ala-His dipeptidase OS=Homo sapiens OX=9606 GN=CNDP1 PE=1 SV=4	CNDP1	MS2	MS2
	P02763	Alpha-1-acid glycoprotein 1 OS=Homo sapiens OX=9606 GN=ORM1 PE=1 SV=1	ORM1	MS2	MS2
	P02649	Apolipoprotein E OS=Homo sapiens OX=9606 GN=APOE PE=1 SV=1	APOE	MS2	MS2
	O95497	Pantetheinase OS=Homo sapiens OX=9606 GN=VNN1 PE=1 SV=2	VNN1	MS2	MS2
	Q92954-3	Isoform C of Proteoglycan 4 OS=Homo sapiens OX=9606 GN=PRG4	PRG4		MS2
	Q86UX7	Fermitin family homolog 3 OS=Homo sapiens OX=9606 GN=FERMT3 PE=1 SV=1	FERMT3	MS2	MS2
	P19652	Alpha-1-acid glycoprotein 2 OS=Homo sapiens OX=9606 GN=ORM2 PE=1 SV=2	ORM2	MS2	MS2
	Q96IY4	Carboxypeptidase B2 OS=Homo sapiens OX=9606 GN=CPB2 PE=1 SV=2	CPB2	MS2	MS2
	P13591	Neural cell adhesion molecule 1 OS=Homo sapiens OX=9606 GN=NCAM1 PE=1 SV=3	NCAM1	MS2	MS2
	P35555	Fibrillin-1 OS=Homo sapiens OX=9606 GN=FBN1 PE=1 SV=4	FBN1	WiMT	WiMT
	Q9NZP8	Complement C1r subcomponent-like protein OS=Homo sapiens OX=9606 GN=C1RL PE=1 SV=2	C1RL	MS2	MS2
	P69905	Hemoglobin subunit alpha OS=Homo sapiens OX=9606 GN=HBA1 PE=1 SV=2	HBA1	MS2	MS2
	P35579	Myosin-9 OS=Homo sapiens OX=9606 GN=MYH9 PE=1 SV=4	MYH9	MS2	MS2
	P11021	Endoplasmic reticulum chaperone BiP OS=Homo sapiens OX=9606 GN=HSPA5 PE=1 SV=2	HSPA5	MS2	MS2
	P00740	Coagulation factor IX OS=Homo sapiens OX=9606 GN=F9 PE=1 SV=2	F9	MS2	MS2
	P00915	Carbonic anhydrase 1 OS=Homo sapiens OX=9606 GN=CA1 PE=1 SV=2	CA1	MS2	MS2
	P27487	Dipeptidyl peptidase 4 OS=Homo sapiens OX=9606 GN=DPP4 PE=1 SV=2	DPP4	WiMT	WiMT
	P22897	Macrophage mannose receptor 1 OS=Homo sapiens OX=9606 GN=MRC1 PE=1 SV=1	MRC1	WiMT	WiMT
	Q9UK55	Protein Z-dependent protease inhibitor OS=Homo sapiens OX=9606 GN=SERPINA10 PE=1 SV=1	SERPINA10	MS2	MS2
	P07360	Complement component C8 gamma chain OS=Homo sapiens OX=9606 GN=C8G PE=1 SV=3	C8G	MS2	MS2
	P35443	Thrombospondin-4 OS=Homo sapiens OX=9606 GN=THBS4 PE=1 SV=2	THBS4	WiMT	WiMT
	P12111	Collagen alpha-3(VI) chain OS=Homo sapiens OX=9606 GN=COL6A3 PE=1 SV=5	COL6A3	WiMT	WiMT
	P07225	Vitamin K-dependent protein S OS=Homo sapiens OX=9606 GN=PROS1 PE=1 SV=1	PROS1	MS2	MS2
	Q08380	Galectin-3-binding protein OS=Homo sapiens OX=9606 GN=LGALS3BP PE=1 SV=1	LGALS3BP	MS2	MS2
	P13647	Keratin, type II cytoskeletal 5 OS=Homo sapiens OX=9606 GN=KRT5 PE=1 SV=3	KRT5	MS2	MS2
	P68871	Hemoglobin subunit beta OS=Homo sapiens OX=9606 GN=HBB PE=1 SV=2	HBB	MS2	MS2
	P51884	Lumican OS=Homo sapiens OX=9606 GN=LUM PE=1 SV=2	LUM	MS2	MS2
	P08185	Corticosteroid-binding globulin OS=Homo sapiens OX=9606 GN=SERPINA6 PE=1 SV=1	SERPINA6	MS2	MS2
	P43121	Cell surface glycoprotein MUC18 OS=Homo sapiens OX=9606 GN=MCAM PE=1 SV=2	MCAM	MS2	MS2
	Q03591	Complement factor H-related protein 1 OS=Homo sapiens OX=9606 GN=CFHR1 PE=1 SV=2	CFHR1	MS2	MS2
	P11142	Heat shock cognate 71 kDa protein OS=Homo sapiens OX=9606 GN=HSPA8 PE=1 SV=1	HSPA8	MS2	MS2
	Q6YHK3	CD109 antigen OS=Homo sapiens OX=9606 GN=CD109 PE=1 SV=2	CD109	MS2	WiMT
	P01877	Immunoglobulin heavy constant alpha 2 OS=Homo sapiens OX=9606 GN=IGHA2 PE=1 SV=4	IGHA2	MS2	MS2
	P12955	Xaa-Pro dipeptidase OS=Homo sapiens OX=9606 GN=PEPD PE=1 SV=3	PEPD	MS2	MS2
	P02750	Leucine-rich alpha-2-glycoprotein OS=Homo sapiens OX=9606 GN=LRG1 PE=1 SV=2	LRG1	MS2	MS2
	Q76LX8	A disintegrin and metalloproteinase with thrombospondin motifs 13 OS=Homo sapiens OX=9606 GN=ADAMTS13 PE=1 SV=1	ADAMTS13	WiMT	MS2
	P00746	Complement factor D OS=Homo sapiens OX=9606 GN=CFD PE=1 SV=5	CFD	MS2	MS2
	O95479	GDH/6PGL endoplasmic bifunctional protein OS=Homo sapiens OX=9606 GN=H6PD PE=1 SV=2	H6PD	WiMT	WiMT
	P30101	Protein disulfide-isomerase A3 OS=Homo sapiens OX=9606 GN=PDIA3 PE=1 SV=4	PDIA3	WiMT	MS2
	Q12805	EGF-containing fibulin-like extracellular matrix protein 1 OS=Homo sapiens OX=9606 GN=EFEMP1 PE=1 SV=2	EFEMP1	MS2	MS2
	P02746	Complement C1q subcomponent subunit B OS=Homo sapiens OX=9606 GN=C1QB PE=1 SV=3	C1QB	MS2	MS2
	P08571	Monocyte differentiation antigen CD14 OS=Homo sapiens OX=9606 GN=CD14 PE=1 SV=2	CD14	MS2	MS2
	P0DOY2	Immunoglobulin lambda constant 2 OS=Homo sapiens OX=9606 GN=IGLC2 PE=1 SV=1	IGLC2	MS2	MS2
	P02533	Keratin, type I cytoskeletal 14 OS=Homo sapiens OX=9606 GN=KRT14 PE=1 SV=4	KRT14	MS2	MS2
	P10586	Receptor-type tyrosine-protein phosphatase F OS=Homo sapiens OX=9606 GN=PTPRF PE=1 SV=2	PTPRF	WiMT	WiMT
	P04070	Vitamin K-dependent protein C OS=Homo sapiens OX=9606 GN=PROC PE=1 SV=1	PROC	MS2	MS2
	P02743	Serum amyloid P-component OS=Homo sapiens OX=9606 GN=APCS PE=1 SV=2	APCS	MS2	MS2
	P07942	Laminin subunit beta-1 OS=Homo sapiens OX=9606 GN=LAMB1 PE=1 SV=2	LAMB1	WiMT	WiMT
	O43866	CD5 antigen-like OS=Homo sapiens OX=9606 GN=CD5L PE=1 SV=1	CD5L	MS2	MS2
	O00187	Mannan-binding lectin serine protease 2 OS=Homo sapiens OX=9606 GN=MASP2 PE=1 SV=4	MASP2	MS2	MS2
	P02538	Keratin, type II cytoskeletal 6A OS=Homo sapiens OX=9606 GN=KRT6A PE=1 SV=3	KRT6A	MS2	MS2
	O75083	WD repeat-containing protein 1 OS=Homo sapiens OX=9606 GN=WDR1 PE=1 SV=4	WDR1	WiMT	MS2
	O75636	Ficolin-3 OS=Homo sapiens OX=9606 GN=FCN3 PE=1 SV=2	FCN3	MS2	MS2
	P04075	Fructose-bisphosphate aldolase A OS=Homo sapiens OX=9606 GN=ALDOA PE=1 SV=2	ALDOA	MS2	MS2
	P54802	Alpha-N-acetylglucosaminidase OS=Homo sapiens OX=9606 GN=NAGLU PE=1 SV=2	NAGLU	WiMT	WiMT
	Q13822	Ectonucleotide pyrophosphatase/phosphodiesterase family member 2 OS=Homo sapiens OX=9606 GN=ENPP2 PE=1 SV=3	ENPP2	WiMT	WiMT
	O14786	Neuropilin-1 OS=Homo sapiens OX=9606 GN=NRP1 PE=1 SV=3	NRP1	WiMT	WiMT
	B9A064	Immunoglobulin lambda-like polypeptide 5 OS=Homo sapiens OX=9606 GN=IGLL5 PE=2 SV=2	IGLL5	MS2	MS2
	P31150	Rab GDP dissociation inhibitor alpha OS=Homo sapiens OX=9606 GN=GDI1 PE=1 SV=2	GDI1	WiMT	WiMT
	P08779	Keratin, type I cytoskeletal 16 OS=Homo sapiens OX=9606 GN=KRT16 PE=1 SV=4	KRT16	WiMT	MS2
	P09486	SPARC OS=Homo sapiens OX=9606 GN=SPARC PE=1 SV=1	SPARC	WiMT	MS2
	Q9H4A9	Dipeptidase 2 OS=Homo sapiens OX=9606 GN=DPEP2 PE=1 SV=3	DPEP2	WiMT	WiMT
	P04259	Keratin, type II cytoskeletal 6B OS=Homo sapiens OX=9606 GN=KRT6B PE=1 SV=5	KRT6B	WiMT	MS2
	P12821	Angiotensin-converting enzyme OS=Homo sapiens OX=9606 GN=ACE PE=1 SV=1	ACE	WiMT	WiMT
	P22891	Vitamin K-dependent protein Z OS=Homo sapiens OX=9606 GN=PROZ PE=1 SV=2	PROZ	MS2	MS2
	Q14520	Hyaluronan-binding protein 2 OS=Homo sapiens OX=9606 GN=HABP2 PE=1 SV=1	HABP2	MS2	MS2
	P05154	Plasma serine protease inhibitor OS=Homo sapiens OX=9606 GN=SERPINA5 PE=1 SV=3	SERPINA5	MS2	MS2
	P14618	Pyruvate kinase PKM OS=Homo sapiens OX=9606 GN=PKM PE=1 SV=4	PKM	WiMT	MS2
	Q12884	Prolyl endopeptidase FAP OS=Homo sapiens OX=9606 GN=FAP PE=1 SV=5	FAP	WiMT	WiMT
	P14625	Endoplasmin OS=Homo sapiens OX=9606 GN=HSP90B1 PE=1 SV=1	HSP90B1	MS2	MS2
	O95445	Apolipoprotein M OS=Homo sapiens OX=9606 GN=APOM PE=1 SV=2	APOM	MS2	MS2
	O14791	Apolipoprotein L1 OS=Homo sapiens OX=9606 GN=APOL1 PE=1 SV=5	APOL1	MS2	MS2
	P50395	Rab GDP dissociation inhibitor beta OS=Homo sapiens OX=9606 GN=GDI2 PE=1 SV=2	GDI2	WiMT	WiMT
	P08709	Coagulation factor VII OS=Homo sapiens OX=9606 GN=F7 PE=1 SV=1	F7	MS2	MS2
	Q92859	Neogenin OS=Homo sapiens OX=9606 GN=NEO1 PE=1 SV=2	NEO1	WiMT	WiMT
	P68133	Actin, alpha skeletal muscle OS=Homo sapiens OX=9606 GN=ACTA1 PE=1 SV=1	ACTA1	MS2	MS2
	P24043	Laminin subunit alpha-2 OS=Homo sapiens OX=9606 GN=LAMA2 PE=1 SV=4	LAMA2	WiMT	WiMT
	P23470	Receptor-type tyrosine-protein phosphatase gamma OS=Homo sapiens OX=9606 GN=PTPRG PE=1 SV=4	PTPRG	WiMT	WiMT
	Q16853	Membrane primary amine oxidase OS=Homo sapiens OX=9606 GN=AOC3 PE=1 SV=3	AOC3	WiMT	WiMT
	Q9UGM5	Fetuin-B OS=Homo sapiens OX=9606 GN=FETUB PE=1 SV=2	FETUB	MS2	MS2
	P63104	14-3-3 protein zeta/delta OS=Homo sapiens OX=9606 GN=YWHAZ PE=1 SV=1	YWHAZ	MS2	MS2
	Q9P232	Contactin-3 OS=Homo sapiens OX=9606 GN=CNTN3 PE=1 SV=3	CNTN3	WiMT	WiMT
	P27918	Properdin OS=Homo sapiens OX=9606 GN=CFP PE=1 SV=2	CFP	MS2	MS2
	P33151	Cadherin-5 OS=Homo sapiens OX=9606 GN=CDH5 PE=1 SV=5	CDH5	MS2	MS2
	Q6EMK4	Vasorin OS=Homo sapiens OX=9606 GN=VASN PE=1 SV=1	VASN	MS2	MS2
	P18428	Lipopolysaccharide-binding protein OS=Homo sapiens OX=9606 GN=LBP PE=1 SV=3	LBP	MS2	MS2
	Q2TV78	Putative macrophage stimulating 1-like protein OS=Homo sapiens OX=9606 GN=MST1L PE=2 SV=2	MST1L	WiMT	WiMT
	P60174-1	Isoform 2 of Triosephosphate isomerase OS=Homo sapiens OX=9606 GN=TPI1	TPI1	MS2	MS2
	P55058	Phospholipid transfer protein OS=Homo sapiens OX=9606 GN=PLTP PE=1 SV=1	PLTP	MS2	MS2
	P05452	Tetranectin OS=Homo sapiens OX=9606 GN=CLEC3B PE=1 SV=3	CLEC3B	MS2	MS2
	Q92820	Gamma-glutamyl hydrolase OS=Homo sapiens OX=9606 GN=GGH PE=1 SV=2	GGH	MS2	MS2
	Q9NQ79	Cartilage acidic protein 1 OS=Homo sapiens OX=9606 GN=CRTAC1 PE=1 SV=2	CRTAC1	MS2	MS2
	P04406	Glyceraldehyde-3-phosphate dehydrogenase OS=Homo sapiens OX=9606 GN=GAPDH PE=1 SV=3	GAPDH	MS2	MS2
	P13667	Protein disulfide-isomerase A4 OS=Homo sapiens OX=9606 GN=PDIA4 PE=1 SV=2	PDIA4	WiMT	WiMT
	P33908	Mannosyl-oligosaccharide 1,2-alpha-mannosidase IA OS=Homo sapiens OX=9606 GN=MAN1A1 PE=1 SV=3	MAN1A1	MS2	MS2
	P17936	Insulin-like growth factor-binding protein 3 OS=Homo sapiens OX=9606 GN=IGFBP3 PE=1 SV=2	IGFBP3	MS2	MS2
	P02042	Hemoglobin subunit delta OS=Homo sapiens OX=9606 GN=HBD PE=1 SV=2	HBD	MS2	MS2
	P67936	Tropomyosin alpha-4 chain OS=Homo sapiens OX=9606 GN=TPM4 PE=1 SV=3	TPM4	MS2	MS2
	Q10588	ADP-ribosyl cyclase/cyclic ADP-ribose hydrolase 2 OS=Homo sapiens OX=9606 GN=BST1 PE=1 SV=2	BST1	WiMT	WiMT
	P37802	Transgelin-2 OS=Homo sapiens OX=9606 GN=TAGLN2 PE=1 SV=3	TAGLN2	MS2	MS2
	P08195	4F2 cell-surface antigen heavy chain OS=Homo sapiens OX=9606 GN=SLC3A2 PE=1 SV=3	SLC3A2	WiMT	WiMT
	Q86YZ3	Hornerin OS=Homo sapiens OX=9606 GN=HRNR PE=1 SV=2	HRNR	MS2	MS2
	P00390	Glutathione reductase, mitochondrial OS=Homo sapiens OX=9606 GN=GSR PE=1 SV=2	GSR	WiMT	WiMT
	P40197	Platelet glycoprotein V OS=Homo sapiens OX=9606 GN=GP5 PE=1 SV=1	GP5	WiMT	WiMT
	P35916-1	Isoform 2 of Vascular endothelial growth factor receptor 3 OS=Homo sapiens OX=9606 GN=FLT4	FLT4	WiMT	WiMT
	P00533	Epidermal growth factor receptor OS=Homo sapiens OX=9606 GN=EGFR PE=1 SV=2	EGFR	WiMT	WiMT
	P02745	Complement C1q subcomponent subunit A OS=Homo sapiens OX=9606 GN=C1QA PE=1 SV=2	C1QA	MS2	MS2
	Q9BXR6	Complement factor H-related protein 5 OS=Homo sapiens OX=9606 GN=CFHR5 PE=1 SV=1	CFHR5	MS2	MS2
	P62258	14-3-3 protein epsilon OS=Homo sapiens OX=9606 GN=YWHAE PE=1 SV=1	YWHAE	MS2	MS2
	Q01459	Di-N-acetylchitobiase OS=Homo sapiens OX=9606 GN=CTBS PE=1 SV=1	CTBS	MS2	MS2
	Q15063-5	Isoform 5 of Periostin OS=Homo sapiens OX=9606 GN=POSTN	POSTN	WiMT	WiMT
	P61981	14-3-3 protein gamma OS=Homo sapiens OX=9606 GN=YWHAG PE=1 SV=2	YWHAG	WiMT	WiMT
	Q86WI1	Fibrocystin-L OS=Homo sapiens OX=9606 GN=PKHD1L1 PE=2 SV=2	PKHD1L1	WiMT	WiMT
	Q9UHG3	Prenylcysteine oxidase 1 OS=Homo sapiens OX=9606 GN=PCYOX1 PE=1 SV=3	PCYOX1	MS2	MS2
	P26038	Moesin OS=Homo sapiens OX=9606 GN=MSN PE=1 SV=3	MSN	WiMT	MS2
	Q9UBG0	C-type mannose receptor 2 OS=Homo sapiens OX=9606 GN=MRC2 PE=1 SV=2	MRC2	WiMT	WiMT
	Q13332-2	Isoform PTPS-MEA of Receptor-type tyrosine-protein phosphatase S OS=Homo sapiens OX=9606 GN=PTPRS	PTPRS	WiMT	WiMT
	P04180	Phosphatidylcholine-sterol acyltransferase OS=Homo sapiens OX=9606 GN=LCAT PE=1 SV=1	LCAT	MS2	MS2
	Q07075	Glutamyl aminopeptidase OS=Homo sapiens OX=9606 GN=ENPEP PE=1 SV=3	ENPEP	WiMT	WiMT
	P16930	Fumarylacetoacetase OS=Homo sapiens OX=9606 GN=FAH PE=1 SV=2	FAH	WiMT	WiMT
	P06744	Glucose-6-phosphate isomerase OS=Homo sapiens OX=9606 GN=GPI PE=1 SV=4	GPI	WiMT	WiMT
	P00918	Carbonic anhydrase 2 OS=Homo sapiens OX=9606 GN=CA2 PE=1 SV=2	CA2	MS2	MS2
	P02792	Ferritin light chain OS=Homo sapiens OX=9606 GN=FTL PE=1 SV=2	FTL	WiMT	MS2
	P08294	Extracellular superoxide dismutase [Cu-Zn] OS=Homo sapiens OX=9606 GN=SOD3 PE=1 SV=2	SOD3	WiMT	MS2
	P32004	Neural cell adhesion molecule L1 OS=Homo sapiens OX=9606 GN=L1CAM PE=1 SV=2	L1CAM	WiMT	MS2
	Q12913	Receptor-type tyrosine-protein phosphatase eta OS=Homo sapiens OX=9606 GN=PTPRJ PE=1 SV=3	PTPRJ	WiMT	WiMT
	P22352	Glutathione peroxidase 3 OS=Homo sapiens OX=9606 GN=GPX3 PE=1 SV=2	GPX3	MS2	MS2
	P01880	Immunoglobulin heavy constant delta OS=Homo sapiens OX=9606 GN=IGHD PE=1 SV=3	IGHD	MS2	MS2
	P02747	Complement C1q subcomponent subunit C OS=Homo sapiens OX=9606 GN=C1QC PE=1 SV=3	C1QC	MS2	MS2
	P07237	Protein disulfide-isomerase OS=Homo sapiens OX=9606 GN=P4HB PE=1 SV=3	P4HB	MS2	MS2
	Q14766	Latent-transforming growth factor beta-binding protein 1 OS=Homo sapiens OX=9606 GN=LTBP1 PE=1 SV=4	LTBP1	WiMT	MS2
	Q15166	Serum paraoxonase/lactonase 3 OS=Homo sapiens OX=9606 GN=PON3 PE=1 SV=3	PON3	MS2	MS2
	P40189	Interleukin-6 receptor subunit beta OS=Homo sapiens OX=9606 GN=IL6ST PE=1 SV=2	IL6ST	WiMT	WiMT
	P20851	C4b-binding protein beta chain OS=Homo sapiens OX=9606 GN=C4BPB PE=1 SV=1	C4BPB	MS2	MS2
	P07359	Platelet glycoprotein Ib alpha chain OS=Homo sapiens OX=9606 GN=GP1BA PE=1 SV=2	GP1BA	MS2	MS2
	P00491	Purine nucleoside phosphorylase OS=Homo sapiens OX=9606 GN=PNP PE=1 SV=2	PNP	WiMT	WiMT
	P11226	Mannose-binding protein C OS=Homo sapiens OX=9606 GN=MBL2 PE=1 SV=2	MBL2	MS2	MS2
	P01591	Immunoglobulin J chain OS=Homo sapiens OX=9606 GN=JCHAIN PE=1 SV=4	JCHAIN	MS2	MS2
	P07737	Profilin-1 OS=Homo sapiens OX=9606 GN=PFN1 PE=1 SV=2	PFN1	MS2	MS2
	P0DJI8	Serum amyloid A-1 protein OS=Homo sapiens OX=9606 GN=SAA1 PE=1 SV=1	SAA1	MS2	MS2
	Q15113	Procollagen C-endopeptidase enhancer 1 OS=Homo sapiens OX=9606 GN=PCOLCE PE=1 SV=2	PCOLCE	MS2	MS2
	P30740	Leukocyte elastase inhibitor OS=Homo sapiens OX=9606 GN=SERPINB1 PE=1 SV=1	SERPINB1	WiMT	MS2
	Q9NPH3	Interleukin-1 receptor accessory protein OS=Homo sapiens OX=9606 GN=IL1RAP PE=1 SV=2	IL1RAP	MS2	MS2
	A1L4H1	Soluble scavenger receptor cysteine-rich domain-containing protein SSC5D OS=Homo sapiens OX=9606 GN=SSC5D PE=1 SV=3	SSC5D	WiMT	WiMT
	P05362	Intercellular adhesion molecule 1 OS=Homo sapiens OX=9606 GN=ICAM1 PE=1 SV=2	ICAM1	MS2	MS2
	Q04721	Neurogenic locus notch homolog protein 2 OS=Homo sapiens OX=9606 GN=NOTCH2 PE=1 SV=3	NOTCH2	WiMT	WiMT
	Q8IWV2	Contactin-4 OS=Homo sapiens OX=9606 GN=CNTN4 PE=1 SV=1	CNTN4	WiMT	WiMT
	P36980	Complement factor H-related protein 2 OS=Homo sapiens OX=9606 GN=CFHR2 PE=1 SV=1	CFHR2	MS2	MS2
	Q13228	Methanethiol oxidase OS=Homo sapiens OX=9606 GN=SELENBP1 PE=1 SV=2	SELENBP1	WiMT	MS2
	Q8NBP7	Proprotein convertase subtilisin/kexin type 9 OS=Homo sapiens OX=9606 GN=PCSK9 PE=1 SV=3	PCSK9	WiMT	WiMT
	Q7Z7G0	Target of Nesh-SH3 OS=Homo sapiens OX=9606 GN=ABI3BP PE=1 SV=1	ABI3BP	MS2	MS2
	P00558	Phosphoglycerate kinase 1 OS=Homo sapiens OX=9606 GN=PGK1 PE=1 SV=3	PGK1	MS2	MS2
	P01034	Cystatin-C OS=Homo sapiens OX=9606 GN=CST3 PE=1 SV=1	CST3	MS2	MS2
	P35542	Serum amyloid A-4 protein OS=Homo sapiens OX=9606 GN=SAA4 PE=1 SV=2	SAA4	MS2	MS2
	P68363	Tubulin alpha-1B chain OS=Homo sapiens OX=9606 GN=TUBA1B PE=1 SV=1	TUBA1B	MS2	MS2
	Q9Y4L1	Hypoxia up-regulated protein 1 OS=Homo sapiens OX=9606 GN=HYOU1 PE=1 SV=1	HYOU1	WiMT	WiMT
	P12109	Collagen alpha-1(VI) chain OS=Homo sapiens OX=9606 GN=COL6A1 PE=1 SV=3	COL6A1	WiMT	WiMT
	P08567	Pleckstrin OS=Homo sapiens OX=9606 GN=PLEK PE=1 SV=3	PLEK	MS2	MS2
	P07858	Cathepsin B OS=Homo sapiens OX=9606 GN=CTSB PE=1 SV=3	CTSB	WiMT	WiMT
	O15394	Neural cell adhesion molecule 2 OS=Homo sapiens OX=9606 GN=NCAM2 PE=1 SV=2	NCAM2	WiMT	WiMT
	P06753-2	Isoform 2 of Tropomyosin alpha-3 chain OS=Homo sapiens OX=9606 GN=TPM3	TPM3	MS2	MS2
	Q01518	Adenylyl cyclase-associated protein 1 OS=Homo sapiens OX=9606 GN=CAP1 PE=1 SV=5	CAP1	MS2	MS2
	P00441	Superoxide dismutase [Cu-Zn] OS=Homo sapiens OX=9606 GN=SOD1 PE=1 SV=2	SOD1	WiMT	MS2
	P17174	Aspartate aminotransferase, cytoplasmic OS=Homo sapiens OX=9606 GN=GOT1 PE=1 SV=3	GOT1	WiMT	WiMT
	P31946	14-3-3 protein beta/alpha OS=Homo sapiens OX=9606 GN=YWHAB PE=1 SV=3	YWHAB	WiMT	MS2
	P14543	Nidogen-1 OS=Homo sapiens OX=9606 GN=NID1 PE=1 SV=3	NID1	WiMT	WiMT
	P0DJI9	Serum amyloid A-2 protein OS=Homo sapiens OX=9606 GN=SAA2 PE=1 SV=1	SAA2	MS2	MS2
	P15924	Desmoplakin OS=Homo sapiens OX=9606 GN=DSP PE=1 SV=3	DSP	WiMT	WiMT
	P14314	Glucosidase 2 subunit beta OS=Homo sapiens OX=9606 GN=PRKCSH PE=1 SV=2	PRKCSH	WiMT	WiMT
	P07333	Macrophage colony-stimulating factor 1 receptor OS=Homo sapiens OX=9606 GN=CSF1R PE=1 SV=2	CSF1R	WiMT	WiMT
	P02786	Transferrin receptor protein 1 OS=Homo sapiens OX=9606 GN=TFRC PE=1 SV=2	TFRC	MS2	MS2
	Q14315	Filamin-C OS=Homo sapiens OX=9606 GN=FLNC PE=1 SV=3	FLNC	WiMT	WiMT
	Q6UX71	Plexin domain-containing protein 2 OS=Homo sapiens OX=9606 GN=PLXDC2 PE=1 SV=1	PLXDC2	MS2	MS2
	P49908	Selenoprotein P OS=Homo sapiens OX=9606 GN=SELENOP PE=1 SV=3	SELENOP	MS2	MS2
	Q9H4B7	Tubulin beta-1 chain OS=Homo sapiens OX=9606 GN=TUBB1 PE=1 SV=1	TUBB1	MS2	MS2
	P30043	Flavin reductase (NADPH) OS=Homo sapiens OX=9606 GN=BLVRB PE=1 SV=3	BLVRB	MS2	MS2
	P07911	Uromodulin OS=Homo sapiens OX=9606 GN=UMOD PE=1 SV=1	UMOD	WiMT	WiMT
	P07339	Cathepsin D OS=Homo sapiens OX=9606 GN=CTSD PE=1 SV=1	CTSD	WiMT	WiMT
	Q04917	14-3-3 protein eta OS=Homo sapiens OX=9606 GN=YWHAH PE=1 SV=4	YWHAH	WiMT	MS2
	P55290	Cadherin-13 OS=Homo sapiens OX=9606 GN=CDH13 PE=1 SV=1	CDH13	MS2	MS2
	A0A0C4DH31	Immunoglobulin heavy variable 1-18 OS=Homo sapiens OX=9606 GN=IGHV1-18 PE=3 SV=1	IGHV1-18	MS2	MS2
	Q9NZK5	Adenosine deaminase 2 OS=Homo sapiens OX=9606 GN=ADA2 PE=1 SV=2	ADA2	WiMT	WiMT
	P52566	Rho GDP-dissociation inhibitor 2 OS=Homo sapiens OX=9606 GN=ARHGDIB PE=1 SV=3	ARHGDIB	MS2	MS2
	P01768	Immunoglobulin heavy variable 3-30 OS=Homo sapiens OX=9606 GN=IGHV3-30 PE=1 SV=2	IGHV3-30	MS2	MS2
	P05556	Integrin beta-1 OS=Homo sapiens OX=9606 GN=ITGB1 PE=1 SV=2	ITGB1	MS2	MS2
	P11047	Laminin subunit gamma-1 OS=Homo sapiens OX=9606 GN=LAMC1 PE=1 SV=3	LAMC1	WiMT	WiMT
	P27348	14-3-3 protein theta OS=Homo sapiens OX=9606 GN=YWHAQ PE=1 SV=1	YWHAQ	WiMT	MS2
	P15151	Poliovirus receptor OS=Homo sapiens OX=9606 GN=PVR PE=1 SV=2	PVR	WiMT	WiMT
	Q9NY33	Dipeptidyl peptidase 3 OS=Homo sapiens OX=9606 GN=DPP3 PE=1 SV=2	DPP3	WiMT	WiMT
	P06702	Protein S100-A9 OS=Homo sapiens OX=9606 GN=S100A9 PE=1 SV=1	S100A9	WiMT	MS2
	O95980	Reversion-inducing cysteine-rich protein with Kazal motifs OS=Homo sapiens OX=9606 GN=RECK PE=1 SV=1	RECK	WiMT	WiMT
	P16109	P-selectin OS=Homo sapiens OX=9606 GN=SELP PE=1 SV=3	SELP	WiMT	MS2
	Q16706	Alpha-mannosidase 2 OS=Homo sapiens OX=9606 GN=MAN2A1 PE=1 SV=2	MAN2A1	WiMT	WiMT
	Q13740	CD166 antigen OS=Homo sapiens OX=9606 GN=ALCAM PE=1 SV=2	ALCAM	WiMT	WiMT
	P29401	Transketolase OS=Homo sapiens OX=9606 GN=TKT PE=1 SV=3	TKT	WiMT	WiMT
	Q15848	Adiponectin OS=Homo sapiens OX=9606 GN=ADIPOQ PE=1 SV=1	ADIPOQ	MS2	MS2
	Q96S96	Phosphatidylethanolamine-binding protein 4 OS=Homo sapiens OX=9606 GN=PEBP4 PE=1 SV=3	PEBP4	WiMT	MS2
	P07686	Beta-hexosaminidase subunit beta OS=Homo sapiens OX=9606 GN=HEXB PE=1 SV=3	HEXB	WiMT	WiMT
	Q8N6C8	Leukocyte immunoglobulin-like receptor subfamily A member 3 OS=Homo sapiens OX=9606 GN=LILRA3 PE=1 SV=3	LILRA3	MS2	WiMT
	P30086	Phosphatidylethanolamine-binding protein 1 OS=Homo sapiens OX=9606 GN=PEBP1 PE=1 SV=3	PEBP1	WiMT	WiMT
	Q14126	Desmoglein-2 OS=Homo sapiens OX=9606 GN=DSG2 PE=1 SV=2	DSG2	WiMT	WiMT
	P29508	Serpin B3 OS=Homo sapiens OX=9606 GN=SERPINB3 PE=1 SV=2	SERPINB3	WiMT	WiMT
	P68366	Tubulin alpha-4A chain OS=Homo sapiens OX=9606 GN=TUBA4A PE=1 SV=1	TUBA4A	MS2	MS2
	A0A0C4DH38	Immunoglobulin heavy variable 5-51 OS=Homo sapiens OX=9606 GN=IGHV5-51 PE=3 SV=1	IGHV5-51	MS2	MS2
	P07195	L-lactate dehydrogenase B chain OS=Homo sapiens OX=9606 GN=LDHB PE=1 SV=2	LDHB	MS2	MS2
	O60462	Neuropilin-2 OS=Homo sapiens OX=9606 GN=NRP2 PE=1 SV=3	NRP2	WiMT	WiMT
	P06733	Alpha-enolase OS=Homo sapiens OX=9606 GN=ENO1 PE=1 SV=2	ENO1	WiMT	MS2
	Q9NZ08	Endoplasmic reticulum aminopeptidase 1 OS=Homo sapiens OX=9606 GN=ERAP1 PE=1 SV=3	ERAP1	WiMT	WiMT
	Q9HBI1-3	Isoform 3 of Beta-parvin OS=Homo sapiens OX=9606 GN=PARVB	PARVB	WiMT	MS2
	Q99784	Noelin OS=Homo sapiens OX=9606 GN=OLFM1 PE=1 SV=4	OLFM1	MS2	MS2
	P48637	Glutathione synthetase OS=Homo sapiens OX=9606 GN=GSS PE=1 SV=1	GSS	WiMT	WiMT
	P05062	Fructose-bisphosphate aldolase B OS=Homo sapiens OX=9606 GN=ALDOB PE=1 SV=2	ALDOB	MS2	MS2
	P0DP04	Immunoglobulin heavy variable 3-43D OS=Homo sapiens OX=9606 GN=IGHV3-43D PE=3 SV=1	IGHV3-43D	MS2	MS2
	P78386	Keratin, type II cuticular Hb5 OS=Homo sapiens OX=9606 GN=KRT85 PE=1 SV=1	KRT85		WiMT
	P78385	Keratin, type II cuticular Hb3 OS=Homo sapiens OX=9606 GN=KRT83 PE=1 SV=2	KRT83	WiMT	WiMT
	P48594	Serpin B4 OS=Homo sapiens OX=9606 GN=SERPINB4 PE=1 SV=2	SERPINB4	WiMT	WiMT
	Q9UBW5	Bridging integrator 2 OS=Homo sapiens OX=9606 GN=BIN2 PE=1 SV=3	BIN2	WiMT	WiMT
	P23528	Cofilin-1 OS=Homo sapiens OX=9606 GN=CFL1 PE=1 SV=3	CFL1	MS2	MS2
	Q9ULI3	Protein HEG homolog 1 OS=Homo sapiens OX=9606 GN=HEG1 PE=1 SV=3	HEG1	MS2	MS2
	Q15404	Ras suppressor protein 1 OS=Homo sapiens OX=9606 GN=RSU1 PE=1 SV=3	RSU1	WiMT	MS2
	P14151	L-selectin OS=Homo sapiens OX=9606 GN=SELL PE=1 SV=2	SELL	MS2	MS2
	P23083	Immunoglobulin heavy variable 1-2 OS=Homo sapiens OX=9606 GN=IGHV1-2 PE=1 SV=2	IGHV1-2	MS2	MS2
	Q92823	Neuronal cell adhesion molecule OS=Homo sapiens OX=9606 GN=NRCAM PE=1 SV=3	NRCAM	WiMT	WiMT
	P0DMV9	Heat shock 70 kDa protein 1B OS=Homo sapiens OX=9606 GN=HSPA1B PE=1 SV=1	HSPA1B	WiMT	WiMT
	Q8IZF2	Adhesion G protein-coupled receptor F5 OS=Homo sapiens OX=9606 GN=ADGRF5 PE=1 SV=3	ADGRF5	MS2	MS2
	O95810	Caveolae-associated protein 2 OS=Homo sapiens OX=9606 GN=CAVIN2 PE=1 SV=3	CAVIN2	MS2	MS2
	Q15323	Keratin, type I cuticular Ha1 OS=Homo sapiens OX=9606 GN=KRT31 PE=1 SV=3	KRT31	WiMT	WiMT
	Q04695	Keratin, type I cytoskeletal 17 OS=Homo sapiens OX=9606 GN=KRT17 PE=1 SV=2	KRT17	WiMT	WiMT
	Q02413	Desmoglein-1 OS=Homo sapiens OX=9606 GN=DSG1 PE=1 SV=2	DSG1	WiMT	MS2
	O00299	Chloride intracellular channel protein 1 OS=Homo sapiens OX=9606 GN=CLIC1 PE=1 SV=4	CLIC1	WiMT	MS2
	P62937	Peptidyl-prolyl cis-trans isomerase A OS=Homo sapiens OX=9606 GN=PPIA PE=1 SV=2	PPIA	MS2	MS2
	Q99497	Protein/nucleic acid deglycase DJ-1 OS=Homo sapiens OX=9606 GN=PARK7 PE=1 SV=2	PARK7	WiMT	WiMT
	Q9UNW1	Multiple inositol polyphosphate phosphatase 1 OS=Homo sapiens OX=9606 GN=MINPP1 PE=1 SV=1	MINPP1	MS2	WiMT
	P39060	Collagen alpha-1(XVIII) chain OS=Homo sapiens OX=9606 GN=COL18A1 PE=1 SV=5	COL18A1	MS2	MS2
	P09493-8	Isoform 8 of Tropomyosin alpha-1 chain OS=Homo sapiens OX=9606 GN=TPM1	TPM1	WiMT	MS2
	P09972	Fructose-bisphosphate aldolase C OS=Homo sapiens OX=9606 GN=ALDOC PE=1 SV=2	ALDOC	WiMT	MS2
	P01742	Immunoglobulin heavy variable 1-69 OS=Homo sapiens OX=9606 GN=IGHV1-69 PE=1 SV=2	IGHV1-69	MS2	MS2
	P04066	Tissue alpha-L-fucosidase OS=Homo sapiens OX=9606 GN=FUCA1 PE=1 SV=4	FUCA1	WiMT	WiMT
	O95678	Keratin, type II cytoskeletal 75 OS=Homo sapiens OX=9606 GN=KRT75 PE=1 SV=2	KRT75	WiMT	WiMT
	Q9NPY3	Complement component C1q receptor OS=Homo sapiens OX=9606 GN=CD93 PE=1 SV=3	CD93	WiMT	WiMT
	P78417	Glutathione S-transferase omega-1 OS=Homo sapiens OX=9606 GN=GSTO1 PE=1 SV=2	GSTO1	MS2	MS2
	Q6P179	Endoplasmic reticulum aminopeptidase 2 OS=Homo sapiens OX=9606 GN=ERAP2 PE=1 SV=2	ERAP2	WiMT	WiMT
	P01833	Polymeric immunoglobulin receptor OS=Homo sapiens OX=9606 GN=PIGR PE=1 SV=4	PIGR	MS2	MS2
	P16070	CD44 antigen OS=Homo sapiens OX=9606 GN=CD44 PE=1 SV=3	CD44	MS2	MS2
	P13797	Plastin-3 OS=Homo sapiens OX=9606 GN=PLS3 PE=1 SV=4	PLS3	WiMT	WiMT
	P02652	Apolipoprotein A-II OS=Homo sapiens OX=9606 GN=APOA2 PE=1 SV=1	APOA2	MS2	MS2
	P35590	Tyrosine-protein kinase receptor Tie-1 OS=Homo sapiens OX=9606 GN=TIE1 PE=1 SV=1	TIE1	WiMT	WiMT
	A0A0B4J1Y9	Immunoglobulin heavy variable 3-72 OS=Homo sapiens OX=9606 GN=IGHV3-72 PE=3 SV=1	IGHV3-72	MS2	MS2
	P07900	Heat shock protein HSP 90-alpha OS=Homo sapiens OX=9606 GN=HSP90AA1 PE=1 SV=5	HSP90AA1	WiMT	WiMT
	P07951-2	Isoform 2 of Tropomyosin beta chain OS=Homo sapiens OX=9606 GN=TPM2	TPM2	WiMT	WiMT
	P08581	Hepatocyte growth factor receptor OS=Homo sapiens OX=9606 GN=MET PE=1 SV=4	MET	WiMT	WiMT
	O15031	Plexin-B2 OS=Homo sapiens OX=9606 GN=PLXNB2 PE=1 SV=3	PLXNB2	WiMT	WiMT
	Q14118	Dystroglycan OS=Homo sapiens OX=9606 GN=DAG1 PE=1 SV=2	DAG1	WiMT	WiMT
	A0A075B6P5	Immunoglobulin kappa variable 2-28 OS=Homo sapiens OX=9606 GN=IGKV2-28 PE=3 SV=1	IGKV2-28	MS2	MS2
	P12830	Cadherin-1 OS=Homo sapiens OX=9606 GN=CDH1 PE=1 SV=3	CDH1	WiMT	WiMT
	O43157	Plexin-B1 OS=Homo sapiens OX=9606 GN=PLXNB1 PE=1 SV=3	PLXNB1	WiMT	WiMT
	P20023-3	Isoform C of Complement receptor type 2 OS=Homo sapiens OX=9606 GN=CR2	CR2	WiMT	WiMT
	P10721	Mast/stem cell growth factor receptor Kit OS=Homo sapiens OX=9606 GN=KIT PE=1 SV=1	KIT	WiMT	WiMT
	P10153	Non-secretory ribonuclease OS=Homo sapiens OX=9606 GN=RNASE2 PE=1 SV=2	RNASE2	WiMT	WiMT
	P05106	Integrin beta-3 OS=Homo sapiens OX=9606 GN=ITGB3 PE=1 SV=2	ITGB3	MS2	MS2
	P02655	Apolipoprotein C-II OS=Homo sapiens OX=9606 GN=APOC2 PE=1 SV=1	APOC2	MS2	MS2
	A0A0B4J2H0	Immunoglobulin heavy variable 1-69D OS=Homo sapiens OX=9606 GN=IGHV1-69D PE=1 SV=1	IGHV1-69D	MS2	MS2
	P37837	Transaldolase OS=Homo sapiens OX=9606 GN=TALDO1 PE=1 SV=2	TALDO1	WiMT	WiMT
	P02775	Platelet basic protein OS=Homo sapiens OX=9606 GN=PPBP PE=1 SV=3	PPBP	MS2	MS2
	P01767	Immunoglobulin heavy variable 3-53 OS=Homo sapiens OX=9606 GN=IGHV3-53 PE=1 SV=2	IGHV3-53	MS2	MS2
	P36222	Chitinase-3-like protein 1 OS=Homo sapiens OX=9606 GN=CHI3L1 PE=1 SV=2	CHI3L1	WiMT	WiMT
	Q05682-4	Isoform 4 of Caldesmon OS=Homo sapiens OX=9606 GN=CALD1	CALD1	WiMT	WiMT
	A0A087WW87	Immunoglobulin kappa variable 2-40 OS=Homo sapiens OX=9606 GN=IGKV2-40 PE=3 SV=2	IGKV2-40	MS2	MS2
	P01764	Immunoglobulin heavy variable 3-23 OS=Homo sapiens OX=9606 GN=IGHV3-23 PE=1 SV=2	IGHV3-23		MS2
	Q9BY67	Cell adhesion molecule 1 OS=Homo sapiens OX=9606 GN=CADM1 PE=1 SV=2	CADM1	WiMT	WiMT
	P00338	L-lactate dehydrogenase A chain OS=Homo sapiens OX=9606 GN=LDHA PE=1 SV=2	LDHA	WiMT	MS2
	P13688	Carcinoembryonic antigen-related cell adhesion molecule 1 OS=Homo sapiens OX=9606 GN=CEACAM1 PE=1 SV=2	CEACAM1	WiMT	WiMT
	P18669	Phosphoglycerate mutase 1 OS=Homo sapiens OX=9606 GN=PGAM1 PE=1 SV=2	PGAM1	WiMT	WiMT
	P19022	Cadherin-2 OS=Homo sapiens OX=9606 GN=CDH2 PE=1 SV=4	CDH2	WiMT	WiMT
	Q9BTY2	Plasma alpha-L-fucosidase OS=Homo sapiens OX=9606 GN=FUCA2 PE=1 SV=2	FUCA2	WiMT	WiMT
	P09619	Platelet-derived growth factor receptor beta OS=Homo sapiens OX=9606 GN=PDGFRB PE=1 SV=1	PDGFRB	WiMT	WiMT
	Q13093	Platelet-activating factor acetylhydrolase OS=Homo sapiens OX=9606 GN=PLA2G7 PE=1 SV=1	PLA2G7	MS2	MS2
	P05090	Apolipoprotein D OS=Homo sapiens OX=9606 GN=APOD PE=1 SV=1	APOD	MS2	MS2
	A0A0C4DH29	Immunoglobulin heavy variable 1-3 OS=Homo sapiens OX=9606 GN=IGHV1-3 PE=3 SV=1	IGHV1-3	MS2	MS2
	A0M8Q6	Immunoglobulin lambda constant 7 OS=Homo sapiens OX=9606 GN=IGLC7 PE=1 SV=3	IGLC7	MS2	MS2
	P01743	Immunoglobulin heavy variable 1-46 OS=Homo sapiens OX=9606 GN=IGHV1-46 PE=1 SV=2	IGHV1-46	MS2	MS2
	Q9UNN8	Endothelial protein C receptor OS=Homo sapiens OX=9606 GN=PROCR PE=1 SV=1	PROCR	WiMT	MS2
	P01619	Immunoglobulin kappa variable 3-20 OS=Homo sapiens OX=9606 GN=IGKV3-20 PE=1 SV=2	IGKV3-20	MS2	MS2
	P78324	Tyrosine-protein phosphatase non-receptor type substrate 1 OS=Homo sapiens OX=9606 GN=SIRPA PE=1 SV=2	SIRPA	WiMT	WiMT
	O75144	ICOS ligand OS=Homo sapiens OX=9606 GN=ICOSLG PE=1 SV=2	ICOSLG	MS2	WiMT
	P01721	Immunoglobulin lambda variable 6-57 OS=Homo sapiens OX=9606 GN=IGLV6-57 PE=1 SV=2	IGLV6-57	MS2	MS2
	P08253	72 kDa type IV collagenase OS=Homo sapiens OX=9606 GN=MMP2 PE=1 SV=2	MMP2	MS2	WiMT
	Q5TFQ8	Signal-regulatory protein beta-1 isoform 3 OS=Homo sapiens OX=9606 GN=SIRPB1 PE=1 SV=1	SIRPB1		WiMT
	A0A0C4DH33	Immunoglobulin heavy variable 1-24 OS=Homo sapiens OX=9606 GN=IGHV1-24 PE=3 SV=1	IGHV1-24	MS2	MS2
	P16112-2	Isoform 2 of Aggrecan core protein OS=Homo sapiens OX=9606 GN=ACAN	ACAN	WiMT	WiMT
	P31944	Caspase-14 OS=Homo sapiens OX=9606 GN=CASP14 PE=1 SV=2	CASP14	WiMT	MS2
	P01780	Immunoglobulin heavy variable 3-7 OS=Homo sapiens OX=9606 GN=IGHV3-7 PE=1 SV=2	IGHV3-7	MS2	MS2
	P08514	Integrin alpha-IIb OS=Homo sapiens OX=9606 GN=ITGA2B PE=1 SV=3	ITGA2B	MS2	MS2
	P07738	Bisphosphoglycerate mutase OS=Homo sapiens OX=9606 GN=BPGM PE=1 SV=2	BPGM	WiMT	WiMT
	P30041	Peroxiredoxin-6 OS=Homo sapiens OX=9606 GN=PRDX6 PE=1 SV=3	PRDX6	WiMT	MS2
	P04179	Superoxide dismutase [Mn], mitochondrial OS=Homo sapiens OX=9606 GN=SOD2 PE=1 SV=3	SOD2	WiMT	MS2
	Q13449	Limbic system-associated membrane protein OS=Homo sapiens OX=9606 GN=LSAMP PE=1 SV=2	LSAMP	WiMT	WiMT
	A0A0B4J1X5	Immunoglobulin heavy variable 3-74 OS=Homo sapiens OX=9606 GN=IGHV3-74 PE=3 SV=1	IGHV3-74	WiMT	MS2
	Q9Y5C1	Angiopoietin-related protein 3 OS=Homo sapiens OX=9606 GN=ANGPTL3 PE=1 SV=1	ANGPTL3	WiMT	WiMT
	Q14525	Keratin, type I cuticular Ha3-II OS=Homo sapiens OX=9606 GN=KRT33B PE=1 SV=3	KRT33B	WiMT	WiMT
	Q8NBS9	Thioredoxin domain-containing protein 5 OS=Homo sapiens OX=9606 GN=TXNDC5 PE=1 SV=2	TXNDC5	WiMT	WiMT
	P30530	Tyrosine-protein kinase receptor UFO OS=Homo sapiens OX=9606 GN=AXL PE=1 SV=4	AXL	WiMT	WiMT
	P08758	Annexin A5 OS=Homo sapiens OX=9606 GN=ANXA5 PE=1 SV=2	ANXA5	WiMT	WiMT
	P41222	Prostaglandin-H2 D-isomerase OS=Homo sapiens OX=9606 GN=PTGDS PE=1 SV=1	PTGDS	MS2	MS2
	P09211	Glutathione S-transferase P OS=Homo sapiens OX=9606 GN=GSTP1 PE=1 SV=2	GSTP1	WiMT	MS2
	P61158	Actin-related protein 3 OS=Homo sapiens OX=9606 GN=ACTR3 PE=1 SV=3	ACTR3	WiMT	WiMT
	P08123	Collagen alpha-2(I) chain OS=Homo sapiens OX=9606 GN=COL1A2 PE=1 SV=7	COL1A2	WiMT	WiMT
	P11597	Cholesteryl ester transfer protein OS=Homo sapiens OX=9606 GN=CETP PE=1 SV=2	CETP	MS2	MS2
	Q6UVK1	Chondroitin sulfate proteoglycan 4 OS=Homo sapiens OX=9606 GN=CSPG4 PE=1 SV=2	CSPG4	WiMT	WiMT
	P05451	Lithostathine-1-alpha OS=Homo sapiens OX=9606 GN=REG1A PE=1 SV=3	REG1A	WiMT	WiMT
	Q9H299	SH3 domain-binding glutamic acid-rich-like protein 3 OS=Homo sapiens OX=9606 GN=SH3BGRL3 PE=1 SV=1	SH3BGRL3	MS2	MS2
	Q02985	Complement factor H-related protein 3 OS=Homo sapiens OX=9606 GN=CFHR3 PE=1 SV=2	CFHR3	MS2	MS2
	P02452	Collagen alpha-1(I) chain OS=Homo sapiens OX=9606 GN=COL1A1 PE=1 SV=5	COL1A1	WiMT	WiMT
	Q9HDC9	Adipocyte plasma membrane-associated protein OS=Homo sapiens OX=9606 GN=APMAP PE=1 SV=2	APMAP	MS2	MS2
	P24592	Insulin-like growth factor-binding protein 6 OS=Homo sapiens OX=9606 GN=IGFBP6 PE=1 SV=1	IGFBP6	MS2	MS2
	P26992	Ciliary neurotrophic factor receptor subunit alpha OS=Homo sapiens OX=9606 GN=CNTFR PE=1 SV=2	CNTFR	WiMT	WiMT
	P14923	Junction plakoglobin OS=Homo sapiens OX=9606 GN=JUP PE=1 SV=3	JUP	WiMT	WiMT
	P55056	Apolipoprotein C-IV OS=Homo sapiens OX=9606 GN=APOC4 PE=1 SV=1	APOC4	MS2	MS2
	P20933	N(4)-(beta-N-acetylglucosaminyl)-L-asparaginase OS=Homo sapiens OX=9606 GN=AGA PE=1 SV=2	AGA	WiMT	WiMT
	P06331	Immunoglobulin heavy variable 4-34 OS=Homo sapiens OX=9606 GN=IGHV4-34 PE=1 SV=2	IGHV4-34	MS2	MS2
	Q9ULV4	Coronin-1C OS=Homo sapiens OX=9606 GN=CORO1C PE=1 SV=1	CORO1C	WiMT	MS2
	P50552	Vasodilator-stimulated phosphoprotein OS=Homo sapiens OX=9606 GN=VASP PE=1 SV=3	VASP	WiMT	MS2
	P07998	Ribonuclease pancreatic OS=Homo sapiens OX=9606 GN=RNASE1 PE=1 SV=4	RNASE1	MS2	MS2
	Q8IXL6	Extracellular serine/threonine protein kinase FAM20C OS=Homo sapiens OX=9606 GN=FAM20C PE=1 SV=2	FAM20C	WiMT	WiMT
	Q9Y646	Carboxypeptidase Q OS=Homo sapiens OX=9606 GN=CPQ PE=1 SV=1	CPQ	WiMT	WiMT
	P61769	Beta-2-microglobulin OS=Homo sapiens OX=9606 GN=B2M PE=1 SV=1	B2M	MS2	MS2
	P0DP08	Immunoglobulin heavy variable 4-38-2 OS=Homo sapiens OX=9606 GN=IGHV4-38-2 PE=3 SV=1	IGHV4-38-2	MS2	MS2
	P01706	Immunoglobulin lambda variable 2-11 OS=Homo sapiens OX=9606 GN=IGLV2-11 PE=1 SV=2	IGLV2-11	MS2	MS2
	Q9BYE9	Cadherin-related family member 2 OS=Homo sapiens OX=9606 GN=CDHR2 PE=1 SV=2	CDHR2	WiMT	WiMT
	P52565	Rho GDP-dissociation inhibitor 1 OS=Homo sapiens OX=9606 GN=ARHGDIA PE=1 SV=3	ARHGDIA	WiMT	WiMT
	Q13790	Apolipoprotein F OS=Homo sapiens OX=9606 GN=APOF PE=1 SV=2	APOF	MS2	MS2
	A0A075B6K4	Immunoglobulin lambda variable 3-10 OS=Homo sapiens OX=9606 GN=IGLV3-10 PE=3 SV=2	IGLV3-10	MS2	MS2
	P02654	Apolipoprotein C-I OS=Homo sapiens OX=9606 GN=APOC1 PE=1 SV=1	APOC1	MS2	MS2
	Q9UK23	N-acetylglucosamine-1-phosphodiester alpha-N-acetylglucosaminidase OS=Homo sapiens OX=9606 GN=NAGPA PE=1 SV=2	NAGPA	WiMT	WiMT
	Q99969	Retinoic acid receptor responder protein 2 OS=Homo sapiens OX=9606 GN=RARRES2 PE=1 SV=1	RARRES2	MS2	MS2
	P10645	Chromogranin-A OS=Homo sapiens OX=9606 GN=CHGA PE=1 SV=7	CHGA	WiMT	MS2
	Q92764	Keratin, type I cuticular Ha5 OS=Homo sapiens OX=9606 GN=KRT35 PE=2 SV=5	KRT35	WiMT	WiMT
	P32119	Peroxiredoxin-2 OS=Homo sapiens OX=9606 GN=PRDX2 PE=1 SV=5	PRDX2	MS2	MS2
	P02788	Lactotransferrin OS=Homo sapiens OX=9606 GN=LTF PE=1 SV=6	LTF	WiMT	WiMT
	Q86TH1	ADAMTS-like protein 2 OS=Homo sapiens OX=9606 GN=ADAMTSL2 PE=1 SV=1	ADAMTSL2	WiMT	WiMT
	P61916	NPC intracellular cholesterol transporter 2 OS=Homo sapiens OX=9606 GN=NPC2 PE=1 SV=1	NPC2	WiMT	WiMT
	Q08188	Protein-glutamine gamma-glutamyltransferase E OS=Homo sapiens OX=9606 GN=TGM3 PE=1 SV=4	TGM3	WiMT	WiMT
	P31151	Protein S100-A7 OS=Homo sapiens OX=9606 GN=S100A7 PE=1 SV=4	S100A7	WiMT	WiMT
	P80188	Neutrophil gelatinase-associated lipocalin OS=Homo sapiens OX=9606 GN=LCN2 PE=1 SV=2	LCN2	WiMT	WiMT
	P61224	Ras-related protein Rap-1b OS=Homo sapiens OX=9606 GN=RAP1B PE=1 SV=1	RAP1B	MS2	MS2
	P04439	HLA class I histocompatibility antigen, A alpha chain OS=Homo sapiens OX=9606 GN=HLA-A PE=1 SV=2	HLA-A	MS2	MS2
	P54108	Cysteine-rich secretory protein 3 OS=Homo sapiens OX=9606 GN=CRISP3 PE=1 SV=1	CRISP3	MS2	MS2
	P11362	Fibroblast growth factor receptor 1 OS=Homo sapiens OX=9606 GN=FGFR1 PE=1 SV=3	FGFR1	WiMT	WiMT
	O43895	Xaa-Pro aminopeptidase 2 OS=Homo sapiens OX=9606 GN=XPNPEP2 PE=1 SV=3	XPNPEP2	WiMT	WiMT
	P17813	Endoglin OS=Homo sapiens OX=9606 GN=ENG PE=1 SV=2	ENG	WiMT	WiMT
	P01599	Immunoglobulin kappa variable 1-17 OS=Homo sapiens OX=9606 GN=IGKV1-17 PE=1 SV=2	IGKV1-17	MS2	MS2
	A0A0C4DH73	Immunoglobulin kappa variable 1-12 OS=Homo sapiens OX=9606 GN=IGKV1-12 PE=3 SV=1	IGKV1-12	MS2	MS2
	P07355	Annexin A2 OS=Homo sapiens OX=9606 GN=ANXA2 PE=1 SV=2	ANXA2	WiMT	WiMT
	Q16851-2	Isoform 2 of UTP--glucose-1-phosphate uridylyltransferase OS=Homo sapiens OX=9606 GN=UGP2	UGP2	WiMT	WiMT
	Q9HBB8	Cadherin-related family member 5 OS=Homo sapiens OX=9606 GN=CDHR5 PE=1 SV=3	CDHR5	WiMT	WiMT
	O43280	Trehalase OS=Homo sapiens OX=9606 GN=TREH PE=1 SV=2	TREH	WiMT	WiMT
	P13598	Intercellular adhesion molecule 2 OS=Homo sapiens OX=9606 GN=ICAM2 PE=1 SV=2	ICAM2	MS2	MS2
	Q16270	Insulin-like growth factor-binding protein 7 OS=Homo sapiens OX=9606 GN=IGFBP7 PE=1 SV=1	IGFBP7	WiMT	WiMT
	P0DP01	Immunoglobulin heavy variable 1-8 OS=Homo sapiens OX=9606 GN=IGHV1-8 PE=3 SV=1	IGHV1-8	MS2	MS2
	O43852	Calumenin OS=Homo sapiens OX=9606 GN=CALU PE=1 SV=2	CALU	WiMT	WiMT
	Q7Z794	Keratin, type II cytoskeletal 1b OS=Homo sapiens OX=9606 GN=KRT77 PE=2 SV=3	KRT77	WiMT	WiMT
	P08174	Complement decay-accelerating factor OS=Homo sapiens OX=9606 GN=CD55 PE=1 SV=4	CD55	WiMT	WiMT
	P01889	HLA class I histocompatibility antigen, B alpha chain OS=Homo sapiens OX=9606 GN=HLA-B PE=1 SV=3	HLA-B	WiMT	WiMT
	P19021	Peptidyl-glycine alpha-amidating monooxygenase OS=Homo sapiens OX=9606 GN=PAM PE=1 SV=2	PAM	WiMT	WiMT
	O43493	Trans-Golgi network integral membrane protein 2 OS=Homo sapiens OX=9606 GN=TGOLN2 PE=1 SV=4	TGOLN2	WiMT	WiMT
	Q12907	Vesicular integral-membrane protein VIP36 OS=Homo sapiens OX=9606 GN=LMAN2 PE=1 SV=1	LMAN2	WiMT	WiMT
	P55072	Transitional endoplasmic reticulum ATPase OS=Homo sapiens OX=9606 GN=VCP PE=1 SV=4	VCP	WiMT	WiMT
	A0A0B4J1V6	Immunoglobulin heavy variable 3-73 OS=Homo sapiens OX=9606 GN=IGHV3-73 PE=3 SV=1	IGHV3-73	MS2	MS2
	A0A0B4J1U7	Immunoglobulin heavy variable 6-1 OS=Homo sapiens OX=9606 GN=IGHV6-1 PE=3 SV=1	IGHV6-1	MS2	MS2
	Q13103	Secreted phosphoprotein 24 OS=Homo sapiens OX=9606 GN=SPP2 PE=1 SV=1	SPP2	MS2	MS2
	P18065	Insulin-like growth factor-binding protein 2 OS=Homo sapiens OX=9606 GN=IGFBP2 PE=1 SV=2	IGFBP2	MS2	MS2
	P22304	Iduronate 2-sulfatase OS=Homo sapiens OX=9606 GN=IDS PE=1 SV=1	IDS	WiMT	WiMT
	Q14019	Coactosin-like protein OS=Homo sapiens OX=9606 GN=COTL1 PE=1 SV=3	COTL1	MS2	MS2
	Q8WZ75	Roundabout homolog 4 OS=Homo sapiens OX=9606 GN=ROBO4 PE=1 SV=1	ROBO4	WiMT	WiMT
	A0A075B6S5	Immunoglobulin kappa variable 1-27 OS=Homo sapiens OX=9606 GN=IGKV1-27 PE=3 SV=1	IGKV1-27	MS2	MS2
	Q3ZCW2	Galectin-related protein OS=Homo sapiens OX=9606 GN=LGALSL PE=1 SV=2	LGALSL	WiMT	WiMT
	P40925	Malate dehydrogenase, cytoplasmic OS=Homo sapiens OX=9606 GN=MDH1 PE=1 SV=4	MDH1	WiMT	WiMT
	P01714	Immunoglobulin lambda variable 3-19 OS=Homo sapiens OX=9606 GN=IGLV3-19 PE=1 SV=2	IGLV3-19	MS2	MS2
	Q9H1U4	Multiple epidermal growth factor-like domains protein 9 OS=Homo sapiens OX=9606 GN=MEGF9 PE=2 SV=3	MEGF9	WiMT	WiMT
	A0A075B6R2	Immunoglobulin heavy variable 4-4 OS=Homo sapiens OX=9606 GN=IGHV4-4 PE=3 SV=2	IGHV4-4	MS2	MS2
	P46531	Neurogenic locus notch homolog protein 1 OS=Homo sapiens OX=9606 GN=NOTCH1 PE=1 SV=4	NOTCH1	WiMT	WiMT
	O00584	Ribonuclease T2 OS=Homo sapiens OX=9606 GN=RNASET2 PE=1 SV=2	RNASET2	WiMT	WiMT
	P10321	HLA class I histocompatibility antigen, C alpha chain OS=Homo sapiens OX=9606 GN=HLA-C PE=1 SV=3	HLA-C	WiMT	WiMT
	Q8N149	Leukocyte immunoglobulin-like receptor subfamily A member 2 OS=Homo sapiens OX=9606 GN=LILRA2 PE=1 SV=2	LILRA2	WiMT	WiMT
	P01130	Low-density lipoprotein receptor OS=Homo sapiens OX=9606 GN=LDLR PE=1 SV=1	LDLR	WiMT	WiMT
	P01033	Metalloproteinase inhibitor 1 OS=Homo sapiens OX=9606 GN=TIMP1 PE=1 SV=1	TIMP1	MS2	MS2
	Q86UN3	Reticulon-4 receptor-like 2 OS=Homo sapiens OX=9606 GN=RTN4RL2 PE=1 SV=1	RTN4RL2	WiMT	WiMT
	O43505	Beta-1,4-glucuronyltransferase 1 OS=Homo sapiens OX=9606 GN=B4GAT1 PE=1 SV=1	B4GAT1	WiMT	WiMT
	P13727	Bone marrow proteoglycan OS=Homo sapiens OX=9606 GN=PRG2 PE=1 SV=2	PRG2	WiMT	WiMT
	Q8NBJ4	Golgi membrane protein 1 OS=Homo sapiens OX=9606 GN=GOLM1 PE=1 SV=1	GOLM1	WiMT	WiMT
	Q15942	Zyxin OS=Homo sapiens OX=9606 GN=ZYX PE=1 SV=1	ZYX	WiMT	MS2
	Q92496	Complement factor H-related protein 4 OS=Homo sapiens OX=9606 GN=CFHR4 PE=1 SV=3	CFHR4	MS2	MS2
	O15144	Actin-related protein 2/3 complex subunit 2 OS=Homo sapiens OX=9606 GN=ARPC2 PE=1 SV=1	ARPC2	WiMT	WiMT
	A0A0C4DH25	Immunoglobulin kappa variable 3D-20 OS=Homo sapiens OX=9606 GN=IGKV3D-20 PE=3 SV=1	IGKV3D-20	MS2	MS2
	Q99972	Myocilin OS=Homo sapiens OX=9606 GN=MYOC PE=1 SV=2	MYOC	WiMT	WiMT
	Q9NY97	N-acetyllactosaminide beta-1,3-N-acetylglucosaminyltransferase 2 OS=Homo sapiens OX=9606 GN=B3GNT2 PE=1 SV=2	B3GNT2	WiMT	WiMT
	P78509	Reelin OS=Homo sapiens OX=9606 GN=RELN PE=1 SV=3	RELN	WiMT	WiMT
	P07437	Tubulin beta chain OS=Homo sapiens OX=9606 GN=TUBB PE=1 SV=2	TUBB	WiMT	MS2
	P01766	Immunoglobulin heavy variable 3-13 OS=Homo sapiens OX=9606 GN=IGHV3-13 PE=1 SV=2	IGHV3-13	MS2	MS2
	P23141	Liver carboxylesterase 1 OS=Homo sapiens OX=9606 GN=CES1 PE=1 SV=2	CES1	WiMT	WiMT
	A0A0C4DH43	Immunoglobulin heavy variable 2-70D OS=Homo sapiens OX=9606 GN=IGHV2-70D PE=3 SV=1	IGHV2-70D	MS2	MS2
	P12429	Annexin A3 OS=Homo sapiens OX=9606 GN=ANXA3 PE=1 SV=3	ANXA3	WiMT	WiMT
	A0A075B6K5	Immunoglobulin lambda variable 3-9 OS=Homo sapiens OX=9606 GN=IGLV3-9 PE=3 SV=1	IGLV3-9	MS2	MS2
	P15086	Carboxypeptidase B OS=Homo sapiens OX=9606 GN=CPB1 PE=1 SV=4	CPB1	WiMT	WiMT
	Q9BWP8	Collectin-11 OS=Homo sapiens OX=9606 GN=COLEC11 PE=1 SV=1	COLEC11	MS2	MS2
	P52209	6-phosphogluconate dehydrogenase, decarboxylating OS=Homo sapiens OX=9606 GN=PGD PE=1 SV=3	PGD	WiMT	WiMT
	A0A087WSY6	Immunoglobulin kappa variable 3D-15 OS=Homo sapiens OX=9606 GN=IGKV3D-15 PE=3 SV=6	IGKV3D-15	MS2	MS2
	Q13867	Bleomycin hydrolase OS=Homo sapiens OX=9606 GN=BLMH PE=1 SV=1	BLMH	WiMT	WiMT
	P02461	Collagen alpha-1(III) chain OS=Homo sapiens OX=9606 GN=COL3A1 PE=1 SV=4	COL3A1	WiMT	WiMT
	Q6IBS0	Twinfilin-2 OS=Homo sapiens OX=9606 GN=TWF2 PE=1 SV=2	TWF2	WiMT	WiMT
	P13716	Delta-aminolevulinic acid dehydratase OS=Homo sapiens OX=9606 GN=ALAD PE=1 SV=1	ALAD	WiMT	WiMT
	P40199	Carcinoembryonic antigen-related cell adhesion molecule 6 OS=Homo sapiens OX=9606 GN=CEACAM6 PE=1 SV=3	CEACAM6	WiMT	WiMT
	O76013	Keratin, type I cuticular Ha6 OS=Homo sapiens OX=9606 GN=KRT36 PE=2 SV=1	KRT36	WiMT	WiMT
	Q9UQP3	Tenascin-N OS=Homo sapiens OX=9606 GN=TNN PE=1 SV=2	TNN	WiMT	WiMT
	Q9UJJ9	N-acetylglucosamine-1-phosphotransferase subunit gamma OS=Homo sapiens OX=9606 GN=GNPTG PE=1 SV=1	GNPTG	WiMT	WiMT
	O14498	Immunoglobulin superfamily containing leucine-rich repeat protein OS=Homo sapiens OX=9606 GN=ISLR PE=2 SV=1	ISLR	WiMT	WiMT
	P50895	Basal cell adhesion molecule OS=Homo sapiens OX=9606 GN=BCAM PE=1 SV=2	BCAM	WiMT	WiMT
	P32942	Intercellular adhesion molecule 3 OS=Homo sapiens OX=9606 GN=ICAM3 PE=1 SV=2	ICAM3	WiMT	WiMT
	Q9UBP4	Dickkopf-related protein 3 OS=Homo sapiens OX=9606 GN=DKK3 PE=1 SV=2	DKK3	WiMT	WiMT
	Q06830	Peroxiredoxin-1 OS=Homo sapiens OX=9606 GN=PRDX1 PE=1 SV=1	PRDX1	WiMT	WiMT
	O75326	Semaphorin-7A OS=Homo sapiens OX=9606 GN=SEMA7A PE=1 SV=1	SEMA7A	WiMT	WiMT
	P47756-2	Isoform 2 of F-actin-capping protein subunit beta OS=Homo sapiens OX=9606 GN=CAPZB	CAPZB	WiMT	MS2
	Q15485	Ficolin-2 OS=Homo sapiens OX=9606 GN=FCN2 PE=1 SV=2	FCN2	MS2	MS2
	Q14532	Keratin, type I cuticular Ha2 OS=Homo sapiens OX=9606 GN=KRT32 PE=2 SV=3	KRT32	WiMT	WiMT
	P06865	Beta-hexosaminidase subunit alpha OS=Homo sapiens OX=9606 GN=HEXA PE=1 SV=2	HEXA	WiMT	WiMT
	Q86U17	Serpin A11 OS=Homo sapiens OX=9606 GN=SERPINA11 PE=2 SV=2	SERPINA11	WiMT	MS2
	Q9UKU6	Thyrotropin-releasing hormone-degrading ectoenzyme OS=Homo sapiens OX=9606 GN=TRHDE PE=2 SV=1	TRHDE	WiMT	WiMT
	Q02487	Desmocollin-2 OS=Homo sapiens OX=9606 GN=DSC2 PE=1 SV=1	DSC2	WiMT	WiMT
	P06310	Immunoglobulin kappa variable 2-30 OS=Homo sapiens OX=9606 GN=IGKV2-30 PE=3 SV=2	IGKV2-30	MS2	MS2
	Q86SQ4	Adhesion G-protein coupled receptor G6 OS=Homo sapiens OX=9606 GN=ADGRG6 PE=1 SV=3	ADGRG6	WiMT	WiMT
	Q8WWZ8	Oncoprotein-induced transcript 3 protein OS=Homo sapiens OX=9606 GN=OIT3 PE=1 SV=2	OIT3	WiMT	WiMT
	P08575	Receptor-type tyrosine-protein phosphatase C OS=Homo sapiens OX=9606 GN=PTPRC PE=1 SV=3	PTPRC	WiMT	WiMT
	P61626	Lysozyme C OS=Homo sapiens OX=9606 GN=LYZ PE=1 SV=1	LYZ	MS2	MS2
	P01700	Immunoglobulin lambda variable 1-47 OS=Homo sapiens OX=9606 GN=IGLV1-47 PE=1 SV=2	IGLV1-47	MS2	MS2
	P02776	Platelet factor 4 OS=Homo sapiens OX=9606 GN=PF4 PE=1 SV=2	PF4	MS2	MS2
	Q13508	Ecto-ADP-ribosyltransferase 3 OS=Homo sapiens OX=9606 GN=ART3 PE=1 SV=2	ART3	WiMT	WiMT
	P13473	Lysosome-associated membrane glycoprotein 2 OS=Homo sapiens OX=9606 GN=LAMP2 PE=1 SV=2	LAMP2	MS2	MS2
	Q15084	Protein disulfide-isomerase A6 OS=Homo sapiens OX=9606 GN=PDIA6 PE=1 SV=1	PDIA6	WiMT	WiMT
	Q8IUK5	Plexin domain-containing protein 1 OS=Homo sapiens OX=9606 GN=PLXDC1 PE=1 SV=2	PLXDC1	WiMT	WiMT
	Q8N1N4	Keratin, type II cytoskeletal 78 OS=Homo sapiens OX=9606 GN=KRT78 PE=1 SV=2	KRT78	WiMT	WiMT
	O00462	Beta-mannosidase OS=Homo sapiens OX=9606 GN=MANBA PE=1 SV=3	MANBA	WiMT	WiMT
	P62328	Thymosin beta-4 OS=Homo sapiens OX=9606 GN=TMSB4X PE=1 SV=2	TMSB4X	MS2	MS2
	P01701	Immunoglobulin lambda variable 1-51 OS=Homo sapiens OX=9606 GN=IGLV1-51 PE=1 SV=2	IGLV1-51	MS2	MS2
	P07478	Trypsin-2 OS=Homo sapiens OX=9606 GN=PRSS2 PE=1 SV=1	PRSS2	WiMT	WiMT
	A0A0A0MS15	Immunoglobulin heavy variable 3-49 OS=Homo sapiens OX=9606 GN=IGHV3-49 PE=3 SV=1	IGHV3-49	MS2	MS2
	P02656	Apolipoprotein C-III OS=Homo sapiens OX=9606 GN=APOC3 PE=1 SV=1	APOC3	MS2	MS2
	P08238	Heat shock protein HSP 90-beta OS=Homo sapiens OX=9606 GN=HSP90AB1 PE=1 SV=4	HSP90AB1	WiMT	WiMT
	A0A0J9YXX1	Immunoglobulin heavy variable 5-10-1 OS=Homo sapiens OX=9606 GN=IGHV5-10-1 PE=3 SV=1	IGHV5-10-1	MS2	MS2
	Q9UBR2	Cathepsin Z OS=Homo sapiens OX=9606 GN=CTSZ PE=1 SV=1	CTSZ	WiMT	WiMT
	P01703	Immunoglobulin lambda variable 1-40 OS=Homo sapiens OX=9606 GN=IGLV1-40 PE=1 SV=2	IGLV1-40	MS2	MS2
	P28827	Receptor-type tyrosine-protein phosphatase mu OS=Homo sapiens OX=9606 GN=PTPRM PE=1 SV=2	PTPRM	WiMT	WiMT
	Q9NZT1	Calmodulin-like protein 5 OS=Homo sapiens OX=9606 GN=CALML5 PE=1 SV=2	CALML5	WiMT	WiMT
	P07602	Prosaposin OS=Homo sapiens OX=9606 GN=PSAP PE=1 SV=2	PSAP	WiMT	WiMT
	P31146	Coronin-1A OS=Homo sapiens OX=9606 GN=CORO1A PE=1 SV=4	CORO1A	WiMT	MS2
	O75015	Low affinity immunoglobulin gamma Fc region receptor III-B OS=Homo sapiens OX=9606 GN=FCGR3B PE=1 SV=2	FCGR3B	MS2	WiMT
	P16284	Platelet endothelial cell adhesion molecule OS=Homo sapiens OX=9606 GN=PECAM1 PE=1 SV=2	PECAM1	WiMT	WiMT
	Q13308	Inactive tyrosine-protein kinase 7 OS=Homo sapiens OX=9606 GN=PTK7 PE=1 SV=2	PTK7	WiMT	MS2
	Q92484	Acid sphingomyelinase-like phosphodiesterase 3a OS=Homo sapiens OX=9606 GN=SMPDL3A PE=1 SV=2	SMPDL3A	WiMT	WiMT
	P01601	Immunoglobulin kappa variable 1D-16 OS=Homo sapiens OX=9606 GN=IGKV1D-16 PE=3 SV=2	IGKV1D-16	MS2	MS2
	Q9NTU7	Cerebellin-4 OS=Homo sapiens OX=9606 GN=CBLN4 PE=1 SV=1	CBLN4	WiMT	WiMT
	Q5D862	Filaggrin-2 OS=Homo sapiens OX=9606 GN=FLG2 PE=1 SV=1	FLG2	WiMT	WiMT
	Q08554	Desmocollin-1 OS=Homo sapiens OX=9606 GN=DSC1 PE=1 SV=2	DSC1	WiMT	WiMT
	P09960	Leukotriene A-4 hydrolase OS=Homo sapiens OX=9606 GN=LTA4H PE=1 SV=2	LTA4H	WiMT	WiMT
	Q99715	Collagen alpha-1(XII) chain OS=Homo sapiens OX=9606 GN=COL12A1 PE=1 SV=2	COL12A1	WiMT	WiMT
	P07477	Trypsin-1 OS=Homo sapiens OX=9606 GN=PRSS1 PE=1 SV=1	PRSS1	MS2	MS2
	P34096	Ribonuclease 4 OS=Homo sapiens OX=9606 GN=RNASE4 PE=1 SV=3	RNASE4	WiMT	MS2
	P08637	Low affinity immunoglobulin gamma Fc region receptor III-A OS=Homo sapiens OX=9606 GN=FCGR3A PE=1 SV=2	FCGR3A	WiMT	WiMT
	Q96RD9	Fc receptor-like protein 5 OS=Homo sapiens OX=9606 GN=FCRL5 PE=1 SV=3	FCRL5	WiMT	WiMT
	A0A0C4DH67	Immunoglobulin kappa variable 1-8 OS=Homo sapiens OX=9606 GN=IGKV1-8 PE=3 SV=1	IGKV1-8	MS2	MS2
	P02794	Ferritin heavy chain OS=Homo sapiens OX=9606 GN=FTH1 PE=1 SV=2	FTH1	WiMT	WiMT
	O00151	PDZ and LIM domain protein 1 OS=Homo sapiens OX=9606 GN=PDLIM1 PE=1 SV=4	PDLIM1	WiMT	MS2
	O94919	Endonuclease domain-containing 1 protein OS=Homo sapiens OX=9606 GN=ENDOD1 PE=1 SV=2	ENDOD1	WiMT	WiMT
	A0A0C4DH32	Immunoglobulin heavy variable 3-20 OS=Homo sapiens OX=9606 GN=IGHV3-20 PE=3 SV=2	IGHV3-20	WiMT	MS2
	Q99650	Oncostatin-M-specific receptor subunit beta OS=Homo sapiens OX=9606 GN=OSMR PE=1 SV=1	OSMR		WiMT
	O95834	Echinoderm microtubule-associated protein-like 2 OS=Homo sapiens OX=9606 GN=EML2 PE=1 SV=1	EML2	WiMT	WiMT
	P01040	Cystatin-A OS=Homo sapiens OX=9606 GN=CSTA PE=1 SV=1	CSTA	WiMT	WiMT
	P08887	Interleukin-6 receptor subunit alpha OS=Homo sapiens OX=9606 GN=IL6R PE=1 SV=1	IL6R	WiMT	WiMT
	P22314	Ubiquitin-like modifier-activating enzyme 1 OS=Homo sapiens OX=9606 GN=UBA1 PE=1 SV=3	UBA1	WiMT	WiMT
	Q9Y6N7	Roundabout homolog 1 OS=Homo sapiens OX=9606 GN=ROBO1 PE=1 SV=1	ROBO1	WiMT	WiMT
	P01344	Insulin-like growth factor II OS=Homo sapiens OX=9606 GN=IGF2 PE=1 SV=1	IGF2	MS2	MS2
	Q8IUL8	Cartilage intermediate layer protein 2 OS=Homo sapiens OX=9606 GN=CILP2 PE=2 SV=2	CILP2	WiMT	WiMT
	Q7Z3B1	Neuronal growth regulator 1 OS=Homo sapiens OX=9606 GN=NEGR1 PE=1 SV=3	NEGR1	WiMT	WiMT
	Q14697	Neutral alpha-glucosidase AB OS=Homo sapiens OX=9606 GN=GANAB PE=1 SV=3	GANAB	WiMT	MS2
	P11279	Lysosome-associated membrane glycoprotein 1 OS=Homo sapiens OX=9606 GN=LAMP1 PE=1 SV=3	LAMP1	WiMT	MS2
	P55268	Laminin subunit beta-2 OS=Homo sapiens OX=9606 GN=LAMB2 PE=1 SV=2	LAMB2	WiMT	WiMT
	P55285	Cadherin-6 OS=Homo sapiens OX=9606 GN=CDH6 PE=1 SV=1	CDH6	WiMT	WiMT
	P09467	Fructose-1,6-bisphosphatase 1 OS=Homo sapiens OX=9606 GN=FBP1 PE=1 SV=5	FBP1	WiMT	WiMT
	P02144	Myoglobin OS=Homo sapiens OX=9606 GN=MB PE=1 SV=2	MB		WiMT
	Q01469	Fatty acid-binding protein 5 OS=Homo sapiens OX=9606 GN=FABP5 PE=1 SV=3	FABP5	WiMT	WiMT
	P01699	Immunoglobulin lambda variable 1-44 OS=Homo sapiens OX=9606 GN=IGLV1-44 PE=1 SV=2	IGLV1-44	MS2	MS2
	P05067	Amyloid-beta precursor protein OS=Homo sapiens OX=9606 GN=APP PE=1 SV=3	APP	WiMT	WiMT
	A0A075B6Q5	Immunoglobulin heavy variable 3-64 OS=Homo sapiens OX=9606 GN=IGHV3-64 PE=3 SV=1	IGHV3-64	MS2	MS2
	P13798	Acylamino-acid-releasing enzyme OS=Homo sapiens OX=9606 GN=APEH PE=1 SV=4	APEH	WiMT	WiMT
	A0A0B4J1X8	Immunoglobulin heavy variable 3-43 OS=Homo sapiens OX=9606 GN=IGHV3-43 PE=3 SV=1	IGHV3-43	MS2	MS2
	P01893	Putative HLA class I histocompatibility antigen, alpha chain H OS=Homo sapiens OX=9606 GN=HLA-H PE=5 SV=3	HLA-H	WiMT	WiMT
	O14818	Proteasome subunit alpha type-7 OS=Homo sapiens OX=9606 GN=PSMA7 PE=1 SV=1	PSMA7	WiMT	WiMT
	P15531	Nucleoside diphosphate kinase A OS=Homo sapiens OX=9606 GN=NME1 PE=1 SV=1	NME1	WiMT	WiMT
	Q13201	Multimerin-1 OS=Homo sapiens OX=9606 GN=MMRN1 PE=1 SV=3	MMRN1	WiMT	MS2
	P69891	Hemoglobin subunit gamma-1 OS=Homo sapiens OX=9606 GN=HBG1 PE=1 SV=2	HBG1	MS2	MS2
	P35237	Serpin B6 OS=Homo sapiens OX=9606 GN=SERPINB6 PE=1 SV=3	SERPINB6	WiMT	WiMT
	P15814	Immunoglobulin lambda-like polypeptide 1 OS=Homo sapiens OX=9606 GN=IGLL1 PE=1 SV=1	IGLL1	MS2	MS2
	P02741	C-reactive protein OS=Homo sapiens OX=9606 GN=CRP PE=1 SV=1	CRP	MS2	MS2
	Q9NPR2	Semaphorin-4B OS=Homo sapiens OX=9606 GN=SEMA4B PE=1 SV=4	SEMA4B	WiMT	WiMT
	Q13162	Peroxiredoxin-4 OS=Homo sapiens OX=9606 GN=PRDX4 PE=1 SV=1	PRDX4	WiMT	WiMT
	P09525	Annexin A4 OS=Homo sapiens OX=9606 GN=ANXA4 PE=1 SV=4	ANXA4	WiMT	WiMT
	Q86UD1	Out at first protein homolog OS=Homo sapiens OX=9606 GN=OAF PE=2 SV=1	OAF	MS2	MS2
	P22692	Insulin-like growth factor-binding protein 4 OS=Homo sapiens OX=9606 GN=IGFBP4 PE=1 SV=2	IGFBP4	MS2	MS2
	P01718	Immunoglobulin lambda variable 3-27 OS=Homo sapiens OX=9606 GN=IGLV3-27 PE=1 SV=2	IGLV3-27	MS2	MS2
	Q5JPE7	Nodal modulator 2 OS=Homo sapiens OX=9606 GN=NOMO2 PE=1 SV=1	NOMO2	WiMT	WiMT
	O15143	Actin-related protein 2/3 complex subunit 1B OS=Homo sapiens OX=9606 GN=ARPC1B PE=1 SV=3	ARPC1B	WiMT	WiMT
	A2NJV5	Immunoglobulin kappa variable 2-29 OS=Homo sapiens OX=9606 GN=IGKV2-29 PE=3 SV=2	IGKV2-29	MS2	MS2
	P15311	Ezrin OS=Homo sapiens OX=9606 GN=EZR PE=1 SV=4	EZR	WiMT	WiMT
	A0A075B6S6	Immunoglobulin kappa variable 2D-30 OS=Homo sapiens OX=9606 GN=IGKV2D-30 PE=3 SV=1	IGKV2D-30	MS2	MS2
	A0A075B6K0	Immunoglobulin lambda variable 3-16 OS=Homo sapiens OX=9606 GN=IGLV3-16 PE=3 SV=2	IGLV3-16	MS2	MS2
	Q9H853	Putative tubulin-like protein alpha-4B OS=Homo sapiens OX=9606 GN=TUBA4B PE=5 SV=2	TUBA4B	WiMT	MS2
	P10451	Osteopontin OS=Homo sapiens OX=9606 GN=SPP1 PE=1 SV=1	SPP1	WiMT	WiMT
	P05186	Alkaline phosphatase, tissue-nonspecific isozyme OS=Homo sapiens OX=9606 GN=ALPL PE=1 SV=4	ALPL	WiMT	WiMT
	Q9UIB8	SLAM family member 5 OS=Homo sapiens OX=9606 GN=CD84 PE=1 SV=1	CD84	WiMT	WiMT
	A0A0B4J1V2	Immunoglobulin heavy variable 2-26 OS=Homo sapiens OX=9606 GN=IGHV2-26 PE=3 SV=1	IGHV2-26	MS2	MS2
	Q9HC38-2	Isoform 2 of Glyoxalase domain-containing protein 4 OS=Homo sapiens OX=9606 GN=GLOD4	GLOD4	WiMT	WiMT
	P05109	Protein S100-A8 OS=Homo sapiens OX=9606 GN=S100A8 PE=1 SV=1	S100A8	MS2	MS2
	P60660	Myosin light polypeptide 6 OS=Homo sapiens OX=9606 GN=MYL6 PE=1 SV=2	MYL6	MS2	MS2
	P01593	Immunoglobulin kappa variable 1D-33 OS=Homo sapiens OX=9606 GN=IGKV1D-33 PE=1 SV=2	IGKV1D-33	MS2	MS2
	O43451	Maltase-glucoamylase, intestinal OS=Homo sapiens OX=9606 GN=MGAM PE=1 SV=5	MGAM	WiMT	WiMT
	P06312	Immunoglobulin kappa variable 4-1 OS=Homo sapiens OX=9606 GN=IGKV4-1 PE=1 SV=1	IGKV4-1	MS2	MS2
	Q9Y5Y7	Lymphatic vessel endothelial hyaluronic acid receptor 1 OS=Homo sapiens OX=9606 GN=LYVE1 PE=1 SV=2	LYVE1	MS2	MS2
	P10124	Serglycin OS=Homo sapiens OX=9606 GN=SRGN PE=1 SV=3	SRGN	WiMT	WiMT
	Q9UBQ6	Exostosin-like 2 OS=Homo sapiens OX=9606 GN=EXTL2 PE=1 SV=1	EXTL2	WiMT	WiMT
	Q14314	Fibroleukin OS=Homo sapiens OX=9606 GN=FGL2 PE=1 SV=1	FGL2	WiMT	WiMT
	P60900	Proteasome subunit alpha type-6 OS=Homo sapiens OX=9606 GN=PSMA6 PE=1 SV=1	PSMA6	WiMT	WiMT
	Q8TDY8	Immunoglobulin superfamily DCC subclass member 4 OS=Homo sapiens OX=9606 GN=IGDCC4 PE=1 SV=1	IGDCC4	WiMT	WiMT
	Q13418	Integrin-linked protein kinase OS=Homo sapiens OX=9606 GN=ILK PE=1 SV=2	ILK	WiMT	MS2
	P0DSN7	Probable non-functional immunoglobulinn kappa variable 1D-37 OS=Homo sapiens OX=9606 GN=IGKV1D-37 PE=5 SV=1	IGKV1D-37	MS2	MS2
	A0A075B6H9	Immunoglobulin lambda variable 4-69 OS=Homo sapiens OX=9606 GN=IGLV4-69 PE=1 SV=1	IGLV4-69	MS2	MS2
	P04433	Immunoglobulin kappa variable 3-11 OS=Homo sapiens OX=9606 GN=IGKV3-11 PE=1 SV=1	IGKV3-11	MS2	MS2
	A0A0J9YX35	Immunoglobulin heavy variable 3-64D OS=Homo sapiens OX=9606 GN=IGHV3-64D PE=3 SV=1	IGHV3-64D	MS2	MS2
	P07384	Calpain-1 catalytic subunit OS=Homo sapiens OX=9606 GN=CAPN1 PE=1 SV=1	CAPN1	WiMT	WiMT
	P42785	Lysosomal Pro-X carboxypeptidase OS=Homo sapiens OX=9606 GN=PRCP PE=1 SV=1	PRCP	WiMT	WiMT
	P08236	Beta-glucuronidase OS=Homo sapiens OX=9606 GN=GUSB PE=1 SV=2	GUSB	WiMT	WiMT
	A0A0B4J1V0	Immunoglobulin heavy variable 3-15 OS=Homo sapiens OX=9606 GN=IGHV3-15 PE=3 SV=1	IGHV3-15	MS2	MS2
	O94985	Calsyntenin-1 OS=Homo sapiens OX=9606 GN=CLSTN1 PE=1 SV=1	CLSTN1	WiMT	WiMT
	Q16881	Thioredoxin reductase 1, cytoplasmic OS=Homo sapiens OX=9606 GN=TXNRD1 PE=1 SV=3	TXNRD1	WiMT	WiMT
	P27482	Calmodulin-like protein 3 OS=Homo sapiens OX=9606 GN=CALML3 PE=1 SV=2	CALML3	WiMT	WiMT
	P27930	Interleukin-1 receptor type 2 OS=Homo sapiens OX=9606 GN=IL1R2 PE=1 SV=1	IL1R2	WiMT	WiMT
	Q9HCU0	Endosialin OS=Homo sapiens OX=9606 GN=CD248 PE=1 SV=1	CD248	WiMT	WiMT
	P13489	Ribonuclease inhibitor OS=Homo sapiens OX=9606 GN=RNH1 PE=1 SV=2	RNH1	WiMT	WiMT
	P24593	Insulin-like growth factor-binding protein 5 OS=Homo sapiens OX=9606 GN=IGFBP5 PE=1 SV=1	IGFBP5	WiMT	WiMT
	P23471	Receptor-type tyrosine-protein phosphatase zeta OS=Homo sapiens OX=9606 GN=PTPRZ1 PE=1 SV=4	PTPRZ1	WiMT	WiMT
	P99999	Cytochrome c OS=Homo sapiens OX=9606 GN=CYCS PE=1 SV=2	CYCS	WiMT	WiMT
	P05089	Arginase-1 OS=Homo sapiens OX=9606 GN=ARG1 PE=1 SV=2	ARG1	WiMT	WiMT
	P55103	Inhibin beta C chain OS=Homo sapiens OX=9606 GN=INHBC PE=2 SV=1	INHBC	MS2	MS2
	P56199	Integrin alpha-1 OS=Homo sapiens OX=9606 GN=ITGA1 PE=1 SV=2	ITGA1	WiMT	WiMT
	P01709	Immunoglobulin lambda variable 2-8 OS=Homo sapiens OX=9606 GN=IGLV2-8 PE=1 SV=2	IGLV2-8	MS2	MS2
	Q08ET2	Sialic acid-binding Ig-like lectin 14 OS=Homo sapiens OX=9606 GN=SIGLEC14 PE=1 SV=1	SIGLEC14	WiMT	WiMT
	O75368	SH3 domain-binding glutamic acid-rich-like protein OS=Homo sapiens OX=9606 GN=SH3BGRL PE=1 SV=1	SH3BGRL	WiMT	WiMT
	O75339	Cartilage intermediate layer protein 1 OS=Homo sapiens OX=9606 GN=CILP PE=1 SV=4	CILP	WiMT	WiMT
	P80723	Brain acid soluble protein 1 OS=Homo sapiens OX=9606 GN=BASP1 PE=1 SV=2	BASP1	WiMT	WiMT
	Q9Y6Z7	Collectin-10 OS=Homo sapiens OX=9606 GN=COLEC10 PE=1 SV=2	COLEC10	WiMT	MS2
	Q9Y279	V-set and immunoglobulin domain-containing protein 4 OS=Homo sapiens OX=9606 GN=VSIG4 PE=1 SV=1	VSIG4	WiMT	WiMT
	Q92520	Protein FAM3C OS=Homo sapiens OX=9606 GN=FAM3C PE=1 SV=1	FAM3C	WiMT	WiMT
	A0A0C4DH34	Immunoglobulin heavy variable 4-28 OS=Homo sapiens OX=9606 GN=IGHV4-28 PE=3 SV=1	IGHV4-28	MS2	MS2
	P09417	Dihydropteridine reductase OS=Homo sapiens OX=9606 GN=QDPR PE=1 SV=2	QDPR	WiMT	WiMT
	Q9NSB4	Keratin, type II cuticular Hb2 OS=Homo sapiens OX=9606 GN=KRT82 PE=3 SV=3	KRT82	WiMT	WiMT
	Q15555	Microtubule-associated protein RP/EB family member 2 OS=Homo sapiens OX=9606 GN=MAPRE2 PE=1 SV=1	MAPRE2	WiMT	WiMT
	A0A0C4DH36	Probable non-functional immunoglobulin heavy variable 3-38 OS=Homo sapiens OX=9606 GN=IGHV3-38 PE=5 SV=1	IGHV3-38	MS2	MS2
	P15085	Carboxypeptidase A1 OS=Homo sapiens OX=9606 GN=CPA1 PE=1 SV=2	CPA1	WiMT	WiMT
	Q96HD1	Protein disulfide isomerase CRELD1 OS=Homo sapiens OX=9606 GN=CRELD1 PE=1 SV=3	CRELD1	WiMT	WiMT
	Q12866	Tyrosine-protein kinase Mer OS=Homo sapiens OX=9606 GN=MERTK PE=1 SV=2	MERTK	WiMT	WiMT
	P20810	Calpastatin OS=Homo sapiens OX=9606 GN=CAST PE=1 SV=4	CAST		WiMT
	O15511	Actin-related protein 2/3 complex subunit 5 OS=Homo sapiens OX=9606 GN=ARPC5 PE=1 SV=3	ARPC5	WiMT	WiMT
	P48357	Leptin receptor OS=Homo sapiens OX=9606 GN=LEPR PE=1 SV=2	LEPR	WiMT	WiMT
	Q8IZP9	Adhesion G-protein coupled receptor G2 OS=Homo sapiens OX=9606 GN=ADGRG2 PE=1 SV=2	ADGRG2	WiMT	WiMT
	Q9BXJ4-3	Isoform 3 of Complement C1q tumor necrosis factor-related protein 3 OS=Homo sapiens OX=9606 GN=C1QTNF3	C1QTNF3	WiMT	WiMT
	Q8TER0	Sushi, nidogen and EGF-like domain-containing protein 1 OS=Homo sapiens OX=9606 GN=SNED1 PE=2 SV=2	SNED1	WiMT	WiMT
	P0DP25	Calmodulin-3 OS=Homo sapiens OX=9606 GN=CALM3 PE=1 SV=1	CALM3	WiMT	WiMT
	P53634	Dipeptidyl peptidase 1 OS=Homo sapiens OX=9606 GN=CTSC PE=1 SV=2	CTSC	WiMT	WiMT
	A0A075B6R9	Probable non-functional immunoglobulin kappa variable 2D-24 OS=Homo sapiens OX=9606 GN=IGKV2D-24 PE=5 SV=1	IGKV2D-24	MS2	MS2
	P55083	Microfibril-associated glycoprotein 4 OS=Homo sapiens OX=9606 GN=MFAP4 PE=1 SV=2	MFAP4	WiMT	WiMT
	Q9UEW3	Macrophage receptor MARCO OS=Homo sapiens OX=9606 GN=MARCO PE=1 SV=1	MARCO	WiMT	WiMT
	A0A075B6J9	Immunoglobulin lambda variable 2-18 OS=Homo sapiens OX=9606 GN=IGLV2-18 PE=3 SV=2	IGLV2-18	MS2	MS2
	Q12841	Follistatin-related protein 1 OS=Homo sapiens OX=9606 GN=FSTL1 PE=1 SV=1	FSTL1	WiMT	WiMT
	P17927	Complement receptor type 1 OS=Homo sapiens OX=9606 GN=CR1 PE=1 SV=3	CR1	WiMT	WiMT
	P23284	Peptidyl-prolyl cis-trans isomerase B OS=Homo sapiens OX=9606 GN=PPIB PE=1 SV=2	PPIB	MS2	MS2
	Q9HCN6	Platelet glycoprotein VI OS=Homo sapiens OX=9606 GN=GP6 PE=1 SV=4	GP6	WiMT	WiMT
	P19013	Keratin, type II cytoskeletal 4 OS=Homo sapiens OX=9606 GN=KRT4 PE=1 SV=4	KRT4	WiMT	WiMT
	P49913	Cathelicidin antimicrobial peptide OS=Homo sapiens OX=9606 GN=CAMP PE=1 SV=1	CAMP	MS2	MS2
	P48304	Lithostathine-1-beta OS=Homo sapiens OX=9606 GN=REG1B PE=1 SV=1	REG1B	WiMT	WiMT
	P50453	Serpin B9 OS=Homo sapiens OX=9606 GN=SERPINB9 PE=1 SV=1	SERPINB9	WiMT	WiMT
	Q9HCL0	Protocadherin-18 OS=Homo sapiens OX=9606 GN=PCDH18 PE=2 SV=3	PCDH18	WiMT	WiMT
	O60279	Sushi domain-containing protein 5 OS=Homo sapiens OX=9606 GN=SUSD5 PE=1 SV=3	SUSD5	WiMT	WiMT
	P61160	Actin-related protein 2 OS=Homo sapiens OX=9606 GN=ACTR2 PE=1 SV=1	ACTR2	WiMT	WiMT
	P08729	Keratin, type II cytoskeletal 7 OS=Homo sapiens OX=9606 GN=KRT7 PE=1 SV=5	KRT7	WiMT	WiMT
	P16581	E-selectin OS=Homo sapiens OX=9606 GN=SELE PE=1 SV=1	SELE	WiMT	WiMT
	Q9P121	Neurotrimin OS=Homo sapiens OX=9606 GN=NTM PE=1 SV=1	NTM	WiMT	WiMT
	O75223	Gamma-glutamylcyclotransferase OS=Homo sapiens OX=9606 GN=GGCT PE=1 SV=1	GGCT	WiMT	WiMT
	P12883	Myosin-7 OS=Homo sapiens OX=9606 GN=MYH7 PE=1 SV=5	MYH7		WiMT
	P31947	14-3-3 protein sigma OS=Homo sapiens OX=9606 GN=SFN PE=1 SV=1	SFN	MS2	WiMT
	P01817	Immunoglobulin heavy variable 2-5 OS=Homo sapiens OX=9606 GN=IGHV2-5 PE=1 SV=2	IGHV2-5	MS2	MS2
	P12273	Prolactin-inducible protein OS=Homo sapiens OX=9606 GN=PIP PE=1 SV=1	PIP	WiMT	WiMT
	Q9Y2E5	Epididymis-specific alpha-mannosidase OS=Homo sapiens OX=9606 GN=MAN2B2 PE=1 SV=4	MAN2B2	WiMT	WiMT
	Q9HAT2	Sialate O-acetylesterase OS=Homo sapiens OX=9606 GN=SIAE PE=1 SV=1	SIAE	WiMT	WiMT
	P58546	Myotrophin OS=Homo sapiens OX=9606 GN=MTPN PE=1 SV=2	MTPN	WiMT	WiMT
	Q16620	BDNF/NT-3 growth factors receptor OS=Homo sapiens OX=9606 GN=NTRK2 PE=1 SV=1	NTRK2	WiMT	WiMT
	P01704	Immunoglobulin lambda variable 2-14 OS=Homo sapiens OX=9606 GN=IGLV2-14 PE=1 SV=2	IGLV2-14	MS2	MS2
	O00592	Podocalyxin OS=Homo sapiens OX=9606 GN=PODXL PE=1 SV=2	PODXL	WiMT	WiMT
	Q8NFT8	Delta and Notch-like epidermal growth factor-related receptor OS=Homo sapiens OX=9606 GN=DNER PE=1 SV=1	DNER		WiMT
	P04430	Immunoglobulin kappa variable 1-16 OS=Homo sapiens OX=9606 GN=IGKV1-16 PE=1 SV=2	IGKV1-16	MS2	MS2
	Q9UMX5	Neudesin OS=Homo sapiens OX=9606 GN=NENF PE=1 SV=1	NENF	WiMT	WiMT
	O60449	Lymphocyte antigen 75 OS=Homo sapiens OX=9606 GN=LY75 PE=1 SV=3	LY75	WiMT	WiMT
	Q9HCB6	Spondin-1 OS=Homo sapiens OX=9606 GN=SPON1 PE=1 SV=2	SPON1	WiMT	WiMT
	O14950	Myosin regulatory light chain 12B OS=Homo sapiens OX=9606 GN=MYL12B PE=1 SV=2	MYL12B	MS2	MS2
	Q15262	Receptor-type tyrosine-protein phosphatase kappa OS=Homo sapiens OX=9606 GN=PTPRK PE=1 SV=2	PTPRK	WiMT	WiMT
	P10619	Lysosomal protective protein OS=Homo sapiens OX=9606 GN=CTSA PE=1 SV=2	CTSA	WiMT	WiMT
	Q13835	Plakophilin-1 OS=Homo sapiens OX=9606 GN=PKP1 PE=1 SV=2	PKP1	WiMT	WiMT
	P28066	Proteasome subunit alpha type-5 OS=Homo sapiens OX=9606 GN=PSMA5 PE=1 SV=3	PSMA5		WiMT
	A0A0B4J1Y8	Immunoglobulin lambda variable 9-49 OS=Homo sapiens OX=9606 GN=IGLV9-49 PE=1 SV=1	IGLV9-49	MS2	MS2
	Q7RTS7	Keratin, type II cytoskeletal 74 OS=Homo sapiens OX=9606 GN=KRT74 PE=1 SV=2	KRT74	WiMT	WiMT
	P54764	Ephrin type-A receptor 4 OS=Homo sapiens OX=9606 GN=EPHA4 PE=1 SV=1	EPHA4	WiMT	WiMT
	Q7Z5N4	Protein sidekick-1 OS=Homo sapiens OX=9606 GN=SDK1 PE=2 SV=3	SDK1	WiMT	WiMT
	Q9Y274	Type 2 lactosamine alpha-2,3-sialyltransferase OS=Homo sapiens OX=9606 GN=ST3GAL6 PE=1 SV=1	ST3GAL6	WiMT	WiMT
	P12318	Low affinity immunoglobulin gamma Fc region receptor II-a OS=Homo sapiens OX=9606 GN=FCGR2A PE=1 SV=4	FCGR2A	WiMT	WiMT
	P14550	Aldo-keto reductase family 1 member A1 OS=Homo sapiens OX=9606 GN=AKR1A1 PE=1 SV=3	AKR1A1	WiMT	WiMT
	P13929	Beta-enolase OS=Homo sapiens OX=9606 GN=ENO3 PE=1 SV=5	ENO3		WiMT
	P31431	Syndecan-4 OS=Homo sapiens OX=9606 GN=SDC4 PE=1 SV=2	SDC4	WiMT	WiMT
	P18850	Cyclic AMP-dependent transcription factor ATF-6 alpha OS=Homo sapiens OX=9606 GN=ATF6 PE=1 SV=3	ATF6		WiMT
	P15121	Aldo-keto reductase family 1 member B1 OS=Homo sapiens OX=9606 GN=AKR1B1 PE=1 SV=3	AKR1B1	WiMT	WiMT
	P05121	Plasminogen activator inhibitor 1 OS=Homo sapiens OX=9606 GN=SERPINE1 PE=1 SV=1	SERPINE1	WiMT	WiMT
	A0A0A0MS14	Immunoglobulin heavy variable 1-45 OS=Homo sapiens OX=9606 GN=IGHV1-45 PE=3 SV=1	IGHV1-45	MS2	MS2
	Q7Z7M8	UDP-GlcNAc:betaGal beta-1,3-N-acetylglucosaminyltransferase 8 OS=Homo sapiens OX=9606 GN=B3GNT8 PE=1 SV=1	B3GNT8		WiMT
	P27824	Calnexin OS=Homo sapiens OX=9606 GN=CANX PE=1 SV=2	CANX	WiMT	WiMT
	Q9UM47	Neurogenic locus notch homolog protein 3 OS=Homo sapiens OX=9606 GN=NOTCH3 PE=1 SV=2	NOTCH3	WiMT	WiMT
	Q9NQ38	Serine protease inhibitor Kazal-type 5 OS=Homo sapiens OX=9606 GN=SPINK5 PE=1 SV=2	SPINK5	WiMT	WiMT
	P06732	Creatine kinase M-type OS=Homo sapiens OX=9606 GN=CKM PE=1 SV=2	CKM	WiMT	WiMT
	P23435	Cerebellin-1 OS=Homo sapiens OX=9606 GN=CBLN1 PE=1 SV=1	CBLN1		WiMT
	P54727	UV excision repair protein RAD23 homolog B OS=Homo sapiens OX=9606 GN=RAD23B PE=1 SV=1	RAD23B	WiMT	WiMT
	Q9NR71	Neutral ceramidase OS=Homo sapiens OX=9606 GN=ASAH2 PE=1 SV=2	ASAH2	WiMT	WiMT
	P62987	Ubiquitin-60S ribosomal protein L40 OS=Homo sapiens OX=9606 GN=UBA52 PE=1 SV=2	UBA52	MS2	MS2
	A0A0B4J2D9	Immunoglobulin kappa variable 1D-13 OS=Homo sapiens OX=9606 GN=IGKV1D-13 PE=3 SV=1	IGKV1D-13	MS2	MS2
	P09104	Gamma-enolase OS=Homo sapiens OX=9606 GN=ENO2 PE=1 SV=3	ENO2		WiMT
	Q99983	Osteomodulin OS=Homo sapiens OX=9606 GN=OMD PE=1 SV=1	OMD	WiMT	WiMT
[truncated: 440 more rows]

## Sheet: Table S8
	Table S8: Probablitity of proteins from public repository being a plasma protein. Public repository available in: https://www.proteinatlas.org
[truncated: 3,224 more rows]

[truncated: 1 more sheets: Table S9]
